# Supplementary material for: Phosphine-catalyzed enantioselective and diastereodivergent [3+2] cyclization for the construction of oxetane dispirooxindole skeletons
Source: Royal Society of Chemistry journal article supplement (doi:10.1039/d4cc03610g), 2024-01-01

## Supporting information

### Phosphine Catalyzed Enantioselective and Diastereodivergent [3+2] Cyclization for Construction of Oxetane Dispirooxindole Skeletons

Xiao Han<sup>†,II</sup>, Jie Hou<sup>†,II</sup>, Haiyan Zhang<sup>†</sup>, Zhen Wang<sup>‡,\*</sup> and Weijun Yao<sup>†,\*</sup>

<sup>†</sup> School of Chemistry and Chemical Engineering, Zhejiang Sci-Tech University, Hangzhou, 310018, P. R. of China;

<sup>‡</sup> School of Pharmaceutical Sciences and Chongqing Key Laboratory of Natural Drug Research, Chongqing University, Chongqing 401331, P.R. China.

<sup>II</sup> H. X. and H. J. contributed equally.

\* Orgywj@zstu.edu.cn; wangz1114@cqu.edu.cn.

#### Table of contents

|   |                                                                                 |     |
|---|---------------------------------------------------------------------------------|-----|
| A | General information                                                             | S1  |
| B | Synthesis and characterization of oxetane MBH carbonates <b>2</b>               | S1  |
| C | Optimization for the reaction                                                   | S3  |
| D | General procedure for the synthesis of <i>syn</i> isomer with <b>(-)-DIOP</b>   | S5  |
| E | Analytic data for the <i>syn</i> isomer.                                        | S6  |
| F | General procedure for the synthesis of <i>anti</i> isomer with <b>(R)-SITCP</b> | S30 |
| G | Analytic data for the <i>anti</i> isomer.                                       | S31 |
| H | Gram synthesis of <i>syn</i> - <b>6aa</b> and its transformation                | S55 |
| I | X-Ray crystallographic analysis                                                 | S58 |
| J | Transition state for the reaction                                               | S61 |
| K | References                                                                      | S61 |
| L | NMR Spectra                                                                     | S62 |

## A. General information

Unless otherwise specified, all reactions were carried out with dry solvents in anhydrous conditions. All solvents were dried by activated molecular sieve (3 Å). All chemicals were used without further purification as commercially available unless otherwise noted. Thin-layer chromatography (TLC) was performed on silica gel plates (60F-254) using UV-light (254 and 365 nm). Flash chromatography was conducted on silica gel (200–300 mesh). <sup>1</sup>H and <sup>13</sup>C NMR spectra were recorded on a Bruker AMX400 (400 MHz) spectrometer. Chemical shifts were reported in parts per million (ppm). High resolution mass spectra (HRMS) were recorded on a Waters TOF MS GCT Premier using ESI ionization. Petroleum ether (PE) refers to the fraction with boiling point in the range 60 – 90 °C. Optical rotations were measured using a Jasco DIP-1000 polarimeter. Enantiomeric excesses were determined by HPLC analysis on a chiral stationary phase. Amino acid derived phosphine was prepared by our group. <sup>1</sup> Methyleneoxindole was prepared according the reported procedure. <sup>2</sup>

## B. Synthesis and characterization of Oxetane Morita-Baylis-Hillman carbonates **2**

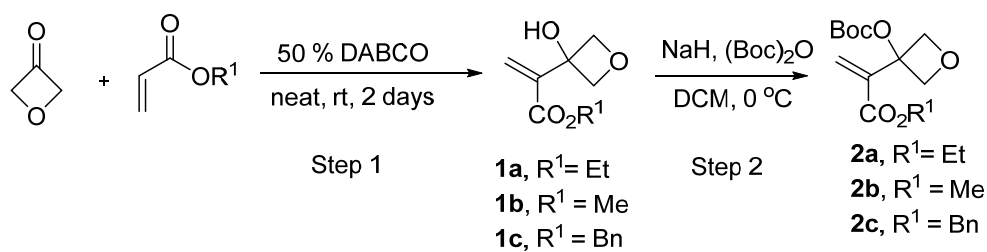

**Step 1.** To the neat mixture of 3-oxetanone (1.0g, 13.88 mmol, 1.0 equiv.) and acrylate (4.0 equiv.) was added DABCO (1.0 equiv.), then the resulting slurry was stirred vigorously at room temperature. After two days, the reaction mixture was diluted with DCM. Then the solution was washed with 4 N aqueous HCl, followed by saturated NaHCO<sub>3</sub> solution and brine. The organic layer was dried over anhydrous Na<sub>2</sub>SO<sub>4</sub>, filtered and concentrated in vacuum to get the crude product that was purified by flash column chromatography to give Morita-Baylis-Hillman alcohols **1**.

**Step 2.** To the suspension of NaH (1.0 equiv.) in DCM at 0 °C was added dropwise the DCM solution of Morita-Baylis-Hillman alcohol (1.0 equiv.) After the addition completely, the mixture was stirred at 0 °C for 10 minutes followed by the addition of DCM solution of (Boc)<sub>2</sub>O (1.1 equiv.) at the same temperature over 5 mins. The resulting solution was stirred at room temperature for 1 h. The solvent was removed under vacuum and the crude mixture was purified by column chromatography to afford oxetane Morita-Baylis-Hillman carbonate **2**.

*Ethyl 2-(3-hydroxyoxetan-3-yl)acrylate (1a)*

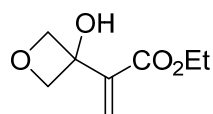

Yield, 77 %, colorless transparent liquid; <sup>1</sup>H NMR (400 MHz, CDCl<sub>3</sub>) δ 6.41 – 6.31 (m, 1H), 5.91 – 5.83 (m, 1H), 4.71 (q, *J* = 7.2 Hz, 4H), 4.22 (q, *J* = 7.1 Hz, 2H), 3.98 (s, 1H), 1.29 (t, *J* = 7.1 Hz,

3H);  $^{13}\text{C}$  NMR (101 MHz,  $\text{CDCl}_3$ ):  $\delta$  166.07, 140.08, 125.05, 81.76, 74.51, 61.34, 13.97; HRMS (ESI):  $m/z$  calcd for  $\text{C}_8\text{H}_{12}\text{O}_4$   $[\text{M}+\text{H}]^+$  = 173.0808, found = 173.0813.

*Methyl 2-(3-hydroxyoxetan-3-yl)acrylate (1b)*

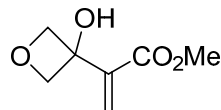

Yield: 80 %, colorless transparent liquid;  $^1\text{H}$  NMR (400 MHz,  $\text{CDCl}_3$ )  $\delta$  6.41 (s, 1H), 5.94 (s, 1H), 4.74 (q,  $J$  = 7.2 Hz, 4H), 3.81 (s, 3H), 3.77 (s, 1H);  $^{13}\text{C}$  NMR (101 MHz,  $\text{CDCl}_3$ ):  $\delta$  166.71, 139.77, 125.42, 81.70, 74.63, 52.36; HRMS (ESI):  $m/z$  calcd for  $\text{C}_7\text{H}_{10}\text{O}_4$   $[\text{M}+\text{H}]^+$  = 159.0652, found = 159.0653.

*Benzyl 2-(3-hydroxyoxetan-3-yl)acrylate (1c)*

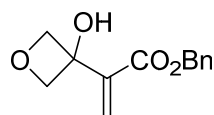

Yield: 73 %, colorless transparent liquid;  $^1\text{H}$  NMR (400 MHz,  $\text{CDCl}_3$ )  $\delta$  7.44 – 7.31 (m, 5H), 6.46 (s, 1H), 5.95 (s, 1H), 5.24 (s, 2H), 4.75 (q,  $J$  = 7.2 Hz, 4H), 3.77 (s, 1H);  $^{13}\text{C}$  NMR (101 MHz,  $\text{CDCl}_3$ ):  $\delta$  166.01, 139.88, 135.10, 128.68, 128.55, 128.17, 125.67, 81.73, 74.65, 67.14; HRMS (ESI):  $m/z$  calcd for  $\text{C}_{13}\text{H}_{14}\text{O}_4$   $[\text{M}+\text{H}]^+$  = 235.0965, found = 235.0967.

*Ethyl 2-(3-((tert-butoxycarbonyl)oxy)oxetan-3-yl)acrylate (2a)*

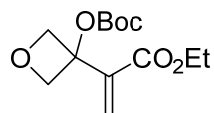

Yield: 90 %, white solid; M.p. 51.3–53.2 °C;  $^1\text{H}$  NMR (400 MHz,  $\text{CDCl}_3$ )  $\delta$  6.58 (s, 1H), 6.07 (s, 1H), 4.92 (s, 4H), 4.25 (q,  $J$  = 7.1 Hz, 2H), 1.45 (s, 9H), 1.30 (t,  $J$  = 7.1 Hz, 3H);  $^{13}\text{C}$  NMR (101 MHz,  $\text{CDCl}_3$ ):  $\delta$  164.57, 151.41, 136.57, 129.46, 83.14, 79.82, 79.30, 61.14, 58.46, 27.72, 18.42, 14.10; HRMS (ESI):  $m/z$  calcd for  $\text{C}_{13}\text{H}_{20}\text{O}_6$   $[\text{M}+\text{H}]^+$  = 273.1333, found = 273.1335.

*Methyl 2-(3-((tert-butoxycarbonyl)oxy)oxetan-3-yl)acrylate (2b)*

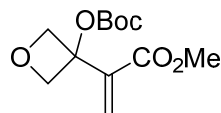

Yield: 88 %, white solid; M.p. 44.3–51.2 °C;  $^1\text{H}$  NMR (400 MHz,  $\text{CDCl}_3$ )  $\delta$  6.60 (s, 1H), 6.09 (s, 1H), 4.91 (s, 4H), 3.78 (s, 3H), 1.44 (s, 9H);  $^{13}\text{C}$  NMR (101 MHz,  $\text{CDCl}_3$ ):  $\delta$  165.02, 151.36, 136.19, 129.93, 83.19, 79.69, 79.22, 77.32, 52.16, 27.70; HRMS (ESI):  $m/z$  calcd for  $\text{C}_{12}\text{H}_{18}\text{O}_6$   $[\text{M}+\text{H}]^+$  = 259.1176, found = 259.1178;

*Benzyl 2-(3-((tert-butoxycarbonyl)oxy)oxetan-3-yl)acrylate (2c)*

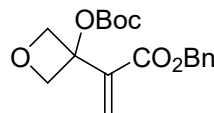

Yield: 89 %, white solid; M.p. 49.2–51.6 °C;  $^1\text{H NMR}$  (400 MHz,  $\text{CDCl}_3$ )  $\delta$  7.40–7.28 (m, 5H), 6.63 (s, 1H), 6.10 (s, 1H), 5.23 (s, 2H), 4.79 (s, 4H), 1.44 (s, 9H);  $^{13}\text{C NMR}$  (101 MHz,  $\text{CDCl}_3$ ):  $\delta$  164.29, 151.33, 136.24, 135.48, 129.99, 128.52, 128.25, 127.99, 83.05, 79.66, 79.16, 66.71, 27.64; **HRMS** (ESI):  $m/z$  calcd for  $\text{C}_{18}\text{H}_{22}\text{O}_6$   $[\text{M}+\text{H}]^+ = 335.1489$ , found = 335.1494.

### C. Optimization for the reaction.

Table S1. Optimization for *syn* isomer <sup>a</sup>

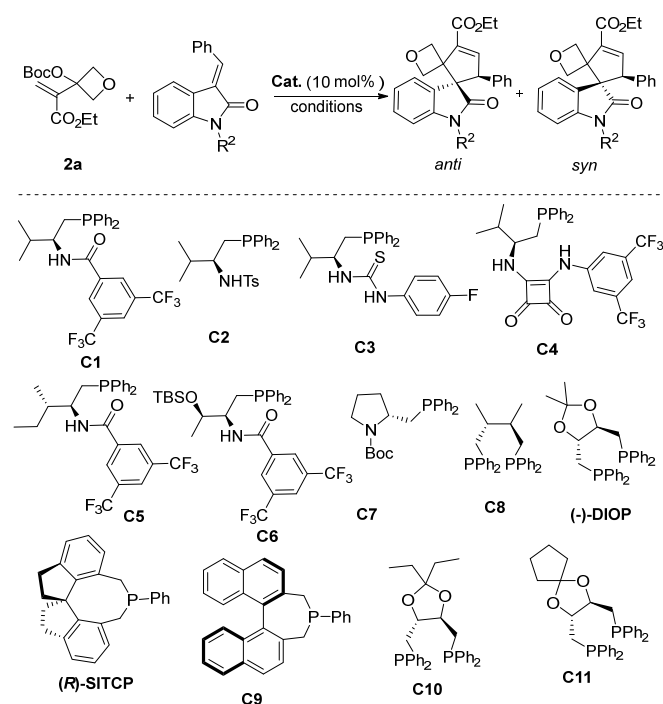

| Entry           | R <sup>2</sup> | Catalysis  | Product, yield <sup>b</sup> , ee <sup>c</sup> , dr (syn : anti) <sup>d</sup> |
|-----------------|----------------|------------|------------------------------------------------------------------------------|
| 1               | Boc, <b>3a</b> | <b>C1</b>  | <i>syn</i> - <b>4aa</b> , 52%, 36% ee, 2.9:1                                 |
| 2               | <b>3a</b>      | <b>C2</b>  | trace, -, -                                                                  |
| 3               | <b>3a</b>      | <b>C3</b>  | nr, -, -                                                                     |
| 4               | <b>3a</b>      | <b>C4</b>  | trace, -, -                                                                  |
| 5               | <b>3a</b>      | <b>C5</b>  | <i>syn</i> - <b>4aa</b> , 42%, 4%, 3.1:1                                     |
| 6               | <b>3a</b>      | <b>C6</b>  | <i>syn</i> - <b>4aa</b> , 40%, 10%, 1.8:1                                    |
| 7               | <b>3a</b>      | <b>C7</b>  | <i>syn</i> - <b>4aa</b> , 71%, 39%, 1.7:1                                    |
| 8               | <b>3a</b>      | <b>C8</b>  | <i>syn</i> - <b>4aa</b> , 51%, 34%, 3.3:1                                    |
| 9               | <b>3a</b>      | (-)-DIOP   | <i>syn</i> - <b>4aa</b> , 64%, 75%, 3.5:1                                    |
| 10              | <b>3a</b>      | (R)-SITCP  | <i>anti</i> - <b>4aa</b> , 97%, 86%, 1/7.5                                   |
| 11              | <b>3a</b>      | <b>C9</b>  | nr, -, -                                                                     |
| 12              | <b>3a</b>      | <b>C10</b> | <i>syn</i> - <b>4aa</b> , 32%, 70%, 1.2:1                                    |
| 13              | <b>3a</b>      | <b>C11</b> | <i>syn</i> - <b>4aa</b> , 30%, 70%, 3.3:1                                    |
| 14 <sup>e</sup> | <b>3a</b>      | (-)-DIOP   | <i>syn</i> - <b>4aa</b> , 49%, 89%, 5.0:1                                    |
| 15 <sup>f</sup> | <b>3a</b>      | (-)-DIOP   | <i>syn</i> - <b>4aa</b> , 74%, 86%, 4.8:1                                    |
| 16 <sup>g</sup> | <b>3a</b>      | (-)-DIOP   | <i>syn</i> - <b>4aa</b> , 45%, 67%, 2.9:1                                    |
| 17 <sup>f</sup> | Ac, <b>5a</b>  | (-)-DIOP   | <i>syn</i> - <b>6aa</b> , 89%, 95%, 5.0:1                                    |
| 18 <sup>f</sup> | Ts, <b>7a</b>  | (-)-DIOP   | <i>syn</i> - <b>8aa</b> , 97%, 60%, 4.8:1                                    |
| 19 <sup>f</sup> | Cbz, <b>9a</b> | (-)-DIOP   | <i>syn</i> - <b>10aa</b> , 96%, 78%, 5.0:1                                   |

|                   |                |          |                                           |
|-------------------|----------------|----------|-------------------------------------------|
| 20 <sup>f</sup>   | Bz, <b>11a</b> | (-)-DIOP | <i>syn</i> - <b>12aa</b> , 55%, 3%, 3.3:1 |
| 21 <sup>f</sup>   | Bn, <b>13a</b> | (-)-DIOP | nr, -, -                                  |
| 22 <sup>f,h</sup> | <b>5a</b>      | (-)-DIOP | <i>syn</i> - <b>6aa</b> , 97%, 97%, 3.1:1 |
| 23 <sup>f,i</sup> | <b>5a</b>      | (-)-DIOP | <i>syn</i> - <b>6aa</b> , 63%, 88%, 3.2:1 |
| 24 <sup>f,j</sup> | <b>5a</b>      | (-)-DIOP | <i>syn</i> - <b>6aa</b> , 82%, 95%, 5.0:1 |
| 25 <sup>f,k</sup> | <b>5a</b>      | (-)-DIOP | <i>syn</i> - <b>6aa</b> , 96%, 95%, 4.0:1 |
| 26 <sup>f,l</sup> | <b>5a</b>      | (-)-DIOP | <i>syn</i> - <b>6aa</b> , 94%, 96%, 4.2:1 |
| 27 <sup>f,m</sup> | <b>5a</b>      | (-)-DIOP | <i>syn</i> - <b>6aa</b> , 73%, 98%, 4.0:1 |
| 28 <sup>f,n</sup> | <b>5a</b>      | (-)-DIOP | nr, -, -                                  |

<sup>a</sup> Unless otherwise stated, the reaction was carried out using **2a** (0.2 mmol, 1.0 equiv), methyleneoxindole (0.3 mmol, 1.5 equiv), 10 mol% of catalyst and 1 mL toluene stirred overnight. <sup>b</sup> Isolated yield of two isomers. <sup>c</sup> The ee values was determined by HPLC analysis with a chiral stationary phase. <sup>d</sup> The dr value was determined by the mixture of crude <sup>1</sup>H NMR. <sup>e</sup> -10 °C. <sup>f</sup> 0 °C. <sup>g</sup> 40 °C. <sup>h</sup> DCM as solvent. <sup>i</sup> acetone. <sup>j</sup> MeCN. <sup>k</sup> Ea. <sup>l</sup> THF. <sup>m</sup> DMF. <sup>n</sup> MeOH.

Table S2. Optimization for *anti* isomer with (R)-SITCP <sup>a</sup>

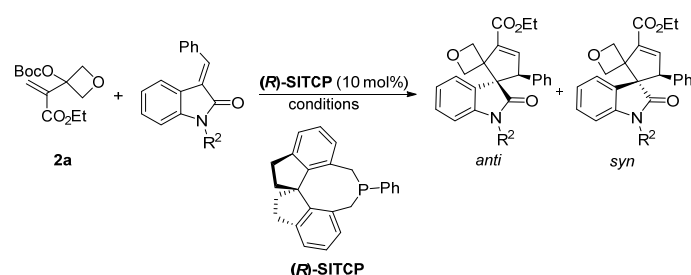

| entry           | R <sup>2</sup> | solvent       | Temp. (°C) | Product                   | yield (%) <sup>b</sup> | ee (%) <sup>c</sup> | dr    |
|-----------------|----------------|---------------|------------|---------------------------|------------------------|---------------------|-------|
| 1               | Boc, <b>3a</b> | toluene       | rt         | <i>anti</i> - <b>4aa</b>  | 97                     | 86                  | 1:7.5 |
| 2               | <b>3a</b>      | toluene       | 10         | <i>anti</i> - <b>4aa</b>  | 89                     | 87                  | 1:9   |
| 3               | <b>3a</b>      | toluene       | 0          | <i>anti</i> - <b>4aa</b>  | 82                     | 90                  | 1:11  |
| 4               | <b>3a</b>      | toluene       | -10        | <i>anti</i> - <b>4aa</b>  | 25                     | 91                  | 1:10  |
| 5               | <b>3a</b>      | DCM           | 0          | <i>anti</i> - <b>4aa</b>  | 84                     | 74                  | 1:3   |
| 6               | <b>3a</b>      | Ea            | 0          | <i>anti</i> - <b>4aa</b>  | 97                     | 83                  | 1:5   |
| 7               | <b>3a</b>      | MeCN          | 0          | <i>anti</i> - <b>4aa</b>  | 59                     | 67                  | 1:2.5 |
| 8               | <b>3a</b>      | THF           | 0          | <i>anti</i> - <b>4aa</b>  | 82                     | 86                  | 1:5.5 |
| 9               | <b>3a</b>      | ethylbenzene  | 0          | <i>anti</i> - <b>4aa</b>  | 45                     | 90                  | 1:5   |
| 10              | <b>3a</b>      | acetone       | 0          | <i>anti</i> - <b>4aa</b>  | 60                     | 78                  | 1:7   |
| 11              | <b>3a</b>      | mesitylene    | 0          | <i>anti</i> - <b>4aa</b>  | 51                     | 87                  | 1:3.5 |
| 12              | <b>3a</b>      | ortho         | 0          | <i>anti</i> - <b>4aa</b>  | 63                     | 85                  | >1:19 |
| 13              | <b>3a</b>      | chlorobenzene | 0          | <i>anti</i> - <b>4aa</b>  | 89                     | 87                  | 1:9   |
| 14              | <b>3a</b>      | bromobenzene  | 0          | <i>anti</i> - <b>4aa</b>  | 84                     | 87                  | 1:10  |
| 15              | <b>3a</b>      | chloroform    | 0          | <i>anti</i> - <b>4aa</b>  | 46                     | 89                  | 1:6   |
| 16 <sup>e</sup> | Ac, <b>5a</b>  | toluene       | 0          | <i>anti</i> - <b>6aa</b>  | 78                     | 84                  | 1:14  |
| 17 <sup>e</sup> | Ts, <b>7a</b>  | toluene       | 0          | <i>anti</i> - <b>8aa</b>  | 77                     | 81                  | 1:2.5 |
| 18 <sup>e</sup> | Cbz, <b>9a</b> | toluene       | 0          | <i>anti</i> - <b>10aa</b> | 76                     | 86                  | 1:8   |
| 19 <sup>e</sup> | Bz, <b>11a</b> | toluene       | 0          | <i>anti</i> - <b>12aa</b> | 81                     | 86                  | >1:19 |
| 20 <sup>e</sup> | Bn, <b>13a</b> | toluene       | 0          | nr                        | -                      | -                   | -     |

<sup>a</sup> Unless otherwise stated, the reaction was carried out using **2a** (0.05 mmol, 1.0 equiv), methyleneoxindole (0.075 mmol, 1.5 equiv), 10 mol% of (R)-SITCP and 1 mL toluene and stirred overnight. <sup>b</sup> Isolated yield of two isomers. <sup>c</sup> The ee values was determined by HPLC analysis with a chiral stationary phase. <sup>d</sup> The dr value was determined by the mixture of crude product <sup>1</sup>H NMR. <sup>e</sup> The reaction scale was doubled.

#### D. General procedure for the synthesis of *syn* isomer with (-)-DIOP

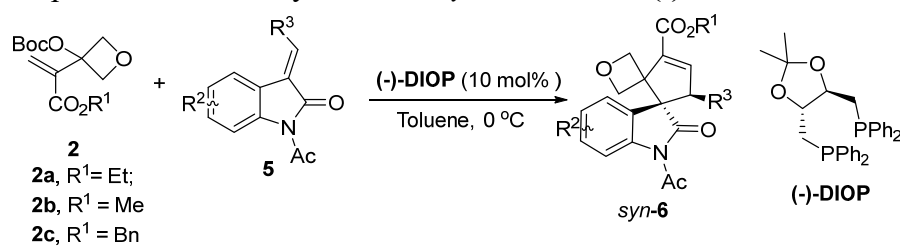

To the solution of oxetane MBH carbonate **2** (0.2 mmol, 1 eq.) and **5** (0.3 mmol, 1.5 eq.) in anhydrous toluene (2 mL) at 0 °C was added (-)-DIOP (10.0 mg, 0.02 mmol, 0.1 eq.), and the resulting mixture was stirred overnight. When MBH carbonate **2** was consumed monitored by TLC, the reaction mixture was purified directly by flash column chromatography (hexane/ ethyl acetate = 8/1) to afford a mixture of two isomers. Further purification was carried out via flash column chromatography to get pure *syn* isomer.

E. Analytic data for the *syn* isomer.

*Ethyl*

(3*R*,5'*S*)-1-acetyl-2-oxo-5'-phenyldispiro[indoline-3,1'-cyclopentane-2',3''-oxetan]-3'-ene-3'-carboxylate (*syn-6aa*)

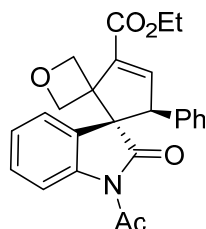

According to the general procedure to afford the mixture of two isomers (74.3 mg, 92% yield), and the title compound was further purified as a white solid; M.p. 143.3–146.2 °C;  $[\alpha]^{25}_{\text{D}} = +62.403$  (c 0.26, CHCl<sub>3</sub>); <sup>1</sup>H NMR (400 MHz, CDCl<sub>3</sub>) δ 7.69 (d, *J* = 2.2 Hz, 1H), 7.40 (dd, *J* = 8.3, 2.2 Hz, 1H), 6.77 (dd, *J* = 4.4, 2.2 Hz, 1H), 6.62 (d, *J* = 8.3 Hz, 1H), 4.25 (q, *J* = 7.2 Hz, 2H), 4.20 (dd, *J* = 5.4, 2.8 Hz, 1H), 3.69 – 3.62 (m, 1H), 3.17 (dd, *J* = 22.1, 6.0 Hz, 2H), 1.33 (dd, *J* = 9.0, 5.3 Hz, 3H), 1.30 (s, 9H); <sup>13</sup>C NMR (101 MHz, CDCl<sub>3</sub>): δ 179.3, 175.7, 163.5, 150.4, 139.2, 136.1, 132.3, 132.2, 130.7, 129.4, 124.3, 61.2, 54.1, 43.2, 35.8, 31.5, 14.2; HRMS (ESI): *m/z* calcd for C<sub>25</sub>H<sub>24</sub>NO<sub>5</sub> [M+H]<sup>+</sup> = 418.1649, found = 418.1653; HPLC: The ee value was 92%, *t<sub>R</sub>* (major) = 32.23 min, *t<sub>R</sub>* (minor) = 31.32 min (Chiralpak IE 3, λ = 254 nm, 5% *i*-PrOH/hexane, flow rate = 1.0 mL/min).

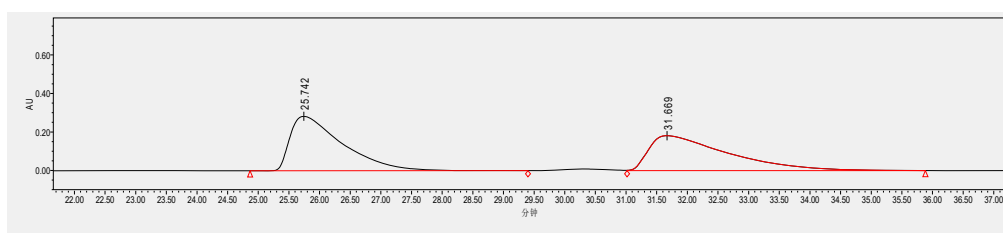

| peak | Retention time (min) | Area (μV*s) | Area (%) | Height |
|------|----------------------|-------------|----------|--------|
| 1    | 25.742               | 16776056    | 50.93    | 283126 |
| 2    | 31.669               | 16160210    | 49.07    | 181588 |

Racemic *syn-6aa*

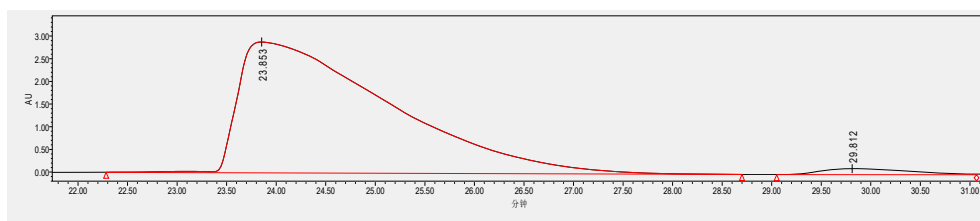

| peak | Retention time (min) | Area (μV*s) | Area (%) | Height  |
|------|----------------------|-------------|----------|---------|
| 1    | 23.853               | 305961721   | 97.40    | 2885411 |
| 2    | 29.812               | 8163394     | 2.60     | 131712  |

Enantiomerically enriched *syn-6aa*

Methyl

(3*R*,5'*S*)-1-acetyl-2-oxo-5'-phenyldispiro[indoline-3,1'-cyclopentane-2',3''-oxetan]-3'-ene-3'-carboxylate (*syn*-6*ba*)

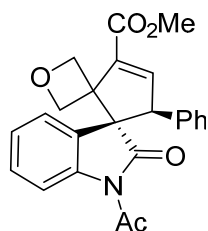

According to the general procedure to afford the mixture of two isomers (53.2 mg, 66% yield), and the title compound was further purified as a white solid; M.p. 133.3 – 136.2 °C;  $[\alpha]_D^{25} = +140.152$  (c 0.26, CHCl<sub>3</sub>); <sup>1</sup>H NMR (400 MHz, CDCl<sub>3</sub>) δ 8.07 (d, *J* = 8.2 Hz, 1H), 7.21 (d, *J* = 2.2 Hz, 1H), 7.15 (s, 1H), 7.12 – 7.08 (m, 3H), 6.95 – 6.84 (m, 3H), 6.74 (d, *J* = 7.6 Hz, 1H), 5.14 (d, *J* = 6.8 Hz, 1H), 5.04 (d, *J* = 7.0 Hz, 1H), 4.98 (d, *J* = 6.8 Hz, 1H), 4.62 (d, *J* = 2.1 Hz, 1H), 3.95 (s, 3H), 3.89 (d, *J* = 7.0 Hz, 1H), 2.77 (s, 3H); <sup>13</sup>C NMR (101 MHz, CDCl<sub>3</sub>): δ 177.80, 170.51, 163.85, 145.60, 140.00, 137.66, 135.99, 129.07, 128.43, 127.89, 127.77, 125.96, 124.49, 124.09, 116.34, 76.19, 75.44, 64.71, 58.83, 57.56, 52.06, 26.98; HRMS (ESI): *m/z* calcd for C<sub>24</sub>H<sub>22</sub>NO<sub>5</sub> [M+H]<sup>+</sup> = 404.1492, found = 404.1496; HPLC: The ee value was 92%, *t<sub>R</sub>* (major) = 16.5 min, *t<sub>R</sub>* (minor) = 19.5 min (Chiralpak IE 3, λ = 254 nm, 7% *i*-PrOH/hexane, flow rate = 1.0 mL/min).

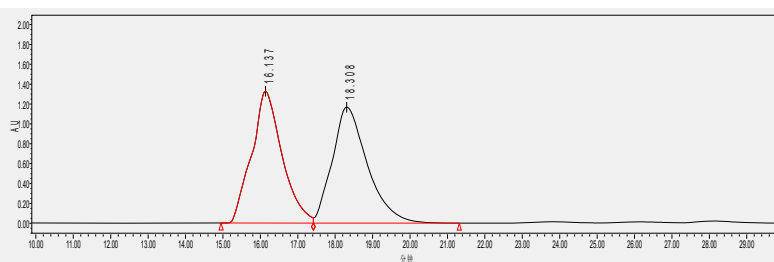

| peak | Retention time (min) | Area (μV*s) | Area (%) | Height  |
|------|----------------------|-------------|----------|---------|
| 1    | 16.137               | 75119804    | 49.62    | 1327467 |
| 2    | 18.308               | 76279583    | 50.38    | 1166437 |

Racemic *syn*-6*ba*

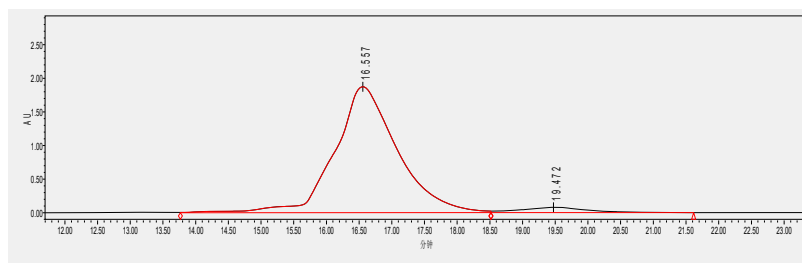

| peak | Retention time (min) | Area (μV*s) | Area (%) | Height  |
|------|----------------------|-------------|----------|---------|
| 1    | 16.557               | 124482420   | 95.76    | 1873461 |
| 2    | 19.472               | 5515520     | 4.24     | 79705   |

Enantiomerically enriched *syn*-6*ba*



## Benzyl

(3*R*,5'*S*)-1-acetyl-2-oxo-5'-phenyldispiro[indoline-3,1'-cyclopentane-2',3''-oxetan]-3'-ene-3'-carboxylate (**syn-6ca**)

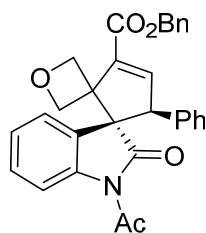

According to the general procedure to afford the mixture of two isomers (84.3 mg, 88% yield), and the title compound was further purified as a white solid; M.p. 120.1–123.8 °C;  $[\alpha]_D^{25} = +25.108$  (c 0.23, CHCl<sub>3</sub>); <sup>1</sup>H NMR (400 MHz, CDCl<sub>3</sub>) δ 8.07 (d, *J* = 8.2 Hz, 1H), 7.49 (d, *J* = 7.1 Hz, 2H), 7.46 – 7.34 (m, 3H), 7.25 (d, *J* = 2.1 Hz, 1H), 7.15 (t, *J* = 7.9 Hz, 1H), 7.12 – 7.07 (m, 3H), 6.92 (d, *J* = 7.6 Hz, 1H), 6.87 (dd, *J* = 6.4, 2.8 Hz, 2H), 6.75 (d, *J* = 7.6 Hz, 1H), 5.40 (q, *J* = 12.4 Hz, 2H), 5.16 (d, *J* = 6.8 Hz, 1H), 5.06 (d, *J* = 7.0 Hz, 1H), 5.00 (d, *J* = 6.8 Hz, 1H), 4.62 (d, *J* = 2.0 Hz, 1H), 3.90 (d, *J* = 7.0 Hz, 1H), 2.77 (s, 3H); <sup>13</sup>C NMR (101 MHz, CDCl<sub>3</sub>): δ 177.8, 170.5, 163.2, 145.8, 139.9, 137.6, 135.9, 135.5, 129.0, 128.6, 128.4, 128.4, 128.3, 127.9, 127.7, 125.9, 124.5, 124.1, 116.3, 76.2, 75.4, 66.8, 64.7, 58.8, 57.6, 26.9; HRMS (ESI): *m/z* calcd for C<sub>30</sub>H<sub>26</sub>NO<sub>5</sub> [M+H]<sup>+</sup> = 480.1805, found = 480.1811; HPLC: The ee value was 82%, *t<sub>R</sub>* (major) = 28.4 min, *t<sub>R</sub>* (minor) = 22.9 min (Chiralpak IE 3, λ = 254 nm, 20% *i*-PrOH/hexane, flow rate = 1.0 mL/min).

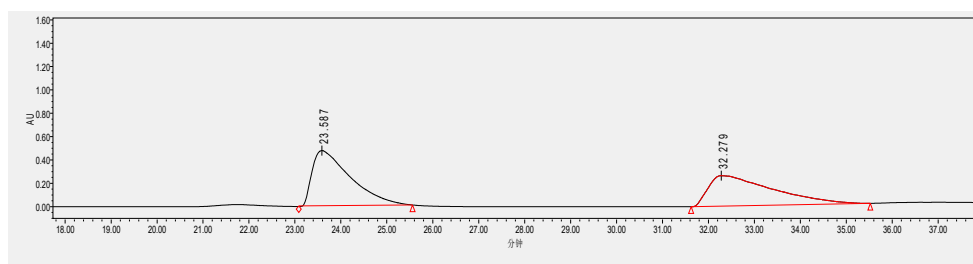

| peak | Retention time (min) | Area (μV*s) | Area (%) | Height |
|------|----------------------|-------------|----------|--------|
| 1    | 23.587               | 27277878    | 51.92    | 471821 |
| 2    | 32.279               | 25260139    | 48.08    | 260961 |

Racemic **syn-6ca**

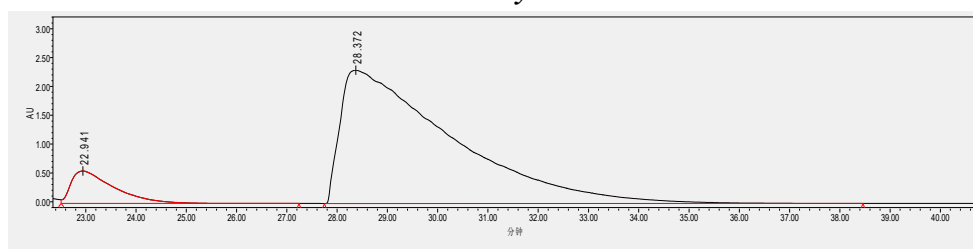

| peak | Retention time (min) | Area (μV*s) | Area (%) | Height  |
|------|----------------------|-------------|----------|---------|
| 1    | 22.941               | 33452514    | 8.60     | 562661  |
| 2    | 28.372               | 355745735   | 91.40    | 2311652 |

Enantiomerically enriched **syn-6ca**

*1-(tert-butyl) 3'-ethyl (3R,5'S)-2-oxo-5'-phenylspiro[indoline-3,1'-cyclopentane-2',3''-oxetan]-3'-ene-1,3'-dicarboxylate (syn-4aa)*

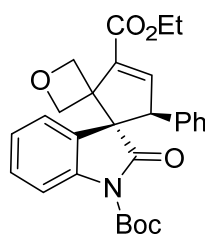

According to the general procedure to afford the mixture of two isomers (60.8 mg, 64% yield), and the title compound was further purified as a white solid; M.p. 169.4 – 174.1°C;  $[\alpha]_D^{25} = +39.303$  (c 0.20, CHCl<sub>3</sub>); <sup>1</sup>H NMR (400 MHz, CDCl<sub>3</sub>) δ 7.66 (d, *J* = 8.2 Hz, 1H), 7.17 (d, *J* = 2.2 Hz, 1H), 7.16 – 7.07 (m, 4H), 6.89 (dd, *J* = 6.3, 2.9 Hz, 2H), 6.84 (t, *J* = 7.6 Hz, 1H), 6.63 (d, *J* = 7.5 Hz, 1H), 5.16 (d, *J* = 6.8 Hz, 1H), 4.98 (t, *J* = 6.7 Hz, 2H), 4.57 (d, *J* = 2.1 Hz, 1H), 4.47 – 4.33 (m, 2H), 3.99 (d, *J* = 6.9 Hz, 1H), 1.65 (s, 9H), 1.42 (t, *J* = 7.1 Hz, 3H); <sup>13</sup>C NMR (101 MHz, CDCl<sub>3</sub>): δ 175.4, 163.5, 148.7, 145.1, 139.7, 138.2, 136.3, 128.8, 128.3, 128.1, 127.6, 125.7, 124.5, 123.6, 114.8, 84.7, 76.3, 75.7, 64.4, 61.0, 58.1, 57.7, 28.1, 14.2; HRMS (ESI): *m/z* calcd for C<sub>28</sub>H<sub>30</sub>NO<sub>6</sub> [M+H]<sup>+</sup> = 476.2068, found = 476.2074; HPLC: The ee value was 86%, *t<sub>R</sub>* (major) = 38.5 min, *t<sub>R</sub>* (minor) = 32.6 min (Chiralpak IE 3, λ = 254 nm, 8% *i*-PrOH/hexane, flow rate = 1.0 mL/min).

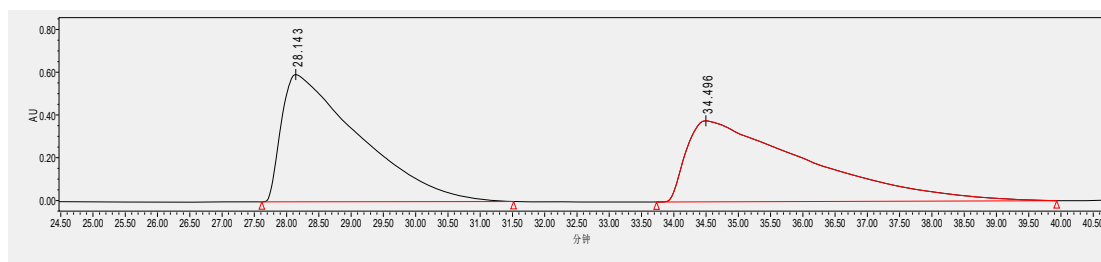

| peak | Retention time (min) | Area (μV*s) | Area (%) | Height |
|------|----------------------|-------------|----------|--------|
| 1    | 28.143               | 49728326    | 50.23    | 595721 |
| 2    | 34.496               | 49263728    | 49.77    | 378667 |

Racemic *syn-4aa*

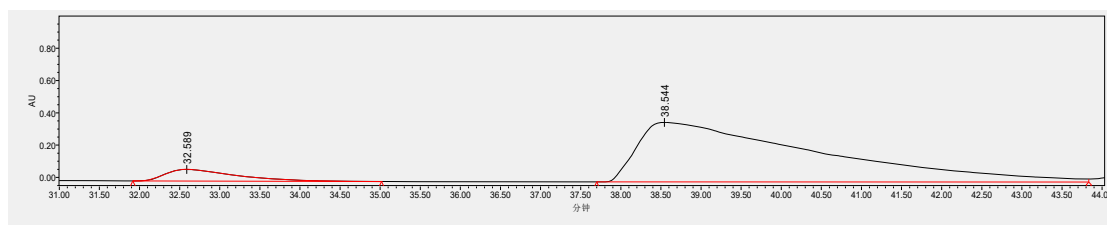

| peak | Retention time (min) | Area (μV*s) | Area (%) | Height |
|------|----------------------|-------------|----------|--------|
| 1    | 32.589               | 4352545     | 7.07     | 71689  |
| 2    | 38.544               | 57244772    | 92.93    | 368652 |

Enantiomerically enriched *syn-4aa*

*Ethyl (3R,5'S)-2-oxo-5'-phenyl-1-tosylspiro[indoline-3,1'-cyclopentane-2',3''-oxetan]-3'-ene-3'-carboxylate (syn-8aa)*

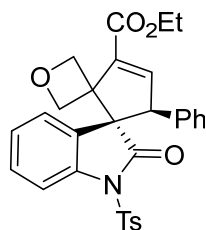

According to the general procedure to afford the mixture of two isomers (102.6 mg, 97% yield), and the title compound was further purified as a white solid; M.p. 186.3 – 189.1 °C;  $[\alpha]_D^{25} = -4.911$  (c 0.22, CHCl<sub>3</sub>); <sup>1</sup>H NMR (400 MHz, CDCl<sub>3</sub>) δ 7.98 (d, *J* = 8.1 Hz, 2H), 7.84 (d, *J* = 8.3 Hz, 1H), 7.36 (d, *J* = 8.1 Hz, 2H), 7.18 (s, 1H), 7.10 (s, 1H), 7.04 (s, 1H), 6.93 (t, *J* = 7.5 Hz, 2H), 6.85 (s, 1H), 6.59 (d, *J* = 7.7 Hz, 2H), 6.55 (d, *J* = 7.6 Hz, 1H), 4.90 (d, *J* = 6.9 Hz, 1H), 4.79 (d, *J* = 6.9 Hz, 1H), 4.73 (d, *J* = 6.9 Hz, 1H), 4.43 (s, 1H), 4.38 (dd, *J* = 7.0, 4.8 Hz, 2H), 3.90 (d, *J* = 6.9 Hz, 1H), 2.47 (s, 3H), 1.40 (t, *J* = 7.1 Hz, 3H); <sup>13</sup>C NMR (101 MHz, CDCl<sub>3</sub>): δ 174.7, 171.9, 145.9, 143.8, 139.6, 134.6, 133.1, 131.0, 129.9, 129.8, 128.1, 127.9, 127.8, 126.9, 126.2, 125.8, 125.1, 113.9, 76.7, 75.5, 66.4, 61.5, 56.8, 56.7, 21.7, 14.2; HRMS (ESI): *m/z* calcd for C<sub>30</sub>H<sub>28</sub>NO<sub>6</sub>S [M+H]<sup>+</sup> = 530.1632, found = 530.1638; HPLC: The ee value was 60%, *t<sub>R</sub>* (major) = 19.9 min, *t<sub>R</sub>* (minor) = 12.6 min (Chiralpak IE 3, λ = 254 nm, 20% *i*-PrOH/hexane, flow rate = 1.0 mL/min).

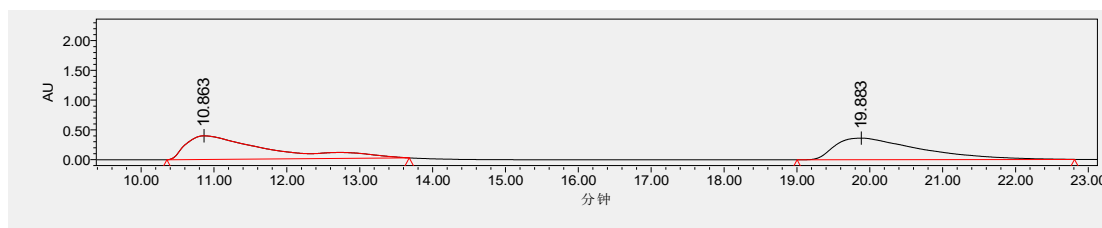

| peak | Retention time (min) | Area (μV*s) | Area (%) | Height |
|------|----------------------|-------------|----------|--------|
| 1    | 10.863               | 31317111    | 51.62    | 397861 |
| 2    | 19.883               | 29348972    | 48.38    | 363360 |

Racemic *syn-8aa*

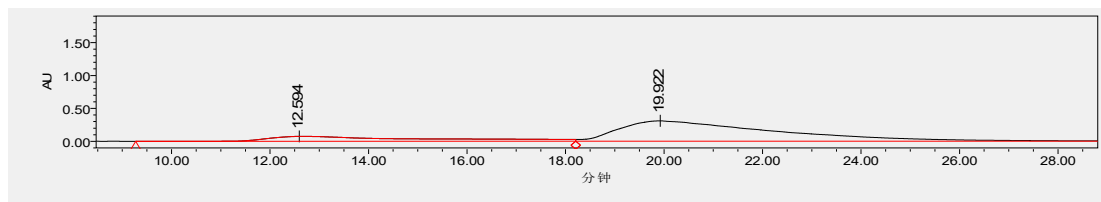

| peak | Retention time (min) | Area (μV*s) | Area (%) | Height |
|------|----------------------|-------------|----------|--------|
| 1    | 12.594               | 17343585    | 20.20    | 75359  |
| 2    | 19.922               | 68523151    | 79.80    | 309650 |

Enantiomerically enriched *syn-8aa*

1-benzyl 3'-ethyl (3*R*,5'*S*)-2-oxo-5'-phenyldispiro[indoline-3,1'-cyclopentane-2',3''-oxetan]-3'-ene-1,3'-dicarboxylate (*syn*-10aa)

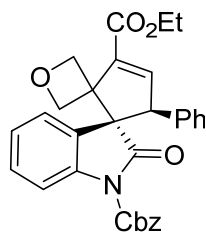

According to the general procedure to afford the mixture of two isomers (97.8 mg, 96% yield), and the title compound was further purified as a yellow liquid;  $[\alpha]^{25}_{\text{D}} = +41.584$  (c 0.20,  $\text{CHCl}_3$ );  $^1\text{H NMR}$  (400 MHz,  $\text{CDCl}_3$ )  $\delta$  7.74 (d,  $J = 8.2$  Hz, 1H), 7.54 (d,  $J = 7.4$  Hz, 2H), 7.49 – 7.32 (m, 3H), 7.18 (d,  $J = 1.2$  Hz, 1H), 7.13 (t,  $J = 7.9$  Hz, 1H), 7.08 (d,  $J = 4.4$  Hz, 3H), 6.88 (t,  $J = 7.3$  Hz, 3H), 6.69 (d,  $J = 7.6$  Hz, 1H), 5.47 (q,  $J = 12.4$  Hz, 2H), 5.18 (d,  $J = 6.8$  Hz, 1H), 5.00 (dd,  $J = 13.1, 6.9$  Hz, 2H), 4.61 (s, 1H), 4.48 – 4.34 (m, 2H), 3.95 (d,  $J = 6.9$  Hz, 1H), 1.42 (t,  $J = 7.1$  Hz, 3H);  $^{13}\text{C NMR}$  (101 MHz,  $\text{CDCl}_3$ ):  $\delta$  175.16, 163.47, 150.38, 145.12, 139.18, 138.10, 136.13, 134.83, 128.99, 128.70, 128.53, 128.33, 128.11, 127.99, 127.65, 125.85, 124.41, 124.05, 114.97, 76.27, 75.65, 68.81, 64.60, 61.06, 58.48, 57.72, 14.27; **HRMS** (ESI):  $m/z$  calcd for  $\text{C}_{31}\text{H}_{28}\text{NO}_6$   $[\text{M}+\text{H}]^+ = 510.1911$ , found = 510.1919; **HPLC**: The ee value was 78%,  $t_{\text{R}}$  (major) = 28.3 min,  $t_{\text{R}}$  (minor) = 19.2 min (Chiralpak IE 3,  $\lambda = 254$  nm, 13% *i*-PrOH/hexane, flow rate = 1.0 mL/min).

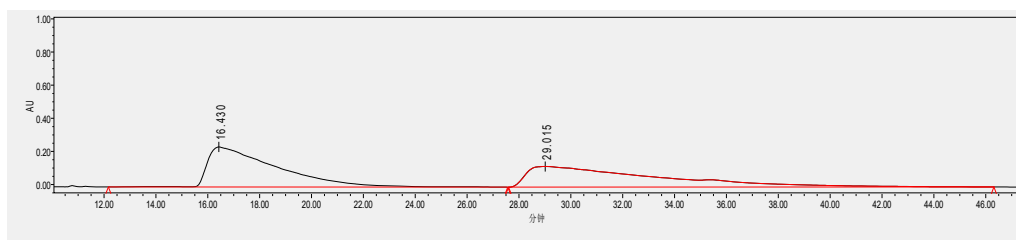

| peak | Retention time (min) | Area ( $\mu\text{V}\cdot\text{s}$ ) | Area (%) | Height |
|------|----------------------|-------------------------------------|----------|--------|
| 1    | 16.430               | 44521843                            | 50.64    | 241725 |
| 2    | 29.015               | 43391353                            | 49.36    | 124216 |

Racemic *syn*-10aa

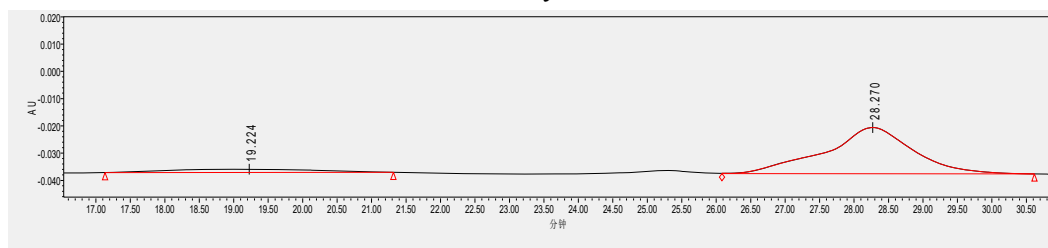

| peak | Retention time (min) | Area ( $\mu\text{V}\cdot\text{s}$ ) | Area (%) | Height |
|------|----------------------|-------------------------------------|----------|--------|
| 1    | 19.224               | 181540                              | 10.81    | 1216   |
| 2    | 28.270               | 1498163                             | 89.19    | 16948  |

Enantiomerically enriched *syn*-10aa

*Ethyl (3R,5'S)-1-benzoyl-2-oxo-5'-phenyldispiro[indoline-3,1'-cyclopentane-2',3''-oxetan]-3'-ene-3'-carboxylate (syn-12aa)*

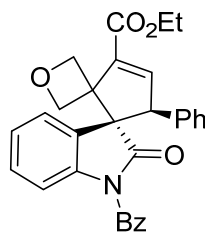

According to the general procedure to afford the mixture of two isomers (43.1 mg, 45% yield), and the title compound was further purified as a yellow solid; M.p. 75 – 78 °C;  $[\alpha]_D^{25} = +11.500$  (c 0.20, CHCl<sub>3</sub>); <sup>1</sup>H NMR (400 MHz, CDCl<sub>3</sub>) δ 7.89 – 7.84 (m, 2H), 7.64 (dd, *J* = 16.1, 7.8 Hz, 2H), 7.51 (t, *J* = 7.7 Hz, 2H), 7.23 (d, *J* = 2.1 Hz, 1H), 7.21 – 7.15 (m, 1H), 7.13 (t, *J* = 6.1 Hz, 3H), 7.00 – 6.88 (m, 4H), 5.20 (d, *J* = 7.0 Hz, 1H), 5.13 (d, *J* = 6.7 Hz, 1H), 5.02 (d, *J* = 6.8 Hz, 1H), 4.65 (d, *J* = 1.9 Hz, 1H), 4.49 – 4.31 (m, 2H), 3.93 (d, *J* = 7.0 Hz, 1H), 1.43 (t, *J* = 7.1 Hz, 2H); <sup>13</sup>C NMR (101 MHz, CDCl<sub>3</sub>) δ 176.61, 169.10, 163.50, 145.75, 140.08, 137.20, 136.22, 133.96, 133.11, 129.52, 129.02, 128.45, 128.42, 128.05, 127.68, 126.58, 124.40, 124.26, 114.50, 75.93, 75.40, 65.30, 61.09, 59.70, 56.33, 14.26; HRMS (ESI): *m/z* calcd for C<sub>30</sub>H<sub>25</sub>NO<sub>5</sub> [M+H]<sup>+</sup> = 480.1805, found = 480.1803. HPLC: The ee value was 8%, *t<sub>R</sub>* (major) = 17.3 min, *t<sub>R</sub>* (minor) = 39.7 min (Chiralpak IE 3, λ = 254 nm, 20% *i*-PrOH/hexane, flow rate = 1.0 mL/min).

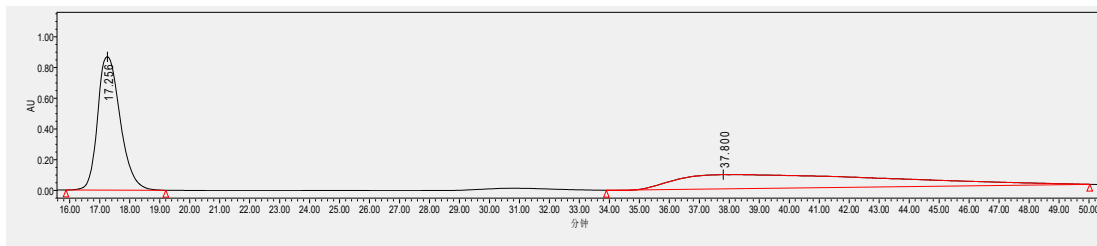

| peak | Retention time (min) | Area (μV*s) | Area (%) | Height |
|------|----------------------|-------------|----------|--------|
| 1    | 17.256               | 45417154    | 49.89    | 868245 |
| 2    | 37.800               | 45625824    | 50.11    | 92617  |

Racemic *syn-12aa*

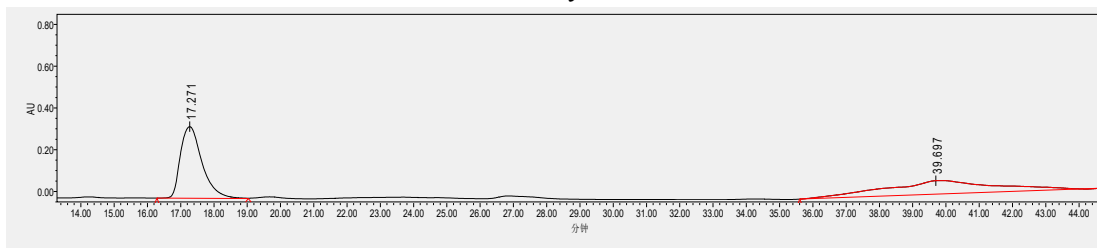

| peak | Retention time (min) | Area (μV*s) | Area (%) | Height |
|------|----------------------|-------------|----------|--------|
| 1    | 17.271               | 15508093    | 51.53    | 342798 |
| 2    | 39.697               | 14588214    | 48.47    | 64430  |

Enantiomerically enriched *syn-12aa*

Ethyl

(3*R*,5'*S*)-1-acetyl-2-oxo-5'-(*o*-tolyl)dispiro[indoline-3,1'-cyclopentane-2',3''-oxetan]-3'-ene-3'-carboxylate (*syn*-6ab)

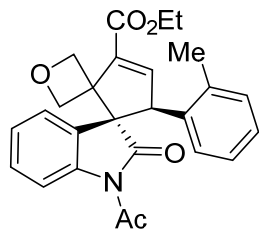

According to the general procedure to afford the mixture of two isomers (70.7 mg, 76% yield), and the title compound was further purified as a white solid; M.p. 133.1 – 140.5 °C;  $[\alpha]_D^{25} = +323.176$  (c 0.23, CHCl<sub>3</sub>); **<sup>1</sup>H NMR** (400 MHz, CDCl<sub>3</sub>) δ 8.21 (d, *J* = 8.2 Hz, 1H), 8.13 (d, *J* = 8.2 Hz, 1H), 7.35 (s, 1H), 7.24 (d, *J* = 7.9 Hz, 1H), 7.16 – 7.09 (m, 3H), 7.06 (d, *J* = 2.3 Hz, 1H), 6.99 – 6.93 (m, 1H), 6.93 – 6.87 (m, 1H), 6.83 (t, *J* = 7.6 Hz, 1H), 6.73 – 6.64 (m, 1H), 6.34 (d, *J* = 8.5 Hz, 1H), 5.99 (d, *J* = 7.7 Hz, 1H), 5.67 (t, *J* = 7.2 Hz, 1H), 5.34 (t, *J* = 6.3 Hz, 1H), 5.16 (d, *J* = 6.8 Hz, 1H), 5.03 (t, *J* = 5.4 Hz, 1H), 4.92 (d, *J* = 6.8 Hz, 1H), 4.67 (s, 1H), 4.55 (dd, *J* = 7.9, 4.7 Hz, 2H), 4.49 (d, *J* = 6.8 Hz, 1H), 4.42 (dt, *J* = 14.3, 5.4 Hz, 4H), 2.70 (d, *J* = 5.7 Hz, 4H), 1.42 (t, *J* = 7.0 Hz, 4H); **<sup>13</sup>C NMR** (101 MHz, CDCl<sub>3</sub>): δ 178.8, 170.4, 163.4, 145.3, 140.4, 138.4, 137.4, 134.8, 130.8, 129.1, 128.0, 127.7, 126.1, 125.9, 124.8, 124.3, 116.1, 76.7, 75.9, 62.7, 60.9, 57.6, 53.3, 26.9, 19.1, 14.2; **HRMS** (ESI): *m/z* calcd for C<sub>26</sub>H<sub>26</sub>NO<sub>5</sub> [M+H]<sup>+</sup> = 432.1805, found = 432.1811; **HPLC**: The ee value was 84%, *t<sub>R</sub>* (major) = 25.1 min, *t<sub>R</sub>* (minor) = 18.9 min (Chiralpak ID 3, λ = 254 nm, 20% *i*-PrOH/hexane, flow rate = 1.0 mL/min).

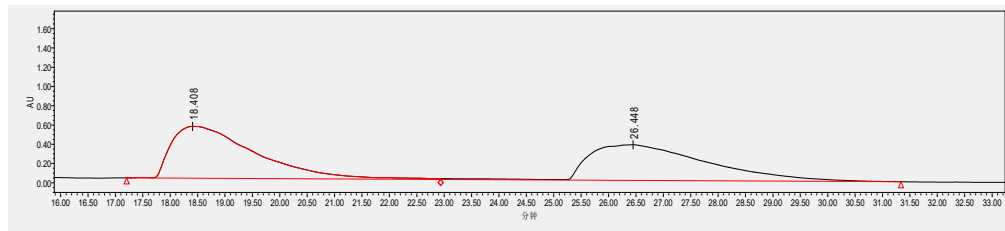

| peak | Retention time (min) | Area (μV*s) | Area (%) | Height |
|------|----------------------|-------------|----------|--------|
| 1    | 18.408               | 57186862    | 50.70    | 538616 |
| 2    | 26.448               | 55618626    | 49.30    | 369719 |

Racemic *syn*-6ab

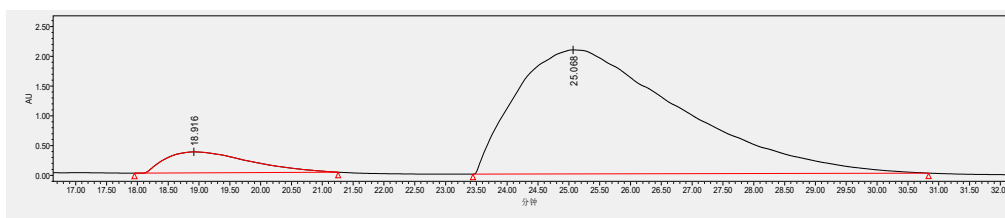

| peak | Retention time (min) | Area (μV*s) | Area (%) | Height  |
|------|----------------------|-------------|----------|---------|
| 1    | 18.916               | 33477362    | 7.95     | 353184  |
| 2    | 25.068               | 387496043   | 92.05    | 2084001 |

Enantiomerically enriched *syn*-6ab

Ethyl

(3*R*,5'*S*)-1-acetyl-2-oxo-5'-(*p*-tolyl)dispiro[indoline-3,1'-cyclopentane-2',3''-oxetan]-3'-ene-3'-carboxylate (*syn*-6ac)

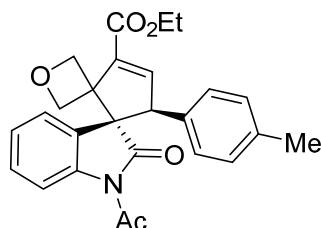

According to the general procedure to afford the mixture of two isomers (52.3 mg, 61% yield), and the title compound was further purified as a white solid; M.p. 143.9 – 149.6 °C;  $[\alpha]_D^{25} = +181.070$  (c 0.24, CHCl<sub>3</sub>); <sup>1</sup>H NMR (400 MHz, CDCl<sub>3</sub>) δ 8.08 (d, J = 8.2 Hz, 1H), 7.19 – 7.13 (m, 2H), 6.97 – 6.87 (m, 3H), 6.80 – 6.73 (m, 3H), 5.13 (d, J = 6.7 Hz, 1H), 5.04 (d, J = 7.0 Hz, 1H), 4.98 (d, J = 6.7 Hz, 1H), 4.57 (d, J = 2.2 Hz, 1H), 4.41 (qd, J = 7.1, 5.1 Hz, 2H), 3.88 (d, J = 6.9 Hz, 1H), 2.76 (s, 3H), 2.19 (s, 3H), 1.42 (t, J = 7.1 Hz, 3H); <sup>13</sup>C NMR (101 MHz, CDCl<sub>3</sub>): δ 177.95, 170.66, 163.58, 145.73, 140.10, 137.75, 137.52, 132.98, 129.17, 129.06, 127.90, 126.22, 124.56, 124.22, 116.38, 76.33, 75.54, 64.85, 61.15, 58.92, 57.32, 27.06, 21.04, 14.35; HRMS (ESI): m/z calcd for C<sub>26</sub>H<sub>26</sub>NO<sub>5</sub> [M+H]<sup>+</sup> = 432.1805, found = 432.1812; HPLC: The ee value was 84%, t<sub>R</sub> (major) = 11.1 min, t<sub>R</sub> (minor) = 9.7 min (Chiralpak IA 3, λ = 254 nm, 10% *i*-PrOH/hexane, flow rate = 1.0 mL/min).

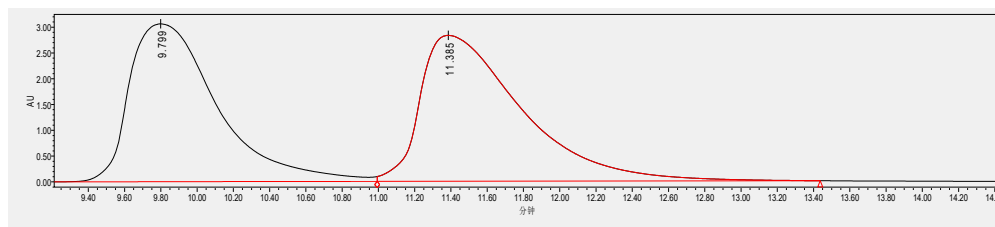

| peak | Retention time (min) | Area (μV*s) | Area (%) | Height  |
|------|----------------------|-------------|----------|---------|
| 1    | 9.799                | 103059717   | 48.47    | 3061244 |
| 2    | 11.385               | 109583633   | 51.53    | 2830035 |

Racemic *syn*-6ac

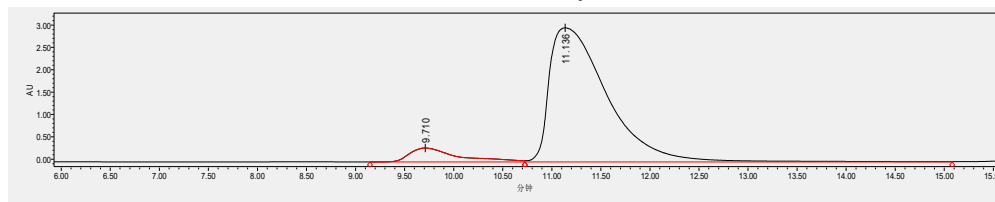

| peak | Retention time (min) | Area (μV*s) | Area (%) | Height  |
|------|----------------------|-------------|----------|---------|
| 1    | 9.710                | 10568909    | 7.91     | 310805  |
| 2    | 11.136               | 123126037   | 92.09    | 2999805 |

Enantiomerically enriched *syn*-6ac

*Ethyl (3R,5'S)-1-acetyl-5'-(4-methoxyphenyl)-2-oxodispiro[indoline-3,1'-cyclopentane-2',3''-oxetan]-3'-ene-3'-carboxylate (syn-6ad)*

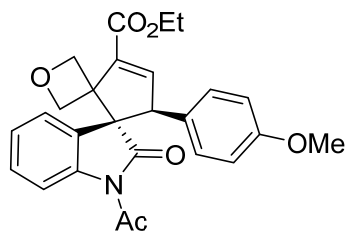

According to the general procedure to afford the mixture of two isomers (60.5 mg, 68% yield), and the title compound was further purified as a white solid; M.p. 146.5 – 151.3 °C;  $[\alpha]_D^{25} = -103.318$  (c 0.21, CHCl<sub>3</sub>); <sup>1</sup>H NMR (400 MHz, CDCl<sub>3</sub>) δ 8.09 (d, *J* = 8.2 Hz, 1H), 7.20 – 7.12 (m, 2H), 6.93 (t, *J* = 7.6 Hz, 1H), 6.79 (d, *J* = 8.3 Hz, 2H), 6.75 (d, *J* = 7.6 Hz, 1H), 6.63 (d, *J* = 8.4 Hz, 2H), 5.11 (d, *J* = 6.7 Hz, 1H), 5.04 (d, *J* = 6.9 Hz, 1H), 4.98 (d, *J* = 6.7 Hz, 1H), 4.54 (s, 1H), 4.49 – 4.33 (m, 2H), 3.90 (d, *J* = 6.9 Hz, 1H), 3.68 (s, 3H), 2.76 (s, 3H), 1.42 (t, *J* = 7.1 Hz, 3H); <sup>13</sup>C NMR (101 MHz, CDCl<sub>3</sub>): δ 177.9, 170.5, 163.5, 158.9, 145.7, 140.0, 137.6, 129.1, 129.0, 127.9, 126.1, 124.5, 124.2, 116.3, 113.8, 76.3, 75.5, 64.8, 61.1, 58.7, 56.9, 55.1, 26.9, 14.3 (cm<sup>-1</sup>); HRMS (ESI): *m/z* calcd for C<sub>26</sub>H<sub>26</sub>NO<sub>6</sub> [M+H]<sup>+</sup> = 448.1755, found = 448.1759; HPLC: The ee value was 82%, *t<sub>R</sub>* (major) = 16.2 min, *t<sub>R</sub>* (minor) = 13.8 min (Chiralpak IA 3, λ = 254 nm, 10% *i*-PrOH/hexane, flow rate = 1.0 mL/min).

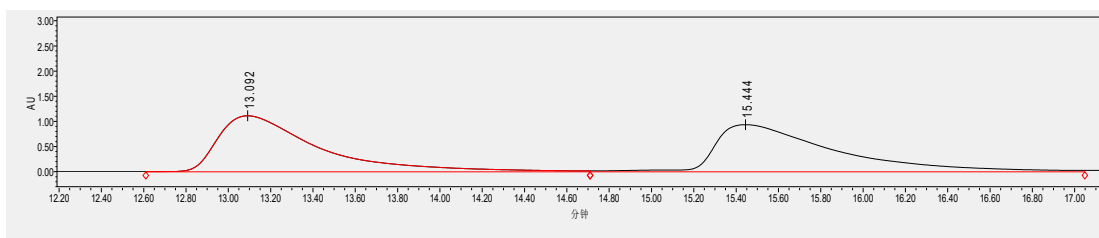

| peak | Retention time (min) | Area (μV*s) | Area (%) | Height  |
|------|----------------------|-------------|----------|---------|
| 1    | 13.092               | 36658899    | 49.92    | 1114561 |
| 2    | 15.444               | 36780674    | 50.08    | 936904  |

Racemic *syn*-6ad

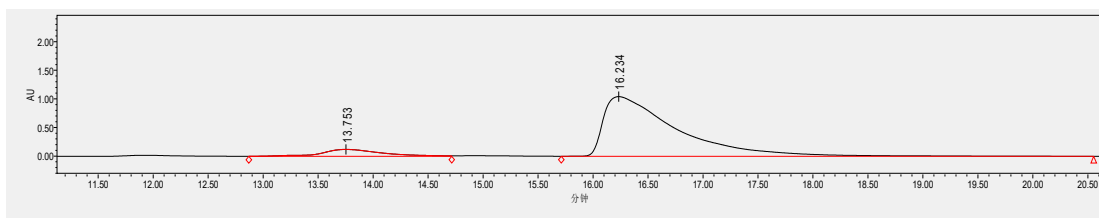

| peak | Retention time (min) | Area (μV*s) | Area (%) | Height  |
|------|----------------------|-------------|----------|---------|
| 1    | 13.753               | 4680620     | 8.85     | 120794  |
| 2    | 16.234               | 48234645    | 91.15    | 1043259 |

Enantiomerically enriched *syn*-6ad



Ethyl

(3*R*,5'*S*)-1-acetyl-5'-(4-fluorophenyl)-2-oxodispiro[indoline-3,1'-cyclopentane-2',3''-oxetan]-3'-en-3'-carboxylate (*syn*-6ae)

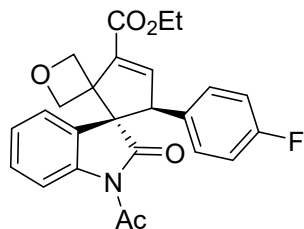

According to the general procedure to afford the mixture of two isomers (90.2 mg, 98% yield), and the title compound was further purified as a white solid; M.p. 164.3 – 166.1 °C;  $[\alpha]_D^{25} = +236.279$  (c 0.22, CHCl<sub>3</sub>); **<sup>1</sup>H NMR** (400 MHz, CDCl<sub>3</sub>) δ 8.08 (d, *J* = 8.2 Hz, 1H), 7.16 (d, *J* = 9.1 Hz, 2H), 6.94 (s, 1H), 6.86 (t, *J* = 6.9 Hz, 2H), 6.79 (t, *J* = 7.7 Hz, 3H), 5.16 (d, *J* = 6.8 Hz, 1H), 5.05 (d, *J* = 7.0 Hz, 1H), 4.97 (d, *J* = 6.8 Hz, 1H), 4.60 (s, 1H), 4.48 – 4.29 (m, 2H), 3.84 (d, *J* = 7.0 Hz, 1H), 2.76 (s, 3H), 1.42 (t, *J* = 7.1 Hz, 3H); **<sup>13</sup>C NMR** (101 MHz, CDCl<sub>3</sub>): δ 177.6, 170.5, 163.3, 162.0 (d, *J*<sub>C-F</sub> = 247.3 Hz), 144.9, 140.0, 138.0, 131.8 (d, *J*<sub>C-F</sub> = 3.2 Hz), 129.4 (d, *J*<sub>C-F</sub> = 8.1 Hz), 129.5 (d, *J* = 8.1 Hz), 129.2, 125.9, 124.6, 123.8, 116.4, 115.4 (d, *J*<sub>C-F</sub> = 21.5 Hz), 76.1, 75.4, 64.8, 61.2, 58.9, 56.8, 26.9, 14.2; **HRMS** (ESI): *m/z* calcd for C<sub>25</sub>H<sub>23</sub>FNO<sub>5</sub> [M+H]<sup>+</sup> = 436.1555, found = 436.1556; **HPLC**: The ee value was 87%, *t<sub>R</sub>* (major) = 15.7 min, *t<sub>R</sub>* (minor) = 14.3 min (Chiralpak IA 3, λ = 254 nm, 7% *i*-PrOH/hexane, flow rate = 1.0 mL/min).

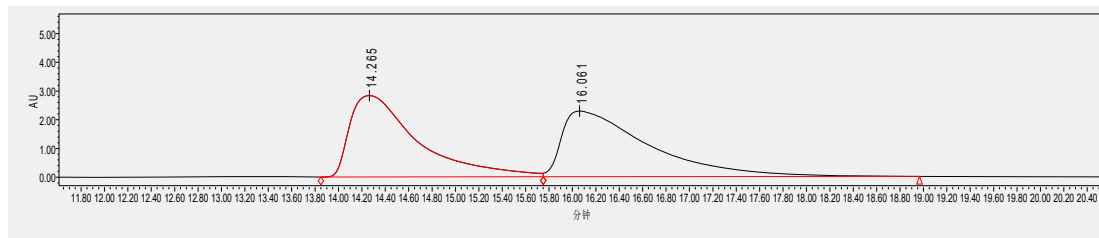

| peak | Retention time (min) | Area (μV*s) | Area (%) | Height  |
|------|----------------------|-------------|----------|---------|
| 1    | 14.265               | 113952278   | 49.01    | 2836227 |
| 2    | 16.061               | 118563003   | 50.99    | 2287401 |

Racemic *syn*-6ae

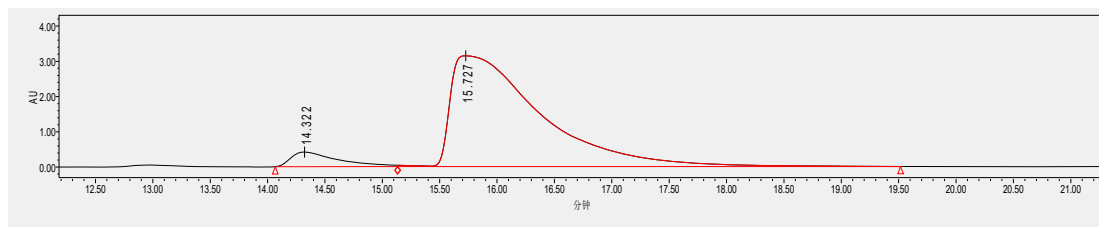

| peak | Retention time (min) | Area (μV*s) | Area (%) | Height  |
|------|----------------------|-------------|----------|---------|
| 1    | 14.322               | 11829066    | 6.46     | 415214  |
| 2    | 15.727               | 171336798   | 93.54    | 3147112 |

Enantiomerically enriched *syn*-6ae

Ethyl

(3*R*,5'*S*)-1-acetyl-5'-(4-chlorophenyl)-2-oxodispiro[indoline-3,1'-cyclopentane-2',3''-oxetan]-3'-en  
e-3'-carboxylate (*syn*-6af)

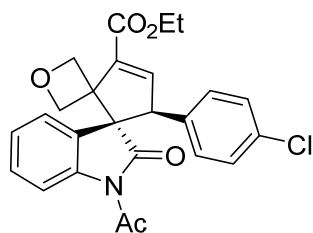

According to the general procedure to afford the mixture of two isomers (87.2 mg, 95% yield), and the title compound was further purified as a white solid; M.p. 175.6 – 181.7 °C;  $[\alpha]^{25}_{\text{D}} = +263.745$  (c 0.25, CHCl<sub>3</sub>);  $^1\text{H NMR}$  (400 MHz, CDCl<sub>3</sub>)  $\delta$  8.35 (d,  $J = 8.2$  Hz, 1H), 7.40 (t,  $J = 7.9$  Hz, 1H), 7.17 (t,  $J = 7.5$  Hz, 1H), 7.09 (d,  $J = 8.3$  Hz, 2H), 7.04 (d,  $J = 7.5$  Hz, 1H), 6.77 (d,  $J = 8.3$  Hz, 2H), 6.46 (s, 1H), 4.78 (d,  $J = 7.0$  Hz, 1H), 4.60 (d,  $J = 6.9$  Hz, 1H), 4.45 (d,  $J = 7.6$  Hz, 1H), 4.39 (d,  $J = 9.1$  Hz, 2H), 4.33 (q,  $J = 7.1$  Hz, 2H), 2.68 (s, 3H), 1.37 (t,  $J = 7.1$  Hz, 3H);  $^{13}\text{C NMR}$  (101 MHz, CDCl<sub>3</sub>):  $\delta$  176.9, 171.7, 170.4, 143.1, 140.3, 134.1, 131.8, 130.9, 129.7, 128.7, 127.4, 126.4, 125.9, 125.6, 117.0, 78.2, 75.5, 66.9, 61.6, 57.5, 57.0, 26.7, 14.2; **HRMS** (ESI):  $m/z$  calcd for C<sub>25</sub>H<sub>23</sub>ClNO<sub>5</sub> [M<sup>+</sup>+H]<sup>+</sup> = 452.1259, found = 452.1259, [M+H]<sup>+</sup> = 454.1259, found = 454.1241; **HPLC**: The ee value was 96%,  $t_{\text{R}}$  (major) = 29.7 min,  $t_{\text{R}}$  (minor) = 20.8 min (Chiralpak IE 3,  $\lambda = 254$  nm, 10% *i*-PrOH/hexane, flow rate = 1.0 mL/min).

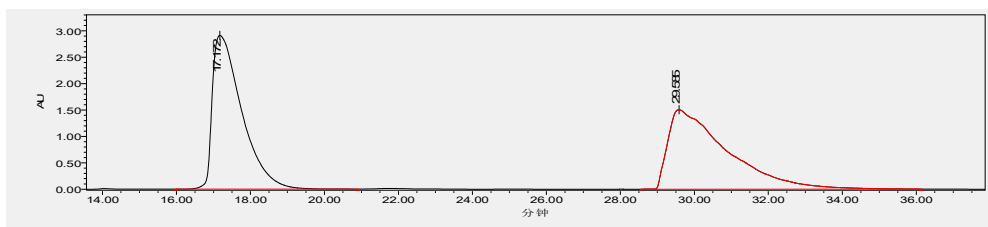

| peak | Retention time (min) | Area ( $\mu\text{V}\cdot\text{s}$ ) | Area (%) | Height  |
|------|----------------------|-------------------------------------|----------|---------|
| 1    | 17.172               | 161162647                           | 49.11    | 2913585 |
| 2    | 29.585               | 166982315                           | 50.89    | 1504667 |

Racemic *syn*-6af

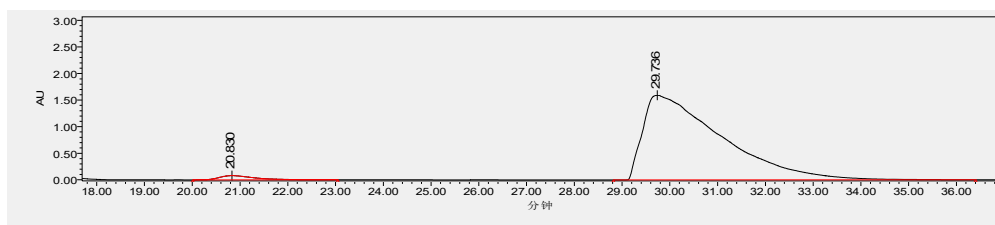

| peak | Retention time (min) | Area ( $\mu\text{V}\cdot\text{s}$ ) | Area (%) | Height  |
|------|----------------------|-------------------------------------|----------|---------|
| 1    | 20.830               | 3992319                             | 2.15     | 79362   |
| 2    | 29.736               | 181737325                           | 97.85    | 1590193 |

Enantiomerically enriched *syn*-6af

Ethyl

(3*R*,5'*S*)-1-acetyl-5'-(4-bromophenyl)-2-oxodispiro[indoline-3,1'-cyclopentane-2',3''-oxetan]-3'-en-*e*-3'-carboxylate (**syn-6ag**)

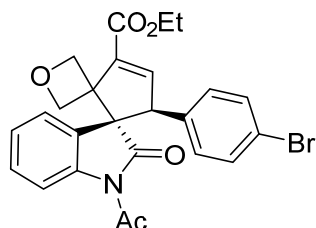

According to the general procedure to afford the mixture of two isomers (97.1 mg, 95% yield), and the title compound was further purified as a white solid; M.p. 136.1 – 138.7 °C;  $[\alpha]_D^{25} = +264.898$  (c 0.25, CHCl<sub>3</sub>); **<sup>1</sup>H NMR** (400 MHz, CDCl<sub>3</sub>) δ 8.09 (d, *J* = 8.2 Hz, 1H), 7.23 (d, *J* = 7.6 Hz, 2H), 7.18 (t, *J* = 7.9 Hz, 1H), 7.13 (s, 1H), 6.95 (t, *J* = 7.6 Hz, 1H), 6.79 (dd, *J* = 13.9, 7.7 Hz, 3H), 5.16 (d, *J* = 6.7 Hz, 1H), 5.04 (d, *J* = 7.0 Hz, 1H), 4.96 (d, *J* = 6.8 Hz, 1H), 4.58 (s, 1H), 4.39 (dd, *J* = 13.8, 6.8 Hz, 2H), 3.81 (d, *J* = 7.0 Hz, 1H), 2.76 (s, 3H), 1.42 (t, *J* = 7.1 Hz, 3H); **<sup>13</sup>C NMR** (101 MHz, CDCl<sub>3</sub>): δ 177.5, 170.4, 163.3, 144.5, 139.9, 138.2, 135.1, 131.5, 129.5, 129.3, 125.7, 124.6, 123.7, 121.7, 116.5, 76.1, 75.3, 64.7, 61.2, 59.1, 56.8, 26.9, 14.2; **HRMS** (ESI): *m/z* calcd for C<sub>25</sub>H<sub>23</sub>BrNO<sub>5</sub> [M+H]<sup>+</sup> = 496.0754, found = 496.0755, [M<sup>+</sup>+H]<sup>+</sup> = 498.0754, found = 498.0738; **HPLC**: The ee value was 99%, *t<sub>R</sub>* (major) = 11.2 min, *t<sub>R</sub>* (minor) = 30.0 min (Chiralpak IA 3, λ = 254 nm, 10% *i*-PrOH/hexane, flow rate = 1.0 mL/min).

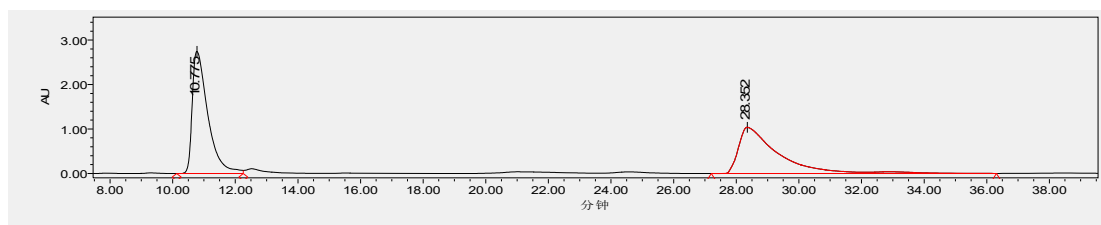

| peak | Retention time (min) | Area (μV*s) | Area (%) | Height  |
|------|----------------------|-------------|----------|---------|
| 1    | 10.775               | 95149219    | 50.99    | 2748269 |
| 2    | 28.352               | 91455263    | 49.01    | 1039614 |

Racemic **syn-6ag**

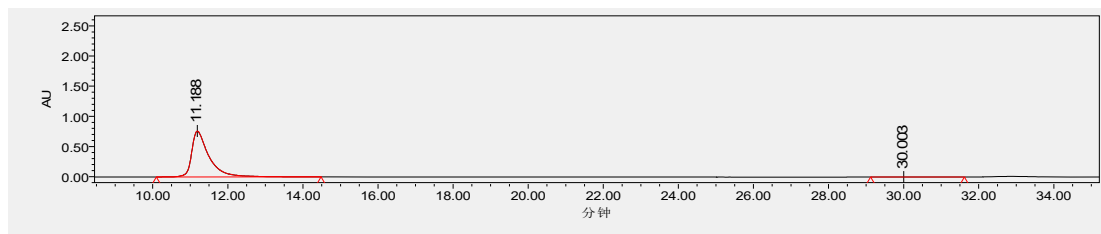

| peak | Retention time (min) | Area (μV*s) | Area (%) | Height |
|------|----------------------|-------------|----------|--------|
| 1    | 11.188               | 24411800    | 99.58    | 761509 |
| 2    | 30.003               | 101878      | 0.42     | 1483   |

Enantiomerically enriched **syn-6ag**

Ethyl

(3*R*,5'*S*)-1-acetyl-5'-(naphthalen-1-yl)-2-oxodispiro[indoline-3,1'-cyclopentane-2',3''-oxetan]-3'-ene-3'-carboxylate (**syn-6ah**)

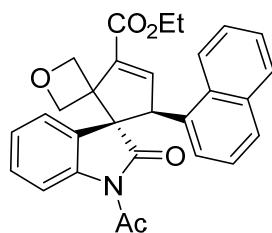

According to the general procedure to afford the mixture of two isomers (66.4 mg, 72% yield), and the title compound was further purified as a white solid; M.p. 181.4 – 193.2 °C;  $[\alpha]_D^{25} = +152.915$  (c 0.22, CHCl<sub>3</sub>); <sup>1</sup>H NMR (400 MHz, CDCl<sub>3</sub>) δ 7.94 (d, *J* = 8.3 Hz, 1H), 7.78 – 7.63 (m, 3H), 7.38 (dd, *J* = 13.4, 7.3 Hz, 2H), 7.26 (d, *J* = 8.9 Hz, 1H), 7.16 (d, *J* = 7.2 Hz, 1H), 7.03 (t, *J* = 7.9 Hz, 1H), 6.75 (t, *J* = 7.6 Hz, 1H), 6.50 (d, *J* = 7.7 Hz, 1H), 5.38 (s, 1H), 5.16 (dd, *J* = 19.0, 6.8 Hz, 2H), 5.07 (d, *J* = 6.9 Hz, 1H), 4.58 – 4.41 (m, 2H), 4.08 (d, *J* = 6.9 Hz, 1H), 2.73 (d, *J* = 1.2 Hz, 3H), 1.54 – 1.45 (m, 3H); <sup>13</sup>C NMR (101 MHz, CDCl<sub>3</sub>): δ 178.4, 170.3, 163.4, 146.1, 139.9, 138.4, 133.5, 132.6, 131.6, 128.8, 128.6, 126.8, 126.2, 125.8, 125.7, 124.6, 124.5, 124.1, 122.5, 116.2, 76.6, 75.9, 63.8, 61.1, 58.5, 53.2, 26.9, 14.3; HRMS (ESI): *m/z* calcd for C<sub>29</sub>H<sub>26</sub>NO<sub>5</sub> [M+H]<sup>+</sup> = 468.1805, found = 468.1812; HPLC: The ee value was 92%, *t<sub>R</sub>* (major) = 15.0 min, *t<sub>R</sub>* (minor) = 13.1 min (Chiralpak IA, λ = 254 nm, 10% *i*-PrOH/hexane, flow rate = 1.0 mL/min).

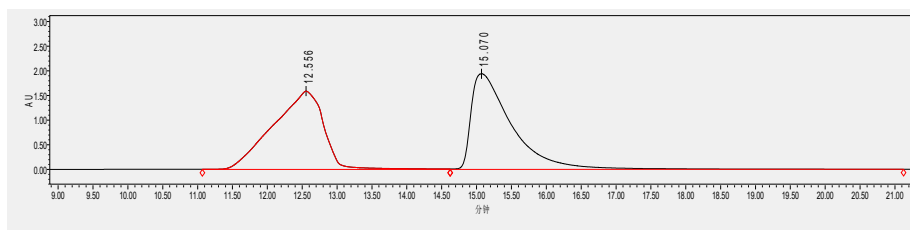

| peak | Retention time (min) | Area (μV*s) | Area (%) | Height  |
|------|----------------------|-------------|----------|---------|
| 1    | 12.556               | 80337537    | 50.47    | 1587466 |
| 2    | 15.070               | 78841236    | 49.53    | 1939848 |

Racemic **syn-6ah**

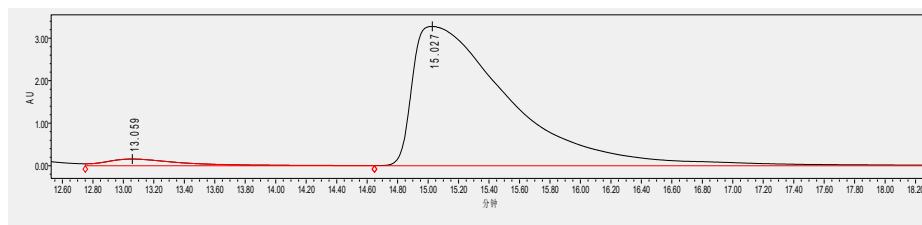

| peak | Retention time (min) | Area (μV*s) | Area (%) | Height  |
|------|----------------------|-------------|----------|---------|
| 1    | 13.059               | 5528910     | 3.62     | 157158  |
| 2    | 15.027               | 147160681   | 96.38    | 3279429 |

Enantiomerically enriched **syn-6ah**

Ethyl

(3*R*,5'*S*)-1-acetyl-5'-(naphthalen-2-yl)-2-oxodispiro[indoline-3,1'-cyclopentane-2',3''-oxetan]-3'-ene-3'-carboxylate (**syn-6ai**)

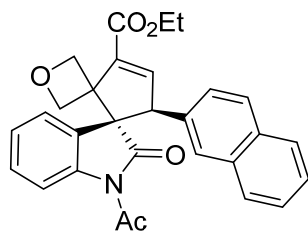

According to the general procedure to afford the mixture of two isomers (68.1 mg, 73% yield), and the title compound was further purified as a white solid; M.p. 159.6 – 166.2 °C;  $[\alpha]_D^{25} = +80.100$  (c 0.20, CHCl<sub>3</sub>); <sup>1</sup>H NMR (400 MHz, CDCl<sub>3</sub>) δ 8.06 (d, *J* = 8.2 Hz, 1H), 7.72 (t, *J* = 7.7 Hz, 2H), 7.61 (d, *J* = 8.4 Hz, 1H), 7.48 – 7.40 (m, 3H), 7.35 (s, 1H), 7.11 (t, *J* = 7.5 Hz, 1H), 6.99 (d, *J* = 8.4 Hz, 1H), 6.87 (dd, *J* = 11.5, 7.4 Hz, 2H), 5.21 (d, *J* = 6.8 Hz, 1H), 5.12 (d, *J* = 7.0 Hz, 1H), 5.06 (d, *J* = 6.8 Hz, 1H), 4.83 (s, 1H), 4.55 – 4.41 (m, 2H), 3.93 (d, *J* = 7.0 Hz, 1H), 2.83 (s, 3H), 1.49 (t, *J* = 7.1 Hz, 3H); <sup>13</sup>C NMR (101 MHz, CDCl<sub>3</sub>): δ 177.8, 170.5, 163.5, 145.3, 139.9, 137.9, 133.6, 132.9, 132.5, 129.1, 128.2, 127.6, 127.5, 126.9, 126.3, 126.1, 125.9, 125.7, 124.5, 124.0, 116.4, 76.1, 75.5, 64.7, 61.2, 59.1, 57.5, 27.0, 14.3; HRMS (ESI): *m/z* calcd for C<sub>29</sub>H<sub>26</sub>NO<sub>5</sub> [M+H]<sup>+</sup> = 468.1805, found = 468.1813; HPLC: The ee value was 80%, *t<sub>R</sub>* (major) = 13.3 min, *t<sub>R</sub>* (minor) = 11.9 min (Chiralpak IA 3, λ = 254 nm, 10% *i*-PrOH/hexane, flow rate = 1.0 mL/min).

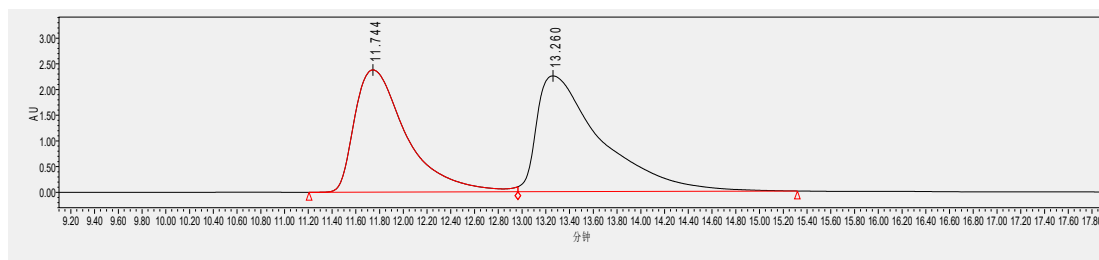

| peak | Retention time (min) | Area (μV*s) | Area (%) | Height  |
|------|----------------------|-------------|----------|---------|
| 1    | 11.744               | 72277677    | 46.08    | 2377521 |
| 2    | 13.260               | 84565474    | 53.92    | 2252333 |

Racemic **syn-6ai**

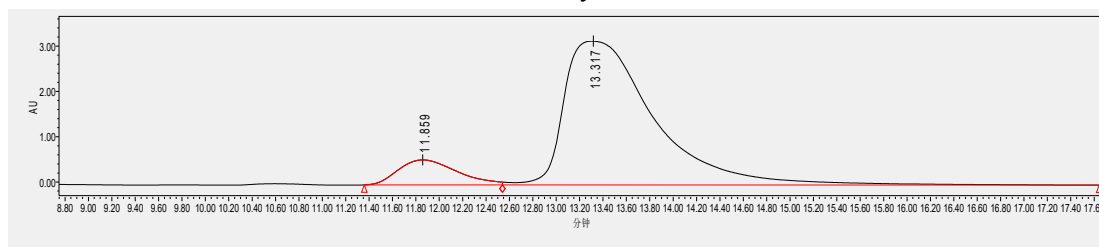

| peak | Retention time (min) | Area (μV*s) | Area (%) | Height  |
|------|----------------------|-------------|----------|---------|
| 1    | 11.859               | 19277935    | 10.20    | 551743  |
| 2    | 13.317               | 169747531   | 89.80    | 3175480 |

Enantiomerically enriched **syn-6ai**

Ethyl

(3*R*,5'*R*)-1-acetyl-2-oxo-5'-(pyridin-2-yl)dispiro[indoline-3,1'-cyclopentane-2',3''-oxetan]-3'-ene-3'-carboxylate (*syn*-6aj)

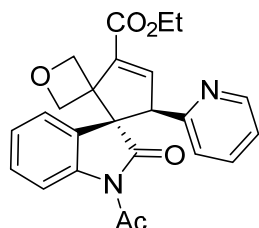

According to the general procedure to afford the mixture of two isomers (78.6 mg, 93% yield), and the title compound was further purified as a white solid; M.p. 125.6 – 129.4 °C;  $[\alpha]_D^{25} = -5.941$  (c 0.20, CHCl<sub>3</sub>); <sup>1</sup>H NMR (400 MHz, CDCl<sub>3</sub>) δ 8.40 (d, *J* = 8.2 Hz, 1H), 8.33 (d, *J* = 8.2 Hz, 1H), 8.19 (t, *J* = 6.4 Hz, 1H), 8.12 (d, *J* = 4.7 Hz, 1H), 7.61 (dd, *J* = 15.9, 7.8 Hz, 1H), 7.54 (q, *J* = 7.7 Hz, 2H), 7.32 (d, *J* = 7.3 Hz, 1H), 7.06 (q, *J* = 7.1 Hz, 2H), 6.99 (t, *J* = 5.8 Hz, 1H), 6.80 (d, *J* = 7.6 Hz, 1H), 6.71 (s, 1H), 5.13 (t, *J* = 6.2 Hz, 1H), 4.82 (d, *J* = 7.0 Hz, 1H), 4.75 (d, *J* = 7.0 Hz, 1H), 4.67 (d, *J* = 7.1 Hz, 1H), 4.54 (d, *J* = 7.8 Hz, 1H), 4.48 (s, 1H), 4.42 – 4.38 (m, 2H), 4.36 (d, *J* = 7.1 Hz, 1H), 4.31 (d, *J* = 7.4 Hz, 1H), 3.91 (t, *J* = 6.4 Hz, 1H), 2.76 (s, 3H), 1.41 (t, *J* = 7.1 Hz, 3H); <sup>13</sup>C NMR (101 MHz, CDCl<sub>3</sub>): δ 177.8, 171.8, 171.1, 151.1, 148.5, 145.9, 141.1, 135.9, 130.8, 129.1, 128.1, 124.2, 122.6, 121.5, 120.5, 116.7, 80.1, 75.7, 66.1, 61.5, 59.9, 55.3, 26.8, 14.2; HRMS (ESI): *m/z* calcd for C<sub>24</sub>H<sub>23</sub>N<sub>2</sub>O<sub>5</sub> [M+H]<sup>+</sup> = 419.1601, found = 419.1609; HPLC: The ee value was 50%, *t<sub>R</sub>* (major) = 44.4 min, *t<sub>R</sub>* (minor) = 34.8 min (Chiralpak IE 3, λ = 254 nm, 10% *i*-PrOH/hexane, flow rate = 1.0 mL/min).

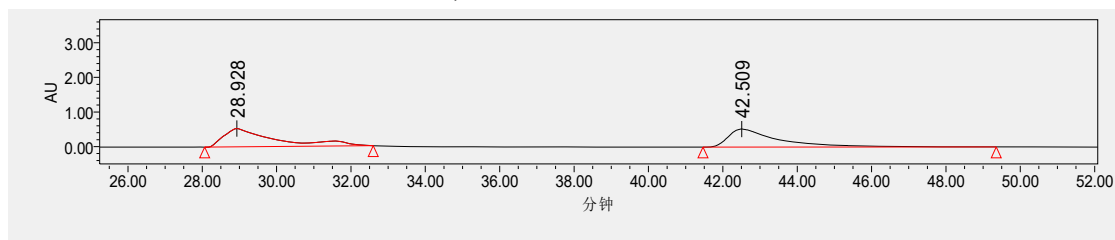

| peak | Retention time (min) | Area (μV*s) | Area (%) | Height |
|------|----------------------|-------------|----------|--------|
| 1    | 28.928               | 50361321    | 50.94    | 526578 |
| 2    | 42.509               | 48494140    | 49.06    | 517374 |

Racemic *syn*-6aj

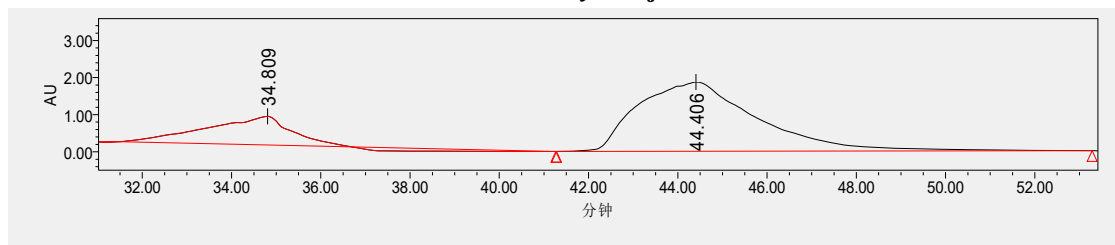

| peak | Retention time (min) | Area (μV*s) | Area (%) | Height  |
|------|----------------------|-------------|----------|---------|
| 1    | 34.809               | 115411888   | 24.95    | 773441  |
| 2    | 44.406               | 347204896   | 75.05    | 1870236 |

Enantiomerically enriched *syn*-6aj

Ethyl

(3*R*,5'*R*)-1-acetyl-5'-(furan-2-yl)-2-oxodispiro[indoline-3,1'-cyclopentane-2',3''-oxetan]-3'-ene-3'-carboxylate (*syn*-6ak)

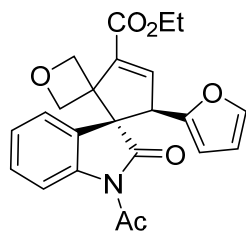

According to the general procedure to afford the mixture of two isomers (77.4 mg, 95% yield), and the title compound was further purified as white solid; M.p. 144.9 – 148.1°C;  $[\alpha]_D^{25} = +58.654$  (c 0.21, CHCl<sub>3</sub>); <sup>1</sup>H NMR (400 MHz, CDCl<sub>3</sub>) δ 8.20 (d, *J* = 8.2 Hz, 1H), 7.24 (d, *J* = 7.9 Hz, 1H), 7.09 (d, *J* = 9.6 Hz, 2H), 6.96 (t, *J* = 7.6 Hz, 1H), 6.67 (d, *J* = 7.6 Hz, 1H), 6.12 (s, 1H), 5.97 (d, *J* = 2.6 Hz, 1H), 5.05 – 4.90 (m, 3H), 4.57 (s, 1H), 4.39 (dd, *J* = 7.0, 4.1 Hz, 2H), 4.00 (d, *J* = 7.0 Hz, 1H), 2.76 (s, 3H), 1.41 (t, *J* = 7.1 Hz, 3H); <sup>13</sup>C NMR (101 MHz, CDCl<sub>3</sub>): δ 177.4, 170.6, 163.3, 149.8, 142.3, 142.2, 140.2, 137.8, 129.2, 125.8, 124.7, 123.9, 116.3, 110.3, 108.1, 76.1, 75.5, 63.1, 61.2, 58.7, 51.1, 26.9, 14.2; HRMS (ESI): *m/z* calcd for C<sub>23</sub>H<sub>22</sub>NO<sub>6</sub> [M+H]<sup>+</sup> = 408.1442, found = 408.1443; HPLC: The ee value was 60%, *t<sub>R</sub>* (major) = 14.4 min, *t<sub>R</sub>* (minor) = 10.4 min (Chiralpak IA 3, λ = 254 nm, 10% *i*-PrOH/hexane, flow rate = 1.0 mL/min).

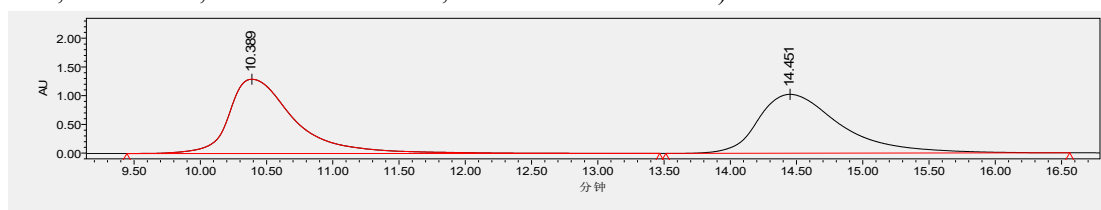

| peak | Retention time (min) | Area (μV*s) | Area (%) | Height  |
|------|----------------------|-------------|----------|---------|
| 1    | 10.389               | 44621421    | 50.15    | 1293213 |
| 2    | 14.451               | 44362818    | 49.85    | 1025184 |

Racemic *syn*-6ak

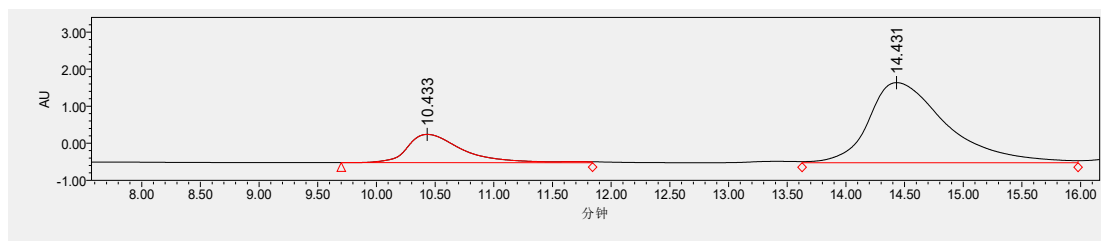

| peak | Retention time (min) | Area (μV*s) | Area (%) | Height  |
|------|----------------------|-------------|----------|---------|
| 1    | 10.433               | 25197625    | 20.07    | 764072  |
| 2    | 14.431               | 100362535   | 79.93    | 2163793 |

Enantiomerically enriched *syn*-6ak

### Ethyl

(3*R*,5'*R*)-1-acetyl-2-oxo-5'-propyldispiro[indoline-3,1'-cyclopentane-2',3''-oxetan]-3'-ene-3'-carboxylate (*syn*-6al)

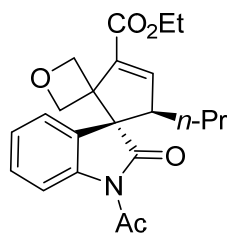

According to the general procedure to afford the mixture of two isomers (74.0 mg, 96% yield), and the title compound was further purified as a white solid; M.p. 135.8 – 139.8 °C;  $[\alpha]_D^{25} = +13.364$  (c 0.22, CHCl<sub>3</sub>); **<sup>1</sup>H NMR** (400 MHz, CDCl<sub>3</sub>) δ 8.30 (d, *J* = 8.2 Hz, 1H), 7.33 (dd, *J* = 12.0, 4.7 Hz, 1H), 7.08 (dt, *J* = 14.6, 7.4 Hz, 2H), 6.93 (d, *J* = 1.7 Hz, 1H), 5.11 (d, *J* = 6.8 Hz, 1H), 4.97 (d, *J* = 7.0 Hz, 1H), 4.82 (d, *J* = 6.8 Hz, 1H), 4.33 (qd, *J* = 7.1, 4.9 Hz, 2H), 3.59 (d, *J* = 7.0 Hz, 1H), 3.32 (t, *J* = 6.8 Hz, 1H), 2.75 (s, 3H), 1.37 (t, *J* = 7.1 Hz, 3H), 1.32 – 1.20 (m, 2H), 1.11 – 1.00 (m, 2H), 0.74 (t, *J* = 6.9 Hz, 3H); **<sup>13</sup>C NMR** (101 MHz, CDCl<sub>3</sub>): δ 177.6, 170.8, 163.6, 147.4, 140.2, 135.4, 129.1, 126.8, 124.9, 123.1, 116.7, 75.5, 75.4, 62.8, 60.8, 59.6, 51.5, 31.5, 26.9, 20.9, 14.2, 13.8; **HRMS** (ESI): *m/z* calcd for C<sub>22</sub>H<sub>26</sub>NO<sub>5</sub> [M+H]<sup>+</sup> = 384.1805, found = 384.1808; **HPLC**: The ee value was 42%, *t<sub>R</sub>* (major) = 29.8 min, *t<sub>R</sub>* (minor) = 27.8 min (Chiralpak IE 3, λ = 254 nm, 10% *i*-PrOH/hexane, flow rate = 1.0 mL/min).

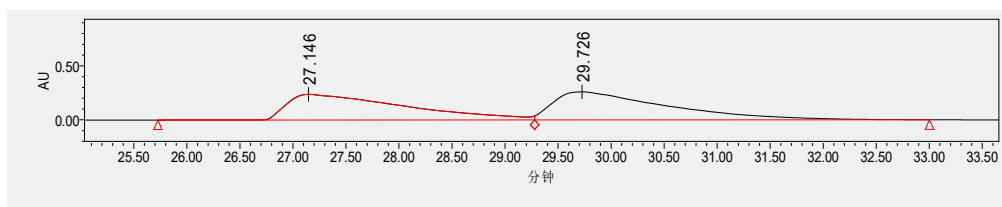

| peak | Retention time (min) | Area (μV*s) | Area (%) | Height |
|------|----------------------|-------------|----------|--------|
| 1    | 27.146               | 18366360    | 48.77    | 237628 |
| 2    | 29.726               | 19293631    | 51.23    | 259725 |

Racemic *syn*-6al

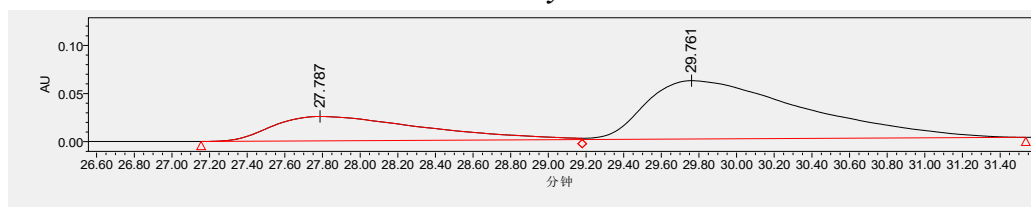

| peak | Retention time (min) | Area (μV*s) | Area (%) | Height |
|------|----------------------|-------------|----------|--------|
| 1    | 27.787               | 1425314     | 28.71    | 25444  |
| 2    | 29.761               | 3538534     | 71.29    | 60648  |

Enantiomerically enriched *syn*-6al



Ethyl

(3*R*,5'*S*)-1-acetyl-5-methyl-2-oxo-5'-phenylspiro[indoline-3,1'-cyclopentane-2',3''-oxetan]-3'-ene-3'-carboxylate (*syn*-6am)

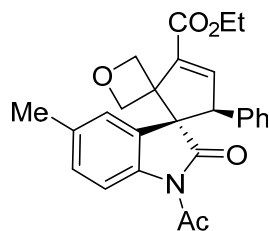

According to the general procedure to afford the mixture of two isomers (92.3 mg, 98% yield), and the title compound was further purified as a white solid; M.p. 155.3 – 158.6 °C;  $[\alpha]_D^{25} = +174.000$  (c 0.20, CHCl<sub>3</sub>); <sup>1</sup>H NMR (400 MHz, CDCl<sub>3</sub>) δ 7.94 (d, *J* = 8.3 Hz, 1H), 7.20 (d, *J* = 2.0 Hz, 1H), 7.16 – 7.08 (m, 3H), 6.94 (d, *J* = 8.3 Hz, 1H), 6.90 – 6.82 (m, 2H), 6.42 (s, 1H), 5.10 – 4.96 (m, 3H), 4.56 (d, *J* = 1.5 Hz, 1H), 4.48 – 4.38 (m, 2H), 3.95 (d, *J* = 6.9 Hz, 1H), 2.75 (s, 3H), 2.14 (s, 3H), 1.43 (t, *J* = 7.1 Hz, 3H); <sup>13</sup>C NMR (101 MHz, CDCl<sub>3</sub>): δ 178.0, 170.4, 163.5, 145.2, 137.9, 137.7, 136.2, 134.0, 129.4, 128.3, 127.9, 127.7, 125.8, 124.7, 116.0, 76.3, 75.5, 64.6, 61.1, 58.6, 57.4, 26.9, 21.1, 14.2; HRMS (ESI): *m/z* calcd for C<sub>26</sub>H<sub>26</sub>NO<sub>5</sub> [M+H]<sup>+</sup> = 432.1805, found = 432.1810; HPLC: The ee value was 90%, *t*<sub>R</sub> (major) = 14.3 min, *t*<sub>R</sub> (minor) = 9.4 min (Chiralpak IA 3, λ = 254 nm, 10% *i*-PrOH/hexane, flow rate = 1.0 mL/min).

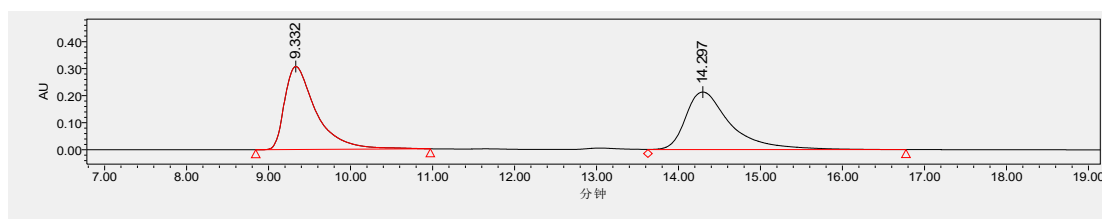

| peak | Retention time (min) | Area (μV*s) | Area (%) | Height |
|------|----------------------|-------------|----------|--------|
| 1    | 9.332                | 8200993     | 50.36    | 307077 |
| 2    | 14.297               | 8084760     | 49.64    | 212498 |

Racemic *syn*-6am

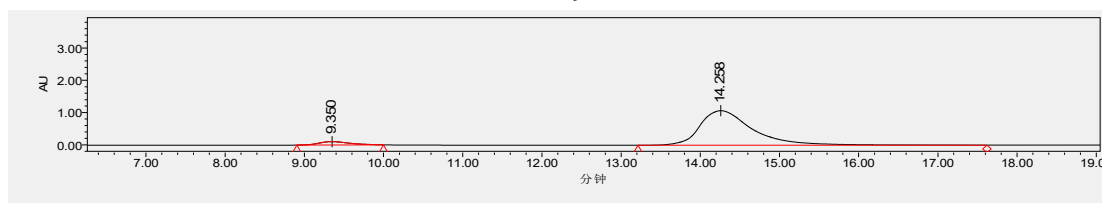

| peak | Retention time (min) | Area (μV*s) | Area (%) | Height  |
|------|----------------------|-------------|----------|---------|
| 1    | 9.350                | 2755141     | 5.27     | 102283  |
| 2    | 14.258               | 49483245    | 94.73    | 1069403 |

Enantiomerically enriched *syn*-6am

### Ethyl

(3*R*,5'*S*)-1-acetyl-6-methoxy-2-oxo-5'-phenylspiro[indoline-3,1'-cyclopentane-2',3''-oxetan]-3'-ene-3'-carboxylate (*syn*-6an)

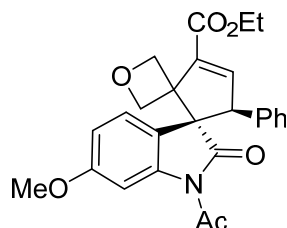

According to the general procedure to afford the mixture of two isomers (76.7 mg, 86% yield), and the title compound was further purified as a white solid; M.p. 115.4 – 119.2°C;  $[\alpha]_D^{25} = +174.884$  (c 0.22, CHCl<sub>3</sub>); <sup>1</sup>H NMR (400 MHz, CDCl<sub>3</sub>) δ 7.74 (s, 1H), 7.18 (s, 2H), 7.13 (d, *J* = 3.2 Hz, 3H), 6.88 (d, *J* = 2.9 Hz, 2H), 6.54 (s, 1H), 6.44 (d, *J* = 8.4 Hz, 1H), 5.10 – 4.93 (m, 3H), 4.53 (s, 1H), 4.45 – 4.34 (m, 2H), 3.95 (d, *J* = 6.9 Hz, 1H), 3.72 (s, 3H), 2.75 (s, 3H), 1.42 (t, *J* = 7.1 Hz, 3H); <sup>13</sup>C NMR (101 MHz, CDCl<sub>3</sub>): δ 178.2, 170.4, 163.3, 159.7, 145.1, 140.9, 137.6, 136.0, 128.2, 127.8, 127.5, 124.7, 117.3, 110.3, 102.2, 76.0, 75.2, 64.1, 60.8, 58.5, 57.1, 55.2, 26.8, 14.1; HRMS (ESI): *m/z* calcd for C<sub>26</sub>H<sub>26</sub>NO<sub>6</sub> [M+H]<sup>+</sup> = 448.1755, found = 448.1758; HPLC: The ee value was 86%, *t*<sub>R</sub> (major) = 20.4 min, *t*<sub>R</sub> (minor) = 10.9 min (Chiralpak IA 3, λ = 254 nm, 10% *i*-PrOH/hexane, flow rate = 1.0 mL/min).

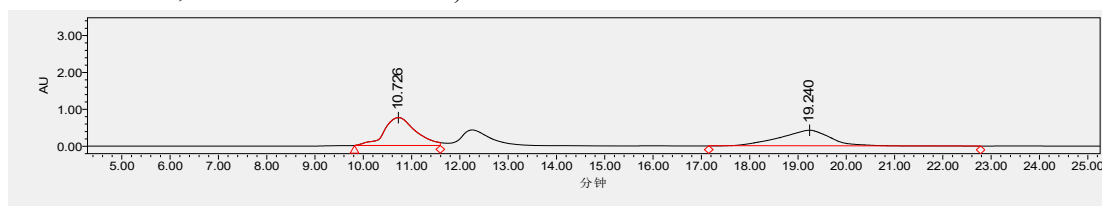

| peak | Retention time (min) | Area (μV*s) | Area (%) | Height |
|------|----------------------|-------------|----------|--------|
| 1    | 10.726               | 34192145    | 52.37    | 754131 |
| 2    | 19.240               | 31100200    | 47.63    | 423200 |

Racemic *syn*-6an

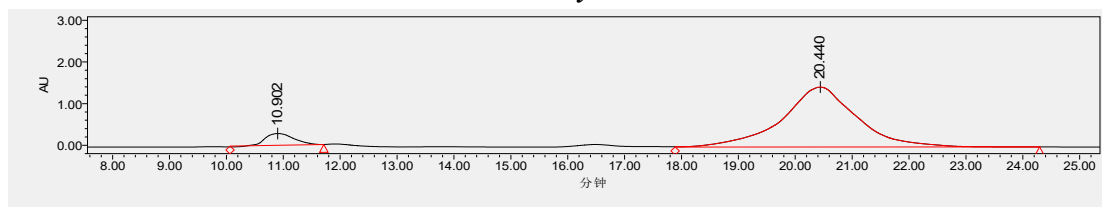

| peak | Retention time (min) | Area (μV*s) | Area (%) | Height  |
|------|----------------------|-------------|----------|---------|
| 1    | 10.902               | 10090653    | 7.14     | 281151  |
| 2    | 20.440               | 131213802   | 92.86    | 1441470 |

Enantiomerically enriched *syn*-6an

3'-ethyl

6-methyl

(3*R*,5'*S*)-1-acetyl-2-oxo-5'-phenyldispiro[indoline-3,1'-cyclopentane-2',3''-oxetan]-3'-ene-3',6-dicarboxylate (*syn*-6ao)

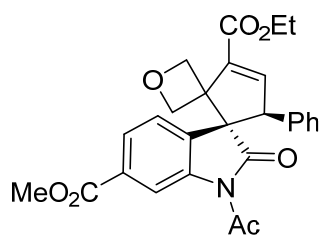

According to the general procedure to afford the mixture of two isomers (101.3 mg, 99% yield), and the title compound was further purified as a white solid; M.p. 179.3 – 185.5 °C;  $[\alpha]_D^{25} = +35.341$  (c 0.25, CHCl<sub>3</sub>); <sup>1</sup>H NMR (400 MHz, CDCl<sub>3</sub>) δ 8.69 (s, 1H), 7.65 (d, *J* = 7.9 Hz, 1H), 7.21 (d, *J* = 1.5 Hz, 1H), 7.16 – 7.05 (m, 3H), 6.87 (d, *J* = 8.2 Hz, 3H), 5.16 (d, *J* = 6.8 Hz, 1H), 5.07 (d, *J* = 7.0 Hz, 1H), 4.99 (d, *J* = 6.9 Hz, 1H), 4.66 (s, 1H), 4.48 – 4.32 (m, 2H), 3.85 (s, 3H), 3.80 (d, *J* = 7.0 Hz, 1H), 2.79 (s, 3H), 1.43 (t, *J* = 7.1 Hz, 3H); <sup>13</sup>C NMR (101 MHz, CDCl<sub>3</sub>): δ 179.3, 175.7, 163.5, 150.4, 139.2, 136.1, 132.3, 132.2, 130.7, 129.4, 124.3, 76.0, 75.4, 64.8, 61.2, 59.3, 57.5, 52.3, 26.9, 14.2; HRMS (ESI): *m/z* calcd for C<sub>27</sub>H<sub>26</sub>NO<sub>7</sub> [M+H]<sup>+</sup> = 476.1704, found = 476.1709; HPLC: The ee value was 75%, *t<sub>R</sub>* (major) = 20.8 min, *t<sub>R</sub>* (minor) = 14.8 min (Chiralpak IA 3, λ = 254 nm, 10% *i*-PrOH/hexane, flow rate = 1.0 mL/min).

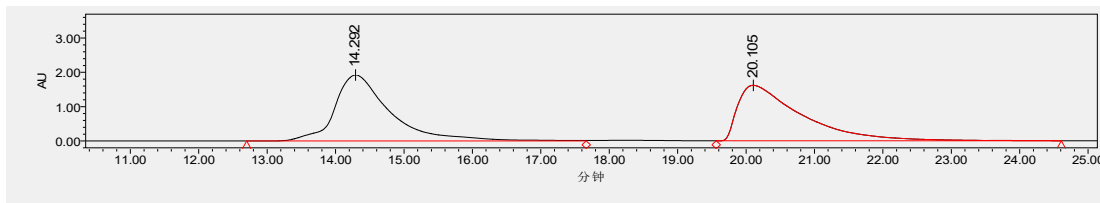

| peak | Retention time (min) | Area (μV*s) | Area (%) | Height  |
|------|----------------------|-------------|----------|---------|
| 1    | 14.292               | 108257439   | 50.86    | 1923281 |
| 2    | 20.105               | 104600581   | 49.14    | 1616719 |

Racemic *syn*-6ao

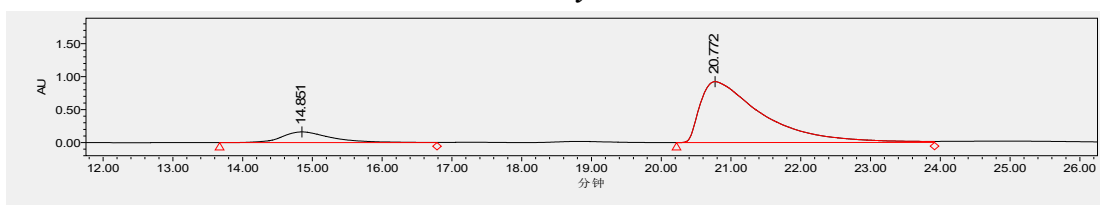

| peak | Retention time (min) | Area (μV*s) | Area (%) | Height |
|------|----------------------|-------------|----------|--------|
| 1    | 14.851               | 8123997     | 12.41    | 162825 |
| 2    | 20.772               | 57313466    | 87.59    | 923957 |

Enantiomerically enriched *syn*-6ao

Ethyl

(3*R*,5'*S*)-1-acetyl-5-fluoro-2-oxo-5'-phenylspiro[indoline-3,1'-cyclopentane-2',3''-oxetan]-3'-ene-3'-carboxylate (*syn*-6ap)

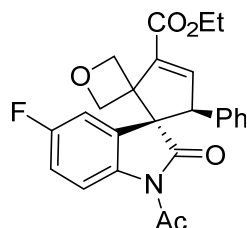

According to the general procedure to afford the mixture of two isomers (78.2 mg, 87% yield), and the title compound was further purified as a white solid; M.p. 141.3 – 143.4°C;  $[\alpha]_D^{25} = +151.082$  (c 0.23, CHCl<sub>3</sub>); <sup>1</sup>H NMR (400 MHz, CDCl<sub>3</sub>) δ 8.07 (dd, *J* = 9.0, 4.8 Hz, 1H), 7.20 (d, *J* = 2.2 Hz, 1H), 7.18 – 7.11 (m, 3H), 6.90 (dd, *J* = 6.9, 2.4 Hz, 2H), 6.85 (td, *J* = 8.9, 2.7 Hz, 1H), 6.50 (dd, *J* = 8.2, 2.7 Hz, 1H), 5.15 (d, *J* = 6.8 Hz, 1H), 5.10 (d, *J* = 7.0 Hz, 1H), 4.99 (d, *J* = 6.8 Hz, 1H), 4.63 (d, *J* = 2.1 Hz, 1H), 4.41 (dd, *J* = 7.1, 5.1 Hz, 2H), 3.85 (d, *J* = 7.0 Hz, 1H), 2.76 (s, 3H), 1.43 (t, *J* = 7.1 Hz, 3H); <sup>13</sup>C NMR (101 MHz, CDCl<sub>3</sub>): δ 177.3, 170.3, 163.2, 159.2 (d, *J*<sub>C-F</sub> = 244.6 Hz), 144.9, 137.7, 136.0, 135.6, 128.6, 128.1 (d, *J*<sub>C-F</sub> = 8.2 Hz), 127.9, 127.7, 117.7 (d, *J*<sub>C-F</sub> = 7.9 Hz), 115.7, 115.5, 111.5, 76.0, 75.3, 64.8, 61.2, 58.9, 57.4, 26.8, 14.2; HRMS (ESI): *m/z* calcd for C<sub>25</sub>H<sub>23</sub>FN<sub>2</sub>O<sub>5</sub> [M+H]<sup>+</sup> = 436.1555, found = 436.1559; HPLC: The ee value was 87%, *t*<sub>R</sub> (major) = 13.4 min, *t*<sub>R</sub> (minor) = 10.8 min (Chiralpak IA 3, λ = 254 nm, 7% *i*-PrOH/hexane, flow rate = 1.0 mL/min).

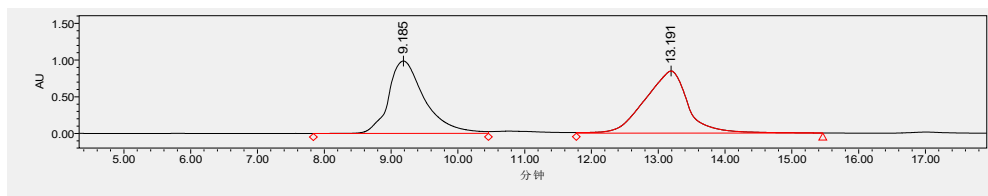

| peak | Retention time (min) | Area (μV*s) | Area (%) | Height |
|------|----------------------|-------------|----------|--------|
| 1    | 9.185                | 36901029    | 49.35    | 985334 |
| 2    | 13.191               | 37877709    | 50.65    | 845605 |

Racemic *syn*-6ap

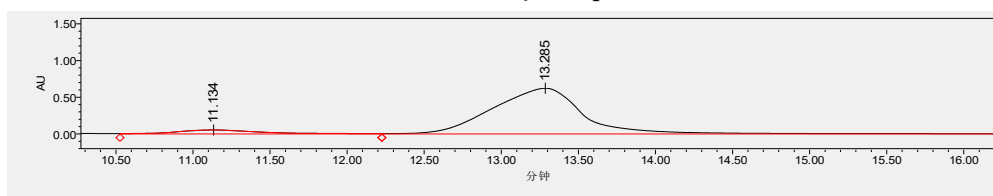

| peak | Retention time (min) | Area (μV*s) | Area (%) | Height |
|------|----------------------|-------------|----------|--------|
| 1    | 11.134               | 2086030     | 7.58     | 53926  |
| 2    | 13.285               | 25429687    | 92.42    | 622483 |

Enantiomerically enriched *syn*-6ap

Ethyl

(3*R*,5'*S*)-1-acetyl-5-chloro-2-oxo-5'-phenyldispiro[indoline-3,1'-cyclopentane-2',3''-oxetan]-3'-ene-3'-carboxylate (*syn*-6aq)

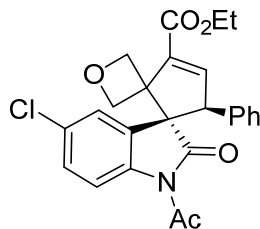

According to the general procedure to afford the mixture of two isomers (92.2 mg, 97% yield), and the title compound was further purified as a white solid; M.p. 169.7 – 173.9 °C;  $[\alpha]_D^{25} = +110.526$  (c 0.23, CHCl<sub>3</sub>); <sup>1</sup>H NMR (400 MHz, CDCl<sub>3</sub>) δ 8.15 (d, *J* = 1.9 Hz, 1H), 7.19 (d, *J* = 2.2 Hz, 1H), 7.16 – 7.11 (m, 3H), 6.90 (dd, *J* = 8.2, 2.0 Hz, 1H), 6.87 (dd, *J* = 6.3, 3.1 Hz, 2H), 6.64 (d, *J* = 8.2 Hz, 1H), 5.07 (dd, *J* = 9.3, 7.0 Hz, 2H), 4.99 (d, *J* = 6.8 Hz, 1H), 4.59 (d, *J* = 2.1 Hz, 1H), 4.41 (qd, *J* = 7.1, 3.5 Hz, 2H), 3.87 (d, *J* = 7.0 Hz, 1H), 2.76 (s, 3H), 1.42 (t, *J* = 7.1 Hz, 3H); <sup>13</sup>C NMR (101 MHz, CDCl<sub>3</sub>): δ 177.4, 170.3, 163.3, 145.0, 140.7, 137.7, 135.7, 134.7, 128.6, 127.9, 127.8, 124.9, 124.6, 124.4, 116.9, 76.0, 75.3, 64.4, 61.2, 58.9, 57.3, 26.8, 14.2; HRMS (ESI): *m/z* calcd for C<sub>25</sub>H<sub>23</sub>ClNO<sub>5</sub> [M+H]<sup>+</sup> = 452.1259, found = 452.1259, [M<sup>+</sup>+H]<sup>+</sup> = 454.1259, found = 452.1241; HPLC: The ee value was 85%, *t<sub>R</sub>* (major) = 13.3 min, *t<sub>R</sub>* (minor) = 11.1 min (Chiralpak IA 3, λ = 254 nm, 10% *i*-PrOH/hexane, flow rate = 1.0 mL/min).

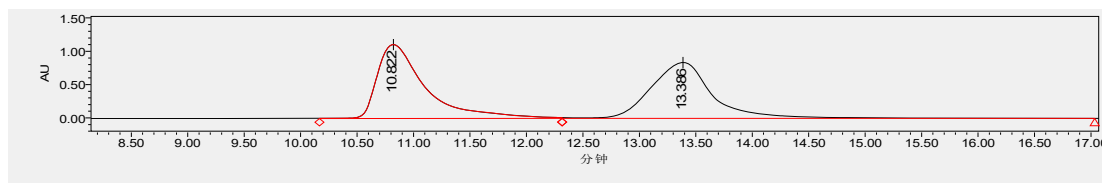

| peak | Retention time (min) | Area (μV*s) | Area (%) | Height  |
|------|----------------------|-------------|----------|---------|
| 1    | 10.822               | 32713443    | 50.71    | 1108964 |
| 2    | 13.386               | 31803165    | 49.29    | 839020  |

Racemic *syn*-6aq

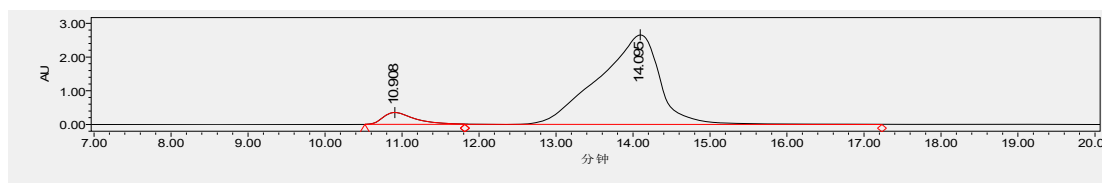

| peak | Retention time (min) | Area (μV*s) | Area (%) | Height  |
|------|----------------------|-------------|----------|---------|
| 1    | 10.908               | 10145672    | 6.49     | 351605  |
| 2    | 14.095               | 146227849   | 93.51    | 2659123 |

Enantiomerically enriched *syn*-6aq

Ethyl

(3*R*,5'*S*)-1-acetyl-5-bromo-2-oxo-5'-phenyldispiro[indoline-3,1'-cyclopentane-2',3''-oxetan]-3'-ene-3'-carboxylate (*syn*-6ar)

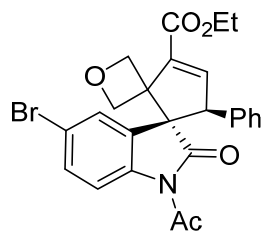

According to the general procedure to afford the mixture of two isomers (90.5 mg, 89% yield), and the title compound was further purified as a white solid; M.p. 190.1 – 193.8 °C;  $[\alpha]_D^{25} = +217.978$  (c 0.27, CHCl<sub>3</sub>); <sup>1</sup>H NMR (400 MHz, CDCl<sub>3</sub>) δ 7.96 (d, *J* = 8.8 Hz, 1H), 7.31 – 7.23 (m, 2H), 7.19 (d, *J* = 1.8 Hz, 1H), 7.15 (d, *J* = 4.1 Hz, 3H), 6.93 – 6.83 (m, 2H), 6.80 (d, *J* = 1.4 Hz, 1H), 5.10 (dd, *J* = 6.8, 3.0 Hz, 2H), 5.00 (d, *J* = 6.8 Hz, 1H), 4.60 (d, *J* = 1.3 Hz, 1H), 4.50 – 4.32 (m, 2H), 3.88 (d, *J* = 7.0 Hz, 1H), 2.75 (s, 3H), 1.43 (t, *J* = 7.1 Hz, 3H); <sup>13</sup>C NMR (101 MHz, CDCl<sub>3</sub>): δ 177.0, 170.3, 163.2, 144.9, 138.8, 137.7, 135.5, 131.9, 128.5, 128.2, 127.9, 127.7, 127.0, 117.8, 117.5, 76.1, 75.3, 64.6, 61.2, 58.8, 57.5, 26.8, 14.2; HRMS (ESI): *m/z* calcd for C<sub>25</sub>H<sub>23</sub>BrNO<sub>5</sub> [M+H]<sup>+</sup> = 496.0754, found = 496.0758, [M\*+H]<sup>+</sup> = 498.0754, found = 498.0742; HPLC: The ee value was 84%, *t<sub>R</sub>* (major) = 13.9 min, *t<sub>R</sub>* (minor) = 12.0 min (Chiralpak IA 3, λ = 254 nm, 7% *i*-PrOH/hexane, flow rate = 1.0 mL/min).

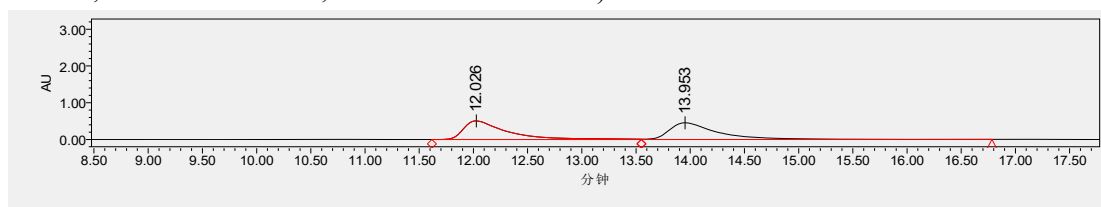

| peak | Retention time (min) | Area (μV*s) | Area (%) | Height |
|------|----------------------|-------------|----------|--------|
| 1    | 12.026               | 13991615    | 50.06    | 506164 |
| 2    | 13.953               | 13955820    | 49.94    | 453342 |

Racemic *syn*-6ar

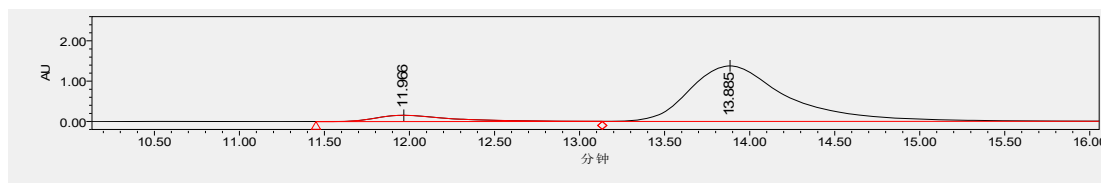

| peak | Retention time (min) | Area (μV*s) | Area (%) | Height  |
|------|----------------------|-------------|----------|---------|
| 1    | 11.966               | 4791403     | 8.01     | 153401  |
| 2    | 13.885               | 55030936    | 91.99    | 1376726 |

Enantiomerically enriched *syn*-6ar

F. General procedure for the synthesis of *anti* isomer with (**R**)-SITCP

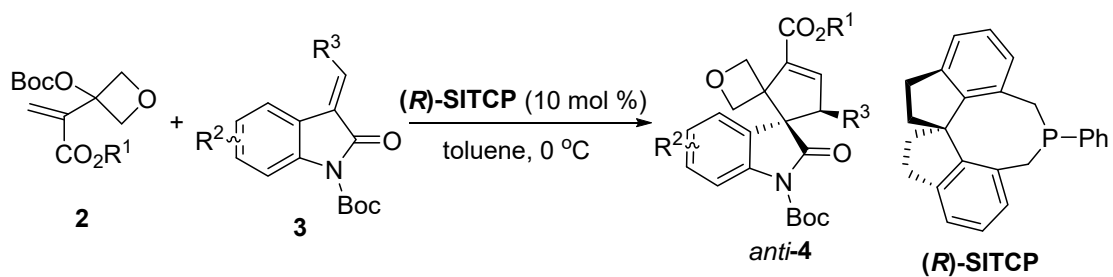

To the solution of oxetane MBH carbonate **2** (0.1 mmol, 1 eq.) and **3** (0.15 mmol, 1.5 eq.) in anhydrous toluene at 0 °C was added (**R**)-SITCP (3.5 mg, 0.01 mmol, 0.1 eq.), and the resulting mixture was stirred overnight. When MBH carbonate **2** was consumed monitored by TLC, the reaction mixture was purified directly by flash column chromatography (hexane/ ethyl acetate = 10/1) to afford a mixture of two isomers. Further purification was carried out via flash column chromatography to get pure *anti* isomer.

## G. Analytic data for the *anti* isomer

1-(*tert*-butyl) 3'-ethyl (3*S*,5*S*)-2-oxo-5'-phenyldispiro[indoline-3,1'-cyclopentane-2',3''-oxetan]-3'-ene-1,3'-dicarboxylate (*anti*-4aa)

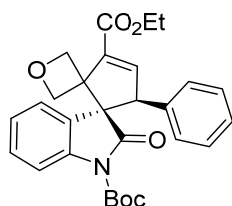

According to the general procedure to afford the mixture of two isomers (38.9 mg, 82% yield), and the title compound was further purified as a foam;  $[\alpha]_D^{25} = -102.985$  (c 0.134, CHCl<sub>3</sub>); <sup>1</sup>H NMR (400 MHz, CDCl<sub>3</sub>) δ 7.83 – 7.76 (m, 1H), 7.40 (ddd, *J* = 10.3, 4.2, 2.2 Hz, 2H), 7.35 – 7.29 (m, 1H), 7.18 – 7.09 (m, 3H), 7.08 (d, *J* = 2.2 Hz, 1H), 6.77 – 6.70 (m, 2H), 5.26 (d, *J* = 7.1 Hz, 1H), 5.08 (d, *J* = 6.5 Hz, 1H), 4.94 (d, *J* = 6.5 Hz, 1H), 4.43 – 4.34 (m, 3H), 4.27 (d, *J* = 2.2 Hz, 1H), 1.42 (s, 12H); <sup>13</sup>C NMR (101 MHz, CDCl<sub>3</sub>): δ 173.25, 163.54, 148.51, 144.05, 140.83, 138.68, 135.62, 129.42, 128.24, 128.02, 127.83, 126.85, 124.89, 124.73, 115.20, 84.03, 78.26, 76.62, 65.80, 60.93, 60.27, 56.60, 27.89, 14.36; HRMS (ESI): *m/z* calcd for C<sub>28</sub>H<sub>30</sub>NO<sub>6</sub> [M+H]<sup>+</sup> = 476.2068, found = 476.2074; HPLC: The ee value was 90%, *t*<sub>R</sub> (major) = 40.73 min, *t*<sub>R</sub> (minor) = 53.00 min (Chiralpak IE 3, λ = 254 nm, 10% *i*-PrOH/hexane, flow rate = 1.0 mL/min).

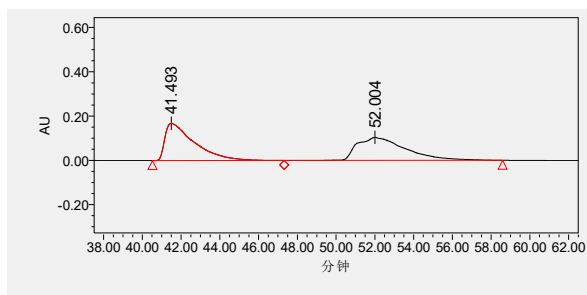

| peak | Retention time (min) | Area (μV*s) | Area (%) | Height (%) |
|------|----------------------|-------------|----------|------------|
| 1    | 41.493               | 17751048    | 49.45    | 168373     |
| 2    | 52.004               | 18142531    | 50.55    | 104343     |

Racemic *anti*-4aa

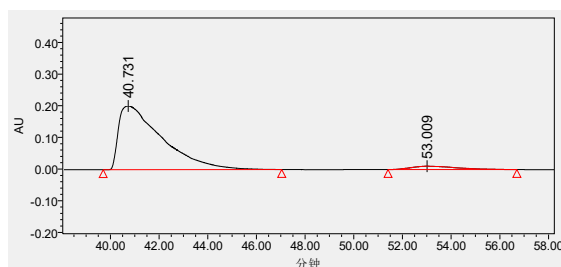

| peak | Retention time (min) | Area (μV*s) | Area (%) | Height (%) |
|------|----------------------|-------------|----------|------------|
| 1    | 40.731               | 24859876    | 94.84    | 201019     |
| 2    | 53.009               | 1352903     | 5.16     | 10472      |

Enantiomerically enriched *anti*-4aa



1-(*tert*-butyl) 3'-methyl (3*S*,5'*S*)-2-oxo-5'-phenyldispiro[indoline-3,1'-cyclopentane-2',3''-oxetan]-3'-ene-1,3'-dicarboxylate (*anti*-4ba)

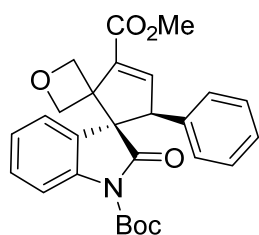

According to the general procedure to afford the mixture of two isomers (43 mg, 94% yield), and the title compound was further purified as a foam;  $[\alpha]_D^{25} = -102.232$  (c 0.224, CHCl<sub>3</sub>); <sup>1</sup>H NMR (400 MHz, CDCl<sub>3</sub>) δ 7.83 – 7.76 (m, 1H), 7.40 (ddd, *J* = 7.3, 4.2, 2.6 Hz, 2H), 7.36 – 7.28 (m, 1H), 7.22 – 7.07 (m, 4H), 6.77 – 6.69 (m, 2H), 5.25 (d, *J* = 7.1 Hz, 1H), 5.09 (d, *J* = 6.5 Hz, 1H), 4.93 (d, *J* = 6.5 Hz, 1H), 4.36 (d, *J* = 7.1 Hz, 1H), 4.27 (d, *J* = 2.2 Hz, 1H), 3.92 (s, 3H), 1.42 (s, 9H); <sup>13</sup>C NMR (101 MHz, CDCl<sub>3</sub>): δ 173.21, 163.96, 148.50, 144.40, 140.84, 138.46, 135.54, 129.46, 128.26, 128.02, 127.86, 126.75, 124.87, 124.74, 115.23, 84.06, 78.21, 76.60, 65.77, 60.27, 56.58, 51.96, 27.89; HRMS (ESI): *m/z* calcd for C<sub>27</sub>H<sub>28</sub>NO<sub>6</sub> [M+H]<sup>+</sup> = 462.1911, found = 462.1918; HPLC: The ee value was 91%, *t<sub>R</sub>* (major) = 22.32 min, *t<sub>R</sub>* (minor) = 30.13 min (Chiralpak IE 3, λ = 254 nm, 20% *i*-PrOH/hexane, flow rate = 1.0 mL/min).

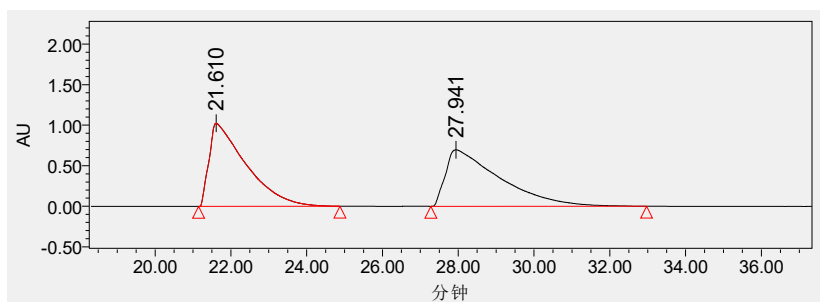

| peak | Retention time (min) | Area (μV*s) | Area (%) | Height (%) |
|------|----------------------|-------------|----------|------------|
| 1    | 21.610               | 69300013    | 50.01    | 1024398    |
| 2    | 27.941               | 69273442    | 49.99    | 696592     |

Racemic *anti*-4ba

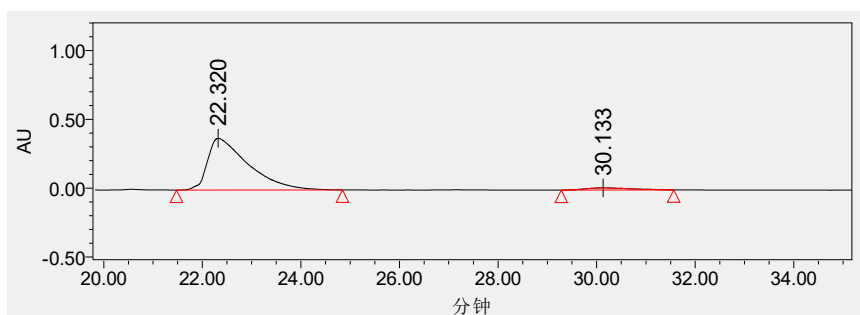

| peak | Retention time (min) | Area (μV*s) | Area (%) | Height (%) |
|------|----------------------|-------------|----------|------------|
| 1    | 22.320               | 21517230    | 95.70    | 376148     |
| 2    | 30.133               | 967446      | 4.30     | 15661      |

Enantiomerically enriched *anti*-4ba

3'-benzyl 1-(tert-butyl) (3*S*,5'*S*)-2-oxo-5'-phenyldispiro[indoline-3,1'-cyclopentane-2',3''-oxetan]-3'-ene-1,3'-dicarboxylate (*anti*-4ca)

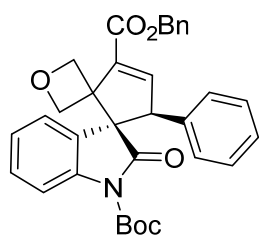

According to the general procedure to afford the mixture of two isomers (16 mg, 29% yield), and the title compound was further purified as a foam;  $[\alpha]_D^{25} = -39.362$  (c 0.282, CHCl<sub>3</sub>); **<sup>1</sup>H NMR** (400 MHz, CDCl<sub>3</sub>) δ 7.80 (d, J = 8.0 Hz, 1H), 7.49 (d, J = 6.9 Hz, 2H), 7.43 – 7.32 (m, 6H), 7.20 – 7.08 (m, 4H), 6.76 – 6.69 (m, 2H), 5.44 (d, J = 12.4 Hz, 1H), 5.35 – 5.26 (m, 2H), 5.11 (d, J = 6.6 Hz, 1H), 4.95 (d, J = 6.5 Hz, 1H), 4.38 (d, J = 7.1 Hz, 1H), 4.27 (d, J = 2.2 Hz, 1H), 1.42 (s, 9H); **<sup>13</sup>C NMR** (101 MHz, CDCl<sub>3</sub>): <sup>13</sup>C NMR (101 MHz, CDCl<sub>3</sub>) δ 173.22, 163.30, 148.50, 144.72, 140.86, 138.40, 135.86, 135.49, 129.46, 128.69, 128.46, 128.38, 128.25, 128.04, 127.87, 126.77, 124.88, 124.74, 115.24, 84.08, 78.25, 76.60, 66.66, 65.80, 60.36, 56.61, 27.89; **HRMS** (ESI): m/z calcd for C<sub>33</sub>H<sub>32</sub>NO<sub>6</sub> [M+H]<sup>+</sup> = 538.2224, found = 538.2230; **HPLC**: The ee value was 92%, t<sub>R</sub> (major) = 30.38 min, t<sub>R</sub> (minor) = 17.40 min (Chiralpak IC 3, λ = 254 nm, 40% *i*-PrOH/hexane, flow rate = 1.0 mL/min).

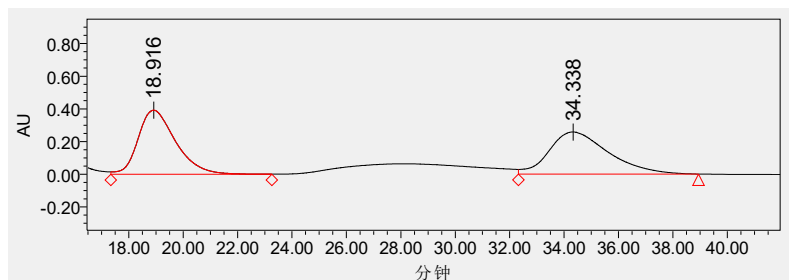

| peak | Retention time (min) | Area (μV*s) | Area (%) | Height (%) |
|------|----------------------|-------------|----------|------------|
| 1    | 18.916               | 37564445    | 48.96    | 392144     |
| 2    | 34.338               | 39155398    | 51.04    | 257159     |

Racemic *anti*-4ca

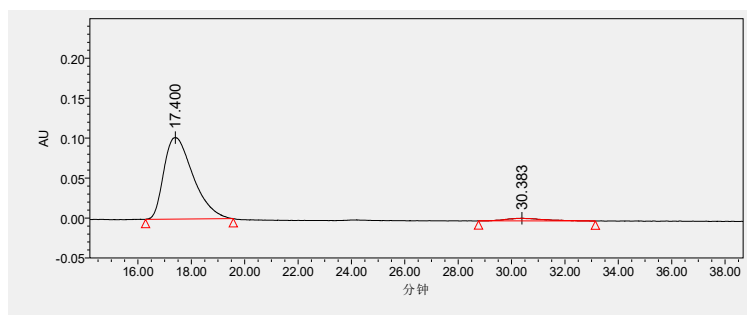

| peak | Retention time (min) | Area (μV*s) | Area (%) | Height (%) |
|------|----------------------|-------------|----------|------------|
| 1    | 17.400               | 7775312     | 95.99    | 101970     |
| 2    | 30.383               | 324490      | 4.01     | 3330       |

Enantiomerically enriched *anti*-4ca

*Ethyl (3S,5'S)-1-acetyl-2-oxo-5'-phenyldispiro[indoline-3,1'-cyclopentane-2',3''-oxetan]-3'-ene-3'-carboxylate (anti-6aa)*

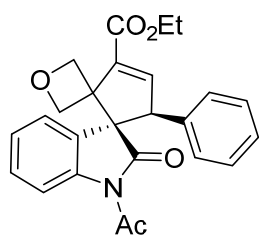

According to the general procedure to afford the mixture of two isomers (32.5 mg, 78% yield), and the title compound was further purified as a foam;  $[\alpha]_D^{25} = -105.814$  (c 0.172, CHCl<sub>3</sub>); <sup>1</sup>H NMR (400 MHz, CDCl<sub>3</sub>) δ 8.17 (dd, J = 7.5, 1.4 Hz, 1H), 7.47 – 7.34 (m, 3H), 7.24 – 7.08 (m, 4H), 6.72 (dd, J = 6.9, 1.6 Hz, 2H), 5.24 (d, J = 7.0 Hz, 1H), 5.03 (d, J = 6.6 Hz, 1H), 4.96 (d, J = 6.6 Hz, 1H), 4.42 (qd, J = 7.1, 4.2 Hz, 2H), 4.35 (d, J = 7.0 Hz, 1H), 4.31 (d, J = 2.2 Hz, 1H), 2.17 (s, 3H), 1.42 (t, J = 7.1 Hz, 3H); <sup>13</sup>C NMR (101 MHz, CDCl<sub>3</sub>): δ 176.01, 170.23, 163.48, 143.77, 140.92, 138.83, 135.59, 129.62, 128.37, 128.17, 127.89, 127.40, 125.59, 124.56, 116.67, 77.95, 76.51, 65.63, 61.07, 60.39, 56.83, 26.10, 14.34; HRMS (ESI): m/z calcd for C<sub>25</sub>H<sub>23</sub>NO<sub>5</sub> [M+H]<sup>+</sup> = 418.1649, found = 418.1660; HPLC: The ee value was 84%, t<sub>R</sub> (major) = 27.98 min, t<sub>R</sub> (minor) = 37.19 min (Chiralpak IE 3, λ = 254 nm, 20% *i*-PrOH/hexane, flow rate = 1.0 mL/min).

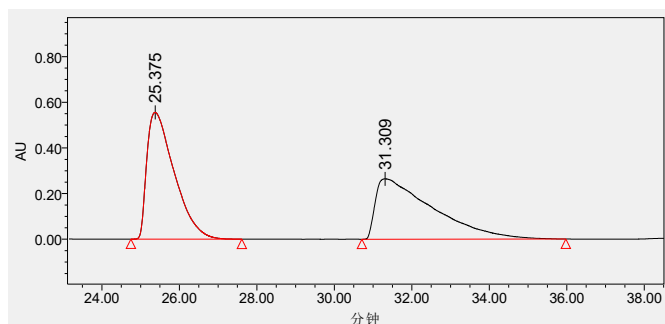

| peak | Retention time (min) | Area (μV*s) | Area (%) | Height (%) |
|------|----------------------|-------------|----------|------------|
| 1    | 25.375               | 27258441    | 49.95    | 555141     |
| 2    | 31.309               | 27318158    | 50.05    | 264459     |

Racemic *anti-6aa*

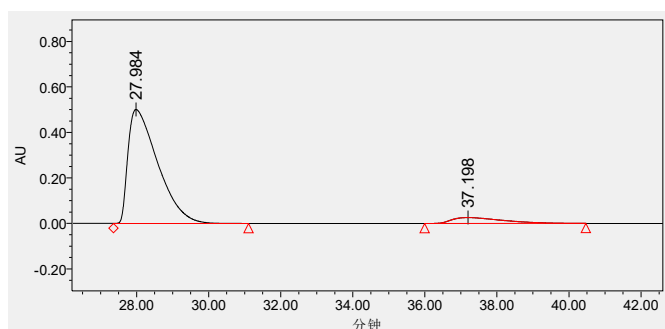

| peak | Retention time (min) | Area (μV*s) | Area (%) | Height (%) |
|------|----------------------|-------------|----------|------------|
| 1    | 27.984               | 28751358    | 91.80    | 501011     |
| 2    | 37.198               | 2567482     | 8.20     | 26152      |

Enantiomerically enriched *anti-6aa*

*Ethyl (3S,5'S)-2-oxo-5'-phenyl-1-tosylspiro[indoline-3,1'-cyclopentane-2',3''-oxetan]-3'-ene-3'-carboxylate (anti-8aa)*

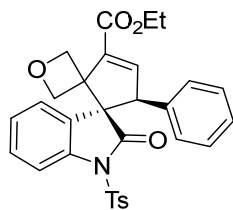

According to the general procedure to afford the mixture of two isomers (40 mg, 77% yield), and the title compound was further purified as a foam;  $[\alpha]^{25}_{\text{D}} = -97.26$  (c 0.146,  $\text{CHCl}_3$ );  $^1\text{H NMR}$  (400 MHz,  $\text{CDCl}_3$ )  $\delta$  7.92 (d,  $J = 8.1$  Hz, 1H), 7.62 (d,  $J = 8.3$  Hz, 2H), 7.46 (ddd,  $J = 8.4, 6.8, 2.1$  Hz, 1H), 7.41 – 7.33 (m, 2H), 7.16 (d,  $J = 8.2$  Hz, 2H), 7.10 – 7.02 (m, 2H), 6.97 (t,  $J = 7.6$  Hz, 2H), 6.64 – 6.57 (m, 2H), 5.04 (d,  $J = 7.2$  Hz, 1H), 4.94 (d,  $J = 6.6$  Hz, 1H), 4.86 (d,  $J = 6.6$  Hz, 1H), 4.36 (qd,  $J = 7.1, 1.4$  Hz, 2H), 4.24 (d,  $J = 2.2$  Hz, 1H), 3.93 (d,  $J = 7.2$  Hz, 1H), 2.40 (s, 3H), 1.38 (t,  $J = 7.1$  Hz, 3H);  $^{13}\text{C NMR}$  (101 MHz,  $\text{CDCl}_3$ ):  $\delta$  173.42, 163.40, 145.37, 144.23, 140.18, 138.02, 135.05, 134.88, 130.01, 129.71, 128.26, 127.78, 126.82, 125.47, 125.15, 113.99, 77.06, 76.58, 65.23, 60.99, 59.07, 57.18, 21.76, 14.33; **HRMS** (ESI):  $m/z$  calcd for  $\text{C}_{30}\text{H}_{28}\text{NO}_6\text{S} [\text{M}+\text{H}]^+$  = 530.1632, found = 530.1641; **HPLC**: The ee value was 81%,  $t_{\text{R}}$  (major) = 37.08 min,  $t_{\text{R}}$  (minor) = 28.14 min (Chiralpak IE 3,  $\lambda = 254$  nm, 30% *i*-PrOH/hexane, flow rate = 1.0 mL/min).

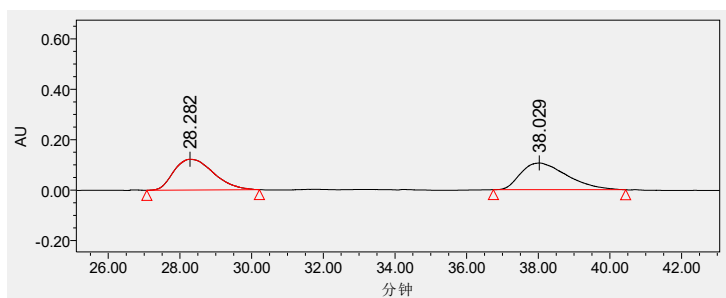

| peak | Retention time (min) | Area ( $\mu\text{V}\cdot\text{s}$ ) | Area (%) | Height (%) |
|------|----------------------|-------------------------------------|----------|------------|
| 1    | 28.282               | 9389732                             | 49.80    | 122426     |
| 2    | 38.029               | 9464768                             | 50.20    | 105707     |

Racemic *anti-8aa*

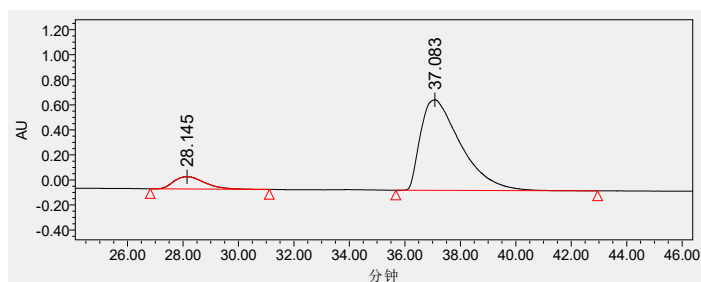

| peak | Retention time (min) | Area ( $\mu\text{V}\cdot\text{s}$ ) | Area (%) | Height (%) |
|------|----------------------|-------------------------------------|----------|------------|
| 1    | 28.145               | 7607231                             | 9.47     | 97458      |
| 2    | 37.083               | 72762860                            | 90.53    | 722535     |

Enantiomerically enriched *anti-8aa*

1-benzyl 3'-ethyl (3*S*,5'*S*)-2-oxo-5'-phenyldispiro[indoline-3,1'-cyclopentane-2',3''-oxetan]-3'-ene-1,3'-dicarboxylate (*anti*-10aa)

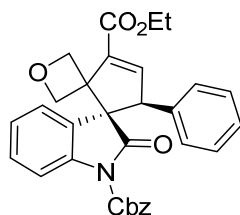

According to the general procedure to afford the mixture of two isomers (38 mg, 76% yield), and the title compound was further purified as a foam;  $[\alpha]_D^{25} = +4.386$  (c 0.114, CHCl<sub>3</sub>); <sup>1</sup>H NMR (400 MHz, CDCl<sub>3</sub>) δ 7.90 – 7.83 (m, 1H), 7.45 – 7.30 (m, 6H), 7.29 – 7.24 (m, 2H), 7.09 (qd, *J* = 7.3, 3.7 Hz, 4H), 6.74 (d, *J* = 7.1 Hz, 2H), 5.31 – 5.23 (m, 2H), 5.18 (d, *J* = 12.5 Hz, 1H), 5.03 (d, *J* = 6.6 Hz, 1H), 4.95 (d, *J* = 6.6 Hz, 1H), 4.40 (ddd, *J* = 17.0, 8.5, 4.7 Hz, 3H), 4.29 (d, *J* = 2.1 Hz, 1H), 1.41 (t, *J* = 7.2 Hz, 3H); <sup>13</sup>C NMR (101 MHz, CDCl<sub>3</sub>): δ 173.04, 163.53, 150.11, 144.05, 140.28, 138.58, 135.46, 134.92, 129.59, 128.59, 128.34, 128.01, 127.92, 127.73, 127.08, 125.13, 124.81, 115.45, 77.98, 76.53, 68.30, 65.69, 60.99, 60.14, 56.97, 14.34; HRMS (ESI): *m/z* calcd for C<sub>31</sub>H<sub>28</sub>NO<sub>6</sub> [M+H]<sup>+</sup> = 510.1911, found = 510.1914; HPLC: The ee value was 89%, *t*<sub>R</sub> (major) = 29.46 min, *t*<sub>R</sub> (minor) = 36.77 min (Chiralpak IE 3, λ = 254 nm, 30% *i*-PrOH/hexane, flow rate = 1.0 mL/min).

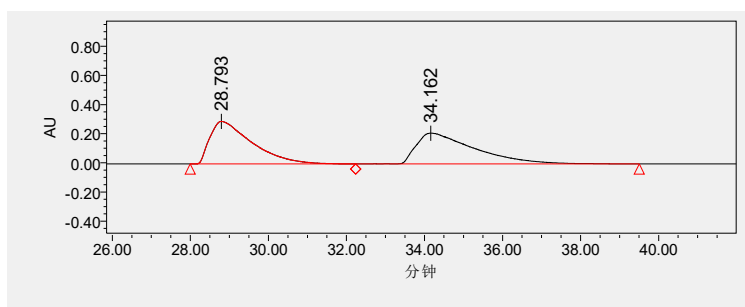

| peak | Retention time (min) | Area (μV*s) | Area (%) | Height (%) |
|------|----------------------|-------------|----------|------------|
| 1    | 28.793               | 21883297    | 49.90    | 292137     |
| 2    | 34.162               | 21975015    | 50.10    | 210996     |

Racemic *anti*-10aa

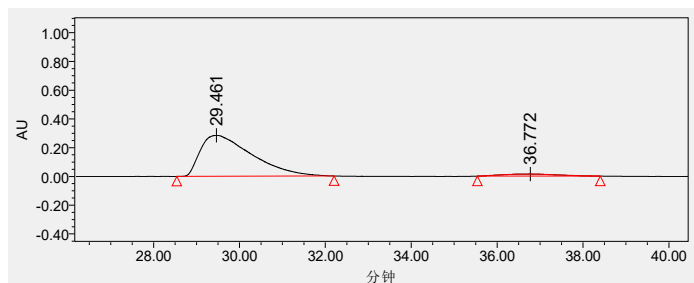

| peak | Retention time (min) | Area (μV*s) | Area (%) | Height (%) |
|------|----------------------|-------------|----------|------------|
| 1    | 29.461               | 23785076    | 94.73    | 284879     |
| 2    | 36.772               | 1323458     | 5.27     | 14473      |

Enantiomerically enriched *anti*-10aa

*Ethyl (3S,5'S)-1-benzoyl-2-oxo-5'-phenyldispiro[indoline-3,1'-cyclopentane-2',3''-oxetan]-3'-ene-3'-carboxylate (anti-12aa)*

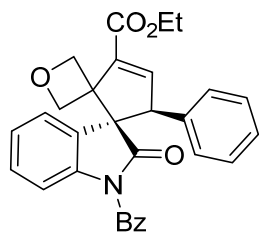

According to the general procedure to afford the mixture of two isomers (38 mg, 81% yield), and the title compound was further purified as a foam;  $[\alpha]_D^{25} = -190.341$  (c 0.176,  $\text{CHCl}_3$ );  $^1\text{H NMR}$  (400 MHz,  $\text{CDCl}_3$ )  $\delta$  7.76 (d,  $J = 8.2$  Hz, 1H), 7.54 – 7.40 (m, 4H), 7.32 (dt,  $J = 14.2, 7.0$  Hz, 3H), 7.22 (t,  $J = 7.6$  Hz, 2H), 7.11 (d,  $J = 1.9$  Hz, 1H), 6.89 – 6.82 (m, 2H), 6.76 (d,  $J = 7.7$  Hz, 2H), 5.17 (d,  $J = 7.1$  Hz, 1H), 5.09 (d,  $J = 6.5$  Hz, 1H), 4.93 (d,  $J = 6.5$  Hz, 1H), 4.45 (d,  $J = 2.1$  Hz, 1H), 4.40 – 4.28 (m, 3H), 1.37 (t,  $J = 7.1$  Hz, 3H);  $^{13}\text{C NMR}$  (101 MHz,  $\text{CDCl}_3$ ):  $\delta$  174.79, 168.88, 163.39, 143.61, 141.16, 138.66, 136.35, 133.52, 132.83, 129.76, 129.30, 128.75, 128.24, 128.10, 127.99, 127.56, 125.39, 125.26, 115.13, 77.85, 76.75, 65.84, 60.96, 59.17, 57.34, 14.33; **HRMS** (ESI):  $m/z$  calcd for  $\text{C}_{30}\text{H}_{26}\text{NO}_5$   $[\text{M}+\text{H}]^+ = 480.1805$ , found = 480.1807; **HPLC**: The ee value was 86%,  $t_R$  (major) = 44.94 min,  $t_R$  (minor) = 36.18 min (Chiralpak IE 3,  $\lambda = 254$  nm, 30% *i*-PrOH/hexane, flow rate = 1.0 mL/min).

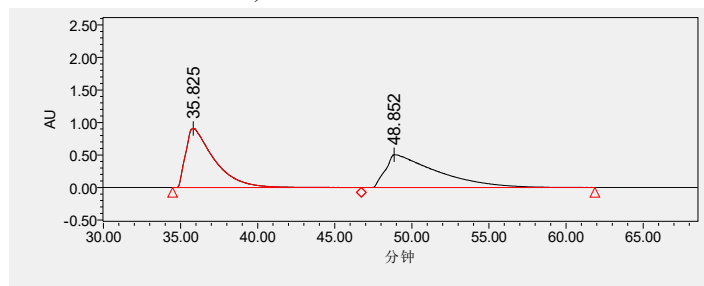

| peak | Retention time (min) | Area ( $\mu\text{V}\cdot\text{s}$ ) | Area (%) | Height (%) |
|------|----------------------|-------------------------------------|----------|------------|
| 1    | 35.825               | 116060269                           | 49.83    | 908495     |
| 2    | 48.852               | 116847460                           | 50.17    | 504941     |

Racemic *anti-12aa*

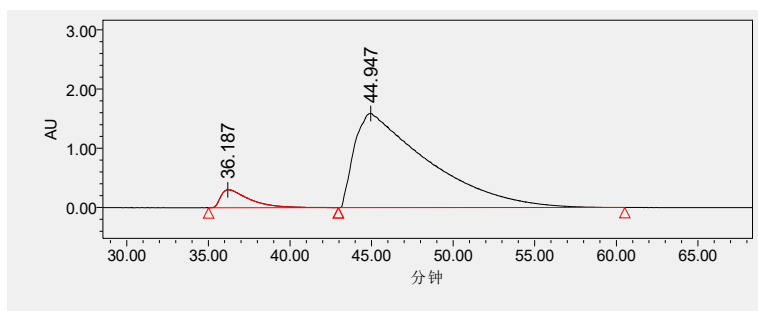

| peak | Retention time (min) | Area ( $\mu\text{V}\cdot\text{s}$ ) | Area (%) | Height (%) |
|------|----------------------|-------------------------------------|----------|------------|
| 1    | 36.187               | 36448314                            | 6.83     | 303119     |
| 2    | 44.947               | 497400566                           | 93.17    | 1588407    |

Enantiomerically enriched *anti-12aa*

1-(*tert*-butyl) 3'-methyl (3*S*,5'*S*)-5'-(3-nitrophenyl)-2-oxodispiro[indoline-3,1'-cyclopentane-2',3''-oxetan]-3'-ene-1,3'-dicarboxylate (*anti*-4bb)

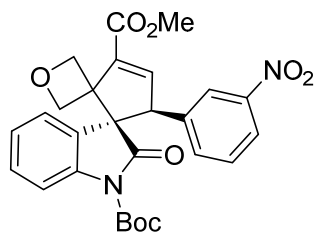

According to the general procedure to afford the mixture of two isomers (45 mg, 90% yield), and the title compound was further purified as a foam;  $[\alpha]_D^{25} = -147.619$  (c 0.126, CHCl<sub>3</sub>); <sup>1</sup>H NMR (400 MHz, CDCl<sub>3</sub>) δ 8.06 (ddd, *J* = 8.3, 2.3, 1.0 Hz, 1H), 7.81 – 7.74 (m, 1H), 7.62 (t, *J* = 2.0 Hz, 1H), 7.43 (ddd, *J* = 10.2, 6.9, 1.9 Hz, 2H), 7.38 – 7.30 (m, 2H), 7.10 – 7.04 (m, 2H), 5.31 – 5.20 (m, 1H), 4.99 (d, *J* = 6.7 Hz, 1H), 4.94 (d, *J* = 6.7 Hz, 1H), 4.43 – 4.34 (m, 2H), 3.94 (s, 3H), 1.41 (s, 9H); <sup>13</sup>C NMR (101 MHz, CDCl<sub>3</sub>): δ 172.85, 163.64, 148.21, 148.06, 142.38, 140.45, 139.56, 137.90, 134.20, 129.99, 129.31, 126.18, 125.17, 124.61, 123.08, 122.95, 115.37, 84.65, 77.71, 76.29, 65.27, 59.38, 56.90, 52.16, 27.86; HRMS (ESI): *m/z* calcd for C<sub>27</sub>H<sub>27</sub>N<sub>2</sub>O<sub>8</sub> [M+H]<sup>+</sup> = 507.1762, found = 507.1771; HPLC: The ee value was 93%, *t<sub>R</sub>* (major) = 41.80 min, *t<sub>R</sub>* (minor) = 54.81 min (Chiralpak IE 3, λ = 254 nm, 20% *i*-PrOH/hexane, flow rate = 1.0 mL/min).

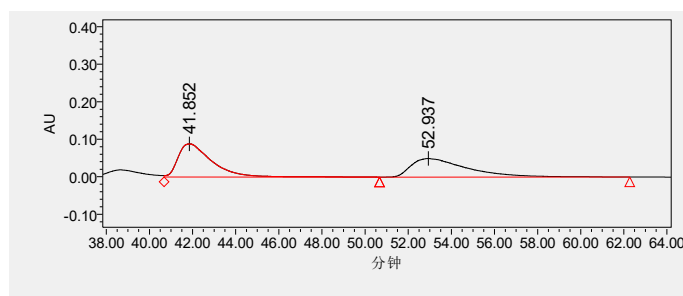

| peak | Retention time (min) | Area (μV*s) | Area (%) | Height (%) |
|------|----------------------|-------------|----------|------------|
| 1    | 41.852               | 9672971     | 52.04    | 88256      |
| 2    | 52.937               | 8914605     | 47.96    | 49569      |

Racemic *anti*-4bb

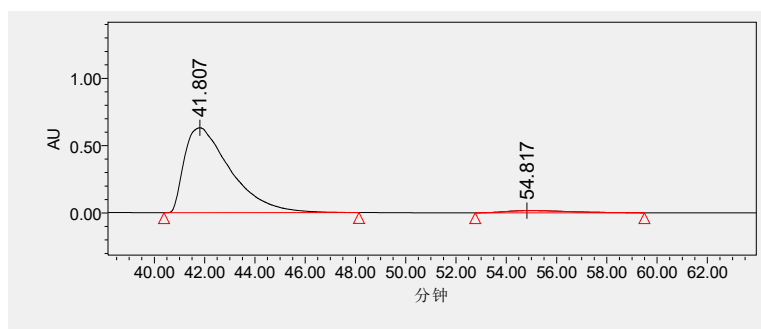

| peak | Retention time (min) | Area (μV*s) | Area (%) | Height (%) |
|------|----------------------|-------------|----------|------------|
| 1    | 41.807               | 80516202    | 96.64    | 630792     |
| 2    | 54.817               | 2798287     | 3.36     | 15910      |

Enantiomerically enriched *anti*-4bb

1-(*tert*-butyl) 3'-methyl (3*S*,5'*S*)-2-oxo-5'-(*p*-tolyl)dispiro[indoline-3,1'-cyclopentane-2',3''-oxetan]-3'-ene-1,3'-dicarboxylate (*anti*-4bc)

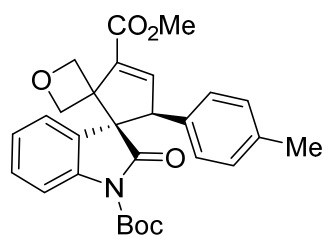

According to the general procedure to afford the mixture of two isomers (42 mg, 89% yield), and the title compound was further purified as a foam;  $[\alpha]_D^{25} = -116.901$  (c 0.142, CHCl<sub>3</sub>); <sup>1</sup>H NMR (400 MHz, CDCl<sub>3</sub>) δ 7.80 (d, *J* = 8.1 Hz, 1H), 7.44 – 7.36 (m, 2H), 7.36 – 7.28 (m, 1H), 7.08 (d, *J* = 2.1 Hz, 1H), 6.93 (d, *J* = 7.8 Hz, 2H), 6.61 (d, *J* = 8.1 Hz, 2H), 5.25 (d, *J* = 7.2 Hz, 1H), 5.09 (d, *J* = 6.5 Hz, 1H), 4.93 (d, *J* = 6.5 Hz, 1H), 4.37 (d, *J* = 7.2 Hz, 1H), 4.23 (d, *J* = 2.2 Hz, 1H), 3.92 (s, 3H), 2.23 (s, 3H), 1.42 (s, 9H); <sup>13</sup>C NMR (101 MHz, CDCl<sub>3</sub>): δ 173.28, 164.01, 148.55, 144.67, 140.83, 138.32, 137.47, 132.44, 129.37, 128.94, 127.89, 126.90, 124.83, 124.70, 115.22, 83.98, 78.28, 76.61, 65.80, 60.09, 56.50, 51.94, 27.86, 21.04; HRMS (ESI): *m/z* calcd for C<sub>28</sub>H<sub>30</sub>NO<sub>6</sub> [M+H]<sup>+</sup> = 476.2068, found = 476.2076; HPLC: The ee value was 93%, *t*<sub>R</sub> (major) = 24.45 min, *t*<sub>R</sub> (minor) = 40.59 min (Chiralpak IE 3, λ = 254 nm, 20% *i*-PrOH/hexane, flow rate = 1.0 mL/min).

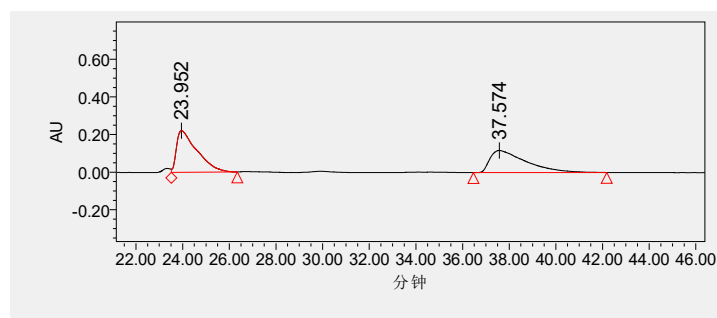

| peak | Retention time (min) | Area (μV*s) | Area (%) | Height (%) |
|------|----------------------|-------------|----------|------------|
| 1    | 23.952               | 13545552    | 51.83    | 221256     |
| 2    | 37.574               | 12590911    | 48.17    | 117678     |

Racemic *anti*-4bc

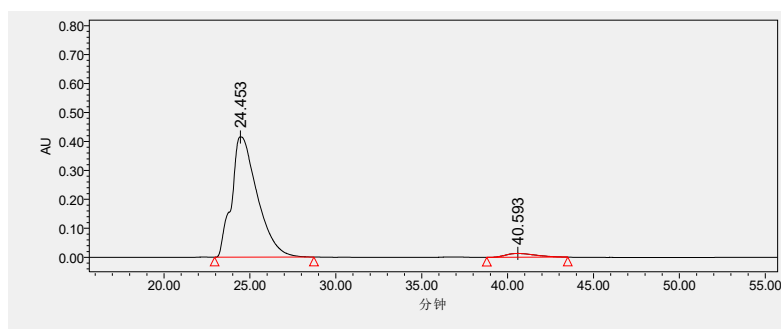

| peak | Retention time (min) | Area (μV*s) | Area (%) | Height (%) |
|------|----------------------|-------------|----------|------------|
| 1    | 24.453               | 43332776    | 96.42    | 415099     |
| 2    | 40.593               | 1607900     | 3.58     | 13402      |

Enantiomerically enriched *anti*-4bc



1-(*tert*-butyl) 3'-methyl (3*S*,5'*S*)-5'-(4-methoxyphenyl)-2-oxodispiro[indoline-3,1'-cyclopentane-2',3''-oxetan]-3'-ene-1,3'-dicarboxylate (*anti*-4bd)

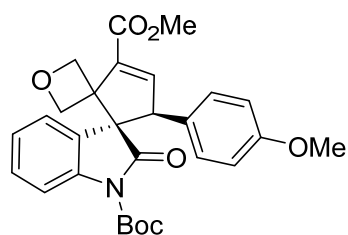

According to the general procedure to afford the mixture of two isomers (43 mg, 89% yield), and the title compound was further purified as a foam;  $[\alpha]_{\text{D}}^{25} = -126.316$  (c 0.190,  $\text{CHCl}_3$ );  $^1\text{H NMR}$  (400 MHz,  $\text{CDCl}_3$ )  $\delta$  7.82 – 7.75 (m, 1H), 7.42 – 7.35 (m, 2H), 7.35 – 7.24 (m, 1H), 7.05 (d,  $J = 2.1$  Hz, 1H), 6.64 (s, 4H), 5.24 (d,  $J = 7.1$  Hz, 1H), 5.07 (d,  $J = 6.5$  Hz, 1H), 4.91 (d,  $J = 6.5$  Hz, 1H), 4.35 (d,  $J = 7.1$  Hz, 1H), 4.22 (d,  $J = 2.2$  Hz, 1H), 3.90 (s, 3H), 3.69 (s, 3H), 1.45 – 1.40 (m, 9H);  $^{13}\text{C NMR}$  (101 MHz,  $\text{CDCl}_3$ ):  $\delta$  173.39, 163.99, 159.21, 148.52, 144.80, 140.80, 138.14, 129.37, 129.13, 127.48, 126.89, 124.85, 124.72, 115.21, 113.61, 84.03, 78.26, 76.60, 65.82, 59.73, 56.45, 55.13, 51.93, 27.87; **HRMS** (ESI):  $m/z$  calcd for  $\text{C}_{28}\text{H}_{30}\text{NO}_7$   $[\text{M}+\text{H}]^+ = 492.2017$ , found = 492.2028; **HPLC**: The ee value was 91%,  $t_{\text{R}}$  (major) = 42.42 min,  $t_{\text{R}}$  (minor) = 64.87 min (Chiralpak IE 3,  $\lambda = 254$  nm, 20% *i*-PrOH/hexane, flow rate = 1.0 mL/min).

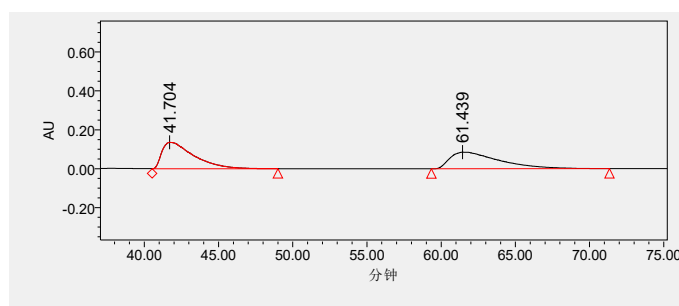

| peak | Retention time (min) | Area ( $\mu\text{V}\cdot\text{s}$ ) | Area (%) | Height (%) |
|------|----------------------|-------------------------------------|----------|------------|
| 1    | 41.704               | 20224615                            | 50.55    | 135899     |
| 2    | 61.439               | 19787005                            | 49.45    | 85366      |

Racemic *anti*-4bd

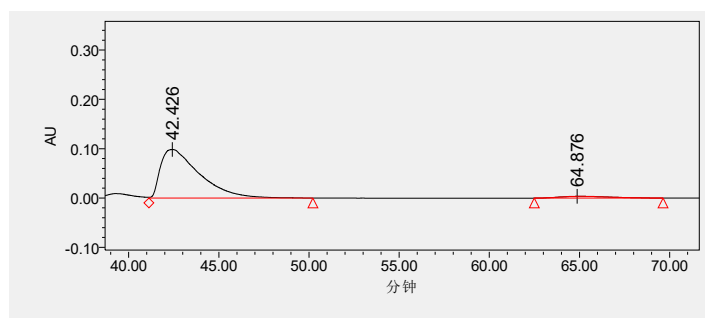

| peak | Retention time (min) | Area ( $\mu\text{V}\cdot\text{s}$ ) | Area (%) | Height (%) |
|------|----------------------|-------------------------------------|----------|------------|
| 1    | 42.426               | 14716660                            | 95.52    | 98400      |
| 2    | 64.876               | 690413                              | 4.48     | 3561       |

Enantiomerically enriched *anti*-4bd

1-(*tert*-butyl) 3'-methyl (3*S*,5'*S*)-5'-(4-fluorophenyl)-2-oxodispiro[indoline-3,1'-cyclopentane-2',3'-oxetan]-3'-ene-1,3'-dicarboxylate (***anti*-4be**)

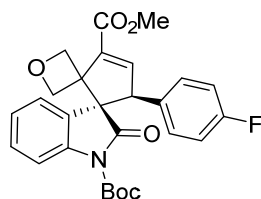

According to the general procedure to afford the mixture of two isomers (43 mg, 91% yield), and the title compound was further purified as a foam;  $[\alpha]^{25}_D = -105.926$  (c 0.270, CHCl<sub>3</sub>); <sup>1</sup>H NMR (400 MHz, CDCl<sub>3</sub>) δ 7.81 – 7.74 (m, 1H), 7.43 – 7.35 (m, 2H), 7.31 (td, *J* = 7.3, 1.1 Hz, 1H), 7.02 (d, *J* = 2.2 Hz, 1H), 6.85 – 6.73 (m, 2H), 6.73 – 6.62 (m, 2H), 5.23 (d, *J* = 7.1 Hz, 1H), 5.05 (d, *J* = 6.6 Hz, 1H), 4.90 (d, *J* = 6.5 Hz, 1H), 4.33 (d, *J* = 7.1 Hz, 1H), 4.24 (d, *J* = 2.2 Hz, 1H), 3.90 (s, 3H), 1.42 (s, 9H); <sup>13</sup>C NMR (101 MHz, CDCl<sub>3</sub>): δ 173.24, 163.86, 162.44 (d, *J*<sub>C-F</sub> = 246.7 Hz) 148.37, 143.97, 140.73, 138.55, 131.36 (d, *J*<sub>C-F</sub> = 3.0 Hz), 129.69 (d, *J*<sub>C-F</sub> = 8.1 Hz), 129.56, 126.53, 124.87, 124.84, 115.21, 115.14 (d, *J*<sub>C=C</sub> = 21.3 Hz), 84.27, 78.10, 76.50, 65.74, 59.47, 56.54, 51.97, 27.86; HRMS (ESI): *m/z* calcd for C<sub>27</sub>H<sub>27</sub>FNO<sub>6</sub> [M+H]<sup>+</sup> = 480.1817, found = 480.1823; HPLC: The ee value was 91%, *t*<sub>R</sub> (major) = 23.52 min, *t*<sub>R</sub> (minor) = 28.37 min (Chiralpak IE 3, λ = 254 nm, 20% *i*-PrOH/hexane, flow rate = 1.0 mL/min).

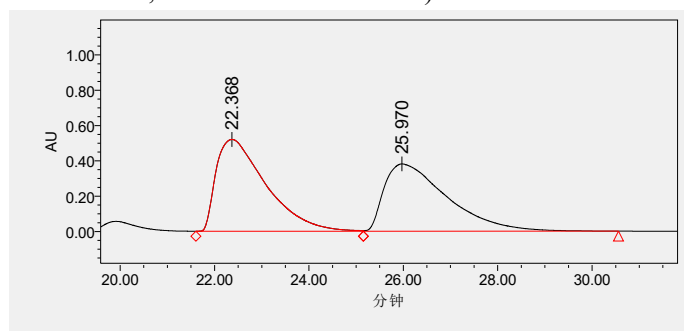

| peak | Retention time (min) | Area (μV*s) | Area (%) | Height (%) |
|------|----------------------|-------------|----------|------------|
| 1    | 22.368               | 38183879    | 51.99    | 519795     |
| 2    | 25.970               | 35254450    | 48.01    | 381108     |

Racemic ***anti*-4be**

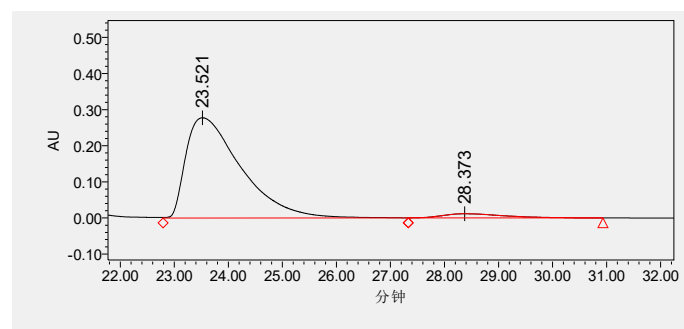

| peak | Retention time (min) | Area (μV*s) | Area (%) | Height (%) |
|------|----------------------|-------------|----------|------------|
| 1    | 23.521               | 19670549    | 95.49    | 277470     |
| 2    | 28.373               | 929138      | 4.51     | 11766      |

Enantiomerically enriched ***anti*-4be**

1-(*tert*-butyl) 3'-methyl (3*S*,5'*S*)-5'-(4-chlorophenyl)-2-oxodispiro[indoline-3,1'-cyclopentane-2',3''-oxetan]-3'-ene-1,3'-dicarboxylate (*anti*-4bf)

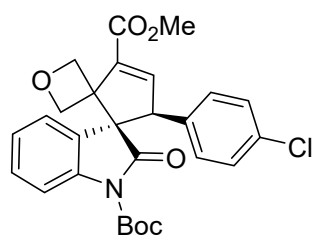

According to the general procedure to afford the mixture of two isomers (35 mg, 71% yield), and the title compound was further purified as a foam;  $[\alpha]_D^{25} = -101.247$  (c 0.401, CHCl<sub>3</sub>); <sup>1</sup>H NMR (400 MHz, CDCl<sub>3</sub>) δ 7.79 (dd, *J* = 8.1, 1.2 Hz, 1H), 7.40 (ddd, *J* = 10.0, 7.1, 1.7 Hz, 2H), 7.32 (td, *J* = 7.4, 1.1 Hz, 1H), 7.12 – 7.06 (m, 2H), 7.02 (d, *J* = 2.0 Hz, 1H), 6.69 – 6.61 (m, 2H), 5.23 (d, *J* = 7.1 Hz, 1H), 5.07 (d, *J* = 6.5 Hz, 1H), 4.91 (d, *J* = 6.5 Hz, 1H), 4.33 (d, *J* = 7.1 Hz, 1H), 4.23 (d, *J* = 2.2 Hz, 1H), 3.91 (s, 3H), 1.44 (s, 9H); <sup>13</sup>C NMR (101 MHz, CDCl<sub>3</sub>): δ 173.17, 163.81, 148.36, 143.57, 140.77, 138.85, 134.09, 133.88, 129.64, 129.36, 128.42, 126.41, 124.88, 115.26, 84.36, 78.13, 76.51, 65.74, 59.56, 56.55, 52.02, 27.88; HRMS (ESI): *m/z* calcd for C<sub>27</sub>H<sub>27</sub>ClNO<sub>6</sub> [M+H]<sup>+</sup> = 496.1521, found = 496.1529; HPLC: The ee value was 94%, *t*<sub>R</sub> (major) = 20.77 min, *t*<sub>R</sub> (minor) = 26.77 min (Chiralpak IE 3, λ = 254 nm, 20% *i*-PrOH/hexane, flow rate = 1.0 mL/min).

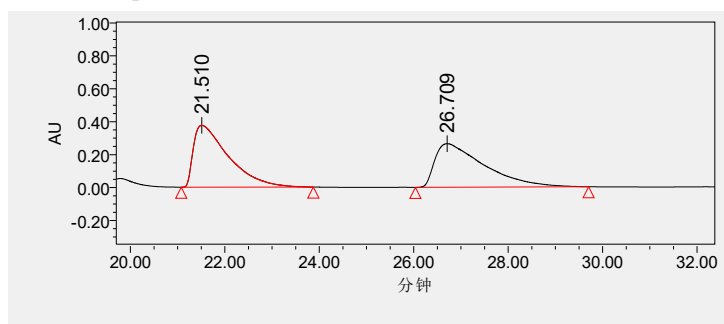

| peak | Retention time (min) | Area (μV*s) | Area (%) | Height (%) |
|------|----------------------|-------------|----------|------------|
| 1    | 21.510               | 19400768    | 50.33    | 376097     |
| 2    | 26.709               | 19149366    | 49.67    | 264550     |

Racemic *anti*-4bf

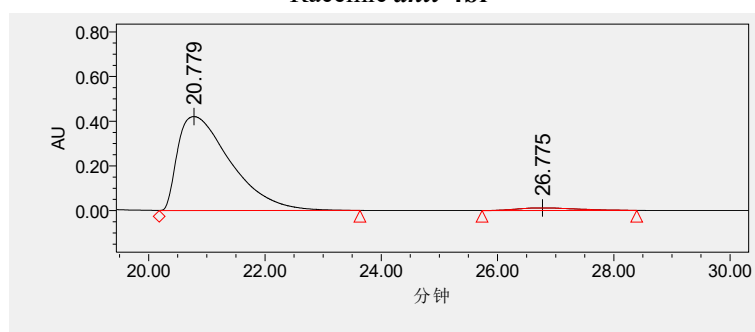

| peak | Retention time (min) | Area (μV*s) | Area (%) | Height (%) |
|------|----------------------|-------------|----------|------------|
| 1    | 20.779               | 26616256    | 97.01    | 420573     |
| 2    | 26.775               | 820568      | 2.99     | 11574      |

Enantiomerically enriched *anti*-4bf

1-(*tert*-butyl) 3'-methyl (3*S*,5'*S*)-5'-(4-bromophenyl)-2-oxodispiro[indoline-3,1'-cyclopentane-2',3''-oxetan]-3'-ene-1,3'-dicarboxylate (*anti*-4bg)

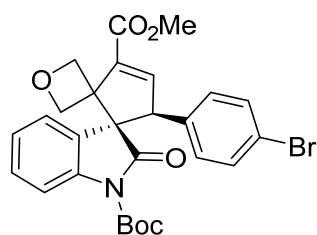

According to the general procedure to afford the mixture of two isomers (46 mg, 87% yield), and the title compound was further purified as a foam;  $[\alpha]_D^{25} = -139.855$  (c 0.138, CHCl<sub>3</sub>); <sup>1</sup>H NMR (400 MHz, CDCl<sub>3</sub>) δ 7.75 (d, J = 8.1 Hz, 1H), 7.40 – 7.26 (m, 3H), 7.22 – 7.18 (m, 2H), 6.98 (d, J = 2.1 Hz, 1H), 6.58 – 6.51 (m, 2H), 5.19 (d, J = 7.1 Hz, 1H), 5.03 (d, J = 6.6 Hz, 1H), 4.87 (d, J = 6.6 Hz, 1H), 4.29 (d, J = 7.2 Hz, 1H), 4.17 (d, J = 2.2 Hz, 1H), 3.87 (s, 3H), 1.42 (s, 9H); <sup>13</sup>C NMR (101 MHz, CDCl<sub>3</sub>): δ 173.13, 163.81, 148.37, 143.46, 140.78, 138.93, 134.58, 131.38, 129.68, 129.65, 126.39, 124.86, 124.84, 122.08, 115.28, 84.41, 78.13, 76.50, 65.69, 59.62, 56.57, 52.02, 27.90; HRMS (ESI): m/z calcd for C<sub>27</sub>H<sub>26</sub>BrNO<sub>6</sub> [M+H]<sup>+</sup> = 540.1016, found = 540.1017; HPLC: The ee value was 94%, t<sub>R</sub> (major) = 26.12 min, t<sub>R</sub> (minor) = 34.65 min (Chiralpak IE 3, λ = 254 nm, 20% *i*-PrOH/hexane, flow rate = 1.0 mL/min).

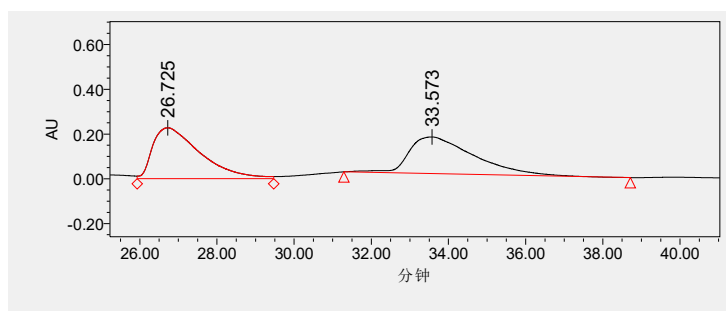

| peak | Retention time (min) | Area (μV*s) | Area (%) | Height (%) |
|------|----------------------|-------------|----------|------------|
| 1    | 26.725               | 19430113    | 50.12    | 227086     |
| 2    | 33.573               | 19340539    | 49.88    | 163653     |

Racemic *anti*-4bg

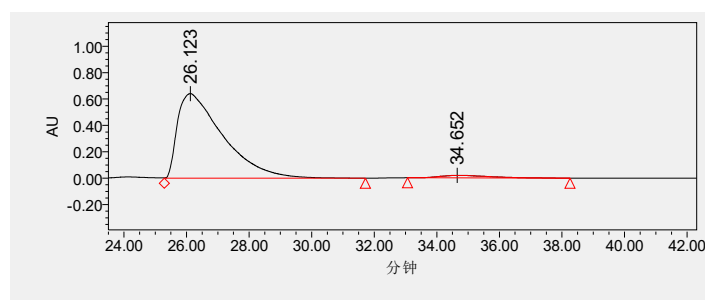

| peak | Retention time (min) | Area (μV*s) | Area (%) | Height (%) |
|------|----------------------|-------------|----------|------------|
| 1    | 26.123               | 64472458    | 96.86    | 640562     |
| 2    | 34.652               | 2089455     | 3.14     | 18725      |

Enantiomerically enriched *anti*-4bg

1-(*tert*-butyl) 3'-methyl (3*S*,5'*R*)-2-oxo-5'-(pyridin-2-yl)dispiro[indoline-3,1'-cyclopentane-2',3''-oxetan]-3'-ene-1,3'-dicarboxylate (*anti*-4bh)

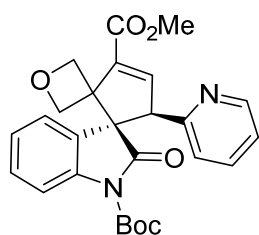

According to the general procedure to afford the mixture of two isomers (44 mg, 97% yield), and the title compound was further purified as a foam;  $[\alpha]^{25}_{\text{D}} = -11.688$  (c 0.231,  $\text{CHCl}_3$ );  $^1\text{H NMR}$  (400 MHz,  $\text{CDCl}_3$ )  $\delta$  8.32 (d,  $J = 3.9$  Hz, 1H), 7.69 (d,  $J = 8.2$  Hz, 1H), 7.41 (td,  $J = 7.7, 1.9$  Hz, 1H), 7.37 (d,  $J = 2.3$  Hz, 1H), 7.09 (td,  $J = 7.8, 1.4$  Hz, 1H), 7.00 – 6.93 (m, 1H), 6.90 (d,  $J = 7.8$  Hz, 1H), 6.77 (td,  $J = 7.6, 1.1$  Hz, 1H), 6.66 (dd,  $J = 7.7, 1.4$  Hz, 1H), 5.16 (d,  $J = 6.9$  Hz, 1H), 4.95 (dd,  $J = 17.1, 7.0$  Hz, 2H), 4.77 (d,  $J = 2.3$  Hz, 1H), 3.92 (s, 4H), 1.67 (s, 9H);  $^{13}\text{C NMR}$  (101 MHz,  $\text{CDCl}_3$ ):  $\delta$  175.30, 164.00, 156.75, 149.39, 144.58, 139.91, 137.33, 136.33, 128.80, 125.94, 124.26, 123.71, 122.26, 122.13, 114.73, 84.76, 76.13, 75.95, 63.80, 59.09, 58.78, 51.98, 28.19; **HRMS** (ESI):  $m/z$  calcd for  $\text{C}_{26}\text{H}_{27}\text{N}_2\text{O}_6$   $[\text{M}+\text{H}]^+ = 463.1864$ , found = 463.1873; **HPLC**: The ee value was 33%,  $t_{\text{R}}$  (major) = 36.18 min,  $t_{\text{R}}$  (minor) = 31.61 min (Chiralpak IA 3,  $\lambda = 254$  nm, 20% *i*-PrOH/hexane, flow rate = 1.0 mL/min).

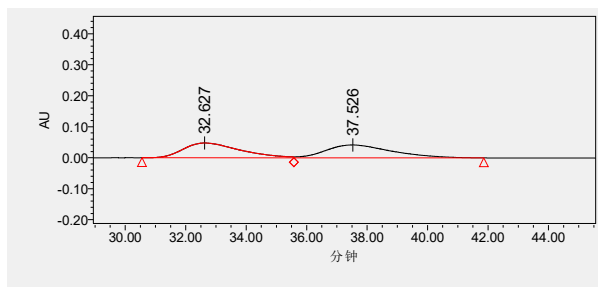

| peak | Retention time (min) | Area ( $\mu\text{V}\cdot\text{s}$ ) | Area (%) | Height (%) |
|------|----------------------|-------------------------------------|----------|------------|
| 1    | 32.627               | 6203803                             | 49.59    | 47875      |
| 2    | 37.526               | 6307586                             | 50.41    | 41713      |

Racemic *anti*-4bh

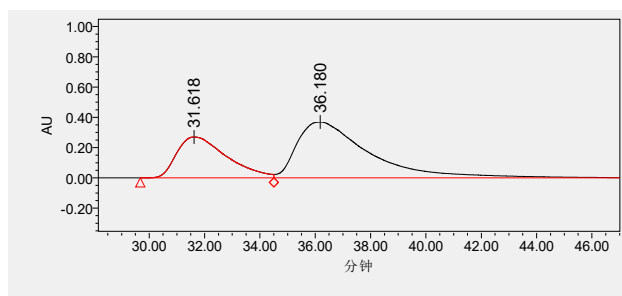

| peak | Retention time (min) | Area ( $\mu\text{V}\cdot\text{s}$ ) | Area (%) | Height (%) |
|------|----------------------|-------------------------------------|----------|------------|
| 1    | 31.618               | 33738631                            | 33.55    | 269492     |
| 2    | 36.180               | 66815027                            | 66.45    | 368669     |

Enantiomerically enriched *anti*-4bh

1-(*tert*-butyl) 3'-methyl (3*S*,5'*R*)-2-oxo-5'-(thiophen-2-yl)dispiro[indoline-3,1'-cyclopentane-2',3''-oxetan]-3'-ene-1,3'-dicarboxylate (*anti*-4*bi*)

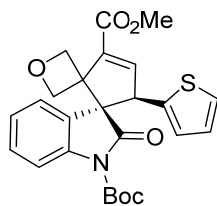

According to the general procedure to afford the mixture of two isomers (39 mg, 84% yield), and the title compound was further purified as a foam;  $[\alpha]^{25}_D = -104.706$  (c 0.170, CHCl<sub>3</sub>); <sup>1</sup>H NMR (400 MHz, CDCl<sub>3</sub>) δ 7.86 (d, *J* = 8.2 Hz, 1H), 7.42 (ddd, *J* = 8.3, 7.0, 1.8 Hz, 1H), 7.37 – 7.27 (m, 2H), 7.07 (dd, *J* = 5.7, 1.7 Hz, 2H), 6.85 (dd, *J* = 5.1, 3.5 Hz, 1H), 6.67 – 6.61 (m, 1H), 5.23 (d, *J* = 7.1 Hz, 1H), 4.96 (d, *J* = 6.6 Hz, 1H), 4.90 (d, *J* = 6.6 Hz, 1H), 4.49 (d, *J* = 2.2 Hz, 1H), 4.43 (d, *J* = 7.1 Hz, 1H), 3.92 (s, 3H), 1.48 (s, 9H); <sup>13</sup>C NMR (101 MHz, CDCl<sub>3</sub>): δ 172.97, 163.85, 148.62, 143.74, 140.98, 138.11, 137.54, 129.66, 126.99, 126.50, 126.21, 125.01, 124.81, 124.54, 115.33, 84.30, 77.86, 76.38, 65.20, 56.73, 55.14, 52.03, 28.11, 27.98; HRMS (ESI): *m/z* calcd for C<sub>25</sub>H<sub>26</sub>NO<sub>6</sub>S [M+H]<sup>+</sup> = 468.1475, found = 468.1490; HPLC: The ee value was 92%, *t<sub>R</sub>* (major) = 25.45 min, *t<sub>R</sub>* (minor) = 28.62 min (Chiralpak IE 3, λ = 254 nm, 20% *i*-PrOH/hexane, flow rate = 1.0 mL/min).

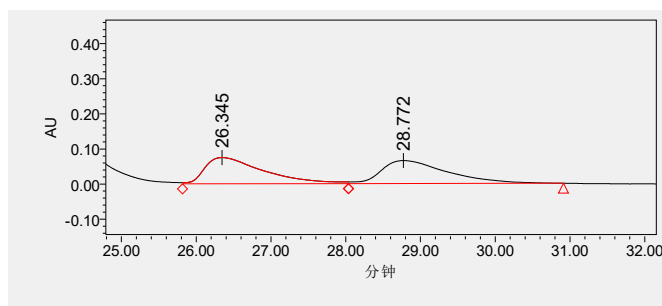

| peak | Retention time (min) | Area (μV*s) | Area (%) | Height (%) |
|------|----------------------|-------------|----------|------------|
| 1    | 26.345               | 4093434     | 50.53    | 74765      |
| 2    | 28.772               | 4006932     | 49.47    | 65237      |

Racemic *anti*-4*bi*

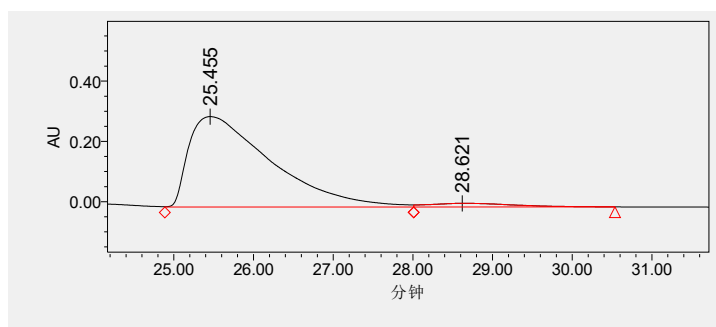

| peak | Retention time (min) | Area (μV*s) | Area (%) | Height (%) |
|------|----------------------|-------------|----------|------------|
| 1    | 25.455               | 21553223    | 96.11    | 300218     |
| 2    | 28.621               | 873009      | 3.89     | 11952      |

Enantiomerically enriched *anti*-4*bi*

1-(*tert*-butyl) 3'-methyl (3*S*,5'*R*)-5'-ethyl-2-oxodispiro[indoline-3,1'-cyclopentane-2',3''-oxetan]-3'-ene-1,3'-dicarboxylate (*anti*-4*bj*)

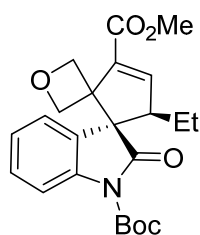

According to the general procedure to afford the mixture of two isomers (33 mg, 78% yield), and the title compound was further purified as a oil;  $[\alpha]_D^{25} = -45.000$  (c 0.120, CHCl<sub>3</sub>); <sup>1</sup>H NMR (400 MHz, CDCl<sub>3</sub>) δ 7.85 (d, *J* = 8.2 Hz, 1H), 7.33 (ddd, *J* = 8.3, 7.2, 1.7 Hz, 1H), 7.22 – 7.12 (m, 2H), 6.97 (d, *J* = 2.2 Hz, 1H), 5.10 (s, 1H), 4.79 (d, *J* = 6.6 Hz, 1H), 4.63 (d, *J* = 6.6 Hz, 1H), 4.52 (d, *J* = 7.0 Hz, 1H), 3.83 (s, 3H), 2.86 (ddd, *J* = 9.9, 5.5, 2.2 Hz, 1H), 1.60 (s, 9H), 1.52 – 1.42 (m, 1H), 1.39 – 1.29 (m, 1H), 0.79 (t, *J* = 7.4 Hz, 3H); <sup>13</sup>C NMR (101 MHz, CDCl<sub>3</sub>): δ 174.11, 164.12, 148.89, 146.63, 140.19, 135.83, 129.14, 128.13, 124.67, 124.09, 115.13, 84.67, 77.10, 76.43, 62.46, 57.42, 56.20, 51.78, 28.12, 22.59, 12.52; HRMS (ESI): *m/z* calcd for C<sub>23</sub>H<sub>28</sub>NO<sub>6</sub> [M+H]<sup>+</sup> = 414.1911, found = 414.1923; HPLC: The ee value was 91%, *t<sub>R</sub>* (major) = 42.72 min, *t<sub>R</sub>* (minor) = 56.01 min (Chiralpak IC 3, λ = 254 nm, 20% *i*-PrOH/hexane, flow rate = 1.0 mL/min).

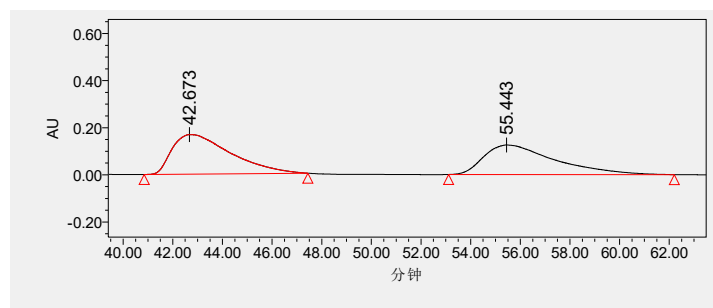

| peak | Retention time (min) | Area (μV*s) | Area (%) | Height (%) |
|------|----------------------|-------------|----------|------------|
| 1    | 42.673               | 27532951    | 52.47    | 167852     |
| 2    | 55.443               | 24942960    | 47.53    | 125359     |

Racemic *anti*-4*bj*

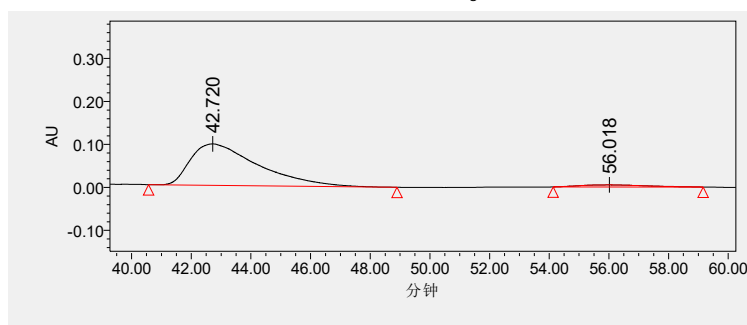

| peak | Retention time (min) | Area (μV*s) | Area (%) | Height (%) |
|------|----------------------|-------------|----------|------------|
| 1    | 42.720               | 15190025    | 95.41    | 96367      |
| 2    | 56.018               | 730154      | 4.59     | 4811       |

Enantiomerically enriched *anti*-4*bj*

1-(*tert*-butyl) 3'-methyl (3*S*,5'*S*)-5-methyl-2-oxo-5'-phenyldispiro[indoline-3,1'-cyclopentane-2',3'-oxetan]-3'-ene-1,3'-dicarboxylate (*anti*-4bk)

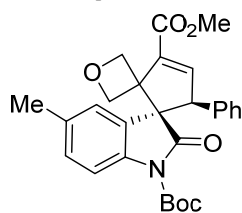

According to the general procedure to afford the mixture of two isomers (6 mg, 34% yield), and the title compound was further purified as a foam;  $[\alpha]_D^{25} = +4.412$  (c 0.136, CHCl<sub>3</sub>); <sup>1</sup>H NMR (400 MHz, CDCl<sub>3</sub>) δ 7.67 (d, *J* = 9.1 Hz, 1H), 7.23 – 7.07 (m, 6H), 6.77 – 6.70 (m, 2H), 5.25 (d, *J* = 7.1 Hz, 1H), 5.11 (d, *J* = 6.5 Hz, 1H), 4.93 (d, *J* = 6.5 Hz, 1H), 4.36 (d, *J* = 7.1 Hz, 1H), 4.26 (d, *J* = 2.2 Hz, 1H), 3.93 (s, 3H), 2.46 (s, 3H), 1.41 (s, 9H); <sup>13</sup>C NMR (101 MHz, CDCl<sub>3</sub>): δ 173.35, 163.99, 148.55, 144.41, 138.49, 138.47, 135.64, 134.36, 129.99, 128.23, 128.02, 127.82, 126.68, 125.34, 115.02, 83.86, 78.27, 76.66, 65.81, 60.22, 56.51, 51.95, 27.90, 21.41; HRMS (ESI): *m/z* calcd for C<sub>28</sub>H<sub>30</sub>NO<sub>6</sub> [M+H]<sup>+</sup> = 476.2068, found = 498.1893; HPLC: The ee value was 95%, *t<sub>R</sub>* (major) = 21.66 min, *t<sub>R</sub>* (minor) = 34.47 min (Chiralpak IE 3, λ = 254 nm, 20% *i*-PrOH/hexane, flow rate = 1.0 mL/min).

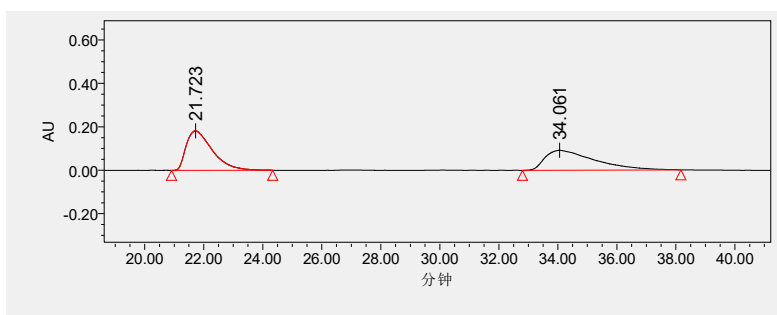

| peak | Retention time (min) | Area (μV*s) | Area (%) | Height (%) |
|------|----------------------|-------------|----------|------------|
| 1    | 21.723               | 11140983    | 51.10    | 181789     |
| 2    | 34.061               | 10660024    | 48.90    | 91572      |

Racemic *anti*-4bk

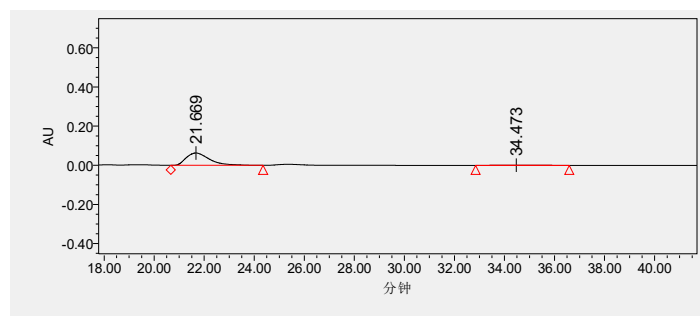

| peak | Retention time (min) | Area (μV*s) | Area (%) | Height (%) |
|------|----------------------|-------------|----------|------------|
| 1    | 21.669               | 4106977     | 97.27    | 63260      |
| 2    | 34.473               | 115180      | 2.73     | 1079       |

Enantiomerically enriched *anti*-4bk



1-(*tert*-butyl) 3'-methyl (3*S*,5*S*)-5-methoxy-2-oxo-5'-phenylspiro[indoline-3,1'-cyclopentane-2', 3''-oxetan]-3'-ene-1,3'-dicarboxylate (*anti*-4bl)

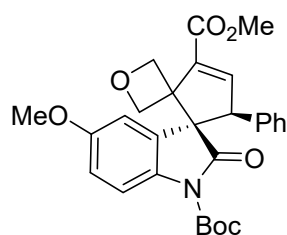

According to the general procedure to afford the mixture of two isomers (42 mg, 87% yield), and the title compound was further purified as a foam;  $[\alpha]^{25}_D = -79.719$  (c 0.498, CHCl<sub>3</sub>); <sup>1</sup>H NMR (400 MHz, CDCl<sub>3</sub>) δ 7.73 (d, *J* = 8.8 Hz, 1H), 7.21 – 7.10 (m, 3H), 7.08 (d, *J* = 2.1 Hz, 1H), 6.97 – 6.88 (m, 2H), 6.76 (dd, *J* = 8.0, 1.6 Hz, 2H), 5.25 (d, *J* = 7.1 Hz, 1H), 5.11 (d, *J* = 6.6 Hz, 1H), 4.93 (d, *J* = 6.5 Hz, 1H), 4.37 (d, *J* = 7.1 Hz, 1H), 4.25 (d, *J* = 2.2 Hz, 1H), 3.92 (s, 3H), 3.88 (s, 3H), 1.41 (s, 9H); <sup>13</sup>C NMR (101 MHz, CDCl<sub>3</sub>): δ 173.12, 163.94, 157.00, 148.60, 144.33, 138.44, 135.58, 134.22, 128.24, 128.07, 127.85, 116.10, 113.46, 111.77, 83.84, 78.21, 76.45, 65.90, 60.26, 56.70, 55.85, 51.93, 27.91; HRMS (ESI): *m/z* calcd for C<sub>28</sub>H<sub>30</sub>NO<sub>7</sub> [M+H]<sup>+</sup> = 492.2017, found = 492.2030; HPLC: The ee value was 91%, *t<sub>R</sub>* (major) = 28.58 min, *t<sub>R</sub>* (minor) = 54.08 min (Chiralpak IE 3, λ = 254 nm, 20% *i*-PrOH/hexane, flow rate = 1.0 mL/min).

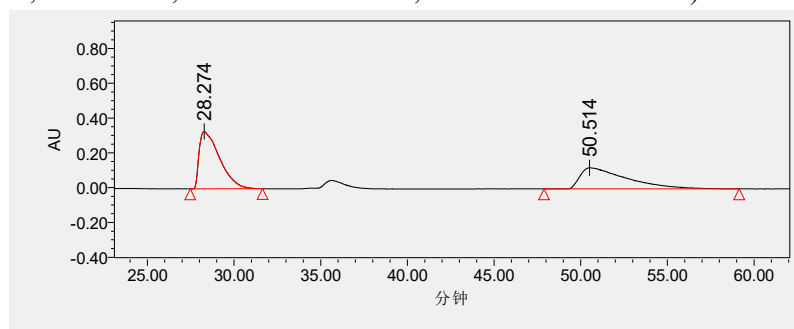

| peak | Retention time (min) | Area (μV*s) | Area (%) | Height (%) |
|------|----------------------|-------------|----------|------------|
| 1    | 28.274               | 26968942    | 54.29    | 330089     |
| 2    | 50.514               | 22710015    | 45.71    | 121345     |

Racemic *anti*-4bl

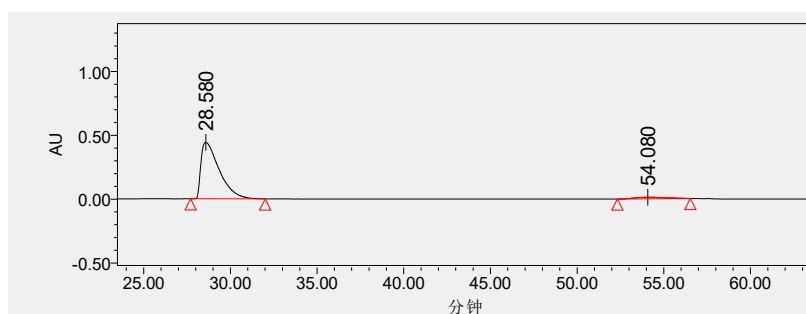

| peak | Retention time (min) | Area (μV*s) | Area (%) | Height (%) |
|------|----------------------|-------------|----------|------------|
| 1    | 28.580               | 32426828    | 95.53    | 441310     |
| 2    | 54.080               | 1515757     | 4.47     | 11922      |

Enantiomerically enriched *anti*-4bl

*1-(tert-butyl) 3'-methyl (3S,5'S)-5-bromo-2-oxo-5'-phenyldispiro[indoline-3,1'-cyclopentane-2',3''-oxetan]-3'-ene-1,3'-dicarboxylate (anti-4bm)*

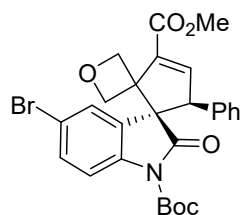

According to the general procedure to afford the mixture of two isomers (49 mg, 92% yield), and the title compound was further purified as a foam;  $[\alpha]^{25}_D = -99.432$  (c 0.176,  $\text{CHCl}_3$ );  $^1\text{H NMR}$  (400 MHz,  $\text{CDCl}_3$ )  $\delta$  7.71 (d,  $J = 9.3$  Hz, 1H), 7.53 (dq,  $J = 3.5, 2.0$  Hz, 2H), 7.21 – 7.12 (m, 3H), 7.07 (d,  $J = 2.1$  Hz, 1H), 6.75 (d,  $J = 6.5$  Hz, 2H), 5.32 – 5.23 (m, 1H), 5.03 (d,  $J = 6.7$  Hz, 1H), 4.96 (d,  $J = 6.8$  Hz, 1H), 4.34 (d,  $J = 7.2$  Hz, 1H), 4.25 (d,  $J = 2.2$  Hz, 1H), 3.93 (s, 3H), 1.41 (s, 9H);  $^{13}\text{C NMR}$  (101 MHz,  $\text{CDCl}_3$ ):  $\delta$  172.33, 163.79, 148.28, 144.06, 139.84, 138.39, 135.17, 132.44, 129.11, 128.37, 128.07, 128.03, 127.67, 117.63, 116.87, 84.50, 78.12, 76.41, 65.63, 60.36, 56.75, 52.02, 27.86; **HRMS** (ESI):  $m/z$  calcd for  $\text{C}_{27}\text{H}_{27}\text{BrNO}_6$   $[\text{M}+\text{H}]^+ = 540.1016$ , found = 540.1019; **HPLC**: The ee value was 90%,  $t_R$  (major) = 10.17 min,  $t_R$  (minor) = 14.99 min (Chiralpak IE 3,  $\lambda = 254$  nm, 30% *i*-PrOH/hexane, flow rate = 1.0 mL/min).

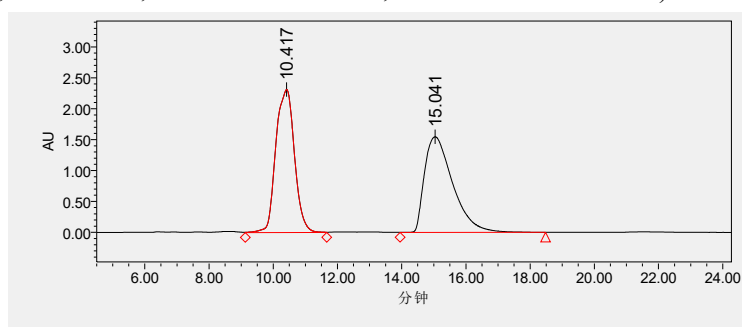

| peak | Retention time (min) | Area ( $\mu\text{V}\cdot\text{s}$ ) | Area (%) | Height (%) |
|------|----------------------|-------------------------------------|----------|------------|
| 1    | 10.417               | 93313353                            | 49.70    | 2312461    |
| 2    | 15.041               | 94445468                            | 50.30    | 1545938    |

Racemic *anti-4bm*

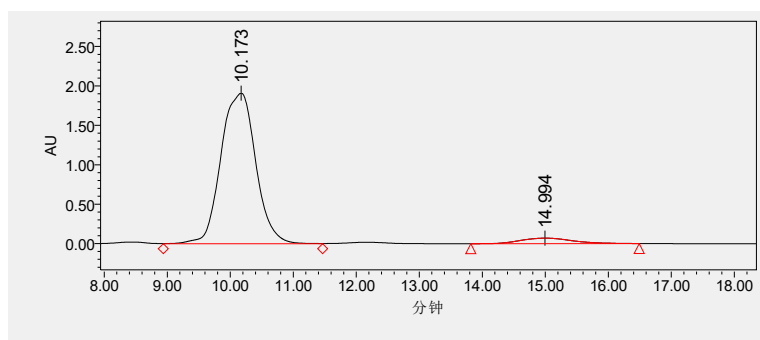

| peak | Retention time (min) | Area ( $\mu\text{V}\cdot\text{s}$ ) | Area (%) | Height (%) |
|------|----------------------|-------------------------------------|----------|------------|
| 1    | 10.173               | 73464522                            | 94.82    | 1910061    |
| 2    | 14.994               | 4017346                             | 5.18     | 70472      |

Enantiomerically enriched *anti-4bm*

1-(*tert*-butyl) 3'-methyl (3*S*,5'*S*)-5-chloro-2-oxo-5'-phenylspiro[indoline-3,1'-cyclopentane-2',3''-oxetan]-3'-ene-1,3'-dicarboxylate (*anti*-4bn)

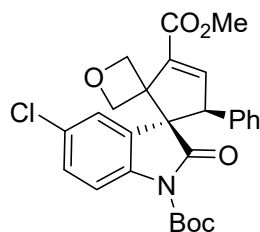

According to the general procedure to afford the mixture of two isomers (43 mg, 88% yield), and the title compound was further purified as a foam;  $[\alpha]_D^{25} = -100.476$  (c 0.210, CHCl<sub>3</sub>); <sup>1</sup>H NMR (400 MHz, CDCl<sub>3</sub>) δ 7.77 (d, *J* = 9.4 Hz, 1H), 7.38 (d, *J* = 7.1 Hz, 2H), 7.21 – 7.13 (m, 3H), 7.07 (d, *J* = 2.0 Hz, 1H), 6.78 – 6.73 (m, 2H), 5.26 (d, *J* = 7.2 Hz, 1H), 5.03 (d, *J* = 6.7 Hz, 1H), 4.96 (d, *J* = 6.7 Hz, 1H), 4.35 (d, *J* = 7.2 Hz, 1H), 4.25 (d, *J* = 2.2 Hz, 1H), 3.93 (s, 3H), 1.41 (s, 9H); <sup>13</sup>C NMR (101 MHz, CDCl<sub>3</sub>): δ 172.46, 163.80, 148.30, 144.08, 139.32, 138.38, 135.16, 130.21, 129.53, 128.37, 128.07, 128.03, 124.85, 116.49, 84.48, 78.13, 76.39, 65.68, 60.34, 56.72, 52.03, 27.86; HRMS (ESI): *m/z* calcd for C<sub>27</sub>H<sub>27</sub>ClNO<sub>6</sub> [M+H]<sup>+</sup> = 496.1521, found = 496.1525; HPLC: The ee value was 90%, *t<sub>R</sub>* (major) = 14.27 min, *t<sub>R</sub>* (minor) = 22.78 min (Chiralpak IE 3, λ = 254 nm, 20% *i*-PrOH/hexane, flow rate = 1.0 mL/min).

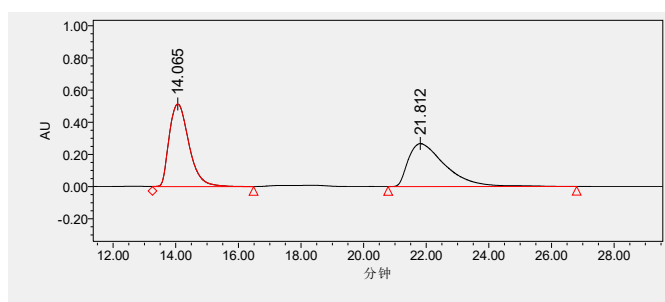

| peak | Retention time (min) | Area (μV*s) | Area (%) | Height (%) |
|------|----------------------|-------------|----------|------------|
| 1    | 14.065               | 22453122    | 50.55    | 513671     |
| 2    | 21.812               | 21967964    | 49.45    | 267189     |

Racemic *anti*-4bn

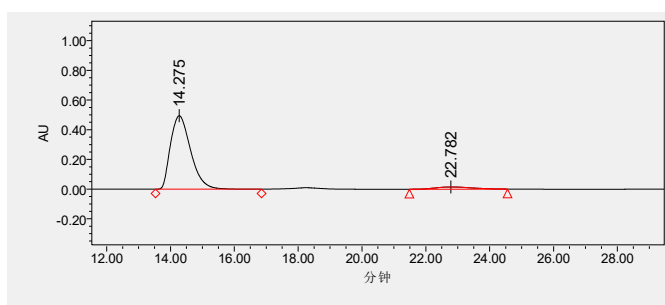

| peak | Retention time (min) | Area (μV*s) | Area (%) | Height (%) |
|------|----------------------|-------------|----------|------------|
| 1    | 14.275               | 21700523    | 94.96    | 495217     |
| 2    | 22.782               | 1152773     | 5.04     | 14804      |

Enantiomerically enriched *anti*-4bn

1-(*tert*-butyl) 3'-methyl (3*S*,5'*S*)-6-chloro-2-oxo-5'-phenylspiro[indoline-3,1'-cyclopentane-2',3''-oxetan]-3'-ene-1,3'-dicarboxylate (*anti*-4*bo*)

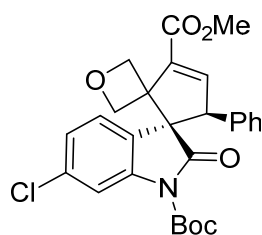

According to the general procedure to afford the mixture of two isomers (33 mg, 68% yield), and the title compound was further purified as a foam;  $[\alpha]^{25}_D = -75.000$  (c 0.164, CHCl<sub>3</sub>); <sup>1</sup>H NMR (400 MHz, CDCl<sub>3</sub>) δ 7.88 (d, *J* = 1.7 Hz, 1H), 7.38 – 7.28 (m, 2H), 7.20 – 7.10 (m, 3H), 7.06 (d, *J* = 2.2 Hz, 1H), 6.78 – 6.70 (m, 2H), 5.25 (d, *J* = 7.2 Hz, 1H), 5.00 (d, *J* = 6.6 Hz, 1H), 4.93 (d, *J* = 6.6 Hz, 1H), 4.31 (d, *J* = 7.2 Hz, 1H), 4.24 (d, *J* = 2.2 Hz, 1H), 3.91 (s, 3H), 1.41 (s, 9H); <sup>13</sup>C NMR (101 MHz, CDCl<sub>3</sub>): δ 172.75, 163.83, 148.22, 144.16, 141.71, 138.35, 135.33, 135.24, 130.28, 128.38, 128.03, 127.99, 125.68, 125.19, 124.83, 115.93, 84.61, 78.07, 76.41, 65.58, 60.16, 56.70, 51.98, 27.84; HRMS (ESI): *m/z* calcd for C<sub>27</sub>H<sub>27</sub>ClNO<sub>6</sub> [M+H]<sup>+</sup> = 496.1521, found = 496.1523; HPLC: The ee value was 88%, *t<sub>R</sub>* (major) = 15.17 min, *t<sub>R</sub>* (minor) = 19.28 min (Chiralpak IE 3, λ = 254 nm, 20% *i*-PrOH/hexane, flow rate = 1.0 mL/min).

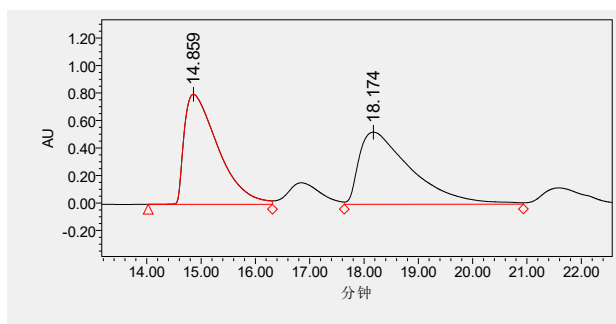

| peak | Retention time (min) | Area (μV*s) | Area (%) | Height (%) |
|------|----------------------|-------------|----------|------------|
| 1    | 14.859               | 34731871    | 49.80    | 801233     |
| 2    | 18.174               | 35015383    | 50.20    | 524273     |

Racemic *anti*-4*bo*

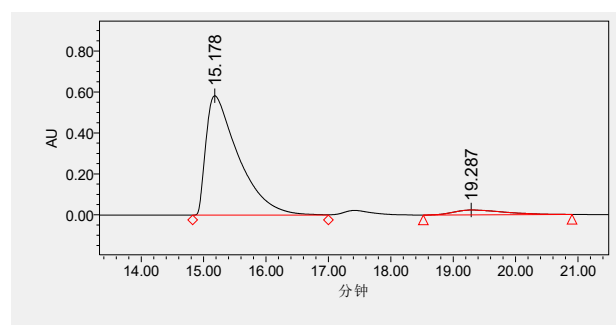

| peak | Retention time (min) | Area (μV*s) | Area (%) | Height (%) |
|------|----------------------|-------------|----------|------------|
| 1    | 15.178               | 21113356    | 94.07    | 582903     |
| 2    | 19.287               | 1330535     | 5.93     | 23473      |

Enantiomerically enriched *anti*-4*bo*

1-(*tert*-butyl) 3'-methyl (3*R*,5'*S*)-4-chloro-2-oxo-5'-phenyldispiro[indoline-3,1'-cyclopentane-2',3'-oxetan]-3'-ene-1,3'-dicarboxylate (*anti*-4bp)

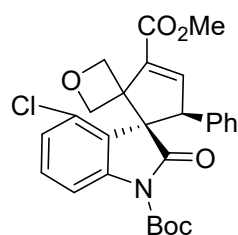

According to the general procedure to afford the mixture of two isomers (38 mg, 78% yield), and the title compound was further purified as a foam;  $[\alpha]_D^{25} = -77.143$  (c 0.140,  $\text{CHCl}_3$ );  $^1\text{H NMR}$  (400 MHz,  $\text{CDCl}_3$ )  $\delta$  7.80 (dd,  $J = 8.2, 1.0$  Hz, 1H), 7.37 (t,  $J = 8.2$  Hz, 1H), 7.29 (dd,  $J = 8.3, 1.0$  Hz, 1H), 7.18 – 7.06 (m, 4H), 6.75 (dd,  $J = 7.8, 1.8$  Hz, 2H), 5.10 (d,  $J = 2.3$  Hz, 1H), 5.04 (d,  $J = 7.4$  Hz, 1H), 4.97 (d,  $J = 7.0$  Hz, 1H), 4.90 (d,  $J = 7.0$  Hz, 1H), 4.45 (d,  $J = 7.4$  Hz, 1H), 3.91 (s, 3H), 1.37 (s, 9H);  $^{13}\text{C NMR}$  (101 MHz,  $\text{CDCl}_3$ ):  $\delta$  172.11, 163.81, 148.25, 144.42, 142.56, 138.80, 136.34, 131.23, 130.74, 128.29, 128.22, 127.71, 126.12, 124.66, 113.92, 84.54, 79.19, 77.73, 66.35, 58.27, 55.14, 51.93, 27.79; **HRMS** (ESI):  $m/z$  calcd for  $\text{C}_{27}\text{H}_{27}\text{ClNO}_6$   $[\text{M}+\text{H}]^+ = 496.1521$ , found = 496.1525; **HPLC**: The ee value was 63%,  $t_R$  (major) = 17.80 min,  $t_R$  (minor) = 23.11 min (Chiralpak IE 3,  $\lambda = 254$  nm, 20% *i*-PrOH/hexane, flow rate = 1.0 mL/min).

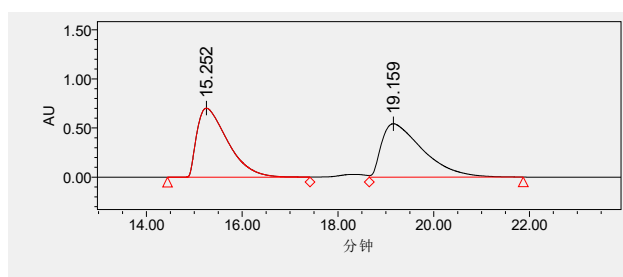

| peak | Retention time (min) | Area ( $\mu\text{V}\cdot\text{s}$ ) | Area (%) | Height (%) |
|------|----------------------|-------------------------------------|----------|------------|
| 1    | 15.252               | 31399889                            | 49.18    | 702972     |
| 2    | 19.159               | 32450860                            | 50.82    | 543317     |

Racemic *anti*-4bp

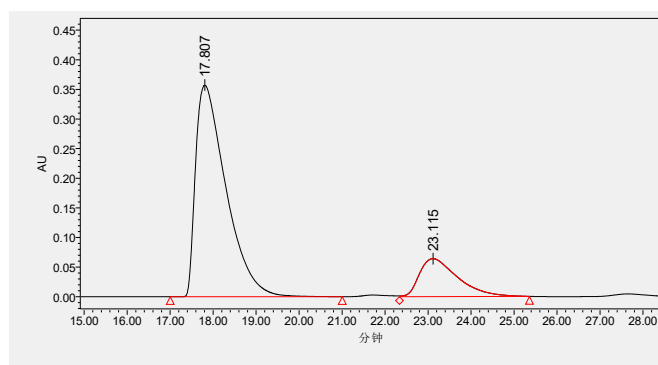

| peak | Retention time (min) | Area ( $\mu\text{V}\cdot\text{s}$ ) | Area (%) | Height (%) |
|------|----------------------|-------------------------------------|----------|------------|
| 1    | 17.807               | 17554952                            | 81.68    | 357316     |
| 2    | 23.115               | 3938228                             | 18.32    | 63929      |

Enantiomerically enriched *anti*-4bp

1-(*tert*-butyl) 3'-methyl (3*S*,5'*S*)-5-nitro-2-oxo-5'-phenyldispiro[indoline-3,1'-cyclopentane-2',3''-oxetan]-3'-ene-1,3'-dicarboxylate (***anti*-4bq**)

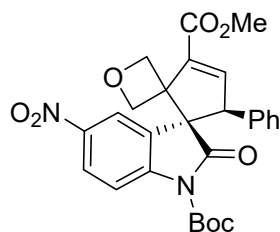

According to the general procedure to afford the mixture of two isomers (43 mg, 86% yield), and the title compound was further purified as a foam;  $[\alpha]_D^{25} = -104.730$  (c 0.148, CHCl<sub>3</sub>); <sup>1</sup>H NMR (400 MHz, CDCl<sub>3</sub>) δ 8.35 (d, *J* = 7.5 Hz, 2H), 7.99 (d, *J* = 9.7 Hz, 1H), 7.25 – 7.12 (m, 3H), 7.09 (d, *J* = 2.1 Hz, 1H), 6.74 (d, *J* = 7.6 Hz, 2H), 5.35 – 5.27 (m, 1H), 5.07 – 4.98 (m, 2H), 4.36 – 4.27 (m, 2H), 3.95 (s, 3H), 1.43 (s, 9H); <sup>13</sup>C NMR (101 MHz, CDCl<sub>3</sub>): δ 172.25, 163.64, 147.93, 146.03, 144.72, 143.83, 138.22, 134.74, 128.53, 128.34, 127.98, 125.84, 120.27, 115.33, 85.48, 78.03, 76.28, 65.59, 60.41, 57.03, 52.13, 27.81; HRMS (ESI): *m/z* calcd for C<sub>27</sub>H<sub>27</sub>N<sub>2</sub>O<sub>8</sub> [M+H]<sup>+</sup> = 507.1762, found = 507.1769; HPLC: The ee value was 92%, *t*<sub>R</sub> (major) = 14.60 min, *t*<sub>R</sub> (minor) = 30.61 min (Chiralpak IE 3, λ = 254 nm, 20% *i*-PrOH/hexane, flow rate = 1.0 mL/min).

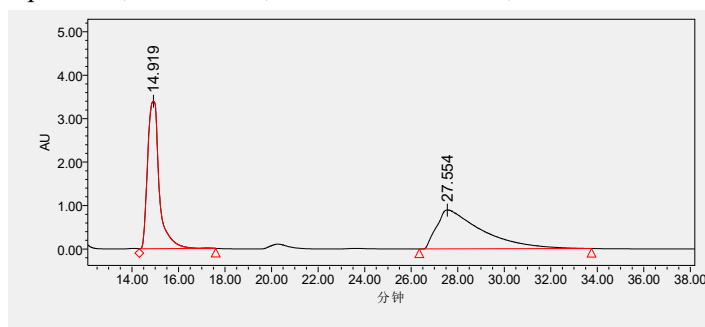

| peak | Retention time (min) | Area (μV*s) | Area (%) | Height (%) |
|------|----------------------|-------------|----------|------------|
| 1    | 14.919               | 118208689   | 49.50    | 3395133    |
| 2    | 27.554               | 120612360   | 50.50    | 894351     |

Racemic ***anti*-4bq**

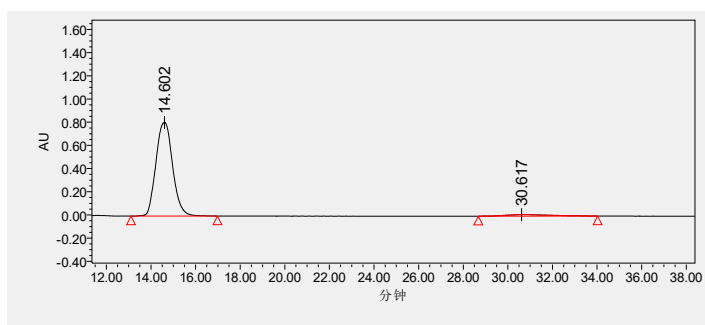

| peak | Retention time (min) | Area (μV*s) | Area (%) | Height (%) |
|------|----------------------|-------------|----------|------------|
| 1    | 14.602               | 41972610    | 96.06    | 807096     |
| 2    | 30.617               | 1722519     | 3.94     | 12450      |

Enantiomerically enriched ***anti*-4bq**

1-(*tert*-butyl) 3',6-dimethyl (3*S*,5*S*)-2-oxo-5'-phenyldispiro[indoline-3,1'-cyclopentane-2',3''-oxetan]-3'-ene-1,3',6-tricarboxylate (*anti*-4br)

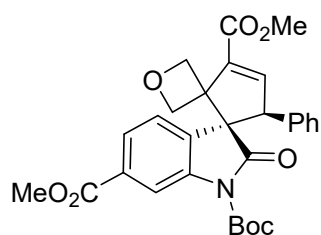

According to the general procedure to afford the mixture of two isomers (45 mg, 87% yield), and the title compound was further purified as a foam;  $[\alpha]_D^{25} = -76.389$  (c 0.144,  $\text{CHCl}_3$ );  $^1\text{H NMR}$  (400 MHz,  $\text{CDCl}_3$ )  $\delta$  8.45 (d,  $J = 1.5$  Hz, 1H), 8.06 (dd,  $J = 7.9, 1.5$  Hz, 1H), 7.50 (d,  $J = 7.9$  Hz, 1H), 7.15 (ddd,  $J = 14.5, 7.9, 6.3$  Hz, 3H), 7.08 (d,  $J = 2.2$  Hz, 1H), 6.76 – 6.68 (m, 2H), 5.27 (d,  $J = 7.2$  Hz, 1H), 5.02 (d,  $J = 6.7$  Hz, 1H), 4.95 (d,  $J = 6.7$  Hz, 1H), 4.35 (d,  $J = 7.2$  Hz, 1H), 4.29 (d,  $J = 2.2$  Hz, 1H), 3.95 (s, 3H), 3.93 (s, 3H), 1.44 (s, 9H);  $^{13}\text{C NMR}$  (101 MHz,  $\text{CDCl}_3$ ):  $\delta$  172.69, 166.43, 163.82, 148.12, 144.17, 141.01, 138.36, 135.13, 131.90, 131.42, 128.41, 128.08, 127.98, 126.22, 124.72, 116.17, 84.61, 78.17, 76.40, 65.85, 60.33, 56.88, 52.51, 52.03, 27.87; **HRMS** (ESI):  $m/z$  calcd for  $\text{C}_{29}\text{H}_{30}\text{NO}_8$   $[\text{M}+\text{H}]^+ = 520.1966$ , found = 520.1970; **HPLC**: The ee value was 91%,  $t_R$  (major) = 35.42 min,  $t_R$  (minor) = 44.30 min (Chiralpak IE 3,  $\lambda = 254$  nm, 40% *i*-PrOH/hexane, flow rate = 1.0 mL/min).

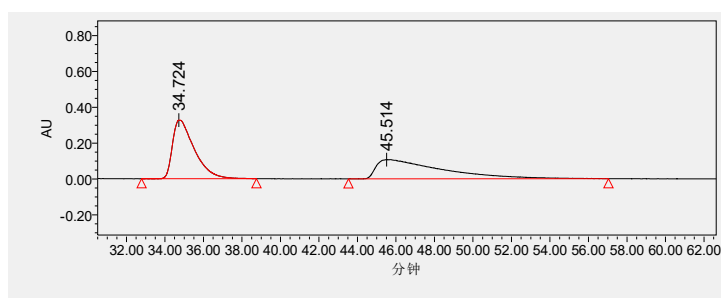

| peak | Retention time (min) | Area ( $\mu\text{V}\cdot\text{s}$ ) | Area (%) | Height (%) |
|------|----------------------|-------------------------------------|----------|------------|
| 1    | 34.724               | 25751957                            | 50.58    | 327092     |
| 2    | 45.514               | 25156706                            | 49.42    | 106957     |

Racemic *anti*-4br

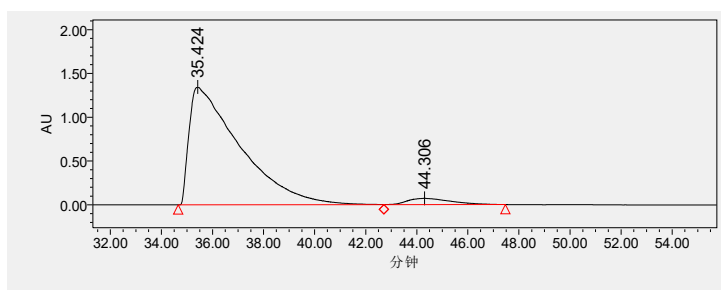

| peak | Retention time (min) | Area ( $\mu\text{V}\cdot\text{s}$ ) | Area (%) | Height (%) |
|------|----------------------|-------------------------------------|----------|------------|
| 1    | 35.424               | 185718908                           | 95.63    | 1345763    |
| 2    | 44.306               | 8482460                             | 4.37     | 71819      |

Enantiomerically enriched *anti*-4br

## H. Gram scale synthesis of *syn-6aa* and its transformation

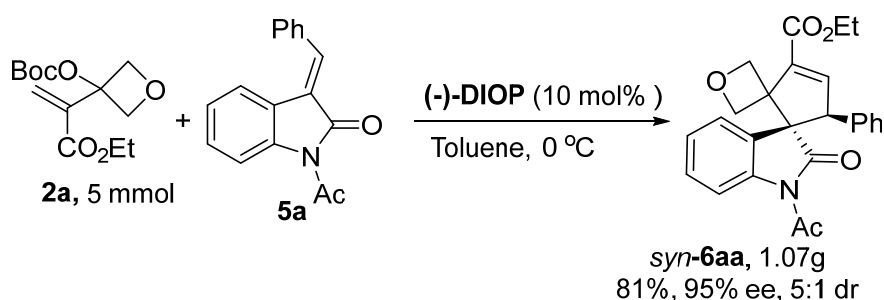

To the solution of **2a** (5.0 mmol, 1.30 g, 1.0 equiv.) and **5a** (1.28 g, 5.60 mmol, 1.5 equiv.) in anhydrous toluene (20 mL) at 0 °C was added (-)-DIOP (250 mg, 0.5 mmol, 0.1 equiv.), and the resulting mixture was stirred overnight. When MBH carbonate **2a** was consumed monitored by TLC, the reaction mixture was purified directly by flash column chromatography (hexane/ ethyl acetate = 8/1) to afford a mixture of two isomers 1.07 g, 81% yield. The <sup>1</sup>HNMR show that the dr value was 5:1. Further purification was carried out via flash column chromatography to get pure *syn-6aa*, and the ee value was 95%.

## Epoxidation

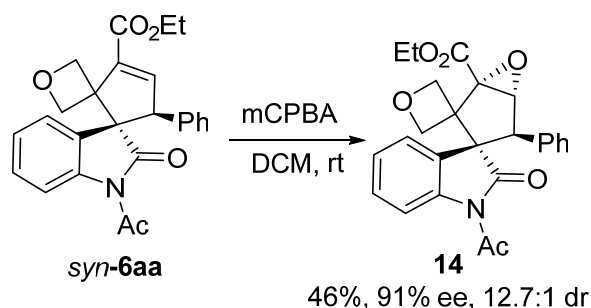

To the solution of *syn-6aa* (83.4 mg, 0.20 mmol, 1.0 equiv.) in DCM (2.0 mL) was added *m*CPBA (0.40 mmol, 2.0 equiv.) at 0 °C. The reaction mixture was stirred at room temperature for 6 h and then concentrated under vacuum to remove the solvent. The residue was purified by silica gel column chromatography (petroleum ether: ethyl acetate = 5:1) to give **14** as a pale yellow solid (79.7 mg, 46% yield, 91% ee, 12.7:1 dr). M.p. 110.7 – 116.9 °C;  $[\alpha]_{\text{D}}^{25} = +23.377$  (c 0.20, CHCl<sub>3</sub>); <sup>1</sup>H NMR (400 MHz, CDCl<sub>3</sub>) δ 8.17 (d, *J* = 7.8 Hz, 1H), 8.06 (t, *J* = 9.5 Hz, 1H), 7.41 (dd, *J* = 12.6, 7.4 Hz, 3H), 7.23 – 7.07 (m, 5H), 6.73 (d, *J* = 7.2 Hz, 2H), 6.58 (d, *J* = 6.5 Hz, 1H), 5.28 (d, *J* = 6.8 Hz, 1H), 5.24 (d, *J* = 7.0 Hz, 1H), 5.12 (d, *J* = 6.8 Hz, 1H), 5.04 (d, *J* = 6.6 Hz, 1H), 5.01 (s, 1H), 4.96 (d, *J* = 6.6 Hz, 1H), 4.48 – 4.38 (m, 2H), 4.35 (d, *J* = 7.0 Hz, 1H), 4.32 (s, 1H), 2.57 (s, 1H), 2.17 (s, 3H), 1.43 (t, *J* = 7.1 Hz, 3H); <sup>13</sup>C NMR (101 MHz, CDCl<sub>3</sub>) δ 175.9, 170.1, 163.3, 143.7, 140.8, 138.7, 135.4, 129.8, 129.5, 128.7, 128.3, 128.1, 127.8, 127.2, 125.3, 124.4, 116.5,



77.8, 76.4, 65.5, 61.0, 60.3, 56.7, 26.1, 14.2; **HRMS** (ESI):  $m/z$  calcd for  $C_{25}H_{24}NO_6$   $[M+H]^+$  = 434.1598, found = 434.1606; **HPLC**: The ee value was 91%,  $t_R$  (minor) = 12.40 min,  $t_R$  (major) = 13.64 min (Chiralpak IA 3,  $\lambda$  = 254 nm, 10% *i*-PrOH/hexane, flow rate = 1.0 mL/min).

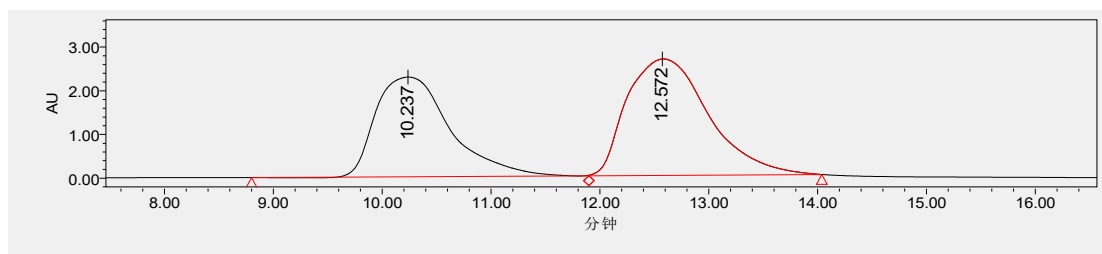

| peak | Retention time (min) | Area ( $\mu V*s$ ) | Area (%) | Height  |
|------|----------------------|--------------------|----------|---------|
| 1    | 10.237               | 108900158          | 43.92    | 2280452 |
| 2    | 12.572               | 139028131          | 56.08    | 2664111 |

Racemic **14**

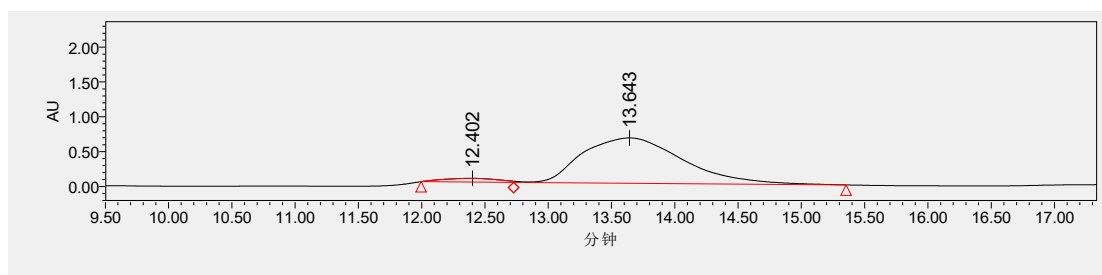

| peak | Retention time (min) | Area ( $\mu V*s$ ) | Area (%) | Height |
|------|----------------------|--------------------|----------|--------|
| 1    | 12.402               | 1604383            | 4.25     | 53147  |
| 2    | 13.643               | 36117986           | 95.75    | 650526 |

Enantiomerically enriched **14**

## Hydrogenation

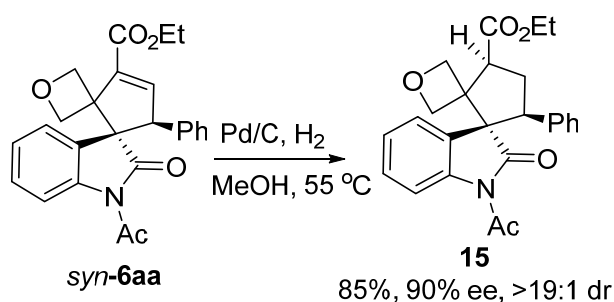

To the solution of **syn-6aa** (83.4 mg, 0.20 mmol, 1.0 equiv.) in MeOH (2.0 mL) was added 10% Pd/C (10 mg), and the mixture was stirred at 55 °C under a hydrogen atmosphere using balloon for 24 h. The reaction mixture was filtered through a short pad of Celite and the filtrate was concentrated under vacuum to give **15** (35.6 mg, 85% yield) as a white solid; M.p. 126.0 – 129.4 °C;  $[\alpha]_D^{25} = -14.286$  (c 0.23, CHCl<sub>3</sub>); <sup>1</sup>H NMR (400 MHz, CDCl<sub>3</sub>)  $\delta$  dr value >19:1; 8.15 – 8.10 (m, 1H), 8.02 (d,  $J = 8.0$  Hz, 1H), 7.17 (dd,  $J = 12.8, 7.1$  Hz, 2H), 7.10 – 6.98 (m, 4H), 6.83 (d,  $J =$

5.2 Hz, 2H), 5.02 (d,  $J = 6.6$  Hz, 1H), 5.02 (d,  $J = 6.6$  Hz, 1H), 4.72 (d,  $J = 6.5$  Hz, 1H), 4.72 (d,  $J = 6.5$  Hz, 1H), 4.36 (d,  $J = 7.1$  Hz, 3H), 4.02 (d,  $J = 7.2$  Hz, 1H), 3.69 (dd,  $J = 13.5, 4.6$  Hz, 1H), 3.51 (dd,  $J = 10.7, 7.4$  Hz, 1H), 2.86 (q,  $J = 12.8$  Hz, 1H), 2.69 (s, 3H), 2.36 (dd,  $J = 12.5, 5.8$  Hz, 1H), 1.40 (dd,  $J = 10.0, 4.1$  Hz, 3H);  $^{13}\text{C}$  NMR (101 MHz,  $\text{CDCl}_3$ )  $\delta$  178.8, 172.9, 170.3, 139.5, 136.1, 128.5, 127.9, 127.4, 126.8, 125.0, 124.7, 116.2, 79.9, 64.0, 61.4, 55.2, 52.9, 32.5, 26.8, 14.2; **HRMS** (ESI):  $m/z$  calcd for  $\text{C}_{25}\text{H}_{25}\text{NO}_5$   $[\text{M}+\text{H}]^+$  = 420.1805, found = 420.1807; The ee value was 90%,  $t_{\text{R}}$  (minor) = 10.60 min,  $t_{\text{R}}$  (major) = 17.67 min (Chiralpak IA 3,  $\lambda = 254$  nm, 10% *i*-PrOH/hexane, flow rate = 1.0 mL/min).

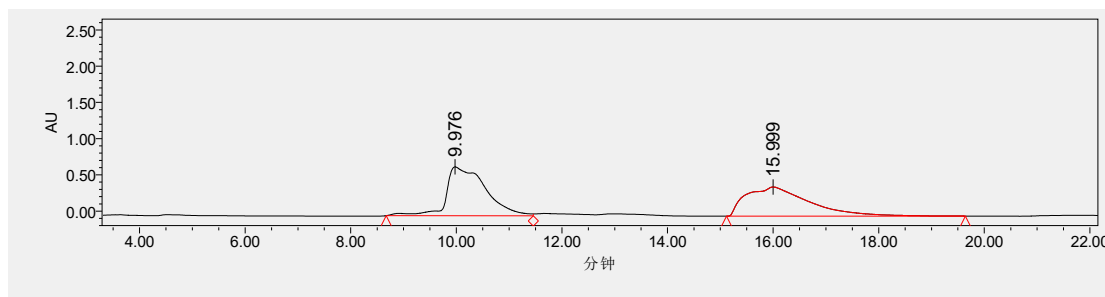

| peak | Retention time (min) | Area ( $\mu\text{V}\cdot\text{s}$ ) | Area (%) | Height |
|------|----------------------|-------------------------------------|----------|--------|
| 1    | 9.976                | 35200350                            | 51.32    | 674747 |
| 2    | 15.999               | 33388565                            | 48.68    | 402869 |

Racemic **15**

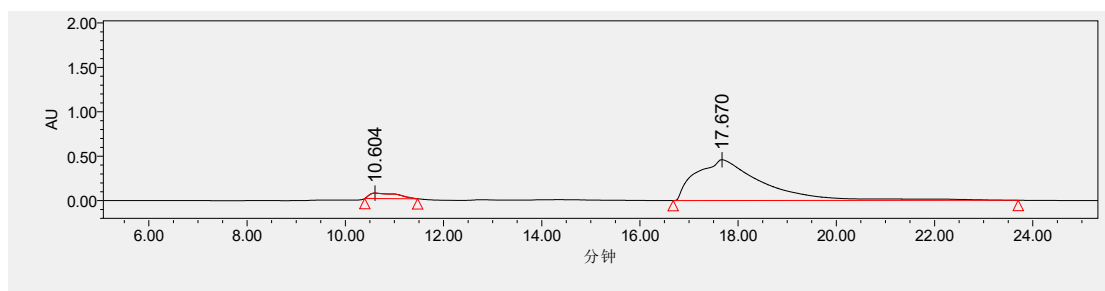

| peak | Retention time (min) | Area ( $\mu\text{V}\cdot\text{s}$ ) | Area (%) | Height (%) |
|------|----------------------|-------------------------------------|----------|------------|
| 1    | 10.604               | 2458864                             | 5.31     | 60744      |
| 2    | 17.670               | 43846303                            | 94.69    | 459714     |

Enantiomerically enriched **15**

I. X-Ray crystallographic analysis of *syn-4aa*, *syn-6ar* and *anti-4aa*

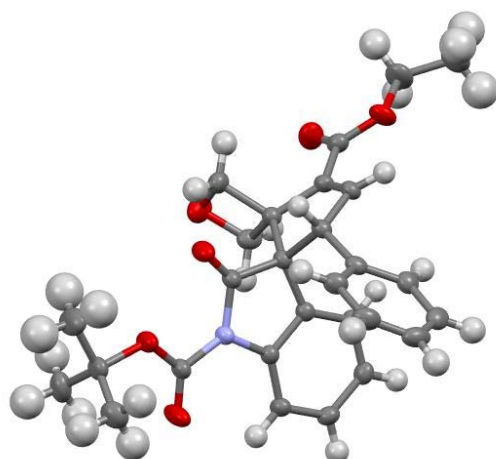

Figure S1. X-ray structure of *syn-4aa* displacement ellipsoid are drawn at 50% probability level. The title compound was recrystallized from hexane/DCM, by slow evaporation of solvent.

Table S2. Crystal data and structure refinement for *syn-4aa* (CCDC 2361587)

|                                   |                                                                                                   |
|-----------------------------------|---------------------------------------------------------------------------------------------------|
| Empirical formula                 | C <sub>28</sub> H <sub>29</sub> N O <sub>6</sub>                                                  |
| Formula weight                    | 475.52                                                                                            |
| Temperature                       | 170K                                                                                              |
| Wavelength                        | 1.54178 Å                                                                                         |
| Crystal system                    | monoclinic                                                                                        |
| Space group                       | P 21                                                                                              |
| Unit cell dimensions              | a = 8.9244 (3) Å    α = 90<br>b = 10.4924 (3) Å    β = 90.9920(10)<br>c = 13.3388 (4) Å    γ = 90 |
| Volume                            | 1248.84(7) Å <sup>3</sup>                                                                         |
| Z                                 | 2                                                                                                 |
| Density (calculated)              | 1.265 Mg/m <sup>3</sup>                                                                           |
| Absorption coefficient            | 0.726                                                                                             |
| F(000)                            | 504                                                                                               |
| Crystal size                      | 0.45*0.36*0.3 mm <sup>3</sup>                                                                     |
| Theta range for data collection   | 3.31 to 68.32°                                                                                    |
| Index ranges                      | -10 ≤ h ≤ 10, -11 ≤ k ≤ 12, -16 ≤ l ≤ 16                                                          |
| Reflections collected             | 19964                                                                                             |
| Independent reflections           | 4516 [R(int) = 0.0245]                                                                            |
| Completeness to theta = 24.999°   | 100.0 %                                                                                           |
| Refinement method                 | Full-matrix least-squares on F <sup>2</sup>                                                       |
| Data / restraints / parameters    | 4516/ 1/ 320                                                                                      |
| Goodness-of-fit on F <sup>2</sup> | 0.924                                                                                             |
| Final R indices [I > 2σ(I)]       | R1 = 0.028, wR2 = 0.0949                                                                          |
| R indices (all data)              | R1 = 0.0279, wR2 = 0.0947                                                                         |
| Largest diff. peak and hole       | 0.133 and -0.159 e.Å <sup>-3</sup>                                                                |

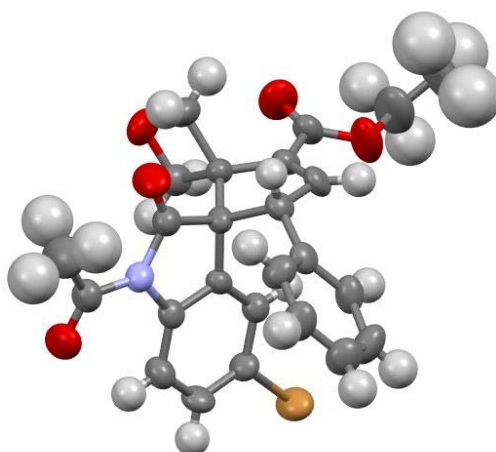

Figure S2. X-ray structure of **syn-6ar** displacement ellipsoid are drawn at 50% probability level. The title compound was recrystallized from hexane/DCM, by slow evaporation of solvent.

Table S3. Crystal data and structure refinement for **syn-6ar** (CCDC 2361585)

|                                   |                                                                                             |
|-----------------------------------|---------------------------------------------------------------------------------------------|
| Empirical formula                 | C <sub>25</sub> H <sub>22</sub> Br N O <sub>5</sub>                                         |
| Formula weight                    | 496.34                                                                                      |
| Temperature                       | 296(2)K                                                                                     |
| Wavelength                        | 0.71073 Å                                                                                   |
| Crystal system                    | monoclinic                                                                                  |
| Space group                       | P 1 21 1                                                                                    |
| Unit cell dimensions              | a = 8.958(4) Å      α = 90<br>b = 13.864(6) Å    β = 92.036(8)<br>c = 9.026(4) Å     γ = 90 |
| Volume                            | 1120.3(9) Å <sup>3</sup>                                                                    |
| Z                                 | 2                                                                                           |
| Density (calculated)              | 1.471 Mg/m <sup>3</sup>                                                                     |
| Absorption coefficient            | 0.827                                                                                       |
| F(000)                            | 508                                                                                         |
| Crystal size                      | 0.18*0.16*0.14 mm <sup>3</sup>                                                              |
| Theta range for data collection   | 2.28 to 22.36°                                                                              |
| Index ranges                      | -10 ≤ h ≤ 10, -14 ≤ k ≤ 16, -10 ≤ l ≤ 6                                                     |
| Reflections collected             | 4355                                                                                        |
| Independent reflections           | 3275 [R(int) = 0.0435]                                                                      |
| Completeness to theta = 24.999°   | 100.0 %                                                                                     |
| Refinement method                 | Full-matrix least-squares on F <sup>2</sup>                                                 |
| Data / restraints / parameters    | 3275/ 1/ 291                                                                                |
| Goodness-of-fit on F <sup>2</sup> | 0.926                                                                                       |
| Final R indices [I > 2σ(I)]       | R1 = 0.0553, wR2 = 0.0872                                                                   |
| R indices (all data)              | R1 = 0.0383, wR2 = 0.0826                                                                   |
| Largest diff. peak and hole       | 0.252 and -0.282 e.Å <sup>-3</sup>                                                          |

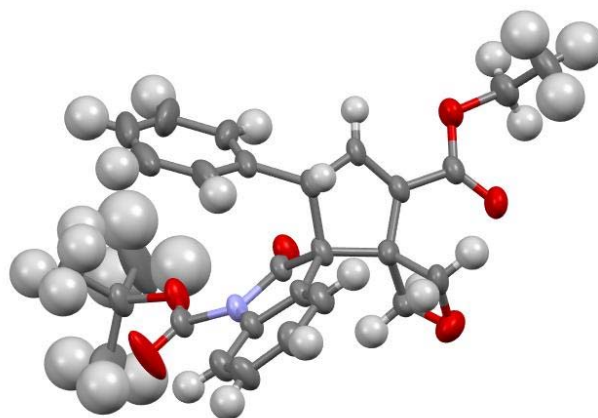

Figure S3. X-ray structure of *anti-4aa* displacement ellipsoid are drawn at 50% probability level. The title compound was recrystallized from hexane/DCM, by slow evaporation of solvent.

Table S4. Crystal data and structure refinement for *anti-4aa* (CCDC 2361586)

|                                   |                                                                                     |
|-----------------------------------|-------------------------------------------------------------------------------------|
| Empirical formula                 | C <sub>28</sub> H <sub>30</sub> N O <sub>6</sub>                                    |
| Formula weight                    | 476.53                                                                              |
| Temperature                       | 170K                                                                                |
| Wavelength                        | 1.54178 Å                                                                           |
| Crystal system                    | orthorhombic                                                                        |
| Space group                       | P 21                                                                                |
| Unit cell dimensions              | a = 7.8531(5) Å    α = 90<br>b = 8.9782(6) Å    β = 90<br>c = 35.617(2) Å    γ = 90 |
| Volume                            | 2511.2(3) Å <sup>3</sup>                                                            |
| Z                                 | 4                                                                                   |
| Density (calculated)              | 1.260 Mg/m <sup>3</sup>                                                             |
| Absorption coefficient            | 0.722                                                                               |
| F(000)                            | 1012                                                                                |
| Crystal size                      | 0.16*0.15*0.13 mm <sup>3</sup>                                                      |
| Theta range for data collection   | 2.48 to 69.46°                                                                      |
| Index ranges                      | -9<=h<=7, -10<=k<=10, -43<=l<=43                                                    |
| Reflections collected             | 27527                                                                               |
| Independent reflections           | 4661 [R(int) = 0.0825]                                                              |
| Completeness to theta = 24.999°   | 100.0 %                                                                             |
| Refinement method                 | Full-matrix least-squares on F <sup>2</sup>                                         |
| Data / restraints / parameters    | 4661/ 0/ 319                                                                        |
| Goodness-of-fit on F <sup>2</sup> | 1.188                                                                               |
| Final R indices [I>2sigma(I)]     | R1 = 0.0883, wR2 = 0.2937                                                           |
| R indices (all data)              | R1 = 0.0852, wR2 = 0.2854                                                           |
| Largest diff. peak and hole       | 0.320 and -0.360 e.Å <sup>-3</sup>                                                  |

## J. Transition state for the reaction

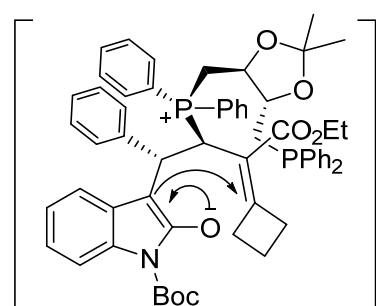

Re-face favored TS for **(-)-DIOP**

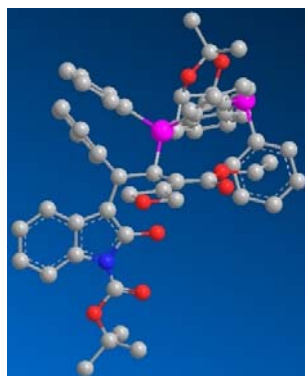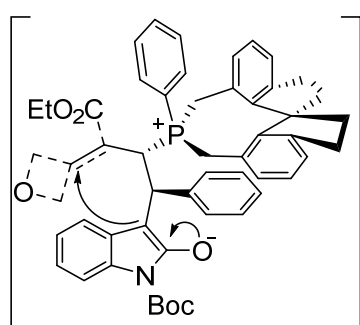

Si-face favored TS for **(R)-SITCP**

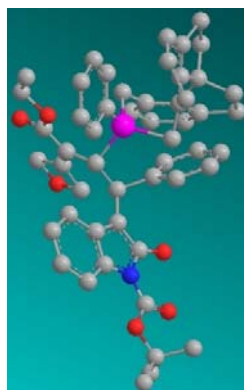

## K. References

- (1) (a) Gao, Y.; Zhang, J.; Shan, W.; Fei, W.; Yao, J.; Yao, W. Enantioselective Phosphine-Catalyzed Trimerization of  $\gamma$ -Aryl-3-butynoates via Isomerization/[3 + 2] Cyclization/Michael Addition Cascade. *Org. Lett.* **2021**, *23*, 6377–6381. (b) Zhang, J.; Hao, W.; Chen, Y.; Wang, Z.; Yao, J.; Yao, W. Phosphine-catalyzed Rauhut–Currier reaction of  $\gamma$ -alkyl allenolate and subsequent trapping using the Diels–Alder reaction. *Chem. Commun.*, **2023**, *59*, 11720–11723. (c) Hou, J.; Hao, W.; Chen, Y.; Wang, Z.; Yao, W. Phosphine-Catalyzed Stereospecific and Enantioselective Desymmetrization [3+2] Cycloaddition of MBH Carbonates and N-(2-tert-Butylphenyl)maleimides. *J. Org. Chem.* **2024**, DOI:10.1021/acs.joc.4c00555.
- (2) (a) Silm, E.; Järving, I.; Kanger, T. Asymmetric organocatalytic Michael addition of cyclopentane-1,2-dione to alkylidene oxindole. *Beilstein J. Org. Chem.* **2022**, *18*, 167–173. (b) Roy, P.; Anjum, S. R.; Sanwal, S. D.; Ramachary, D. B. Direct organocatalytic transfer hydrogenation and C–H oxidation: high-yielding synthesis of 3-hydroxy-3-alkyloxindoles. *Org. Biomol. Chem.* **2023**, *21*, 8335–8343. (c) Patra, A.; Bhunia, A.; Yetra, S. R.; Gonnadeb, R. G.; Biju, A. T. Diastereoselective synthesis of cyclopentanone-fused spirooxindoles by N-heterocyclic carbene-catalyzed homoenolate annulation with isatilidenes. *Org. Chem. Front.* **2015**, *2*, 1584–1588.

# L. NMR Spectra

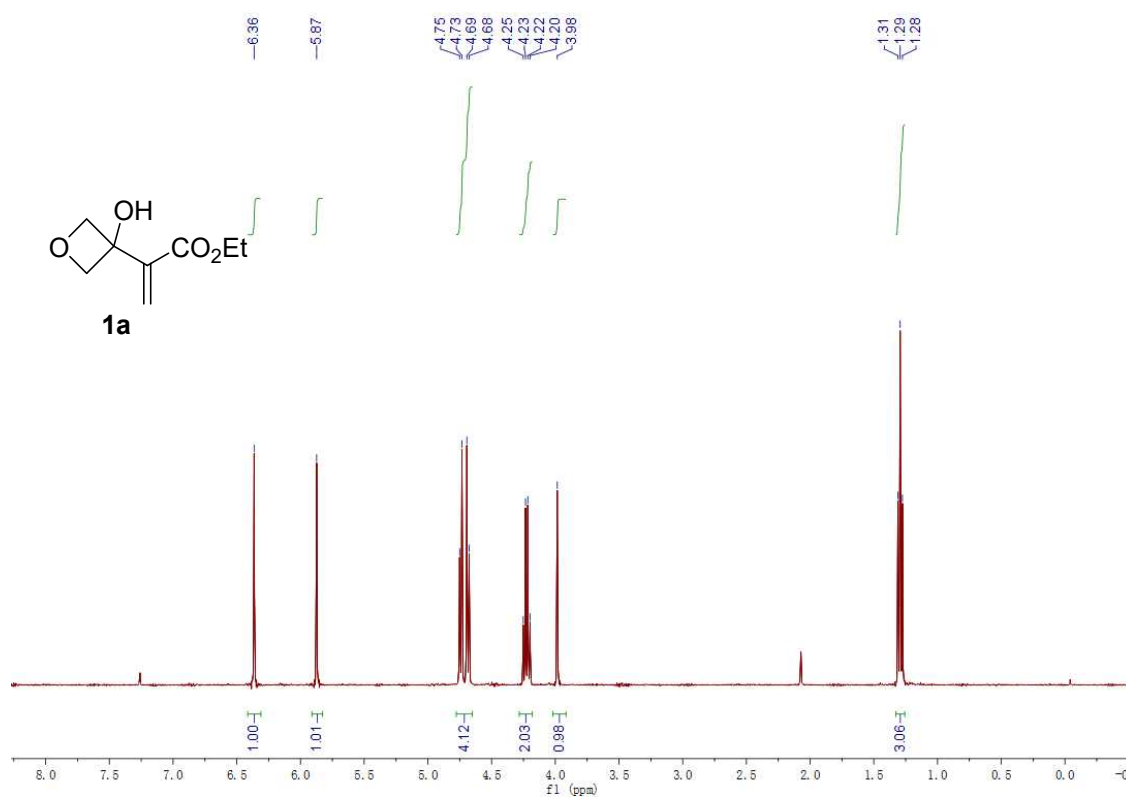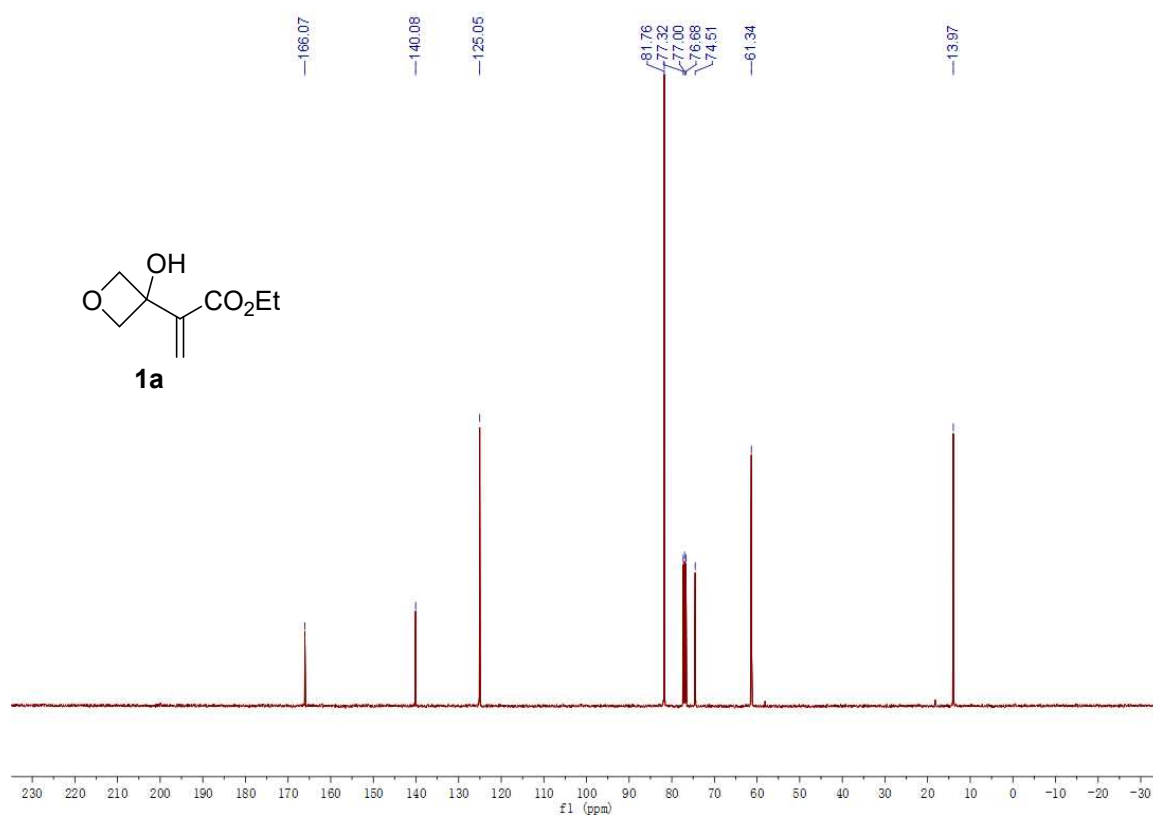

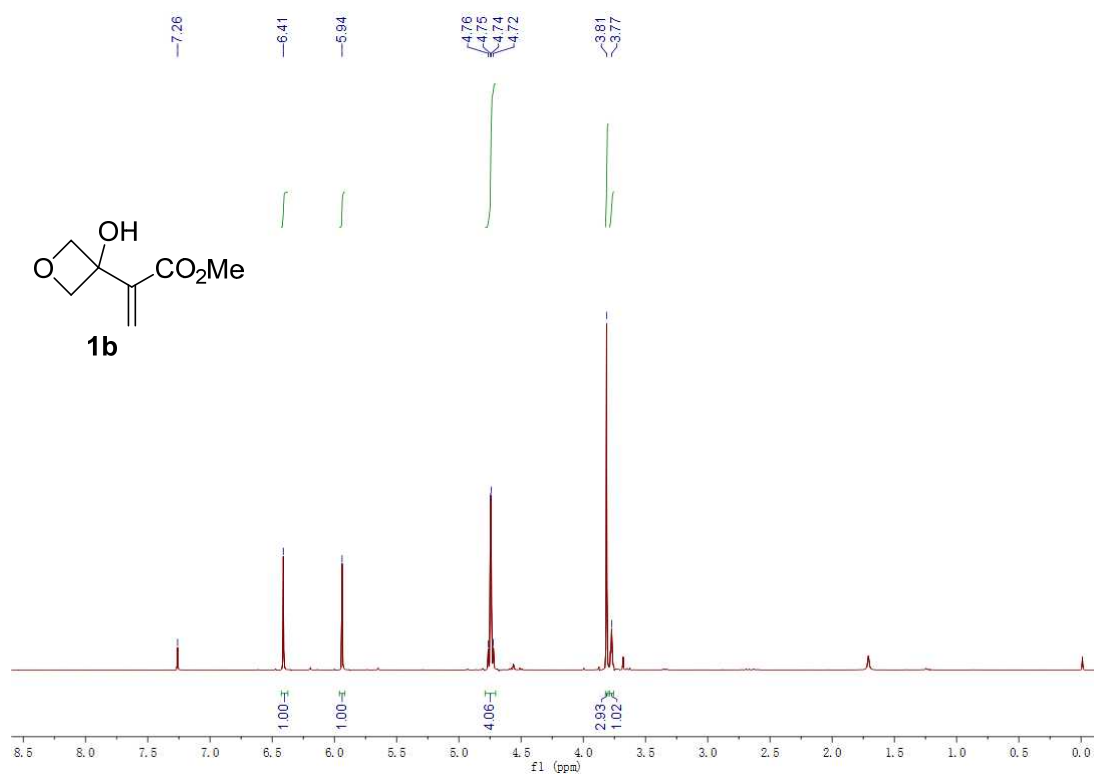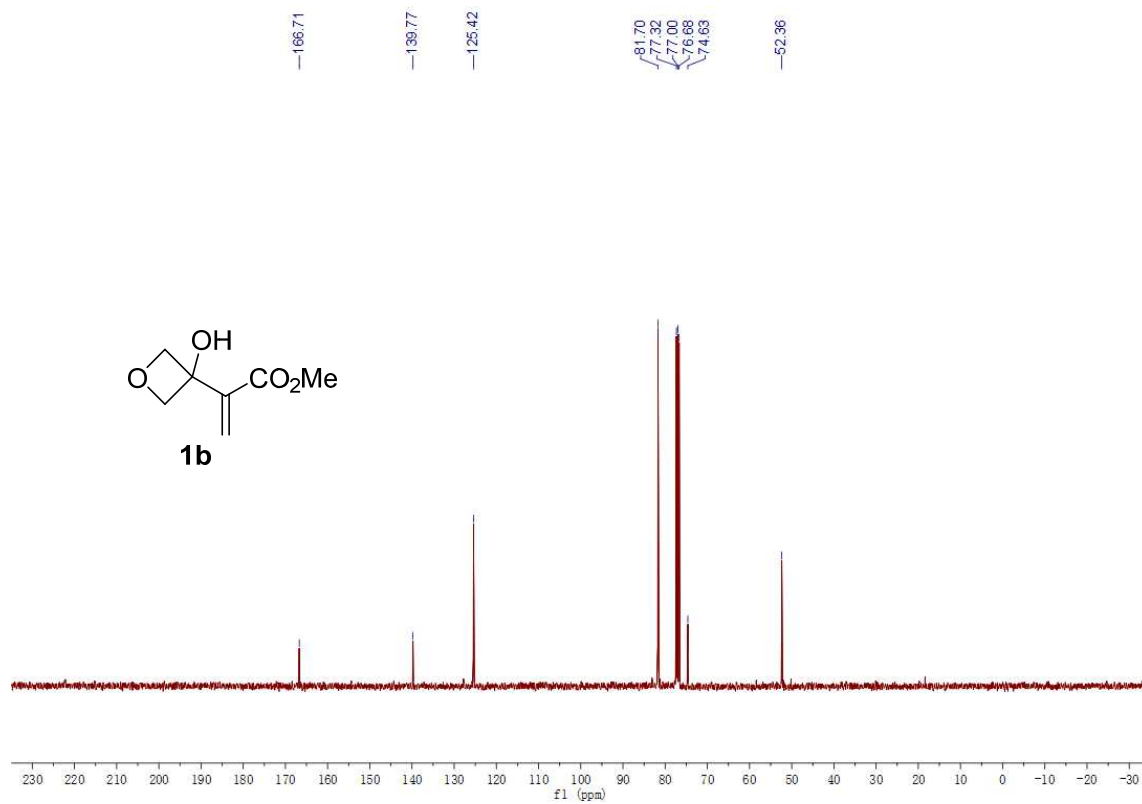



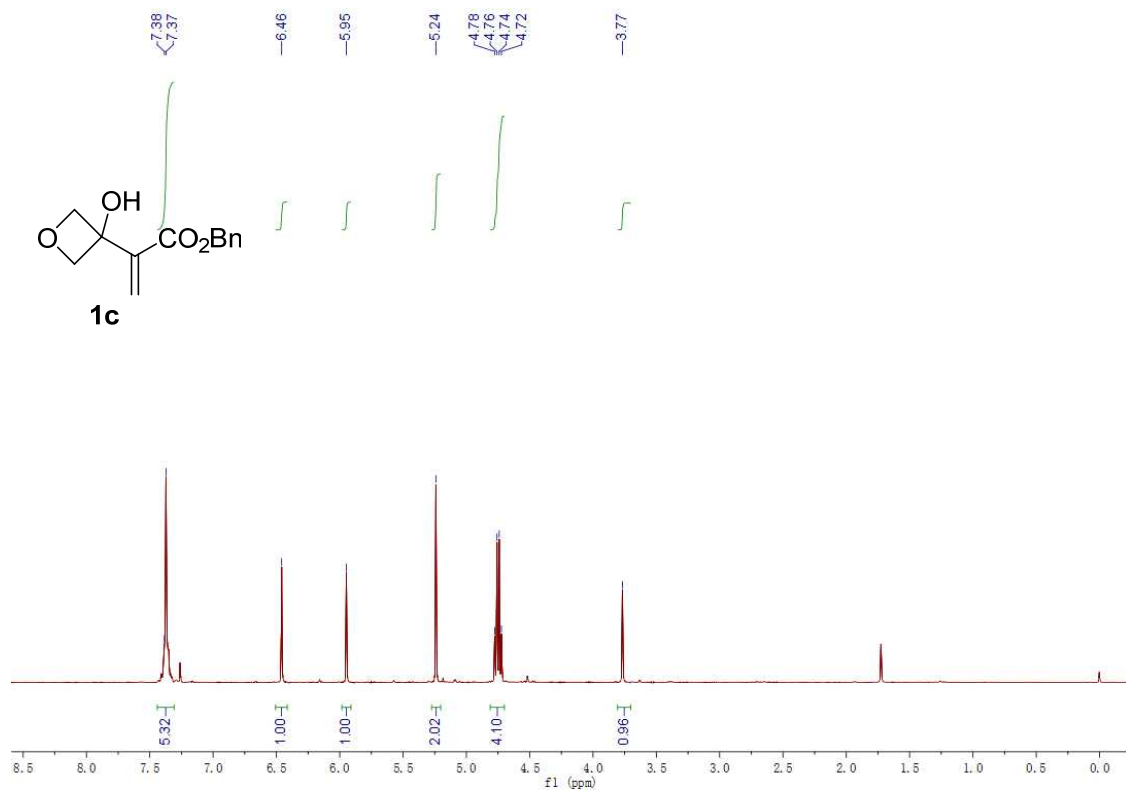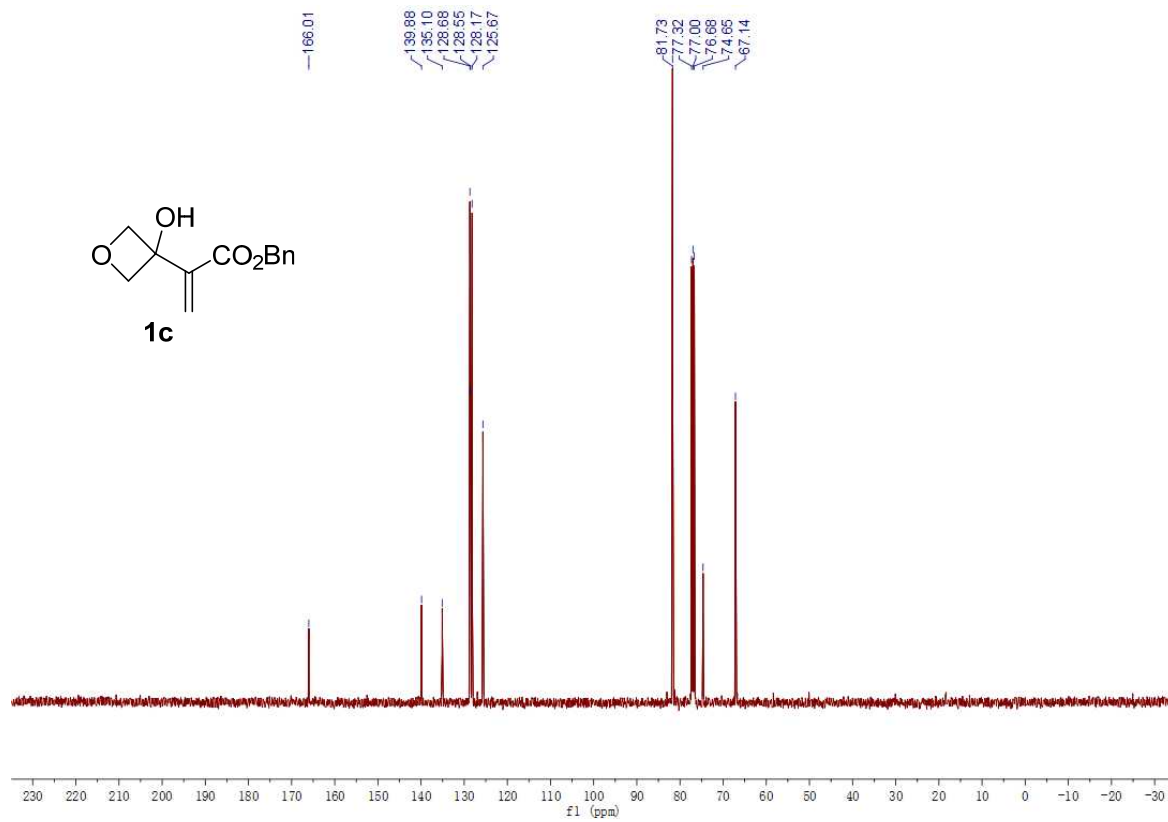

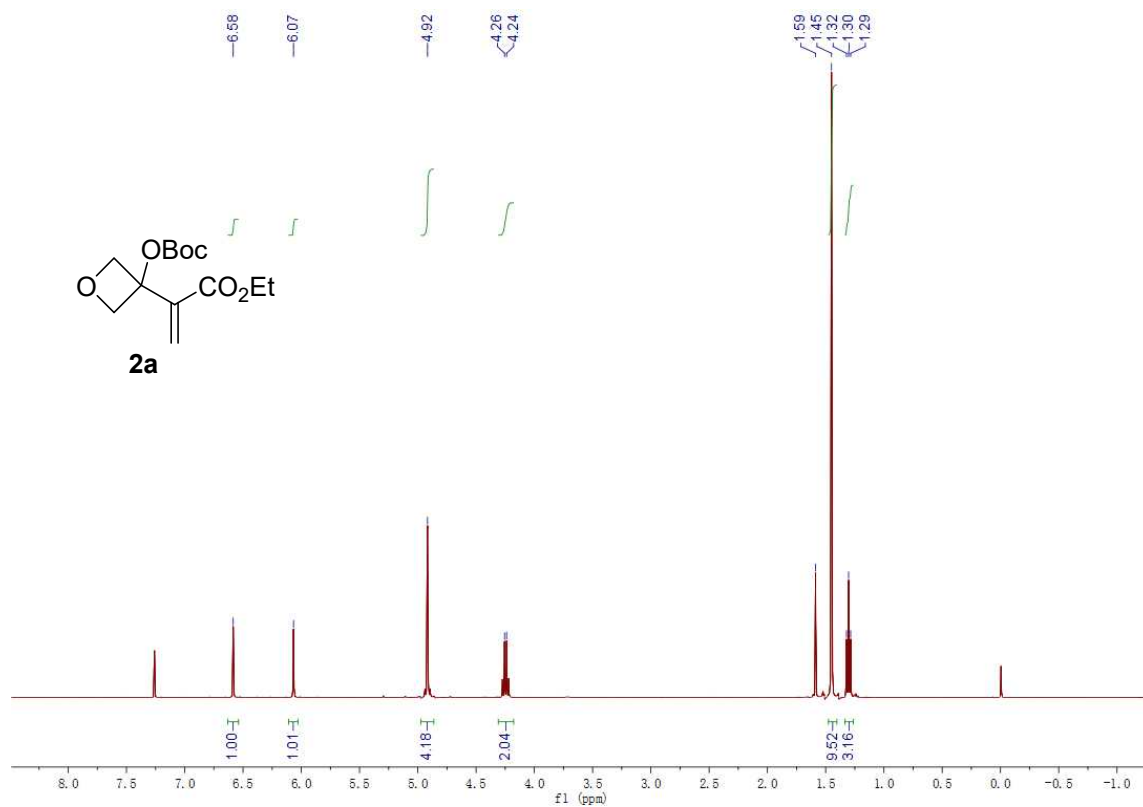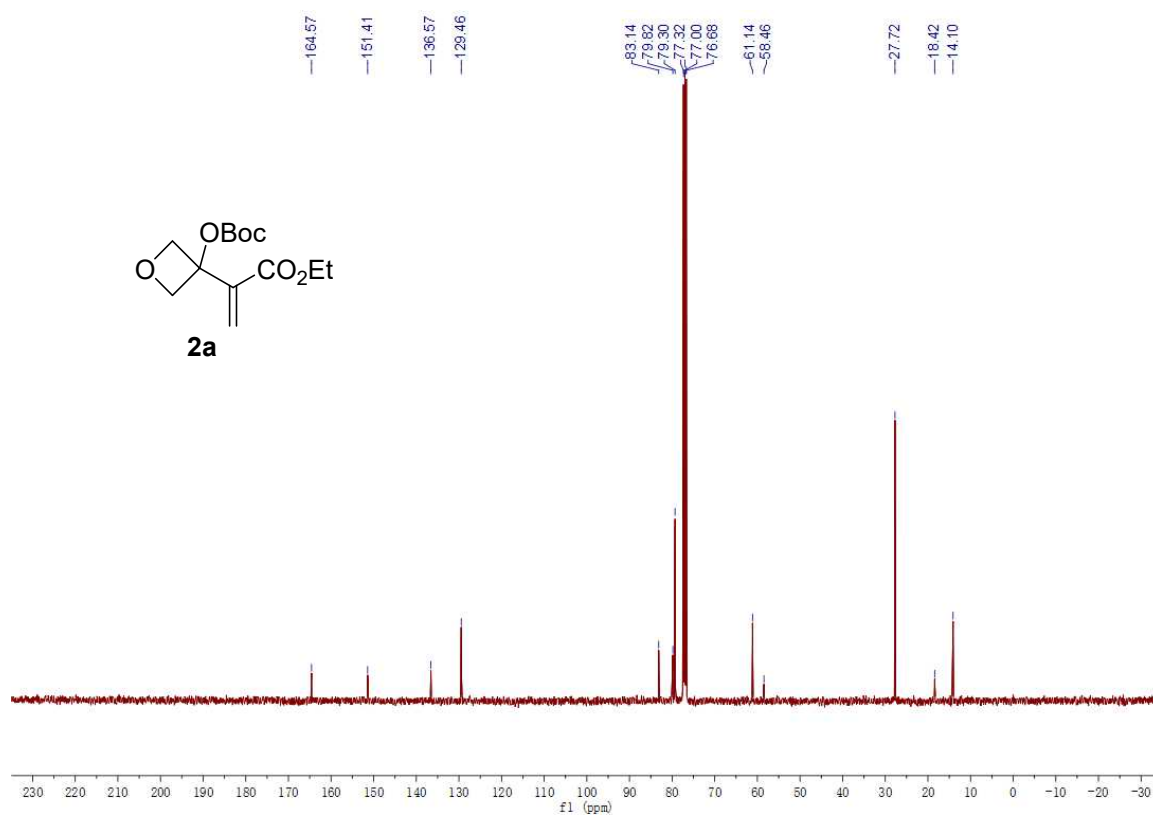

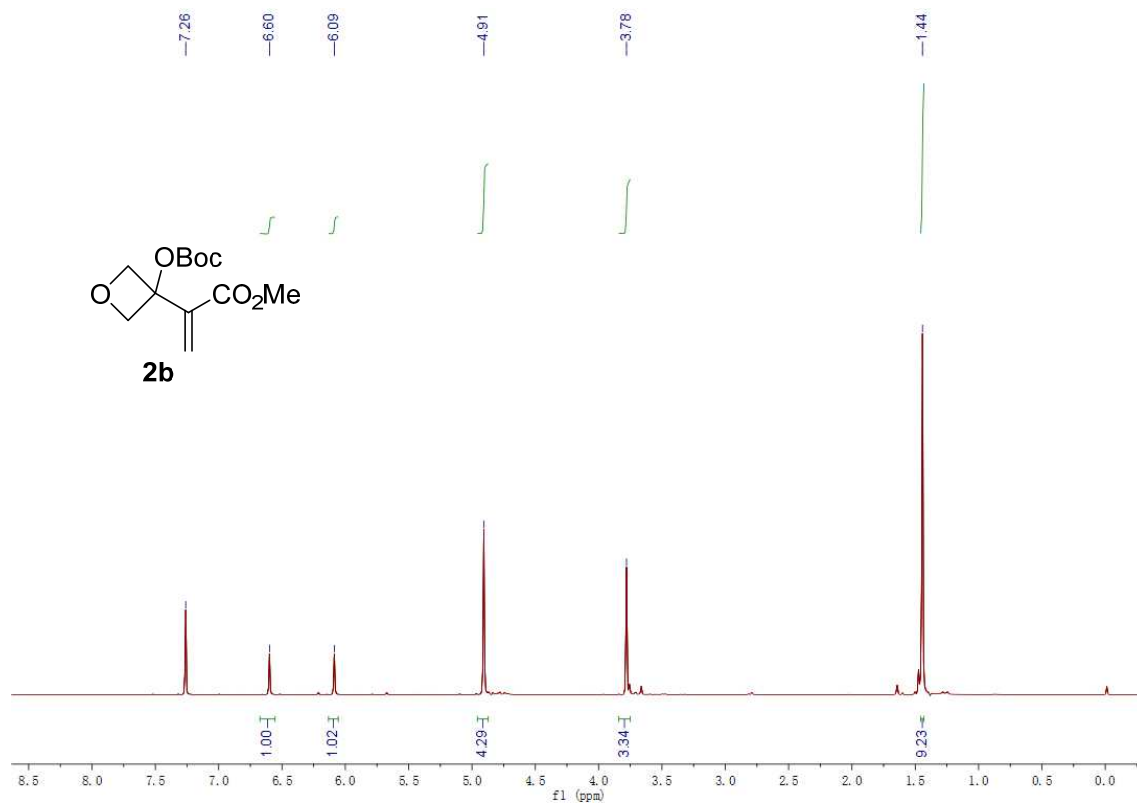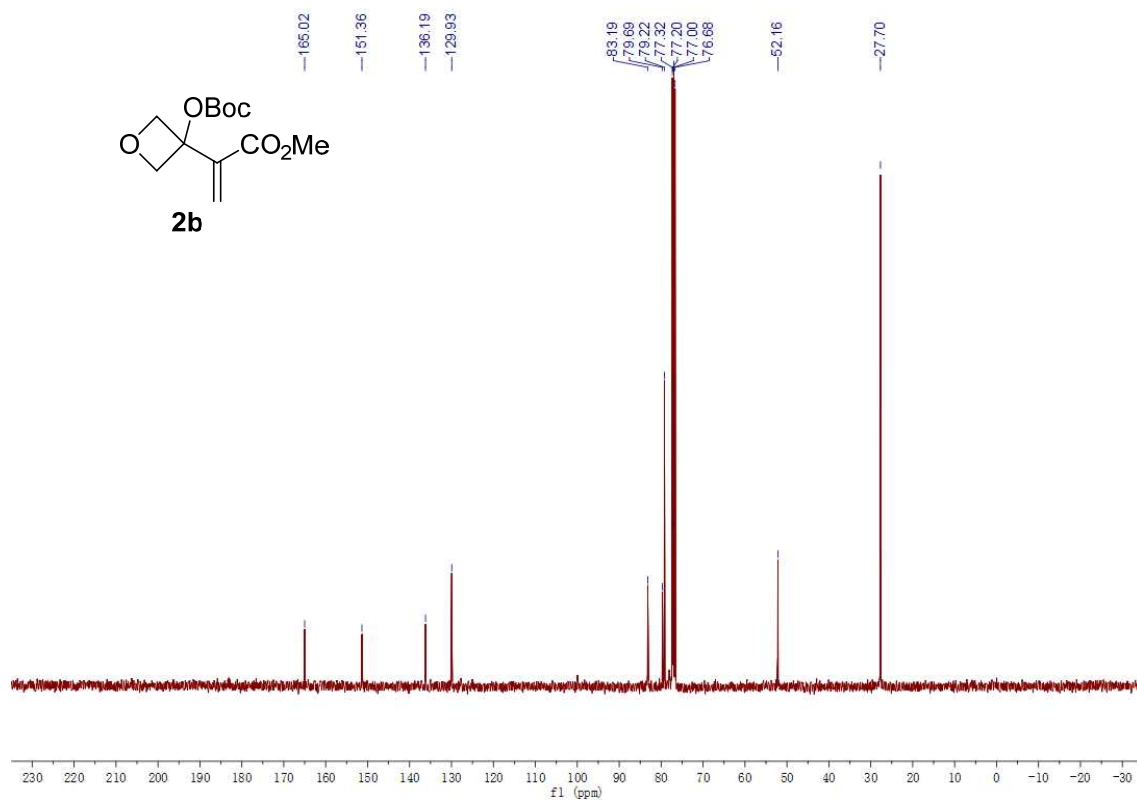

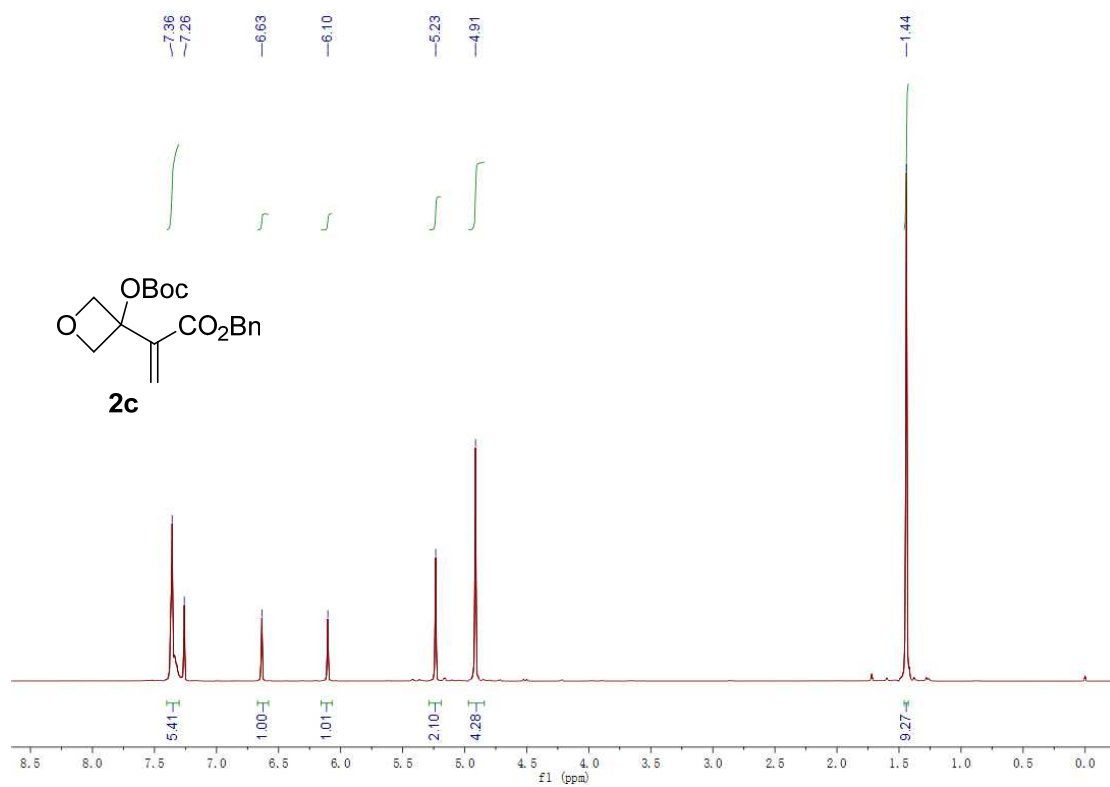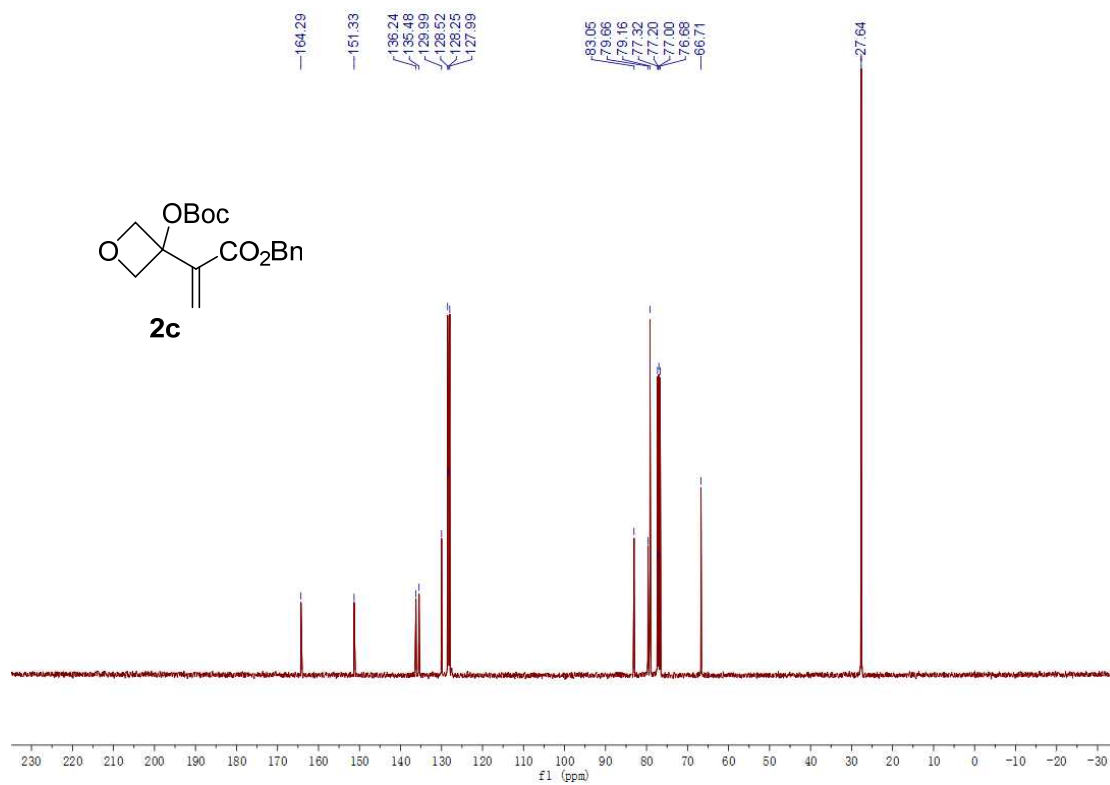

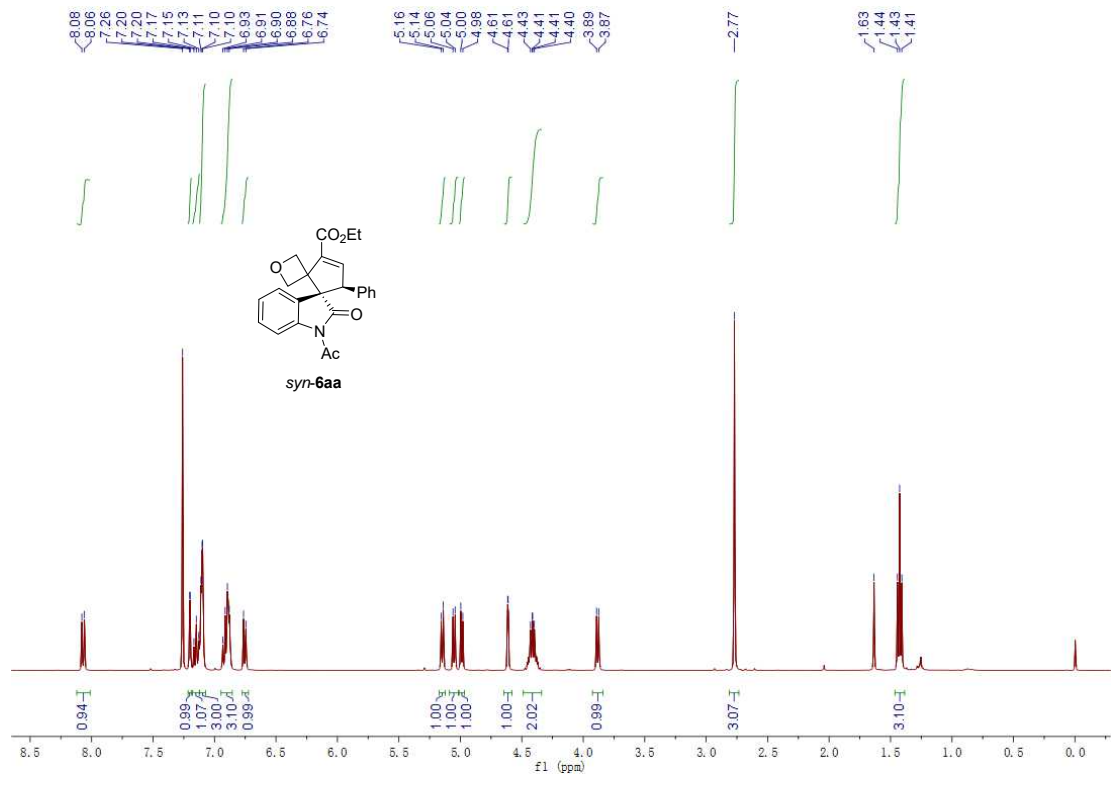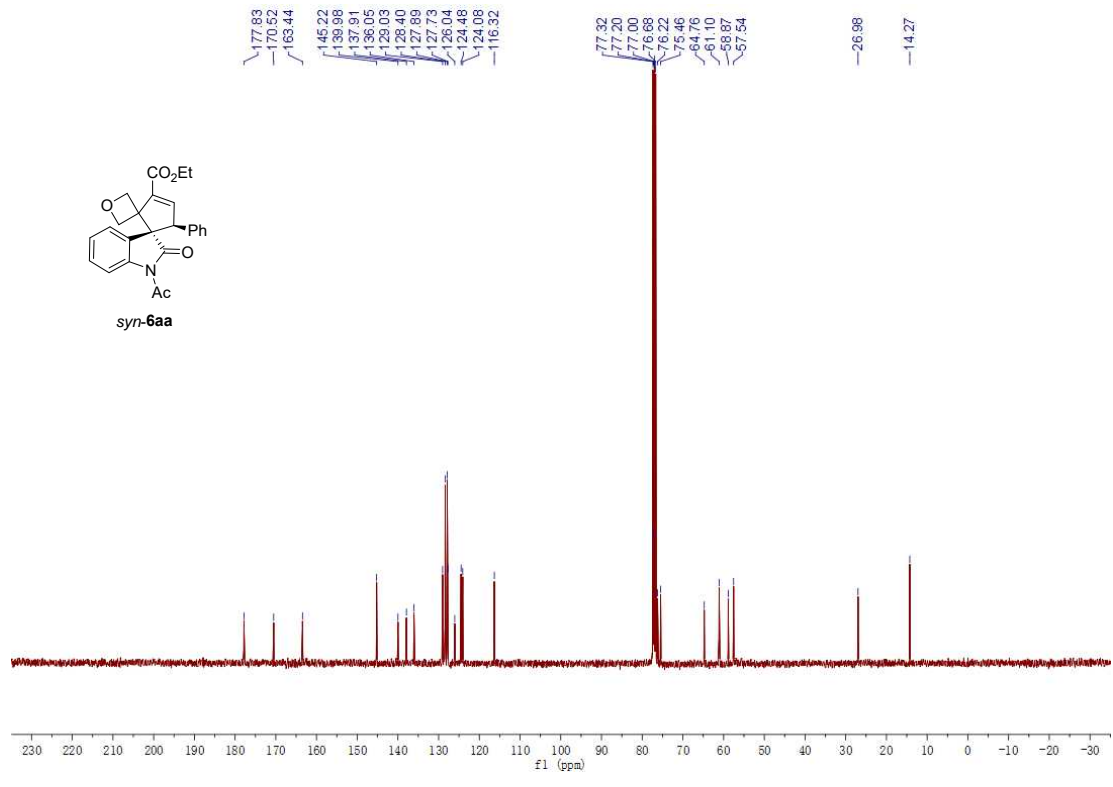

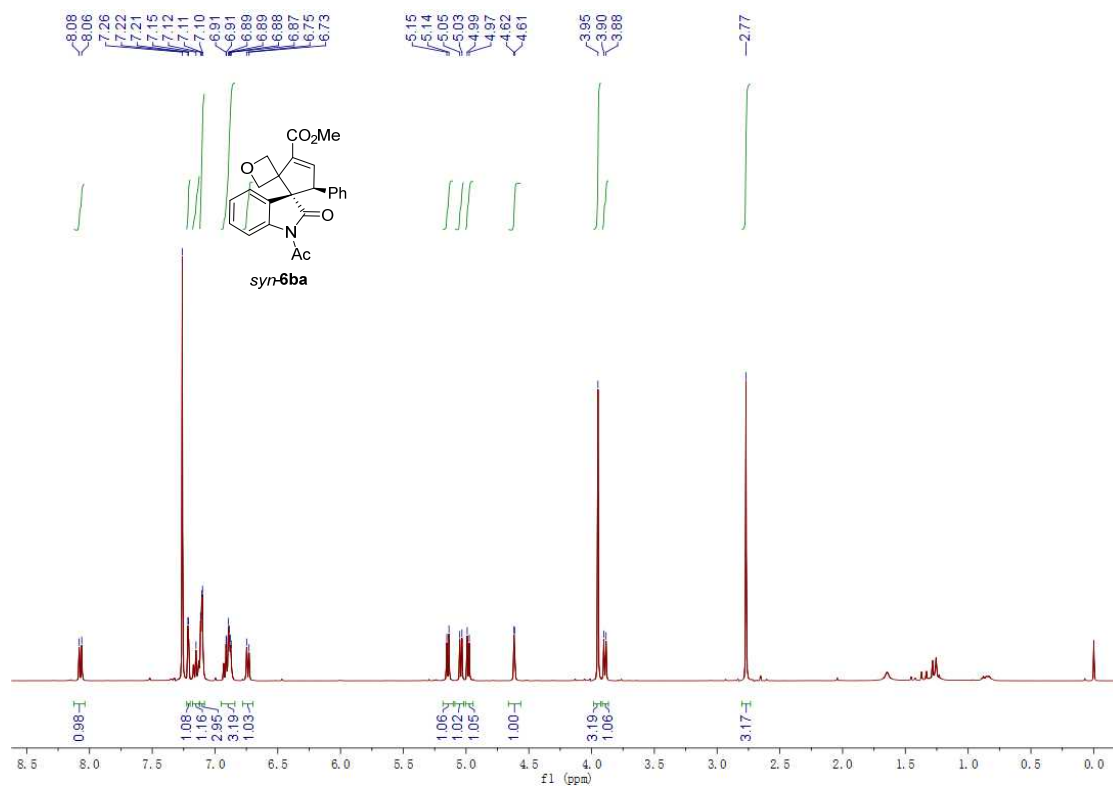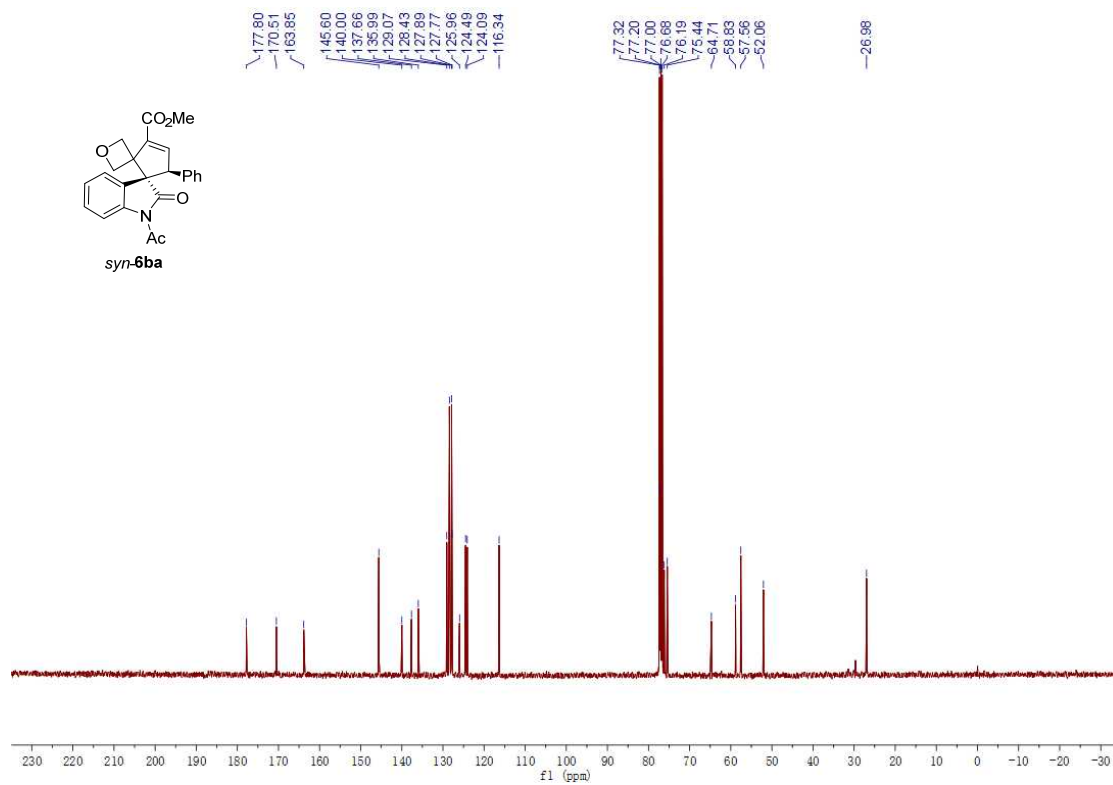

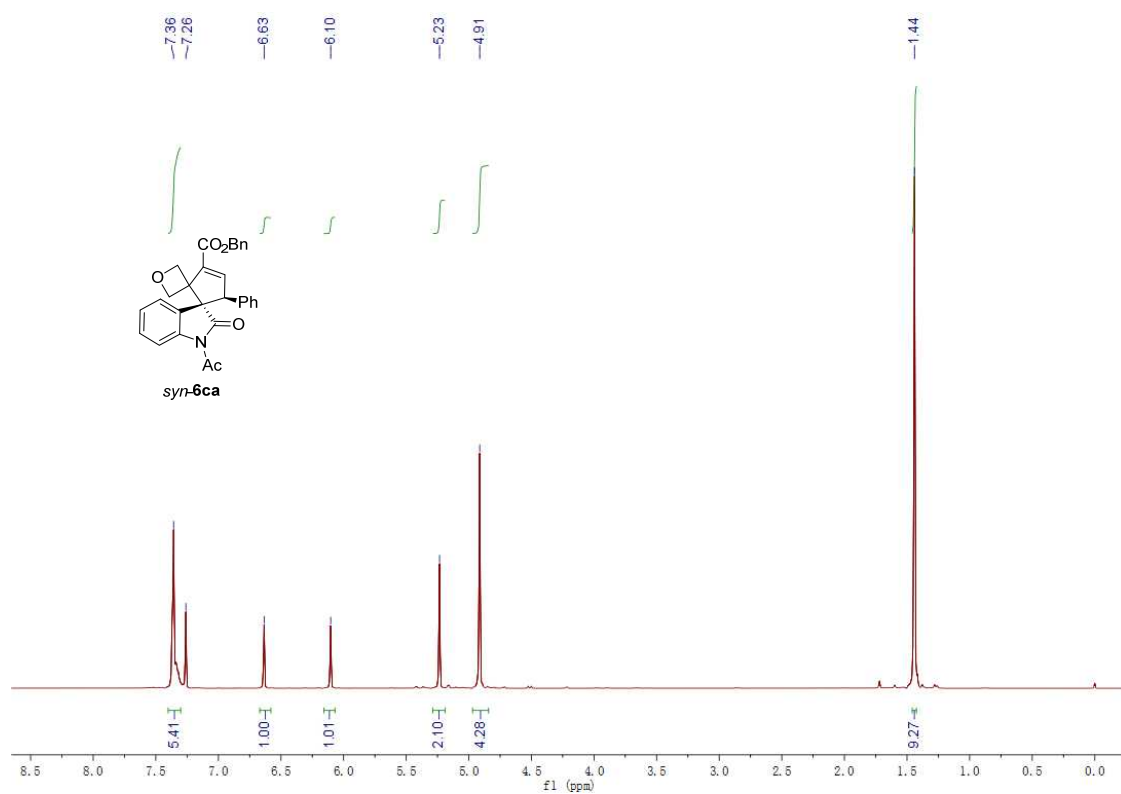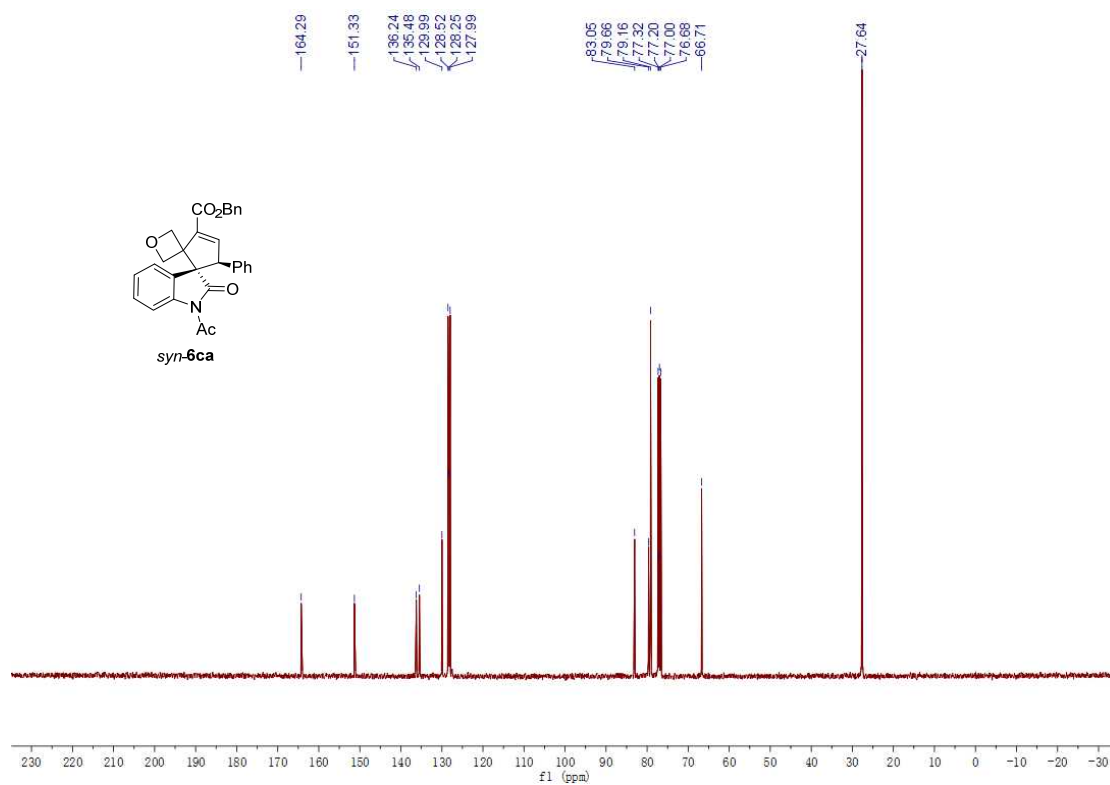

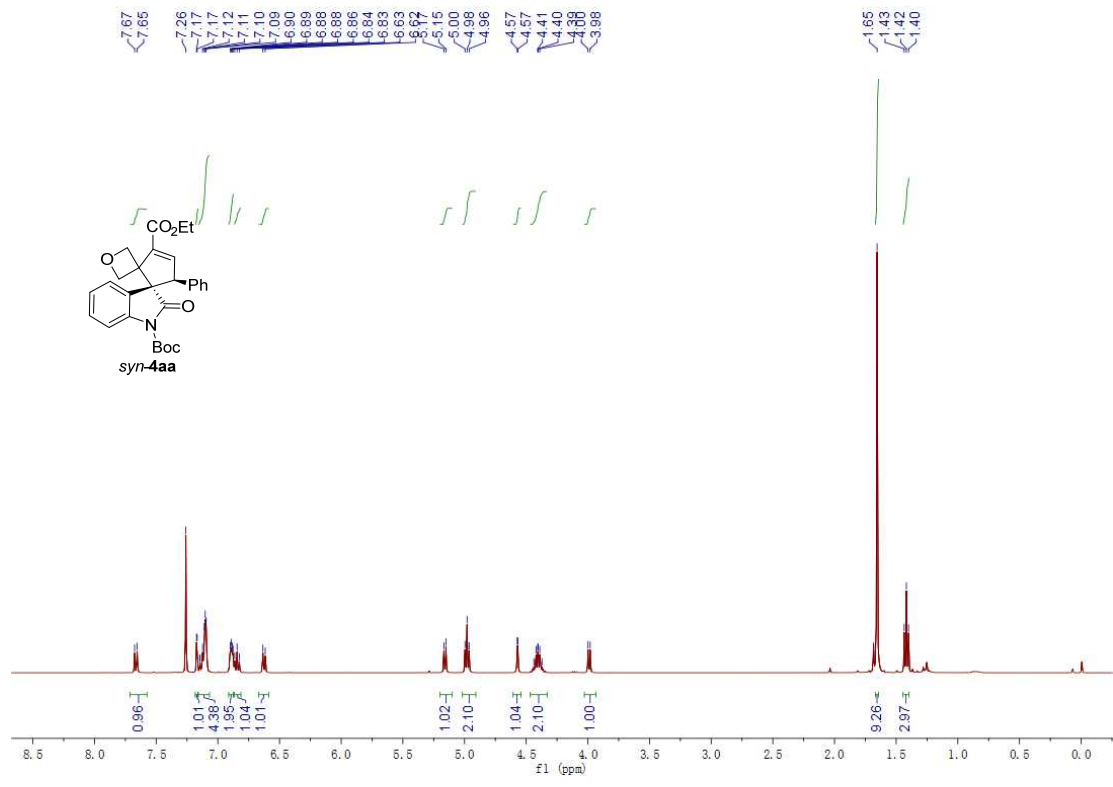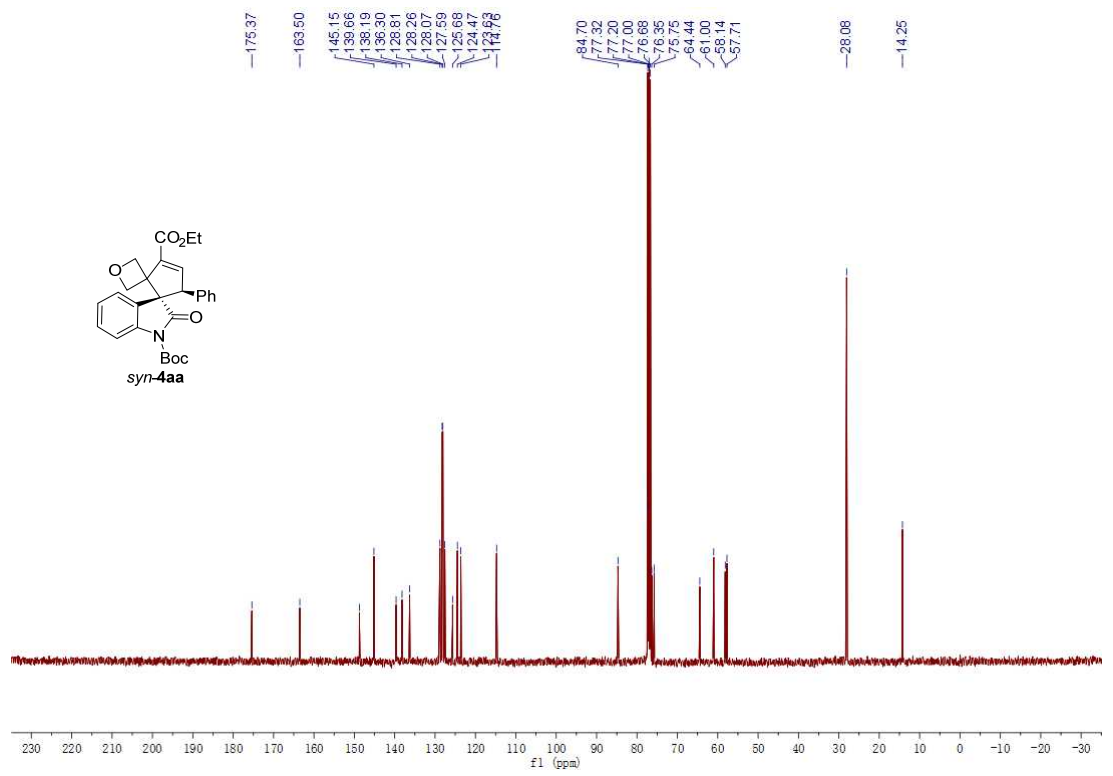



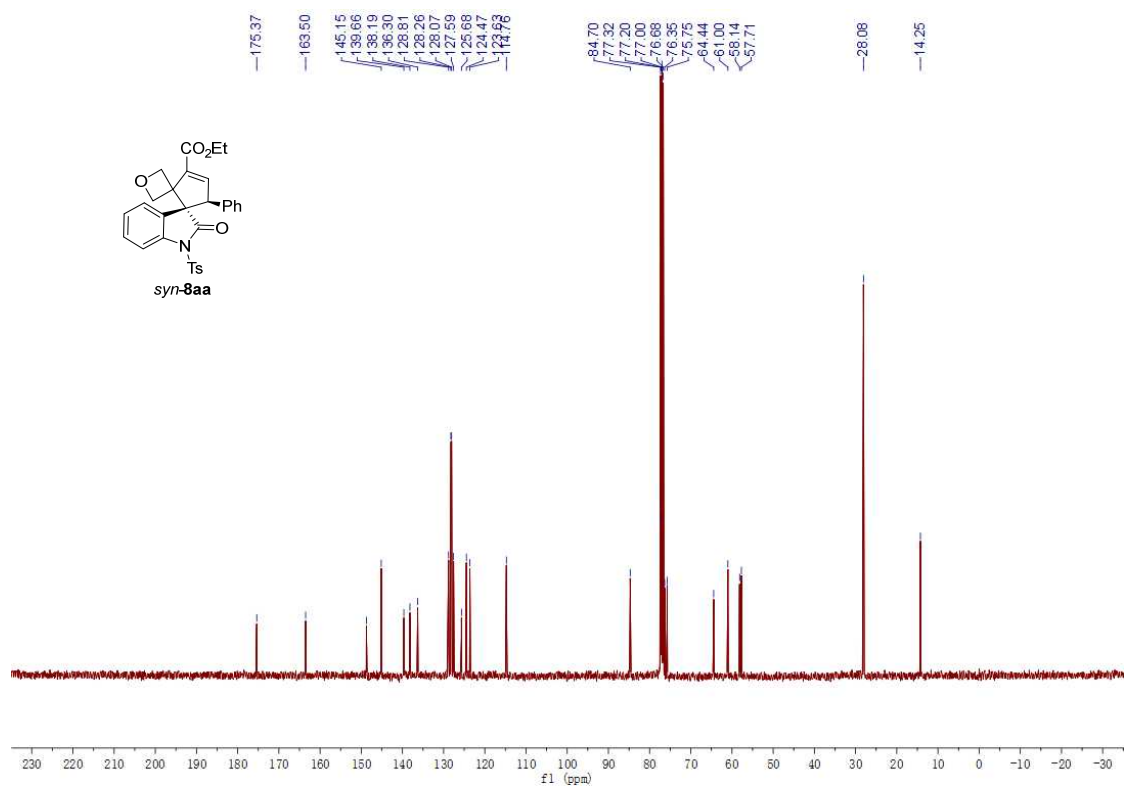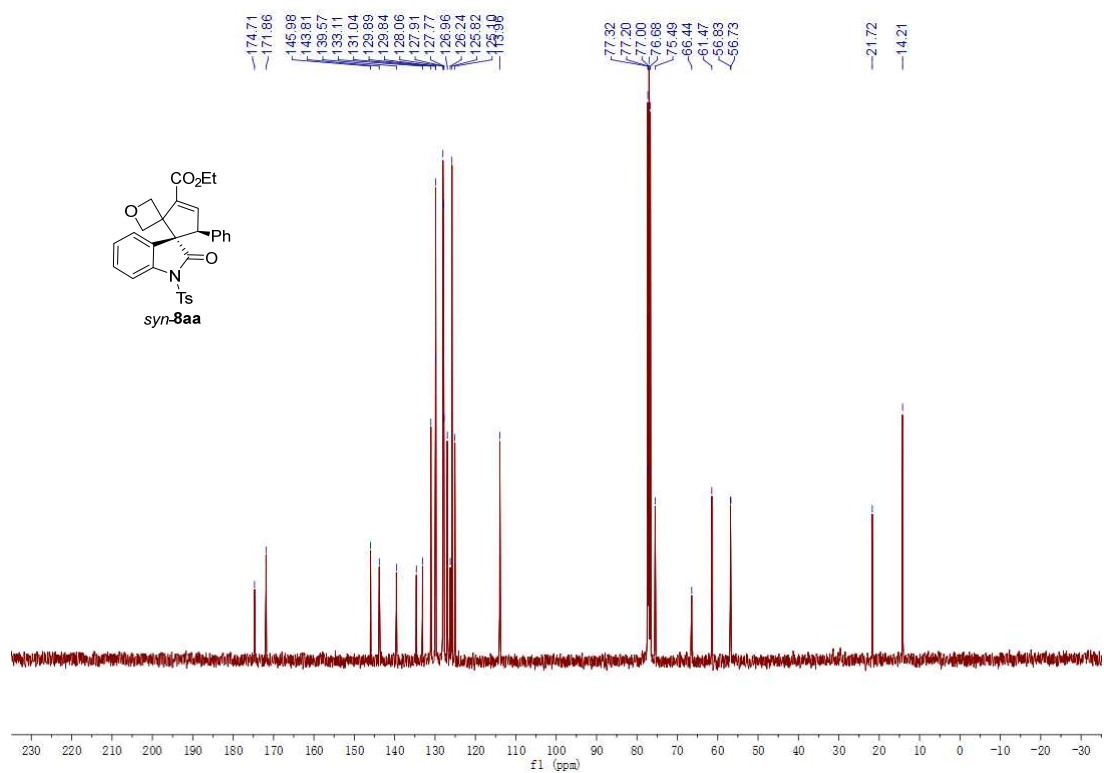

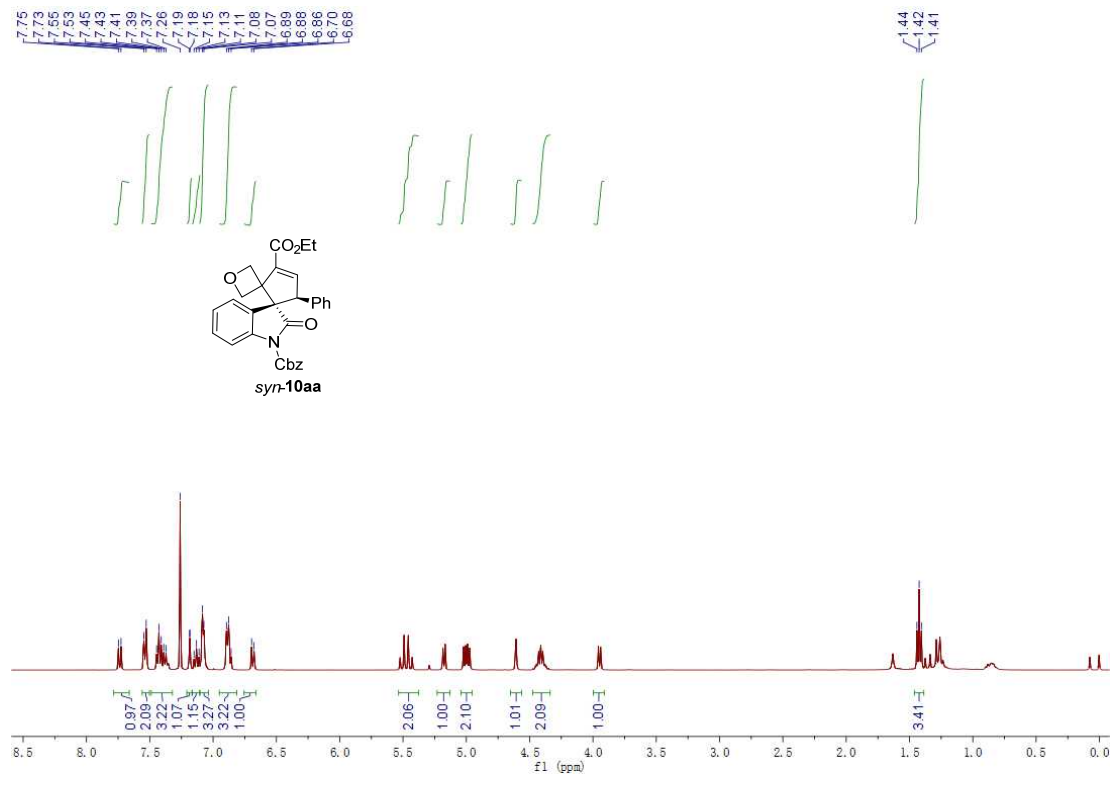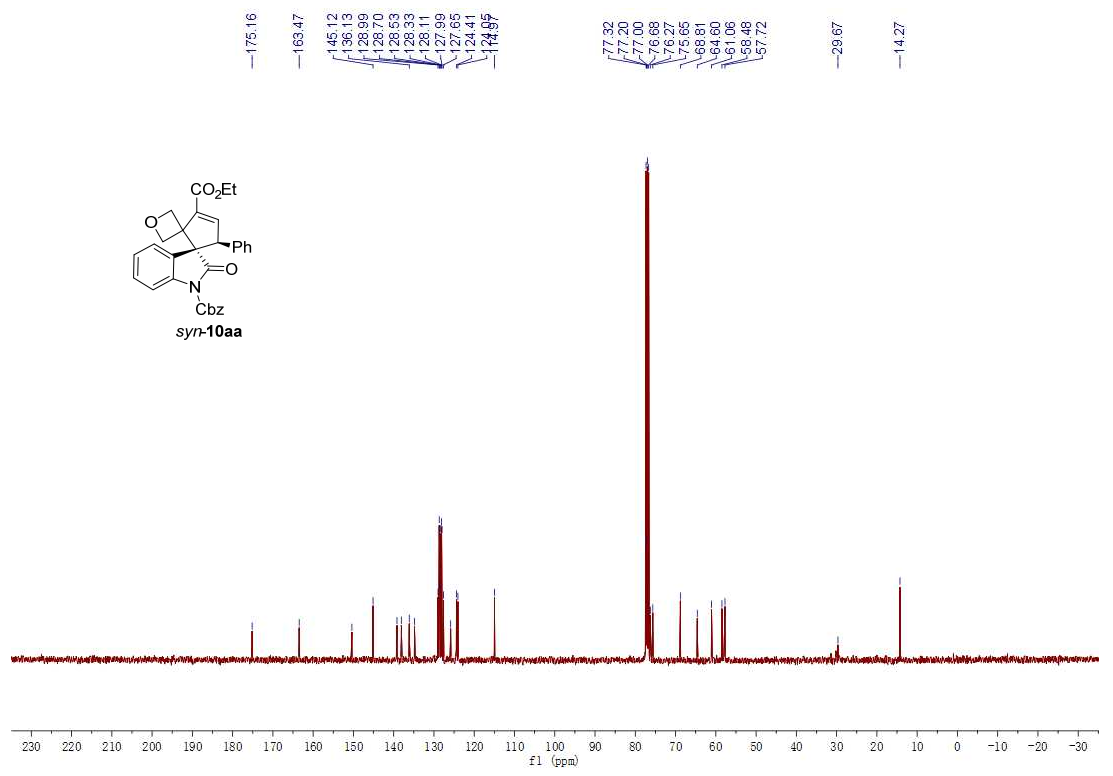

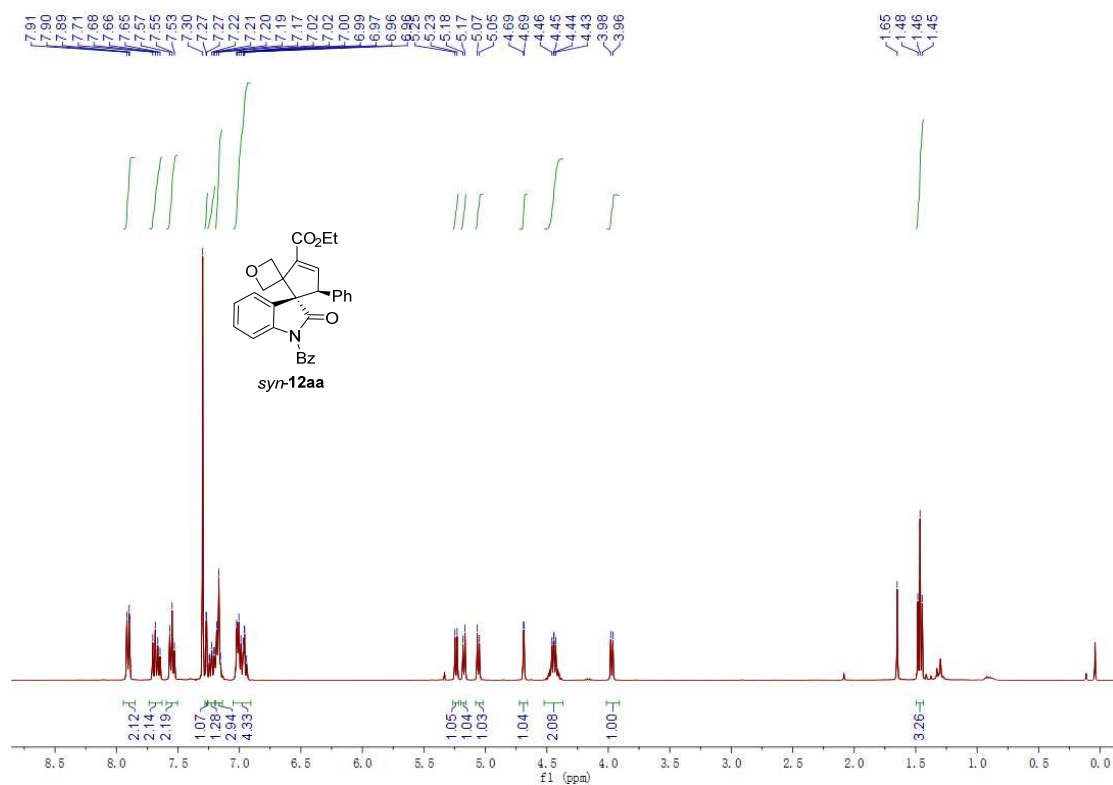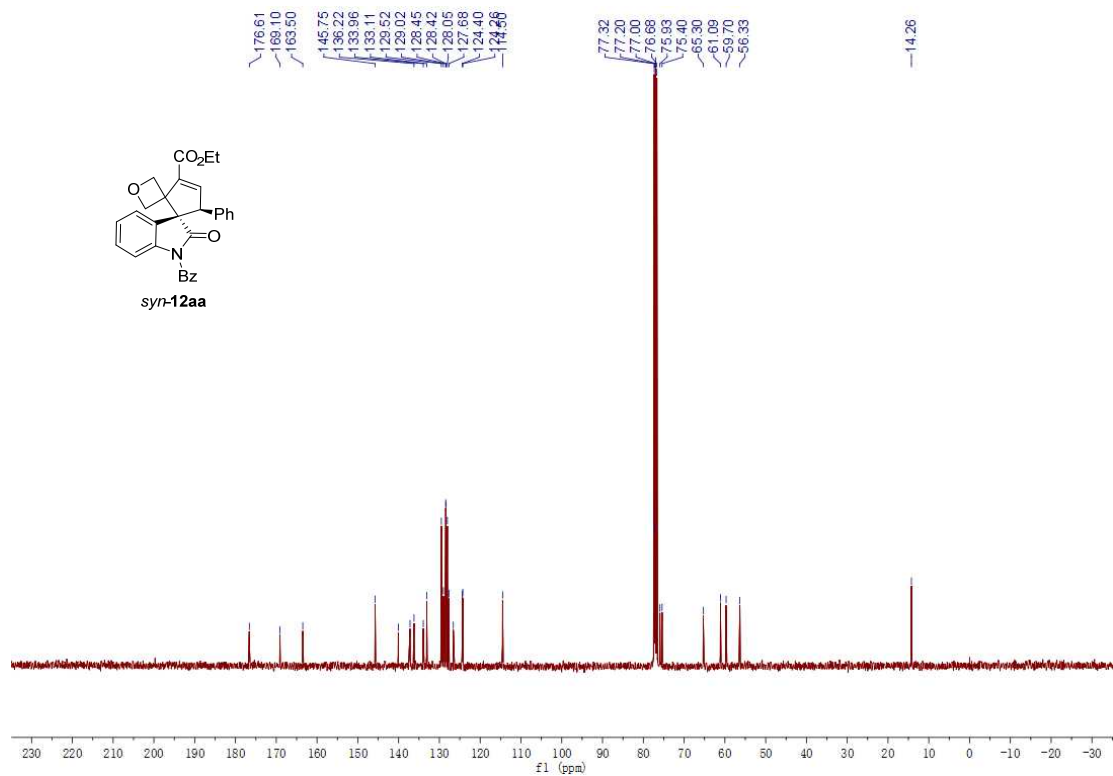

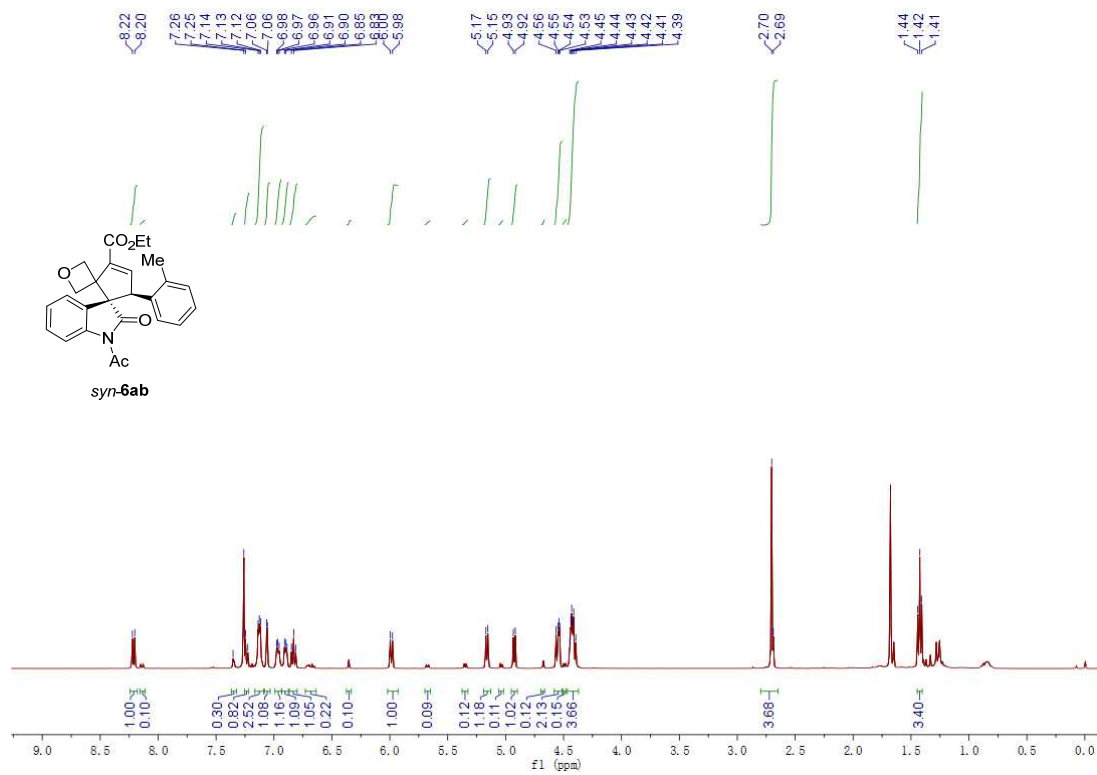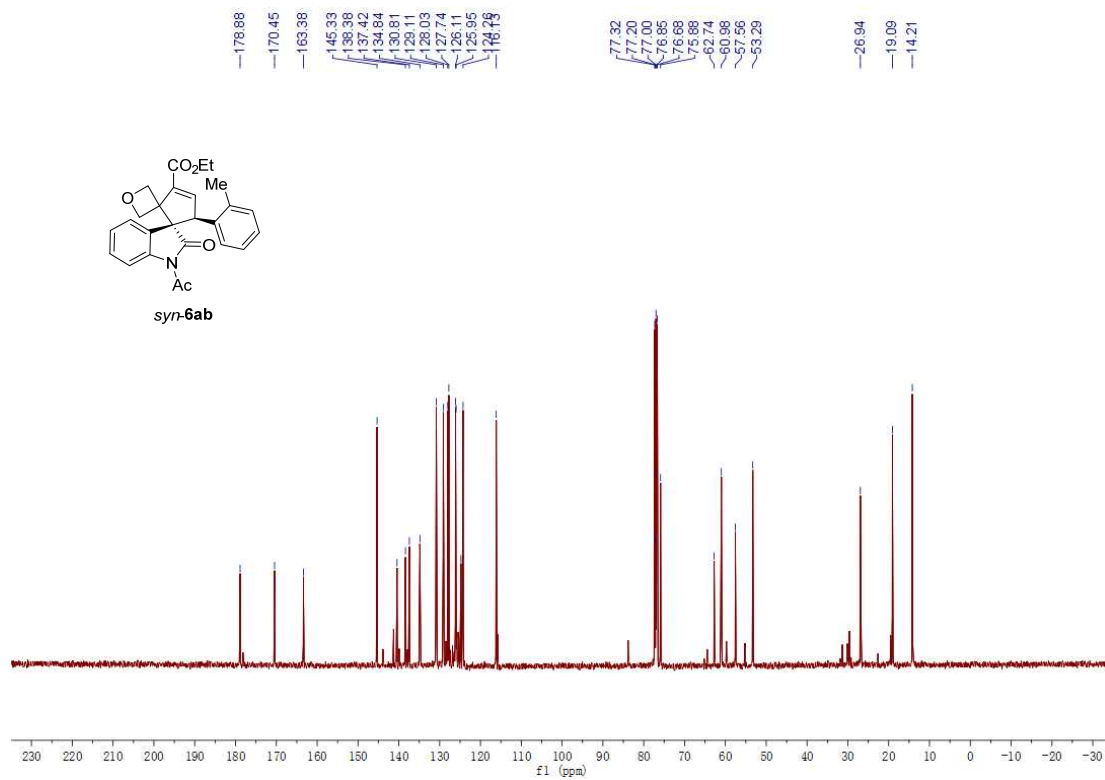

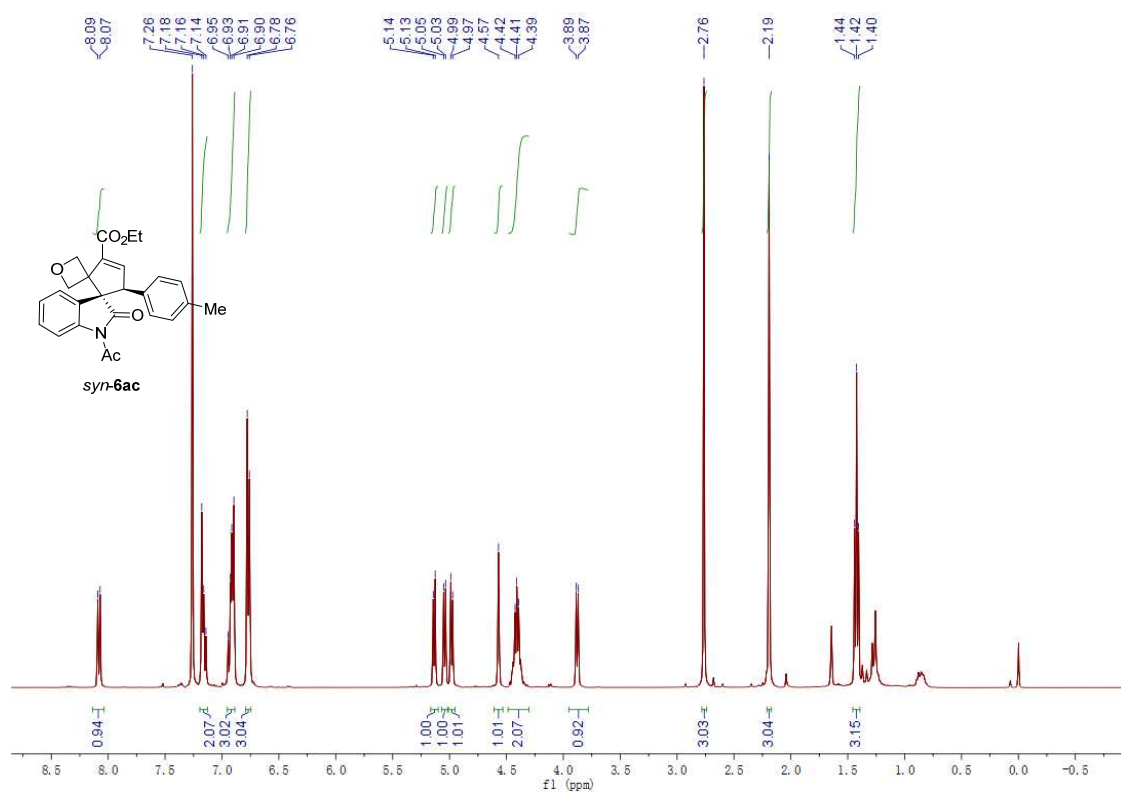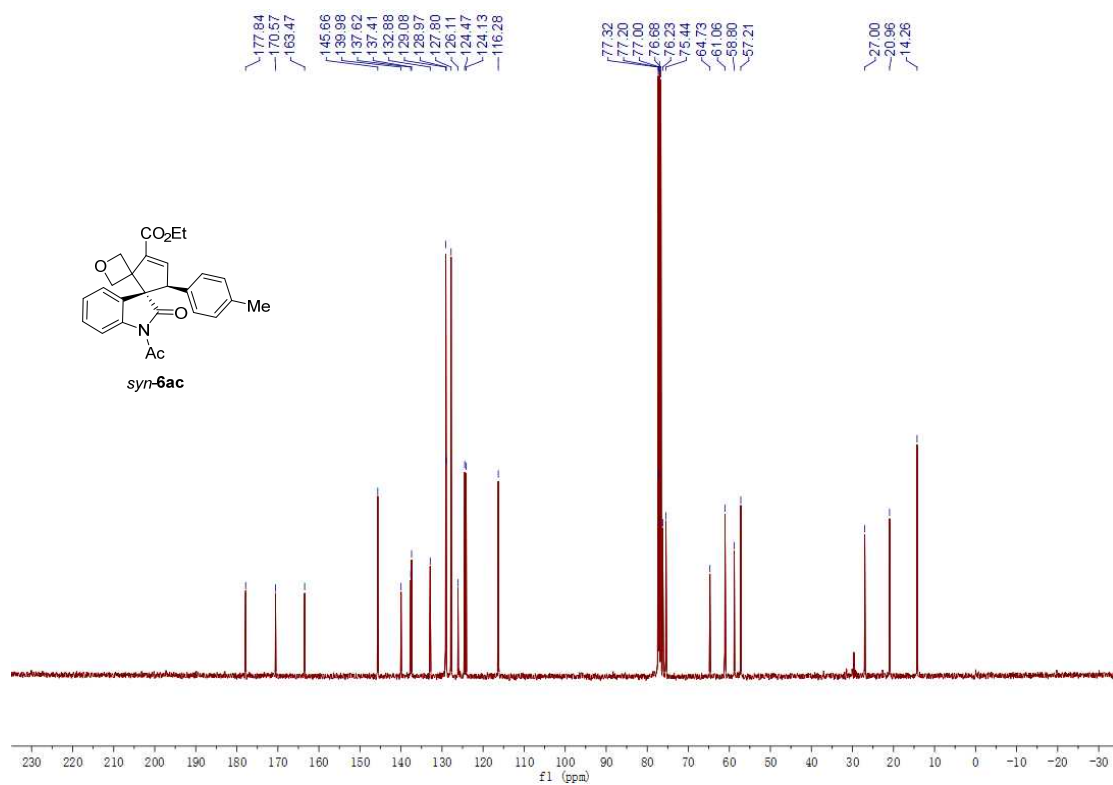

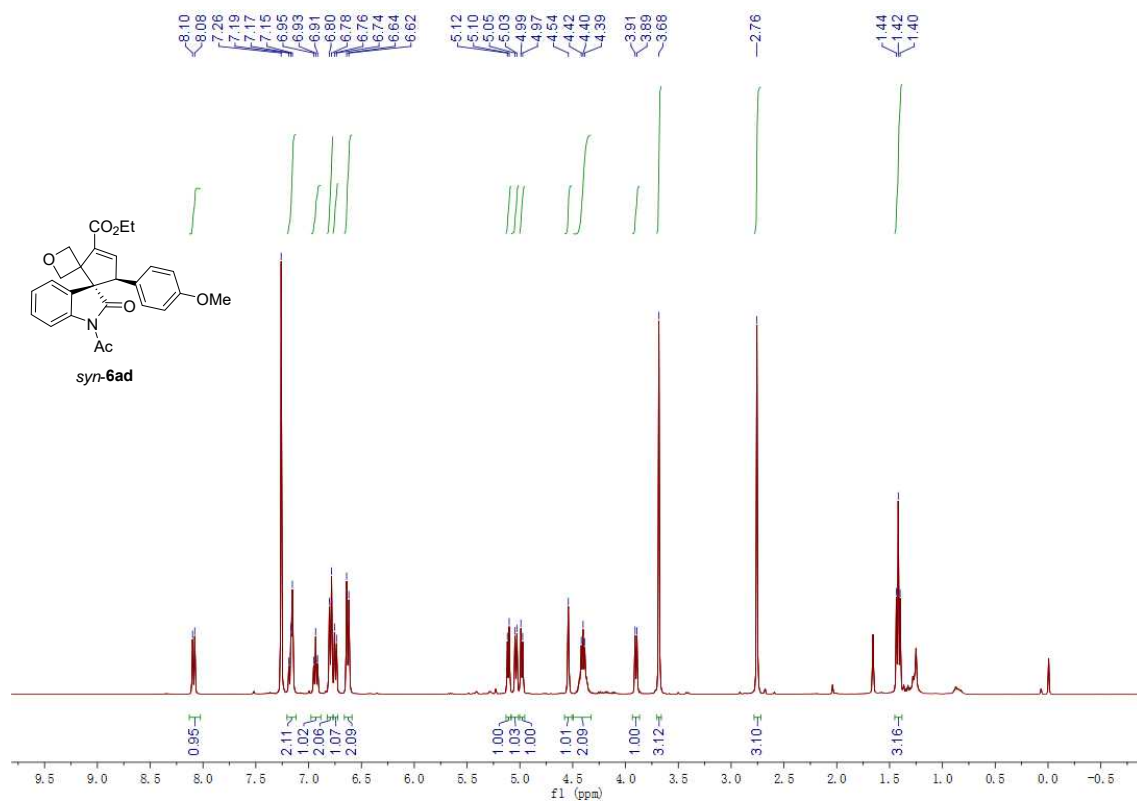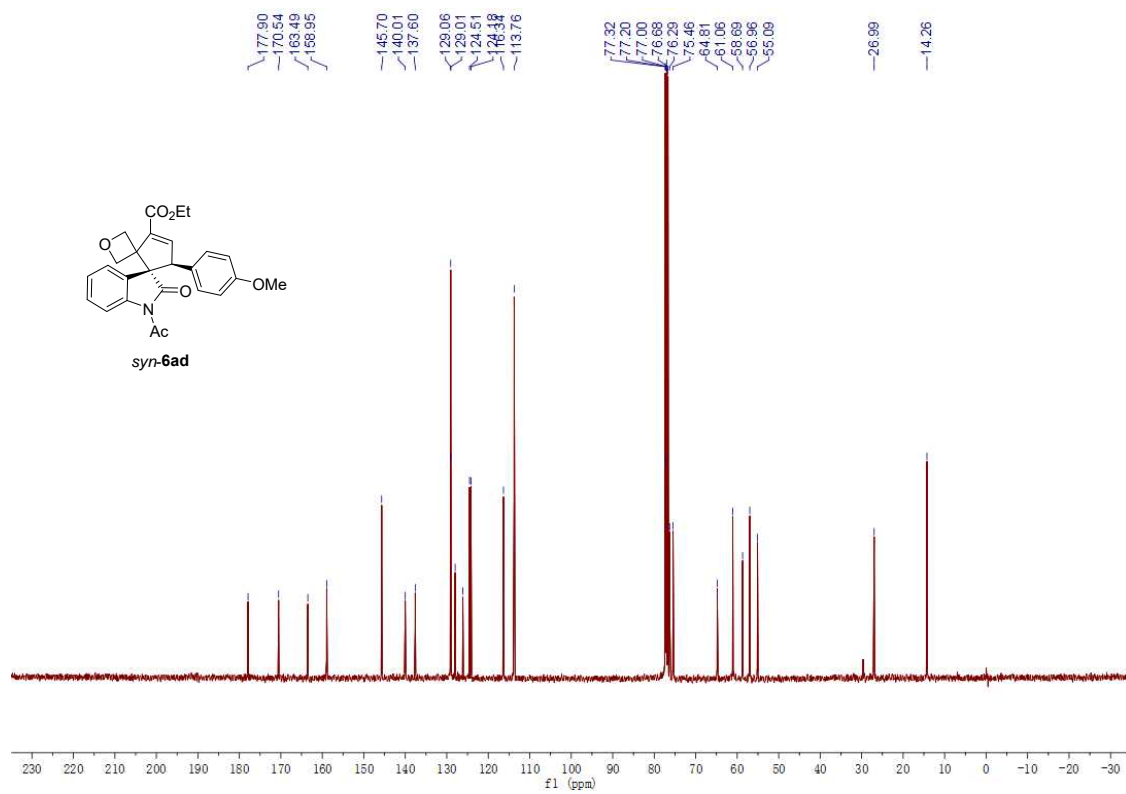

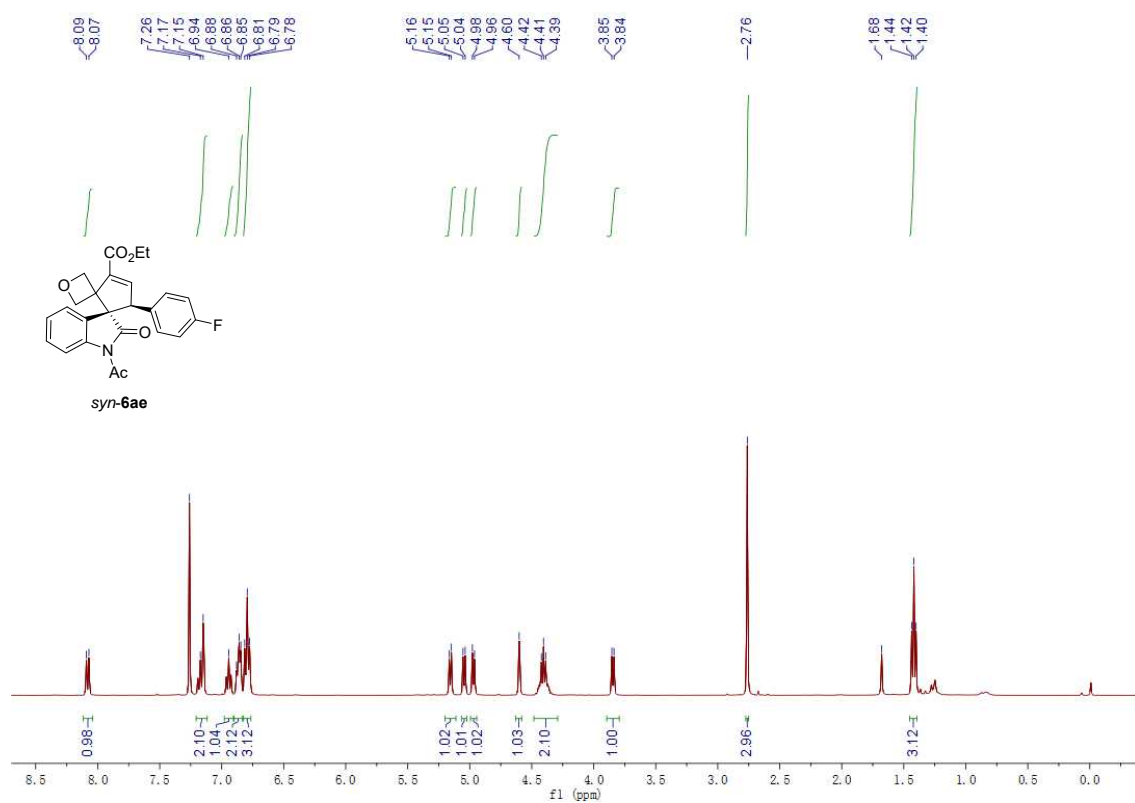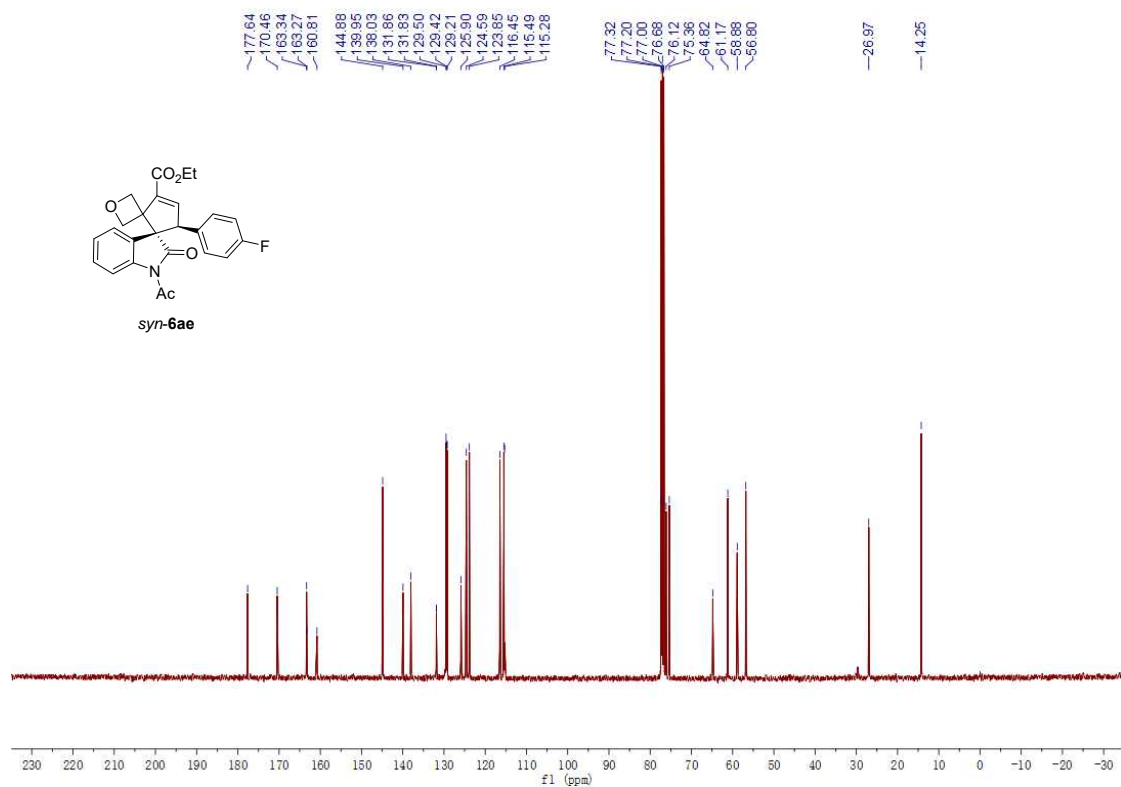

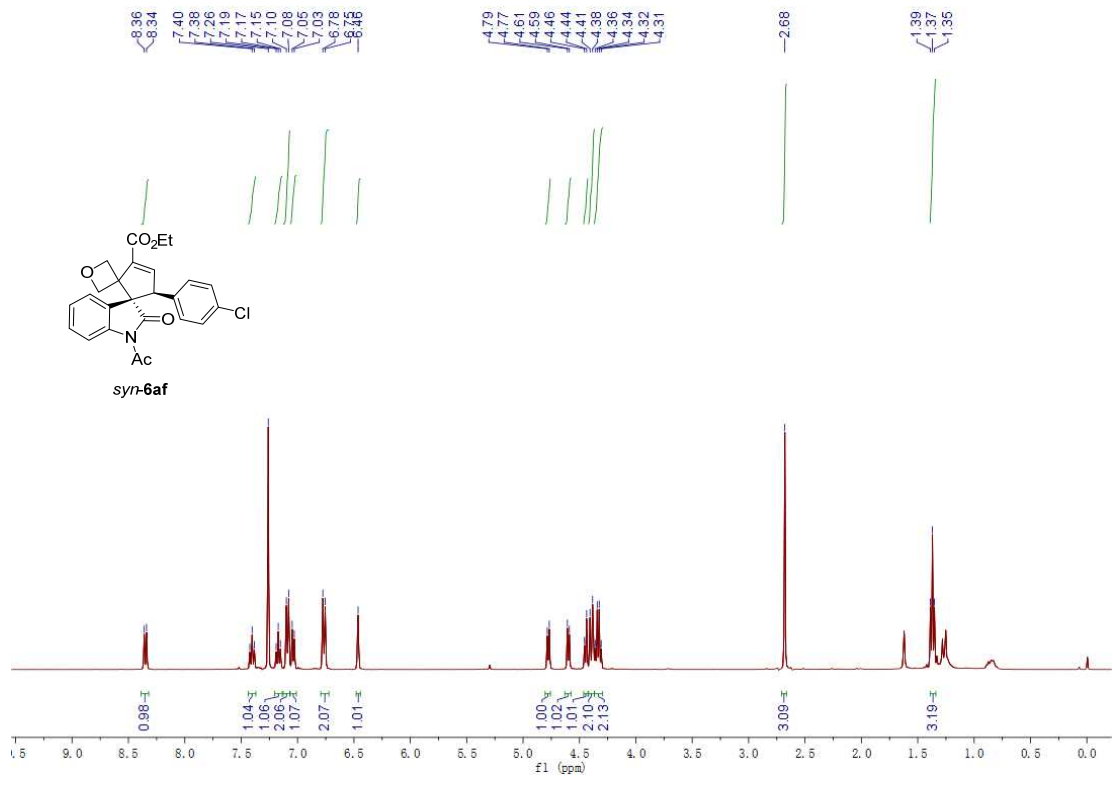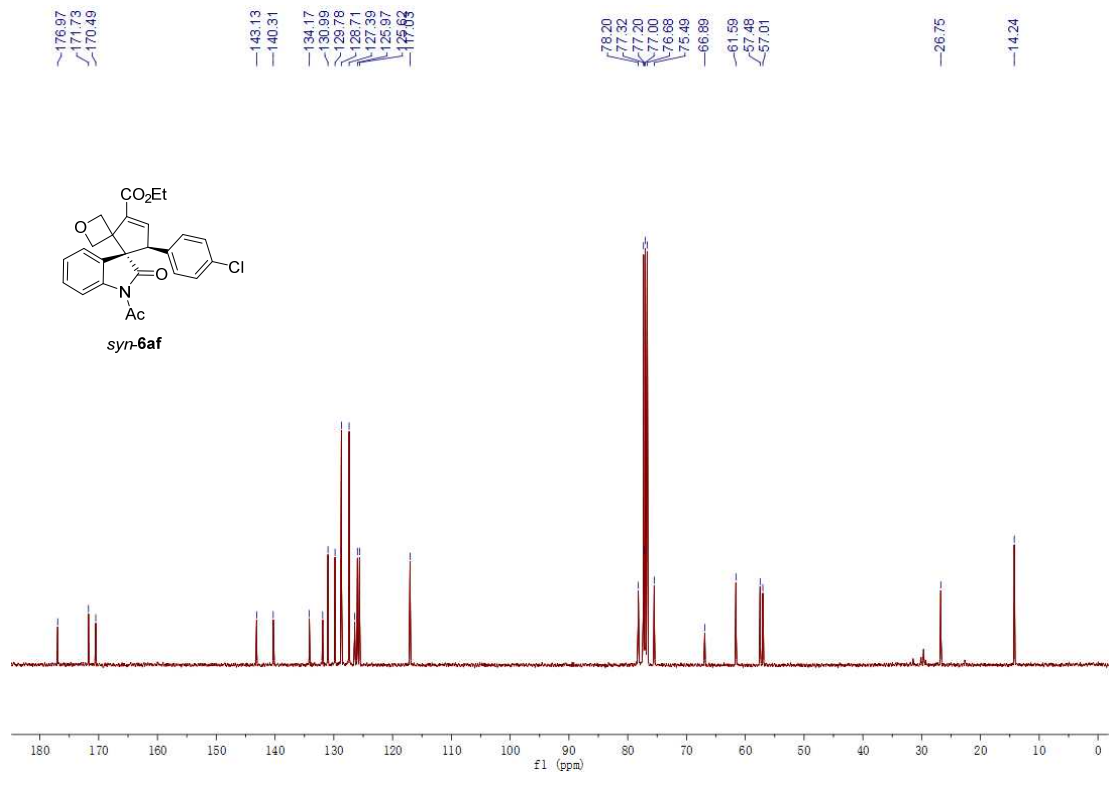



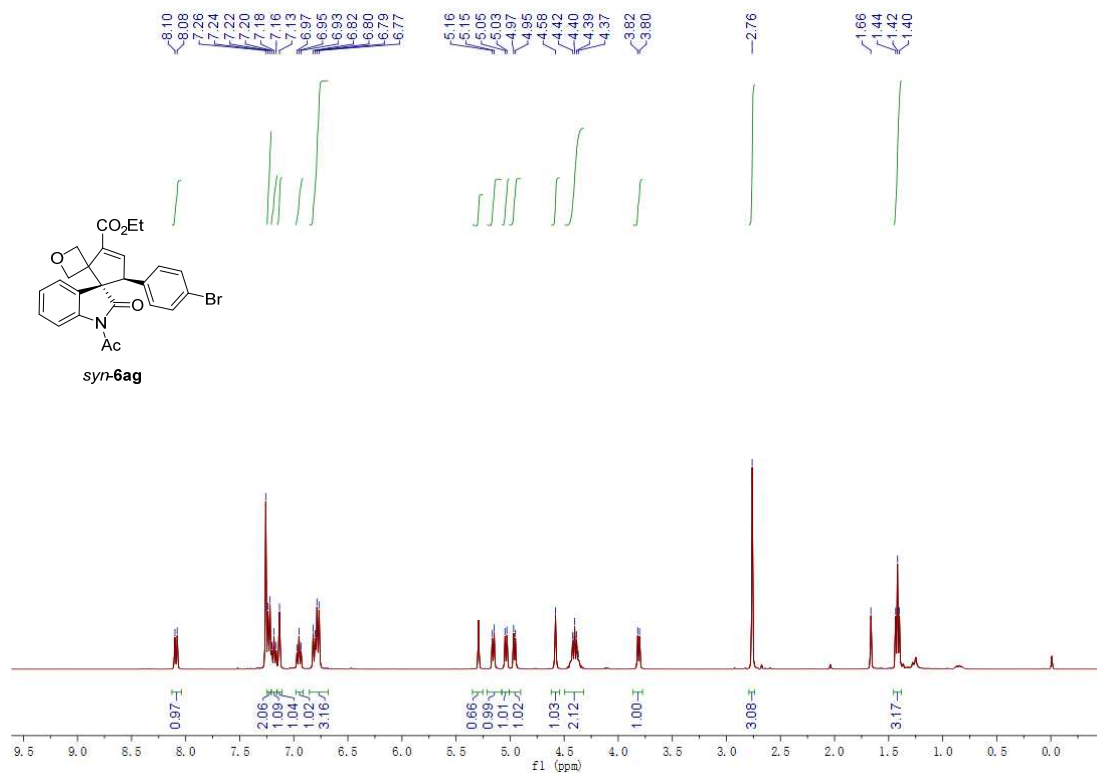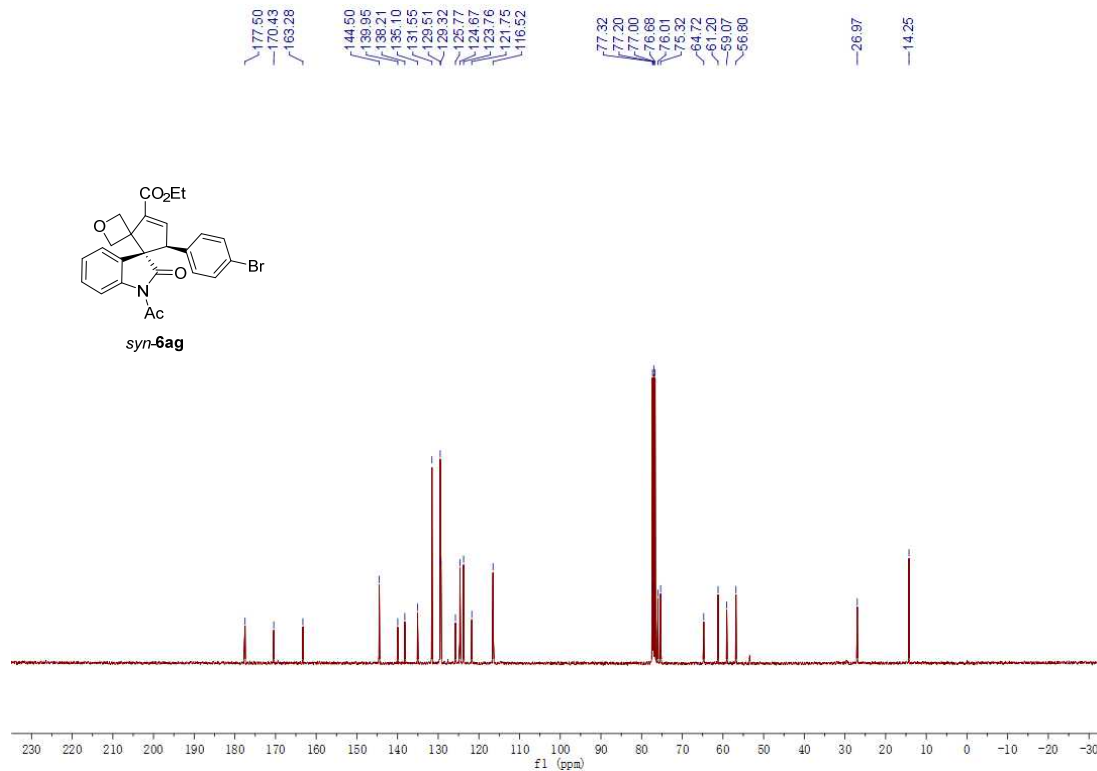

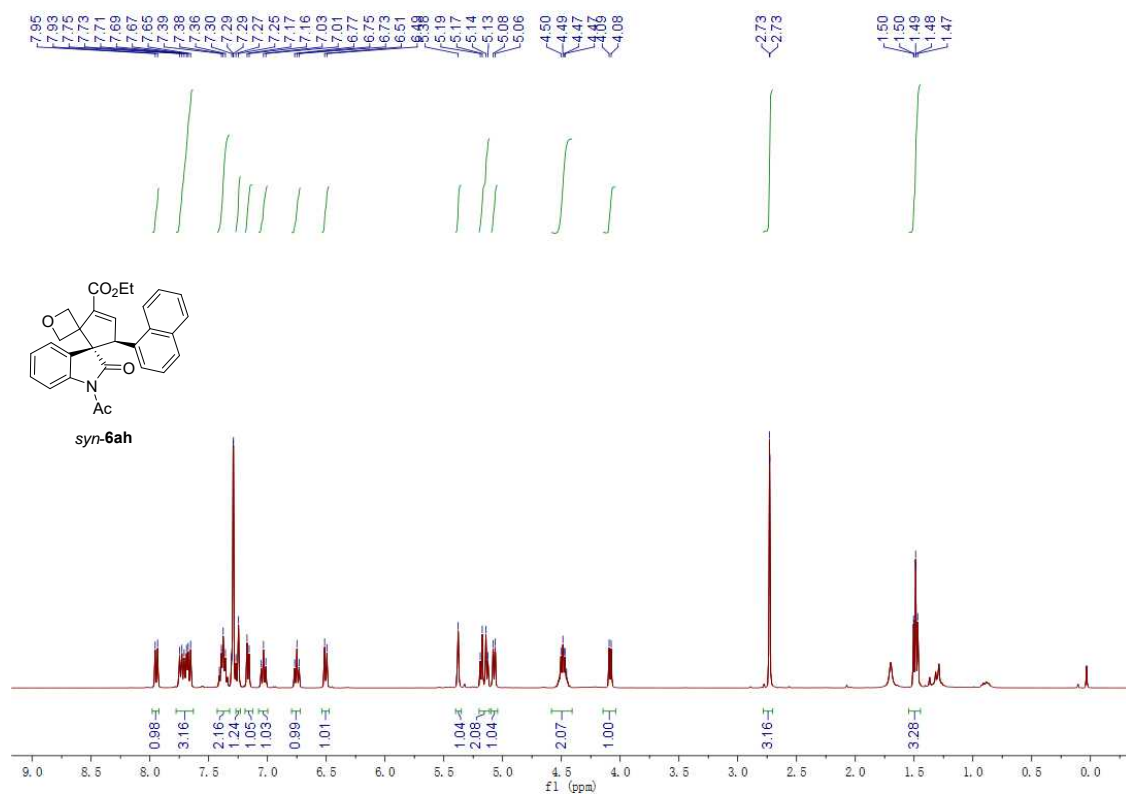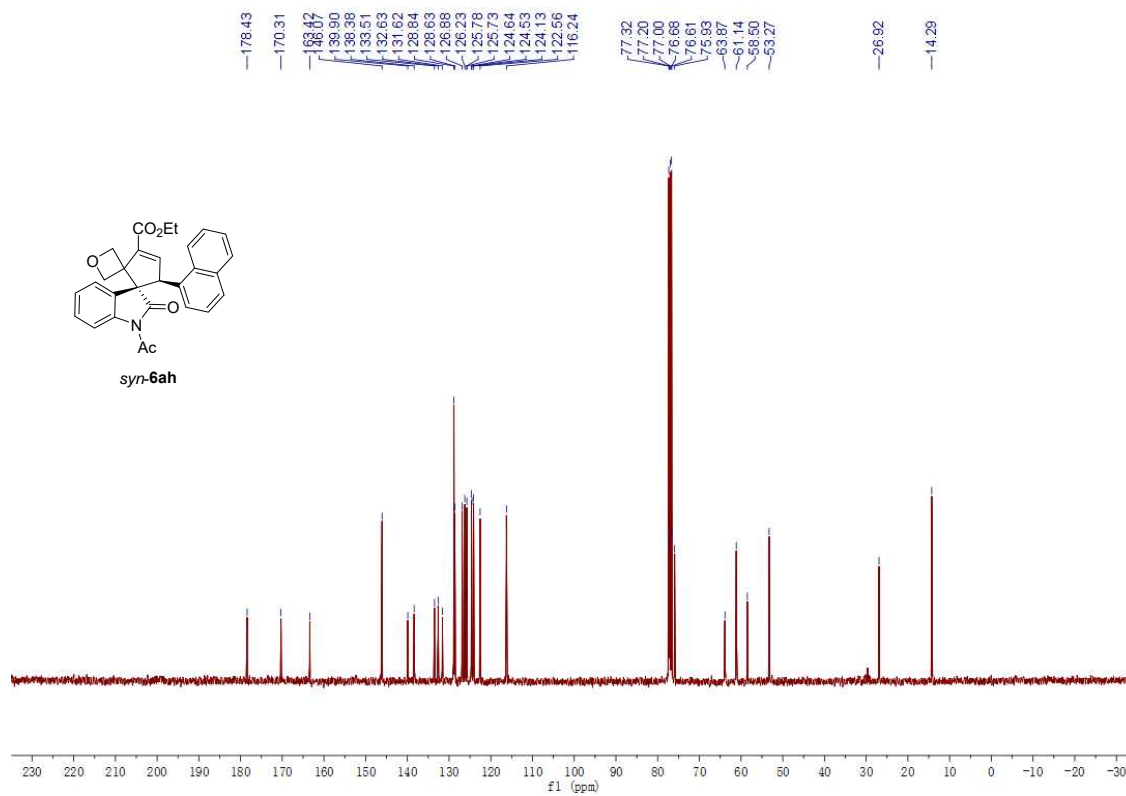

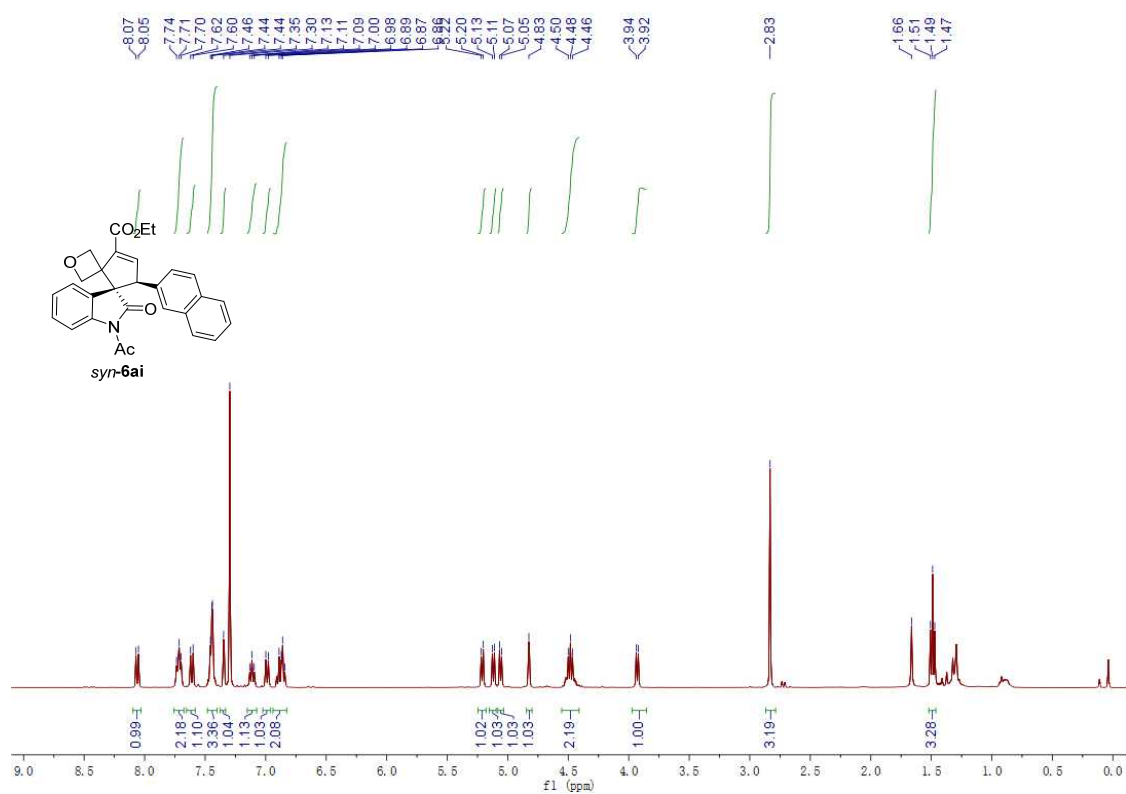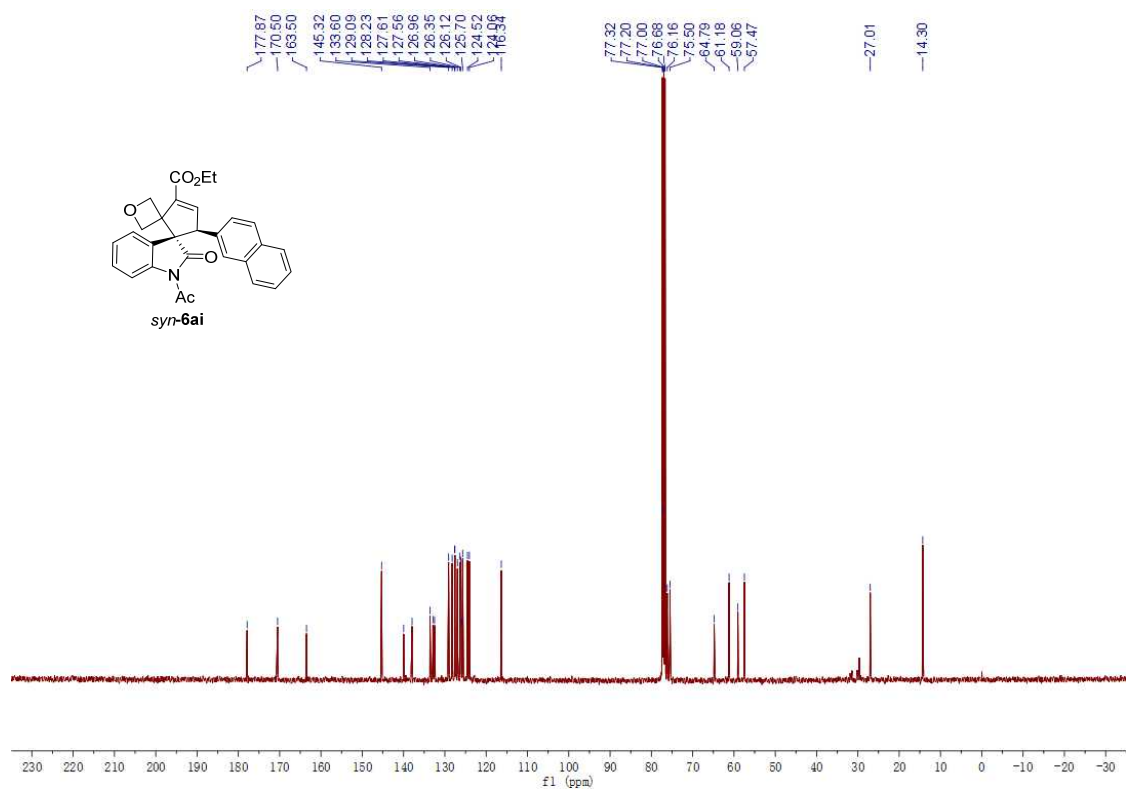

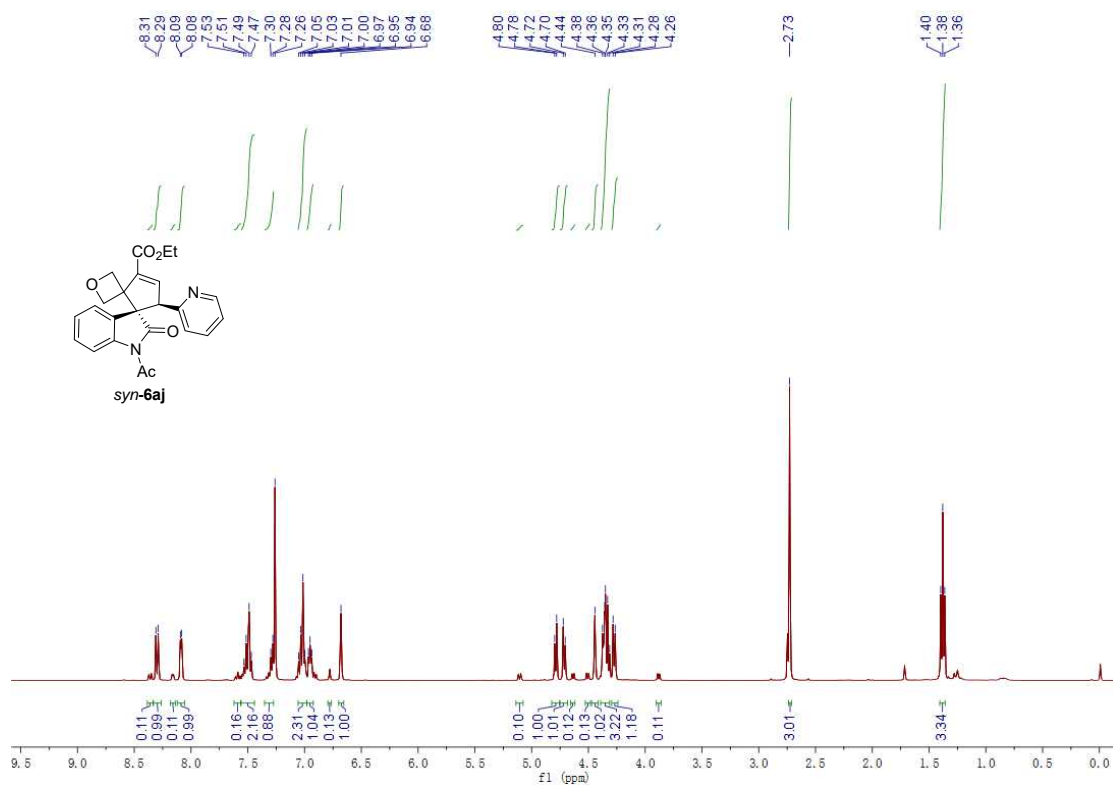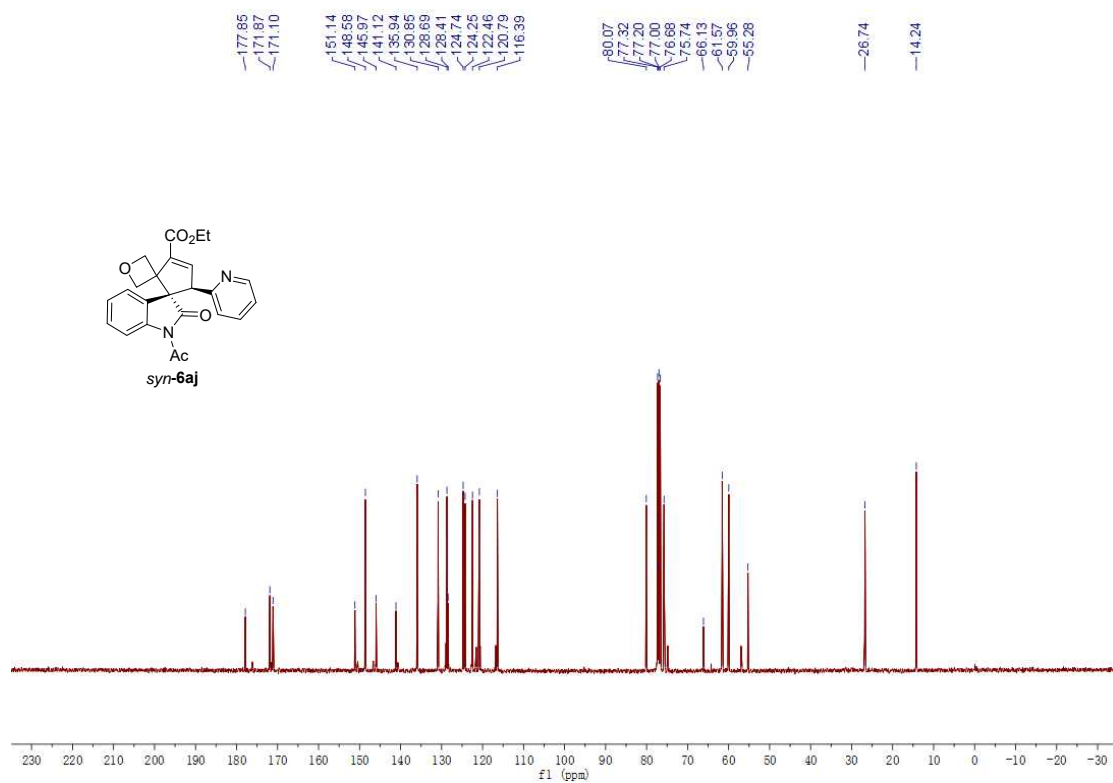

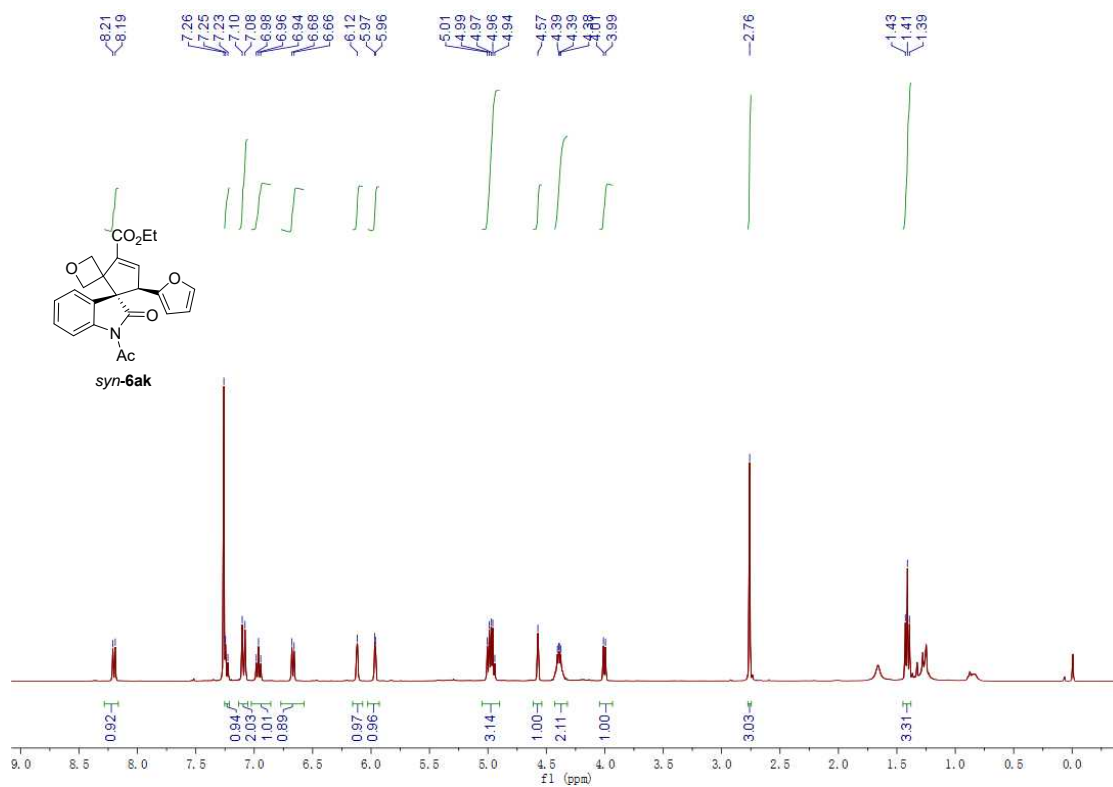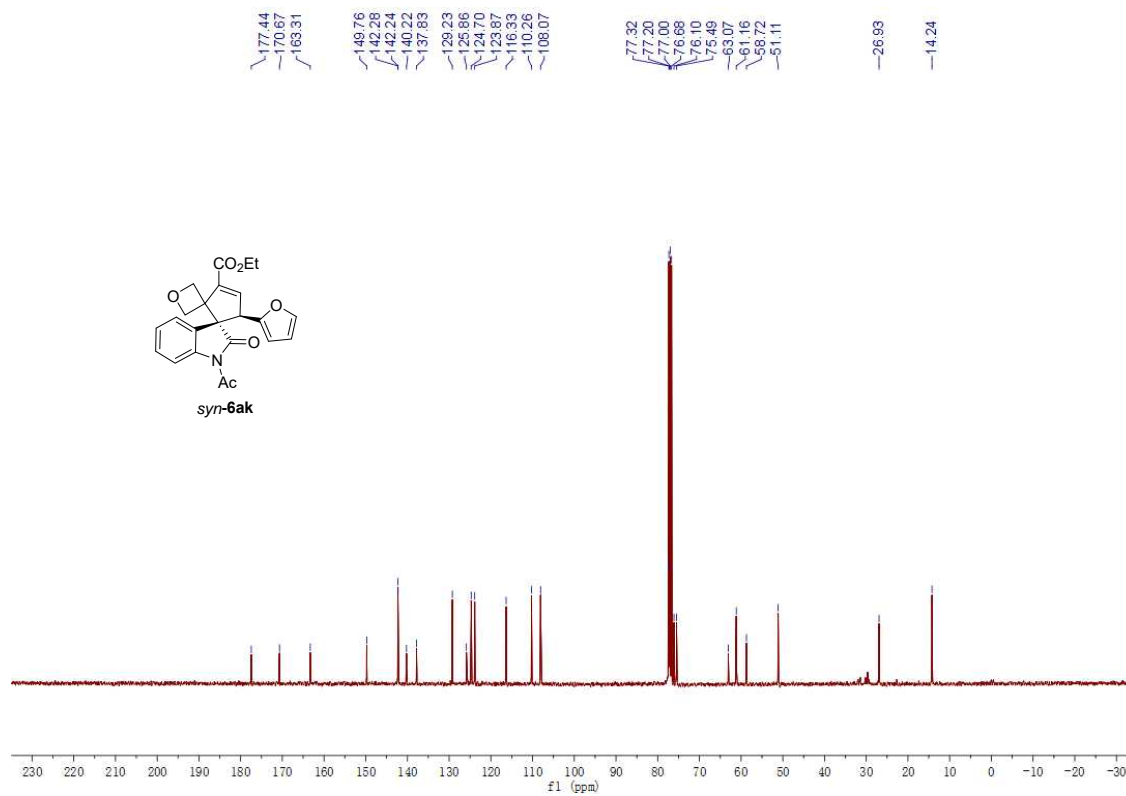



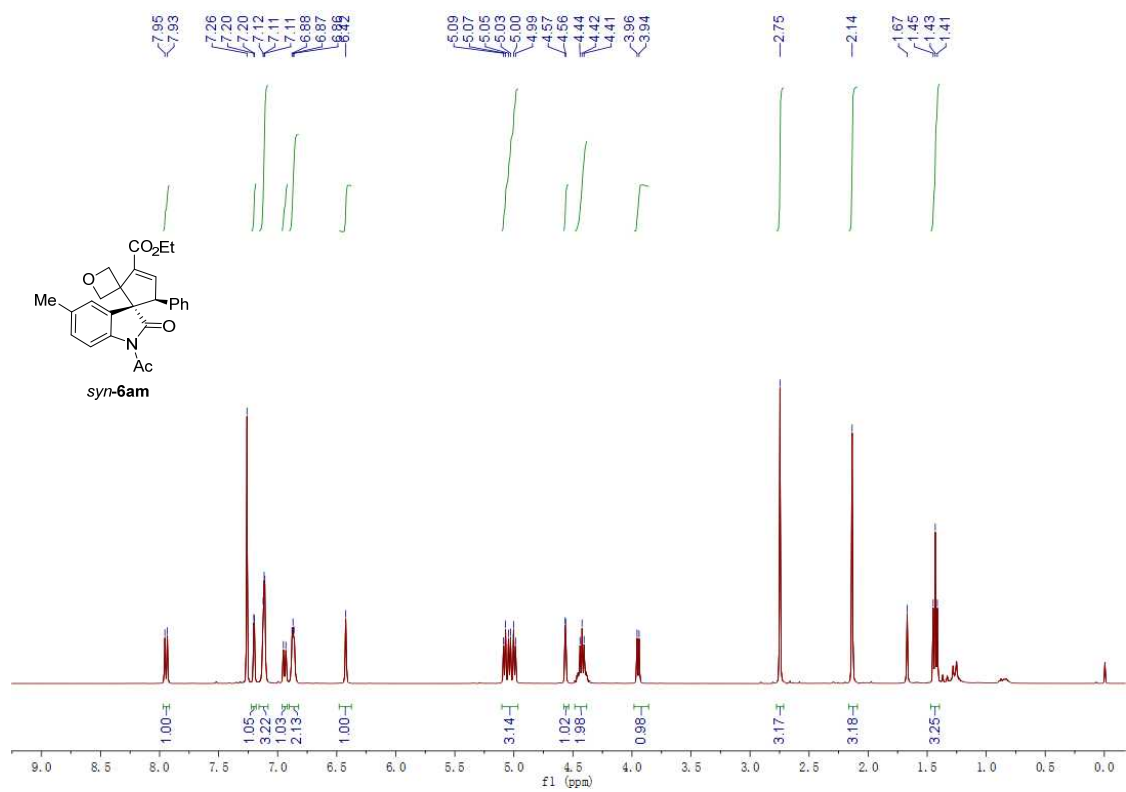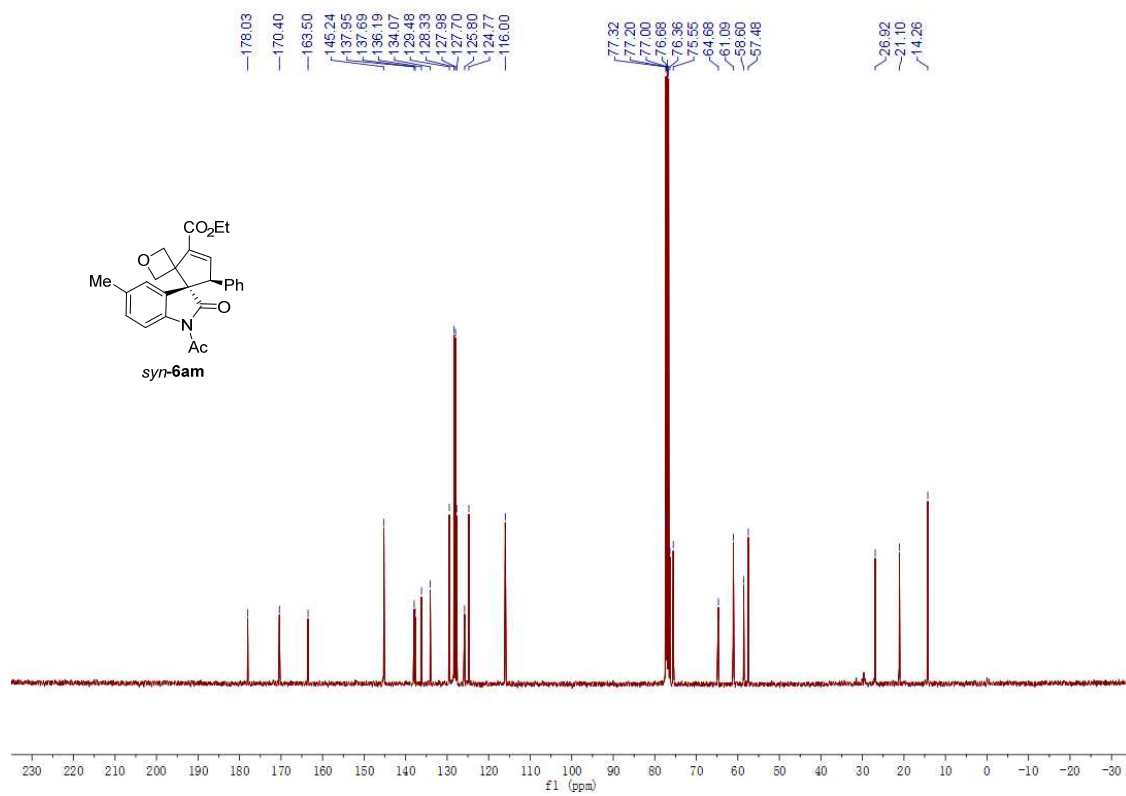

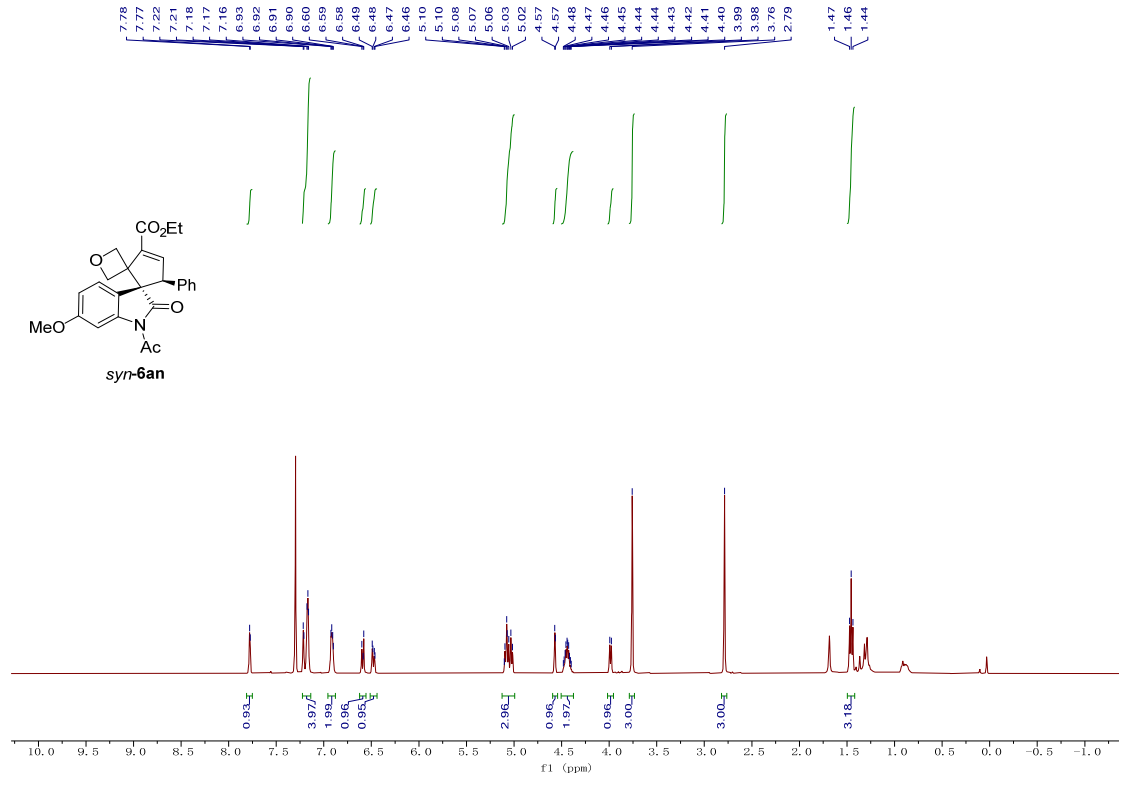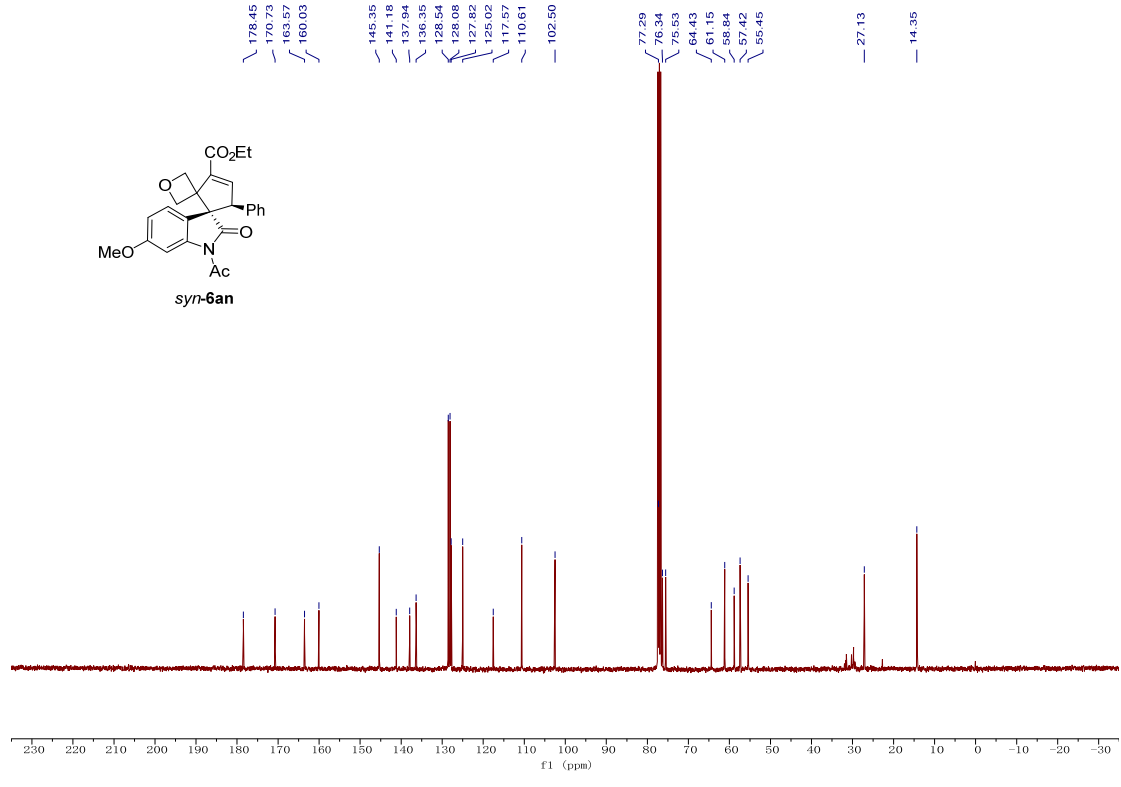



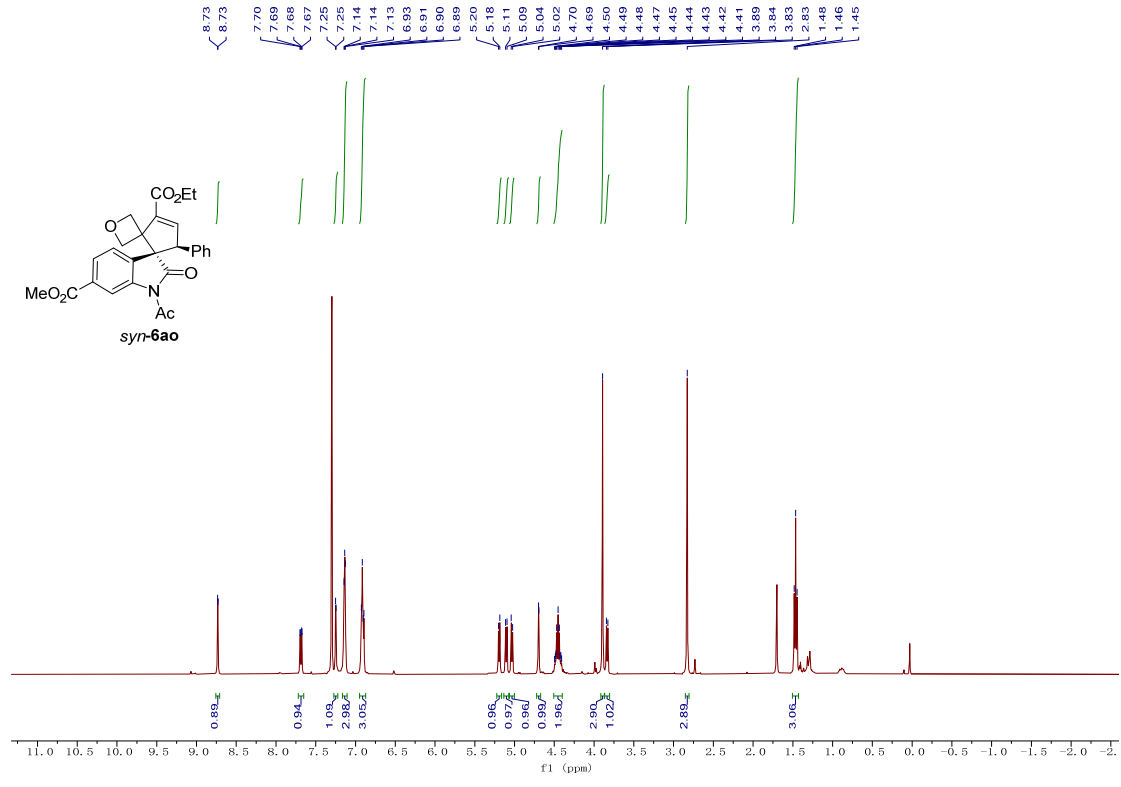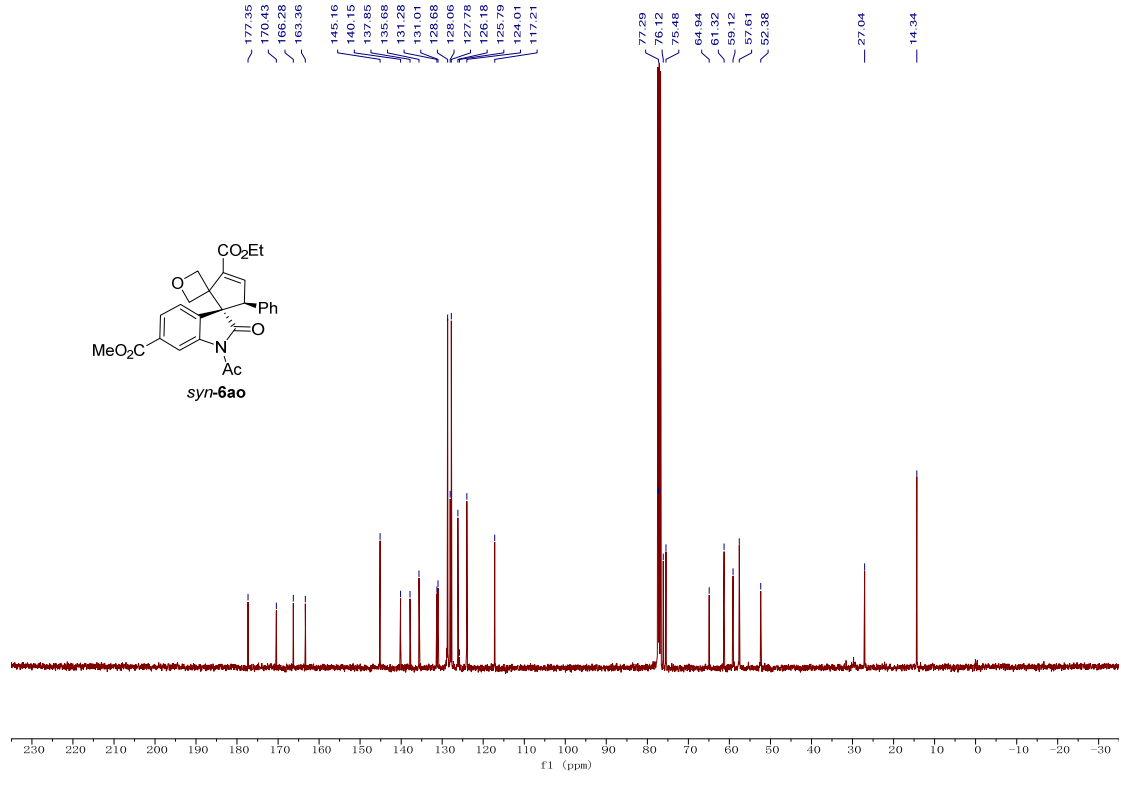

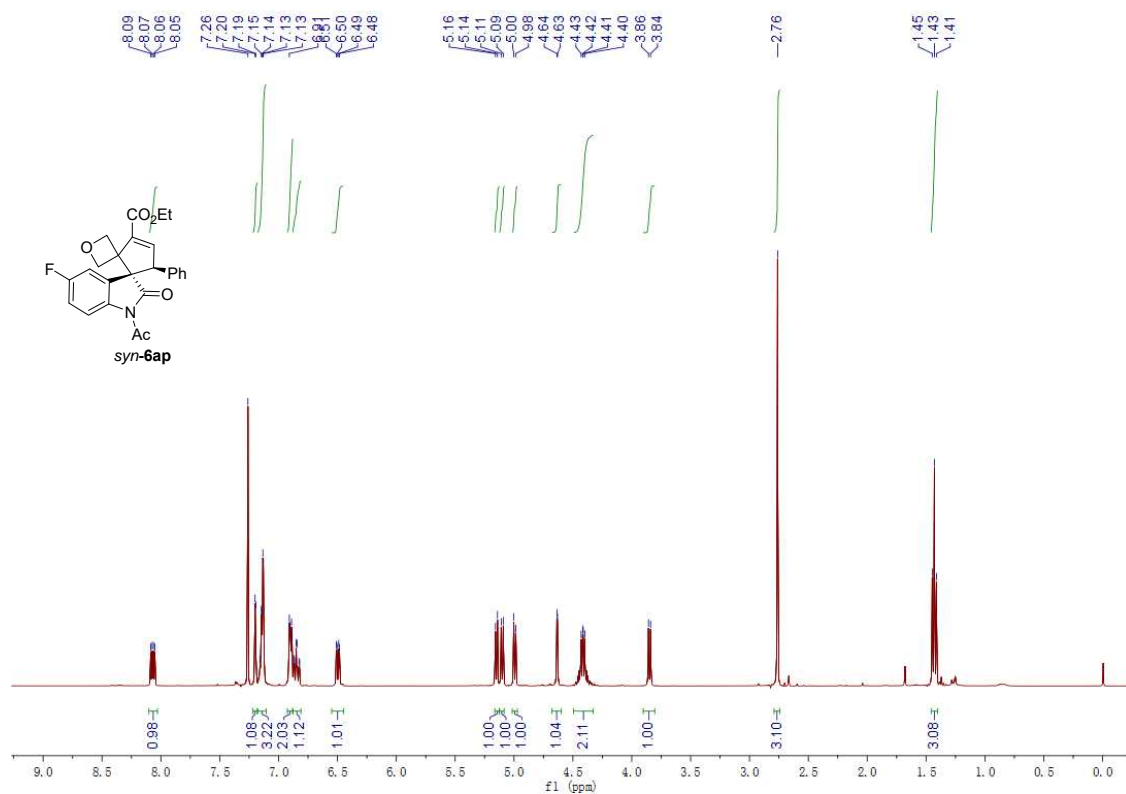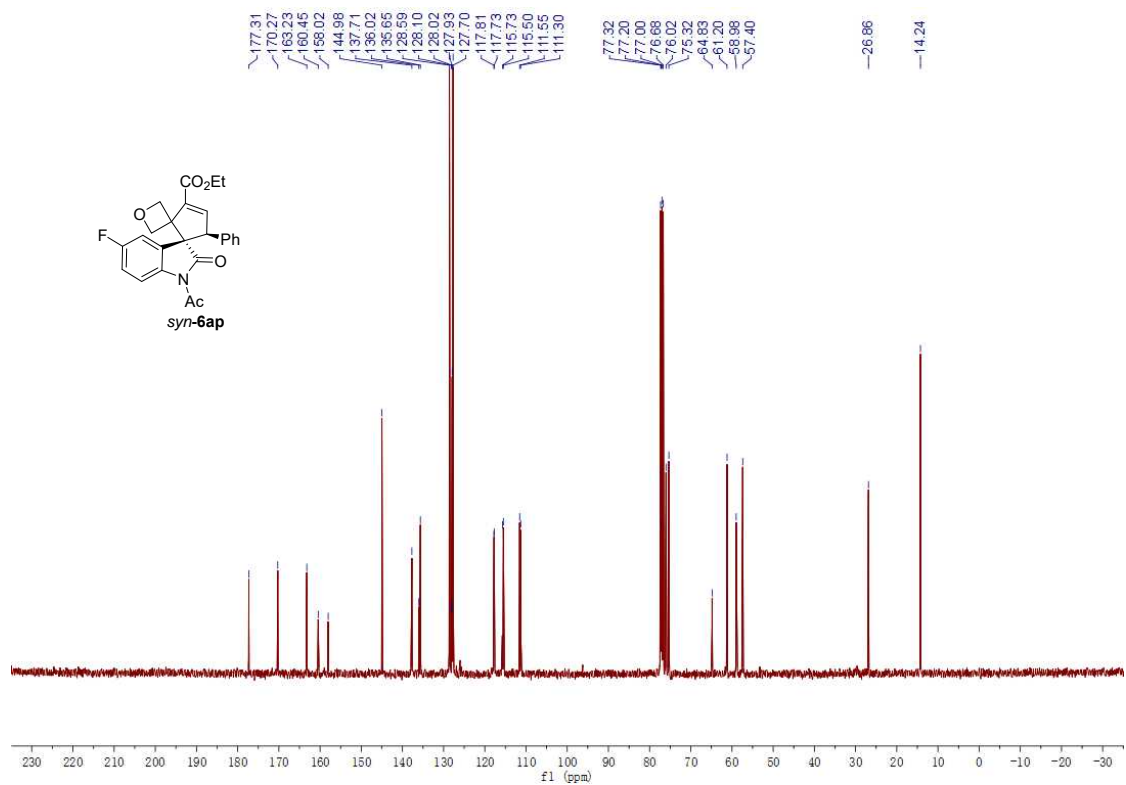

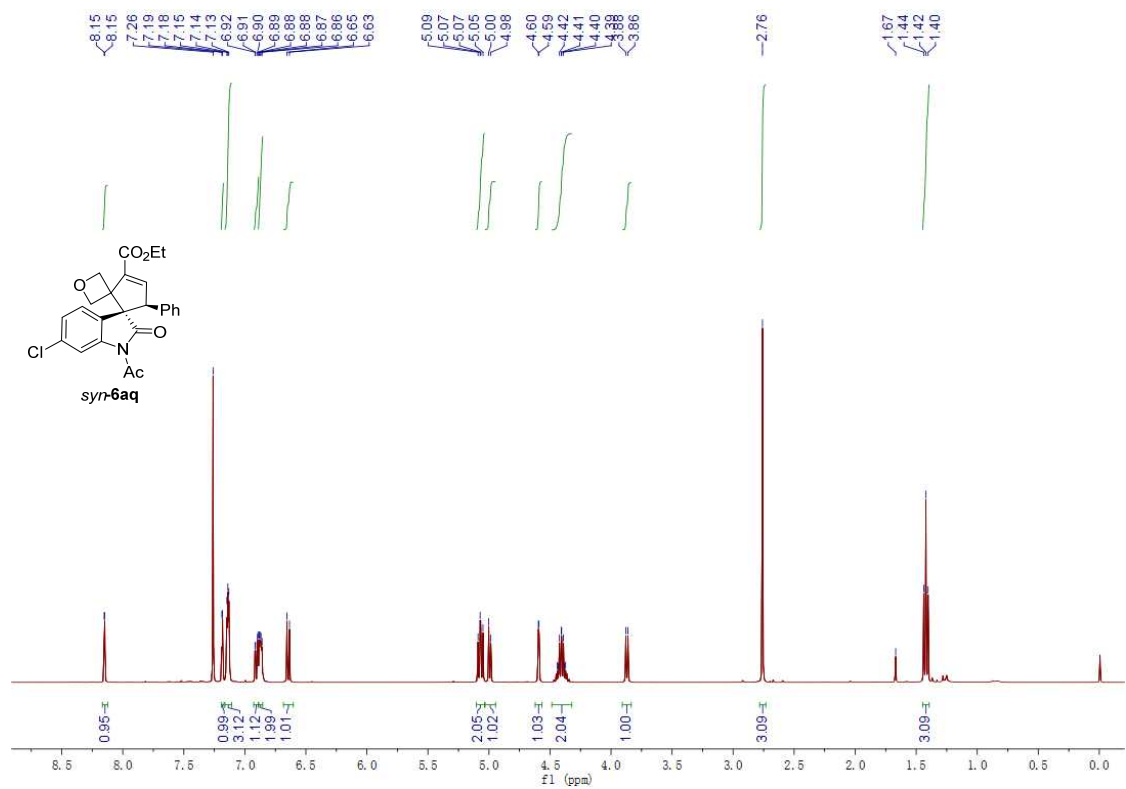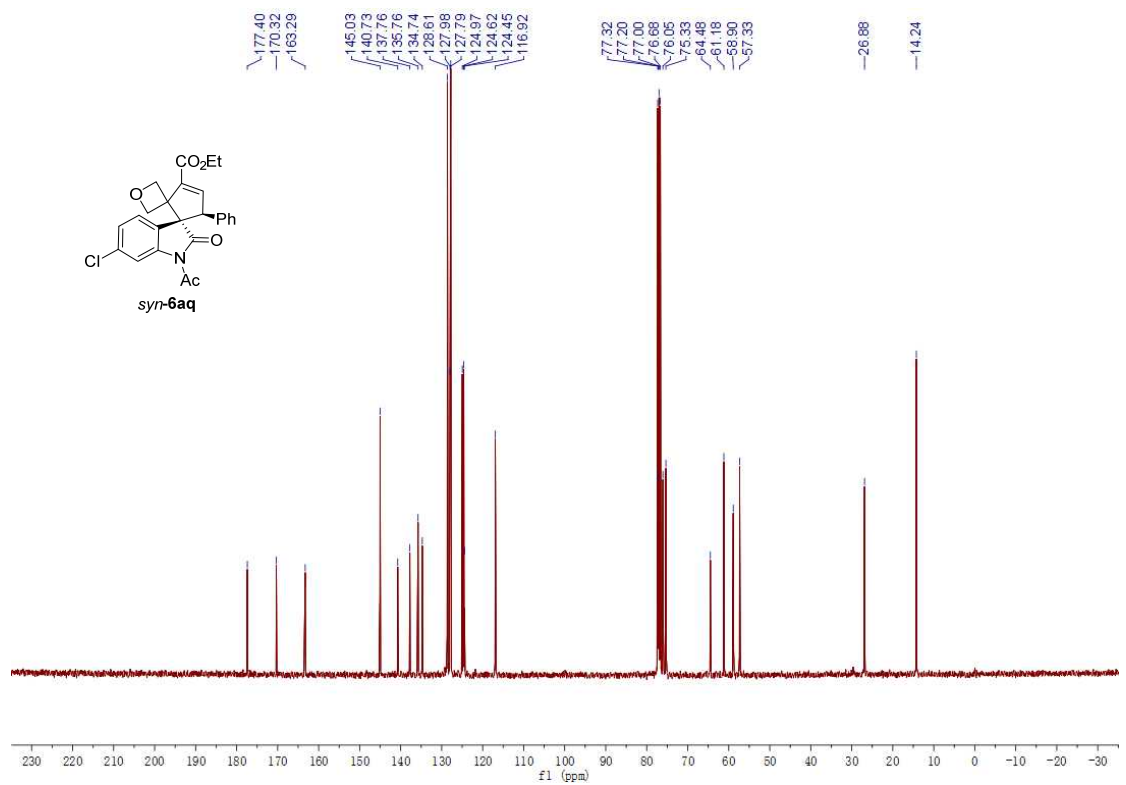

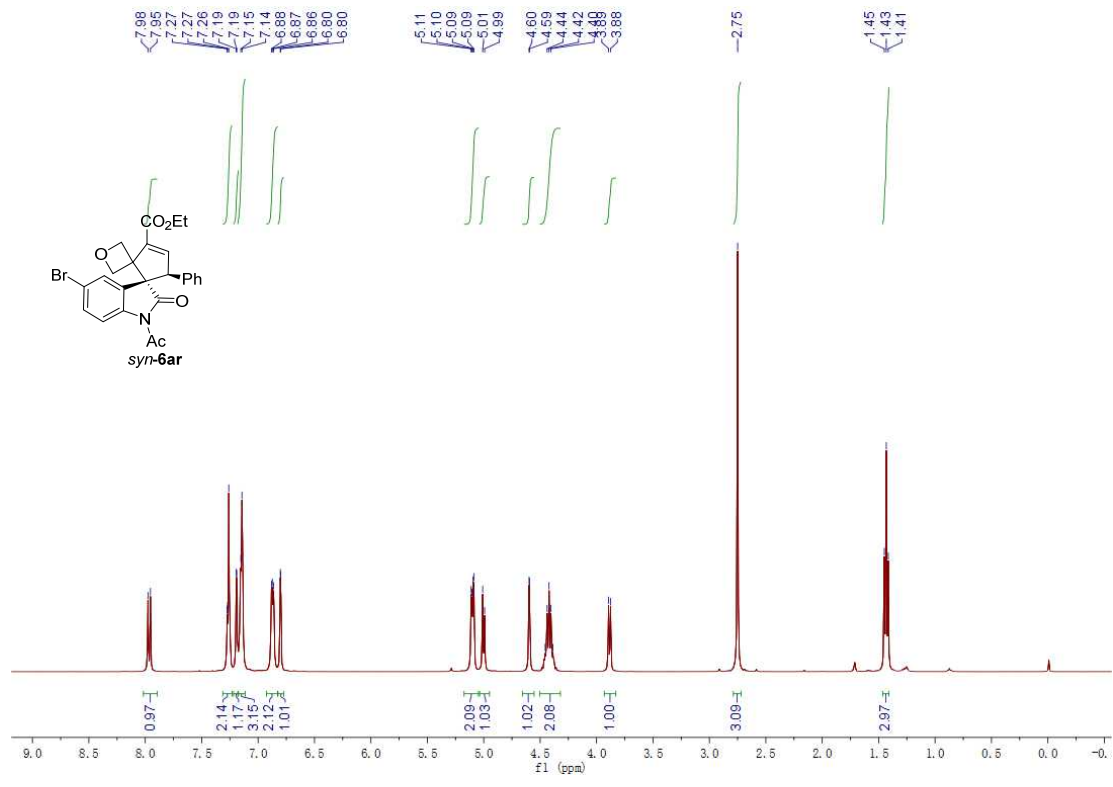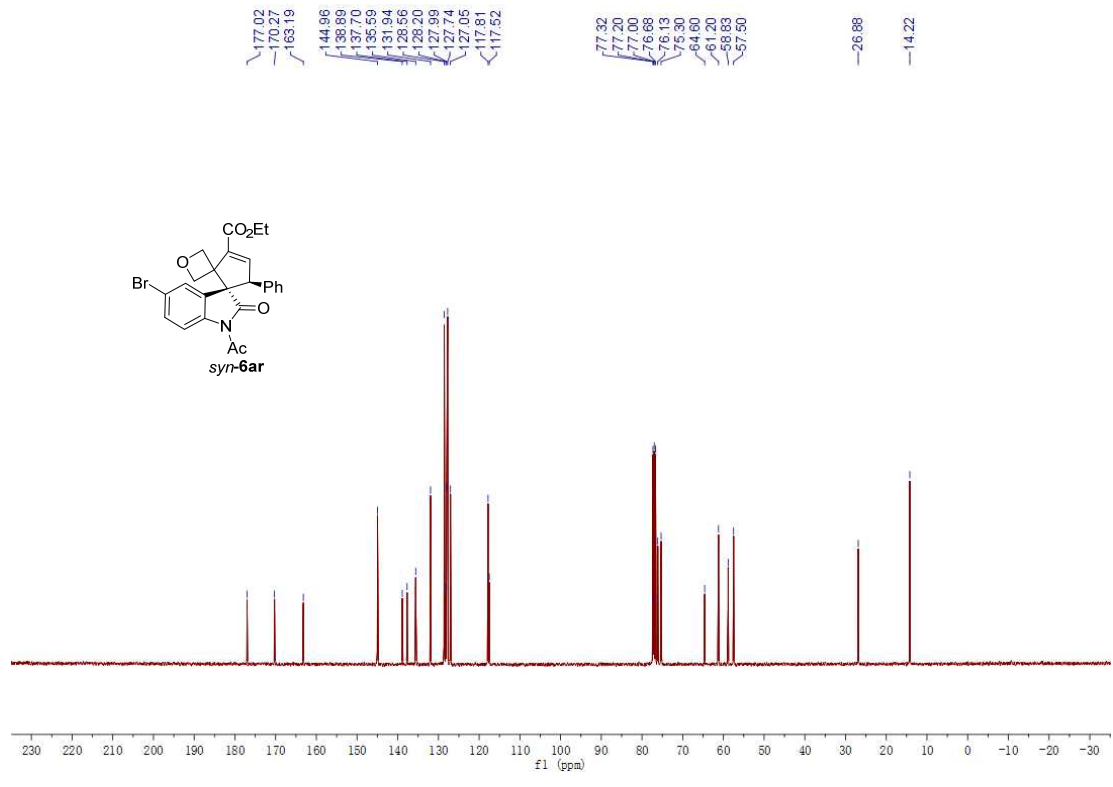

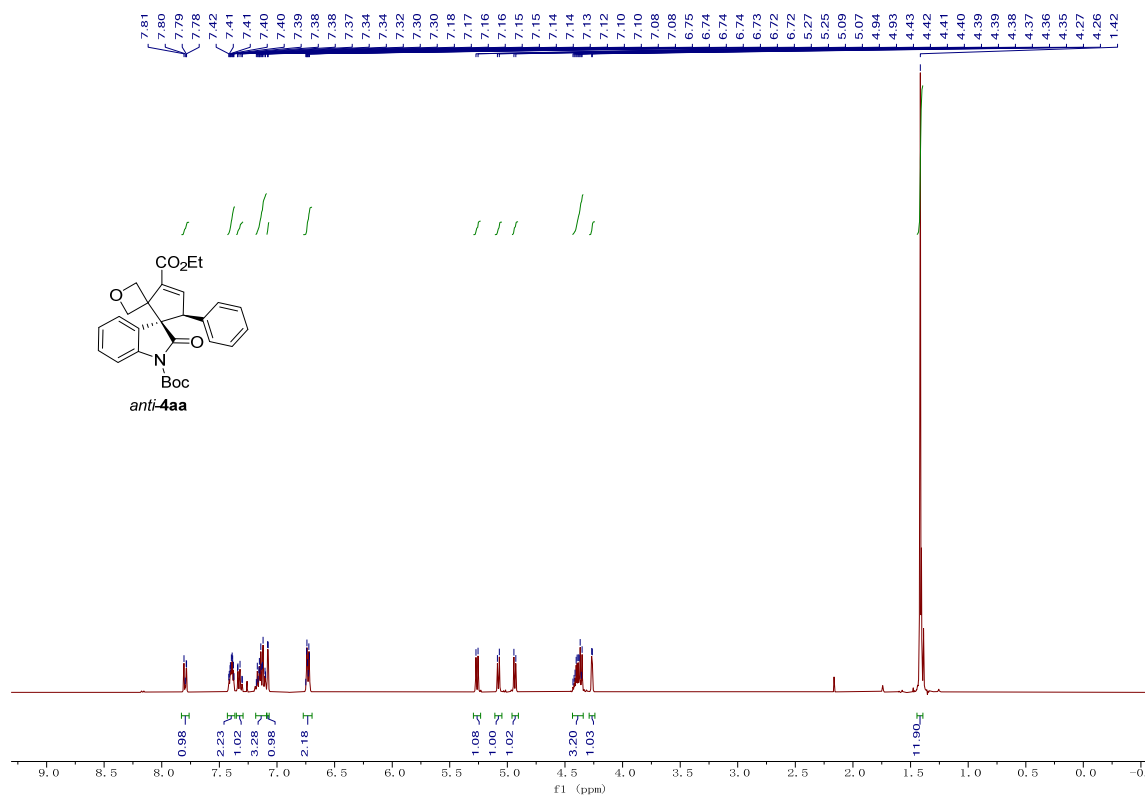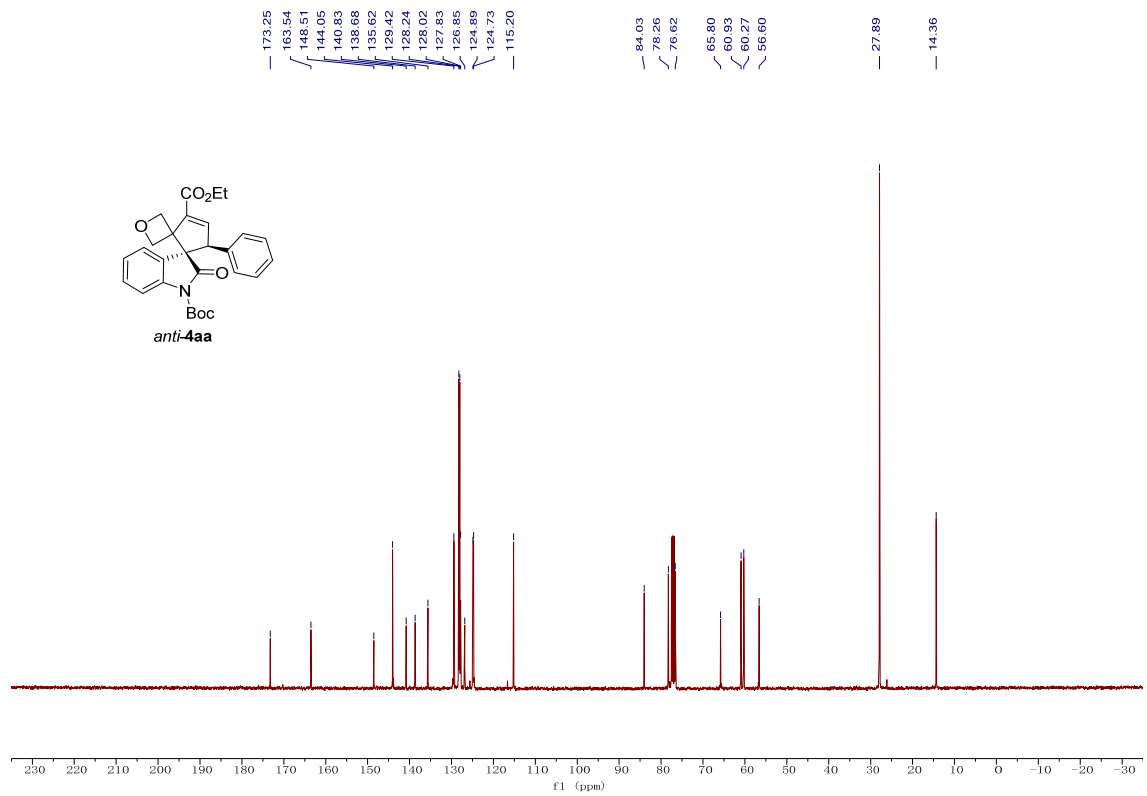

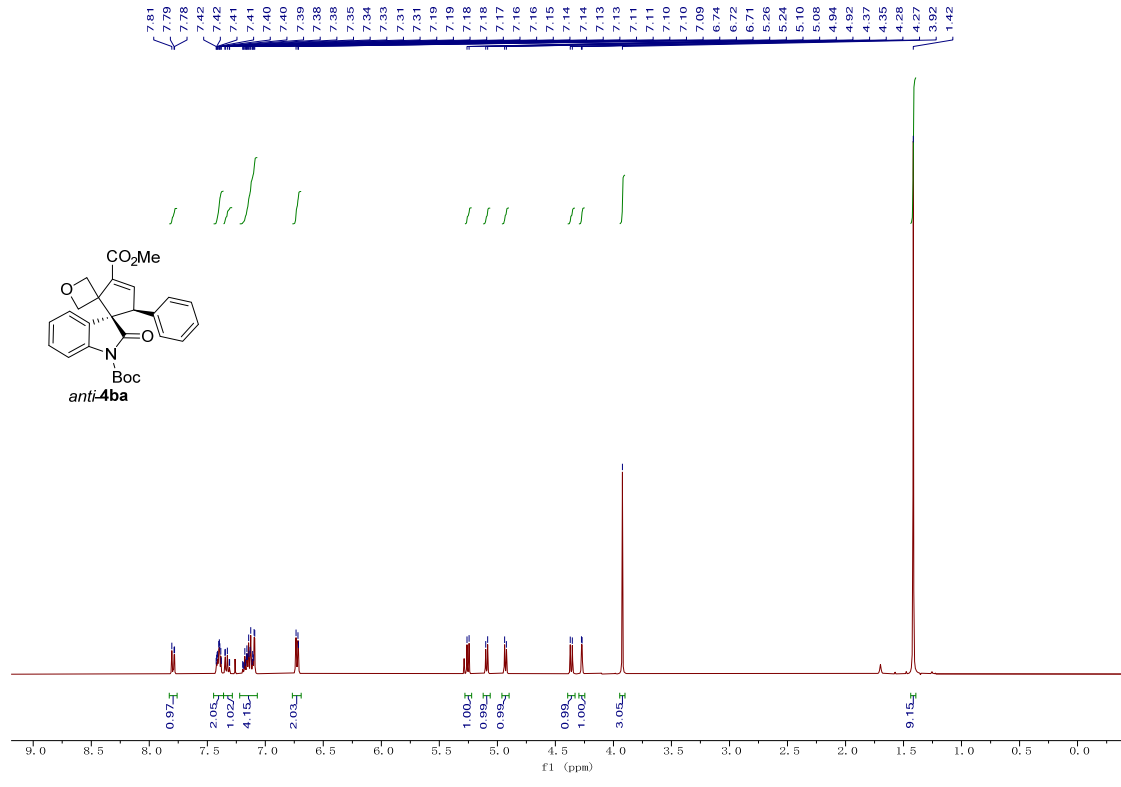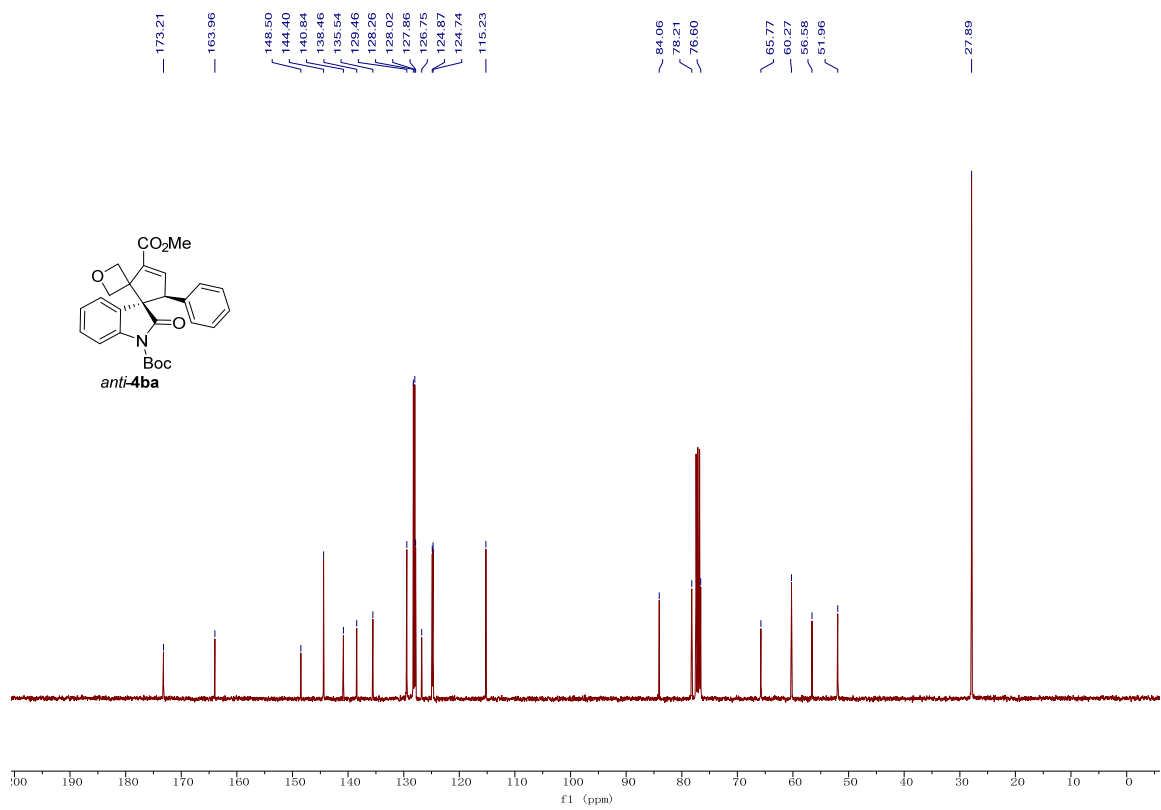

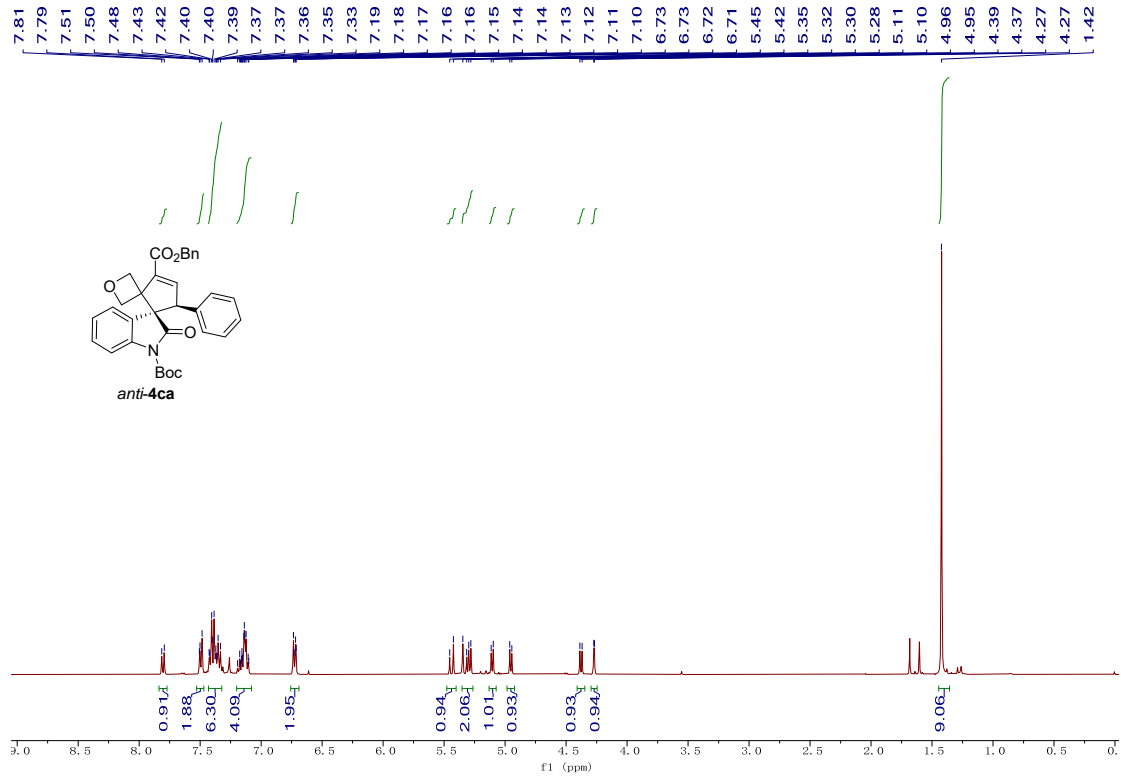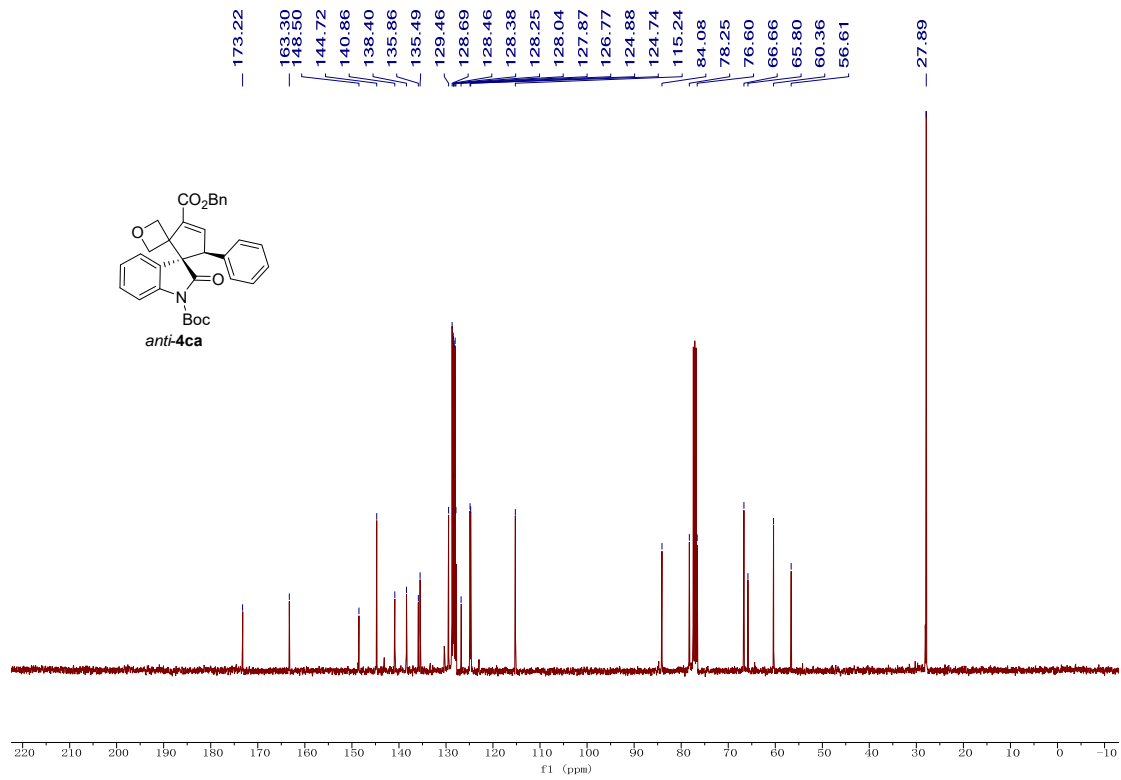

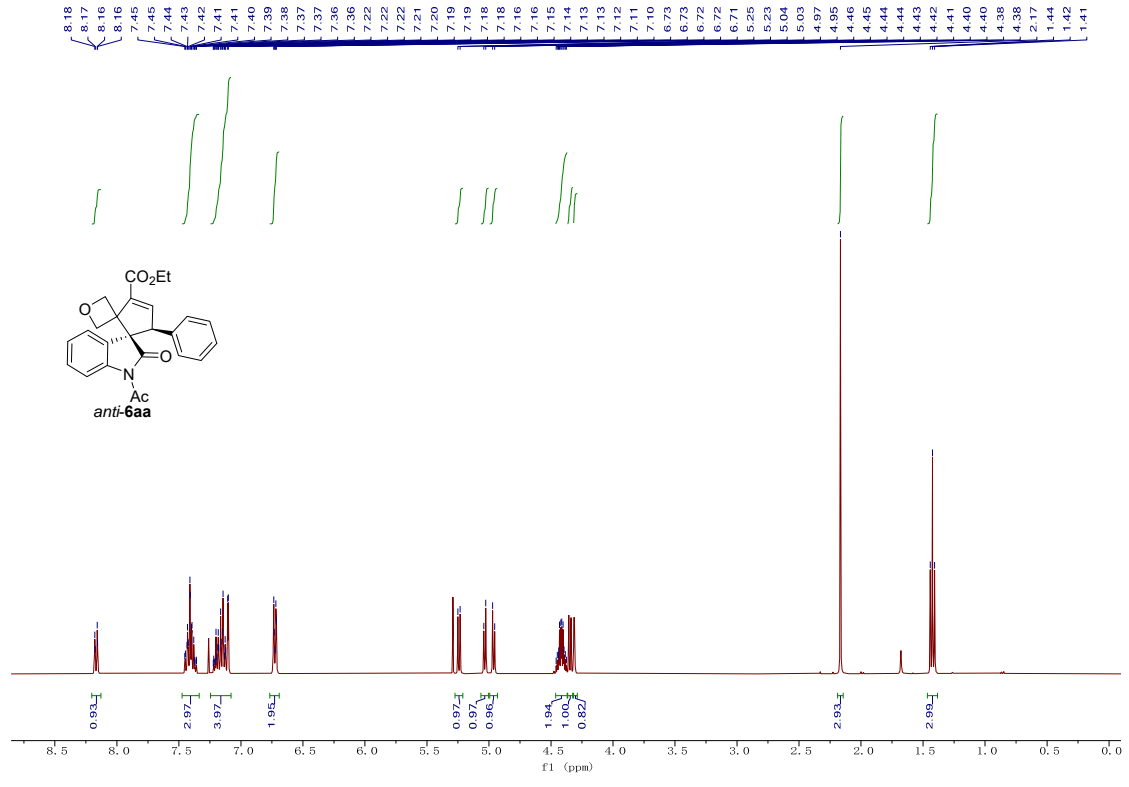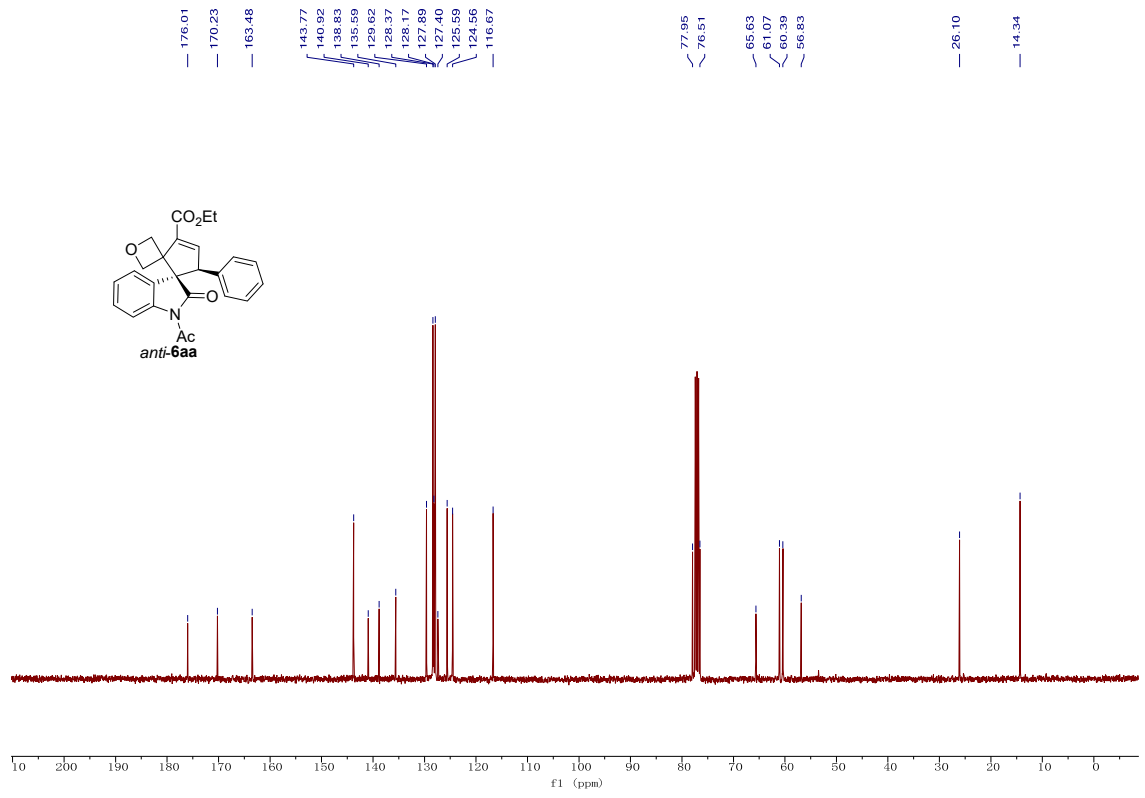



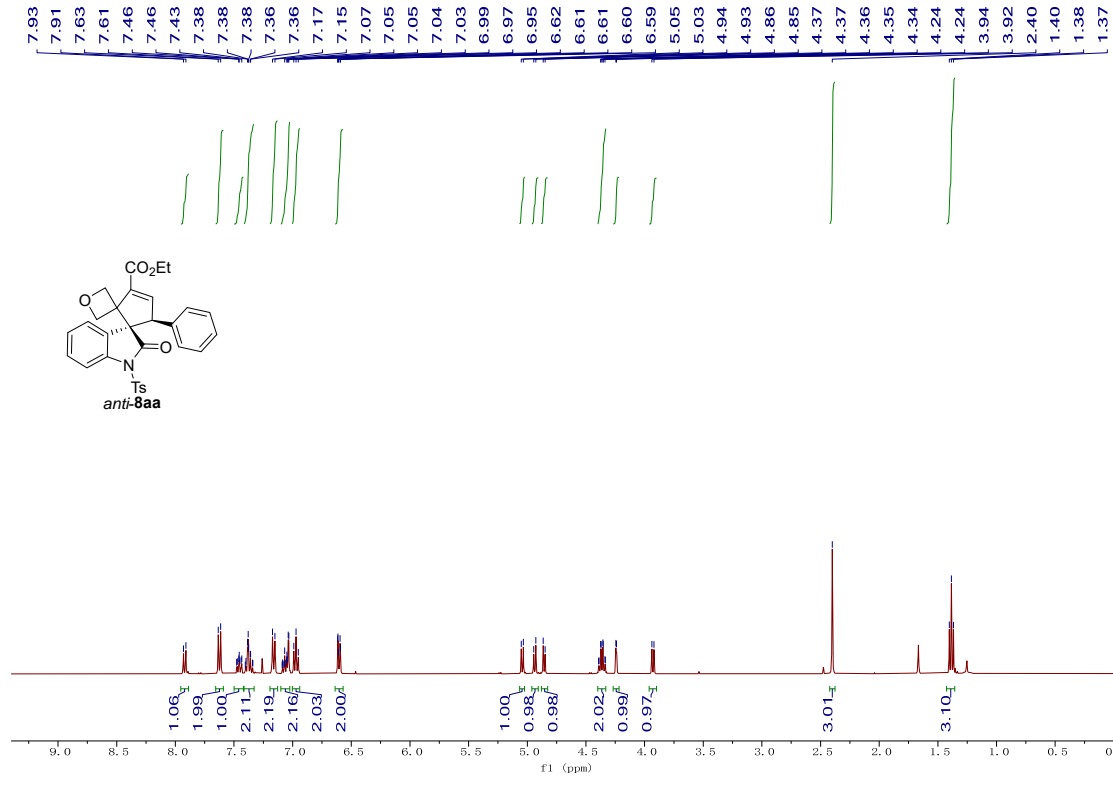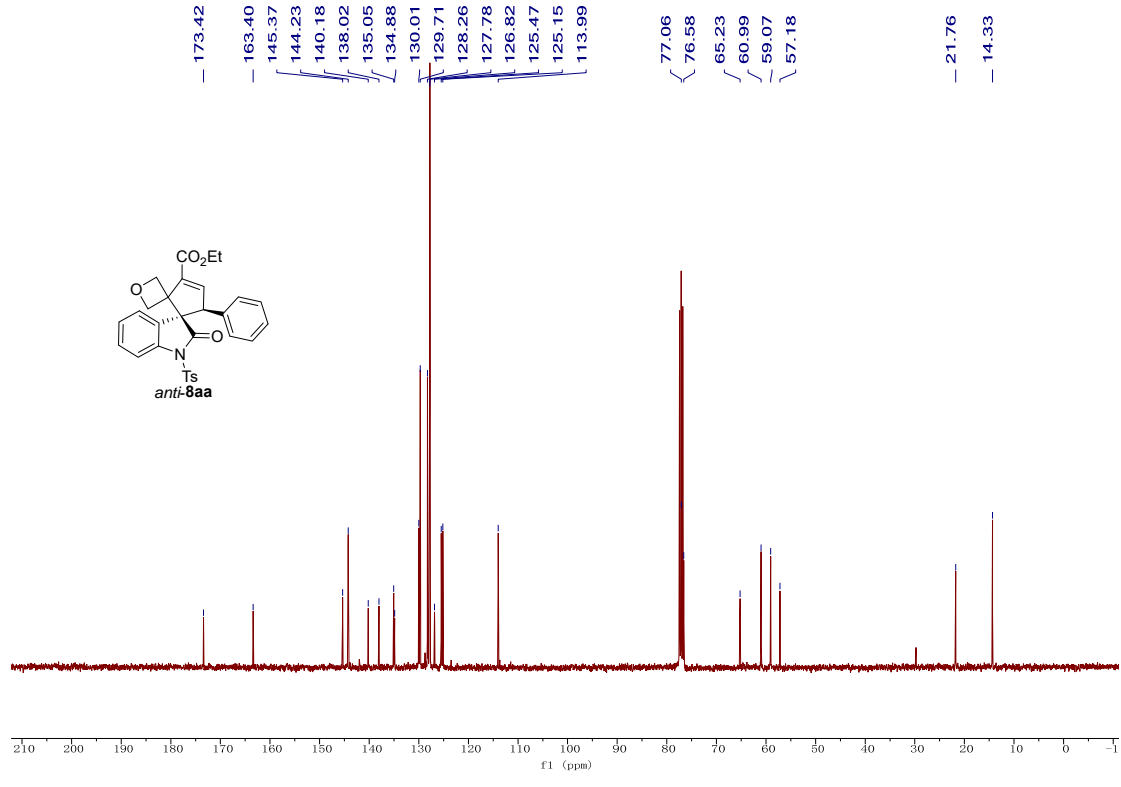

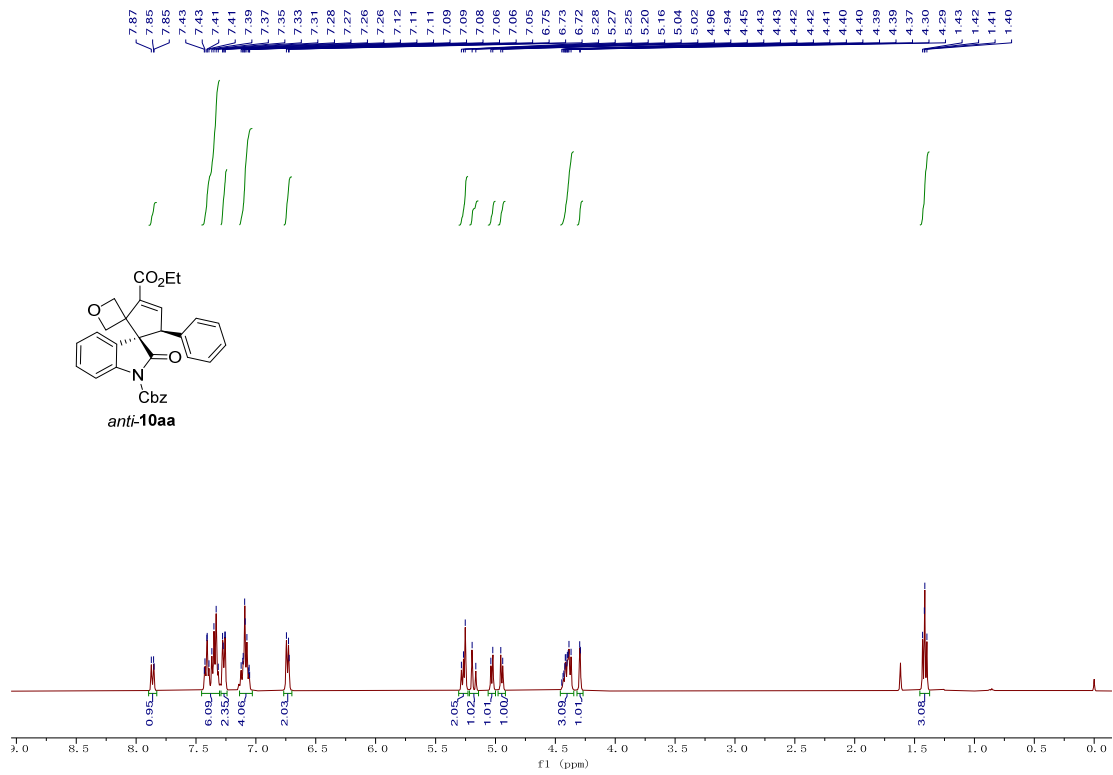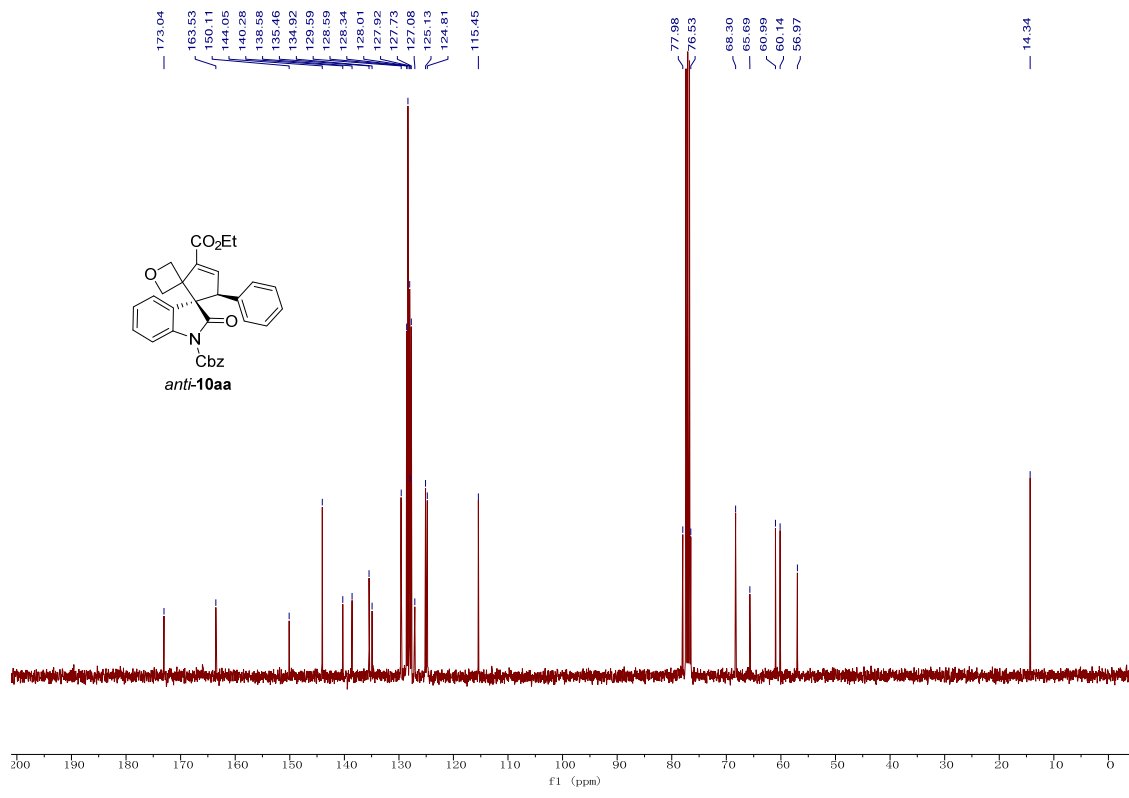

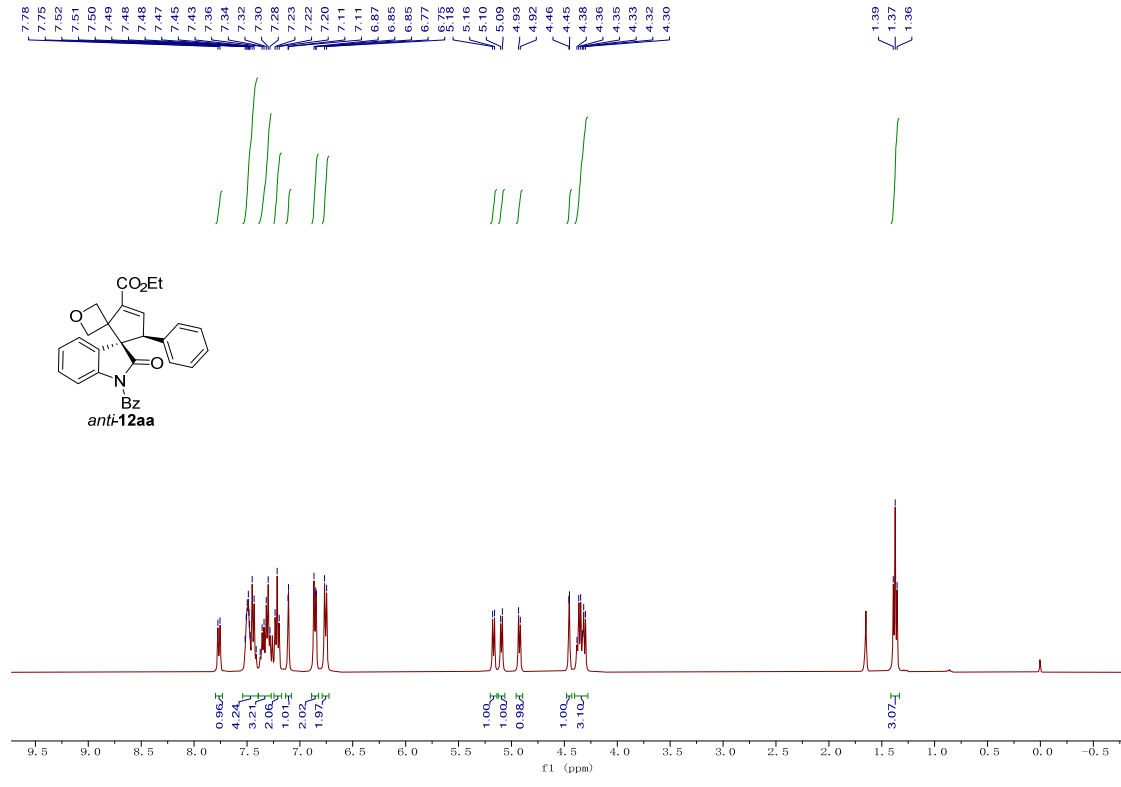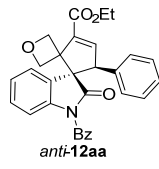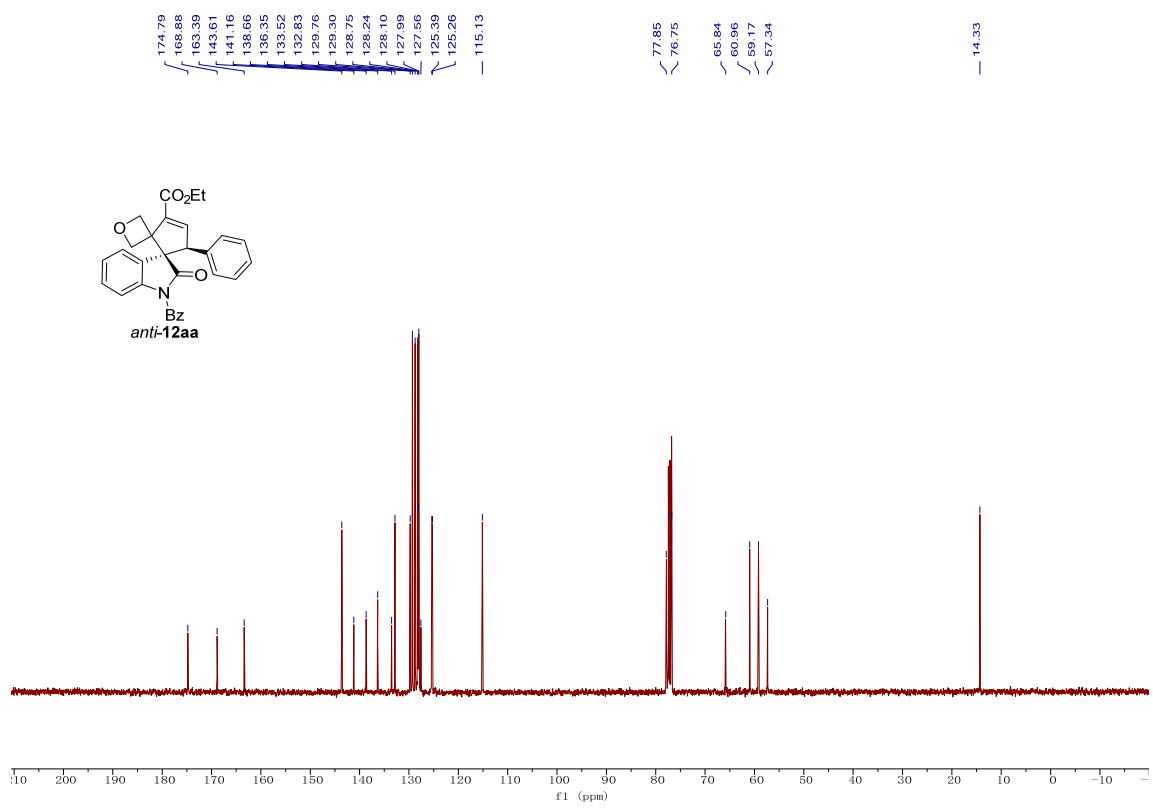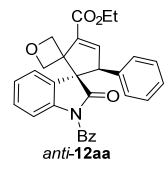

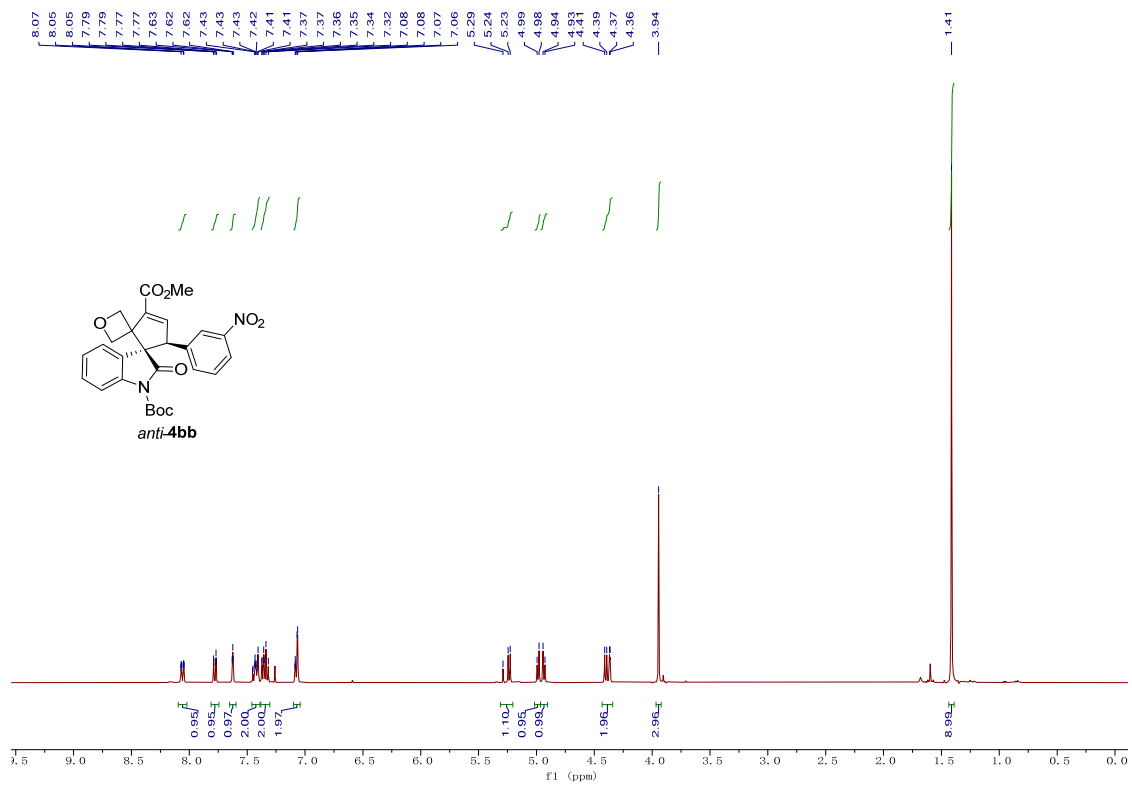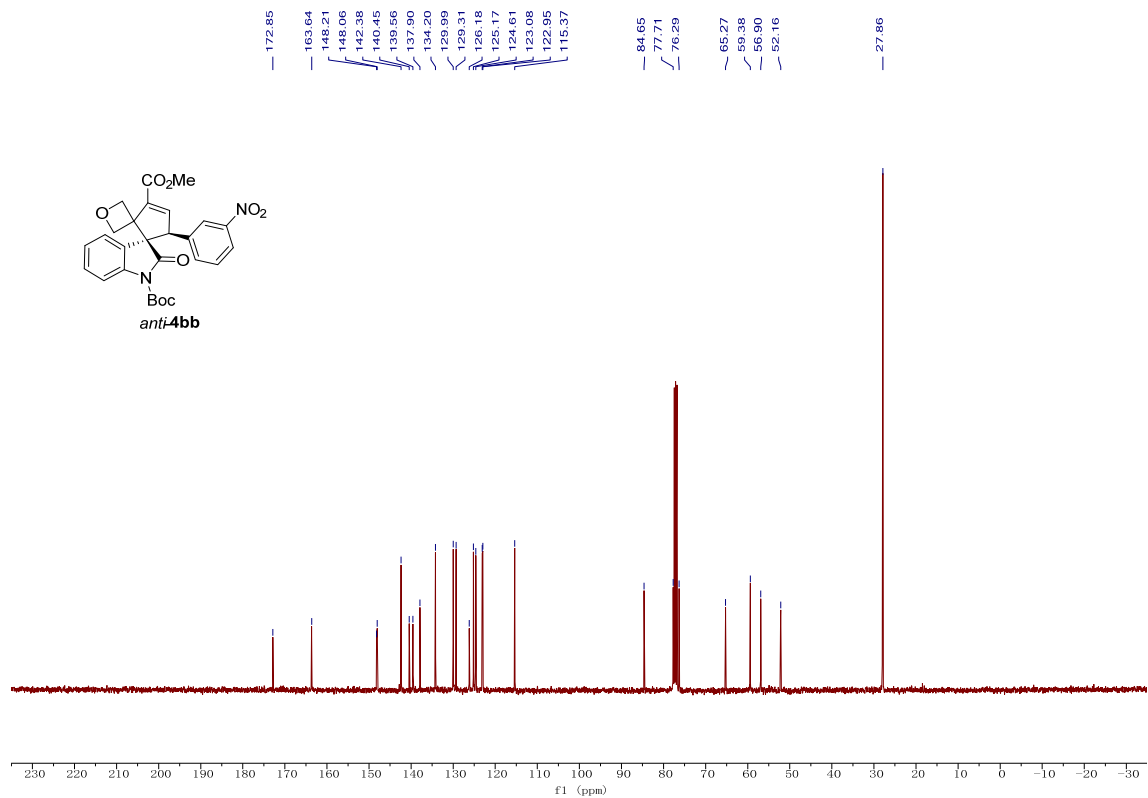

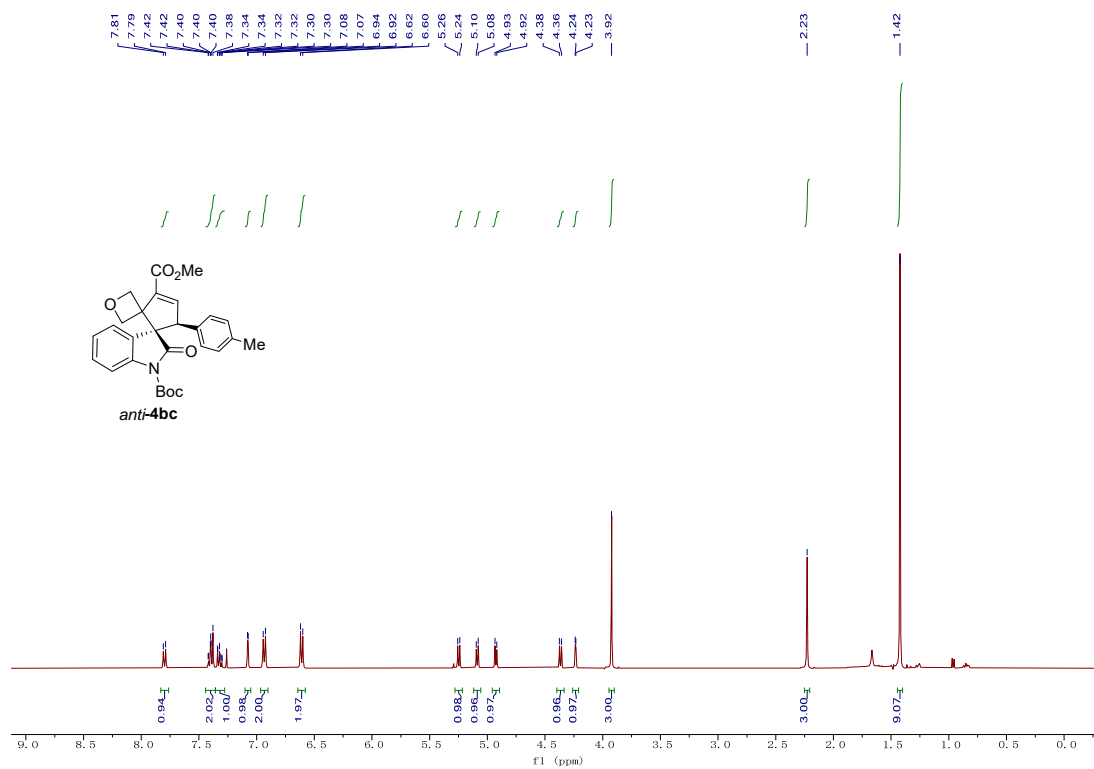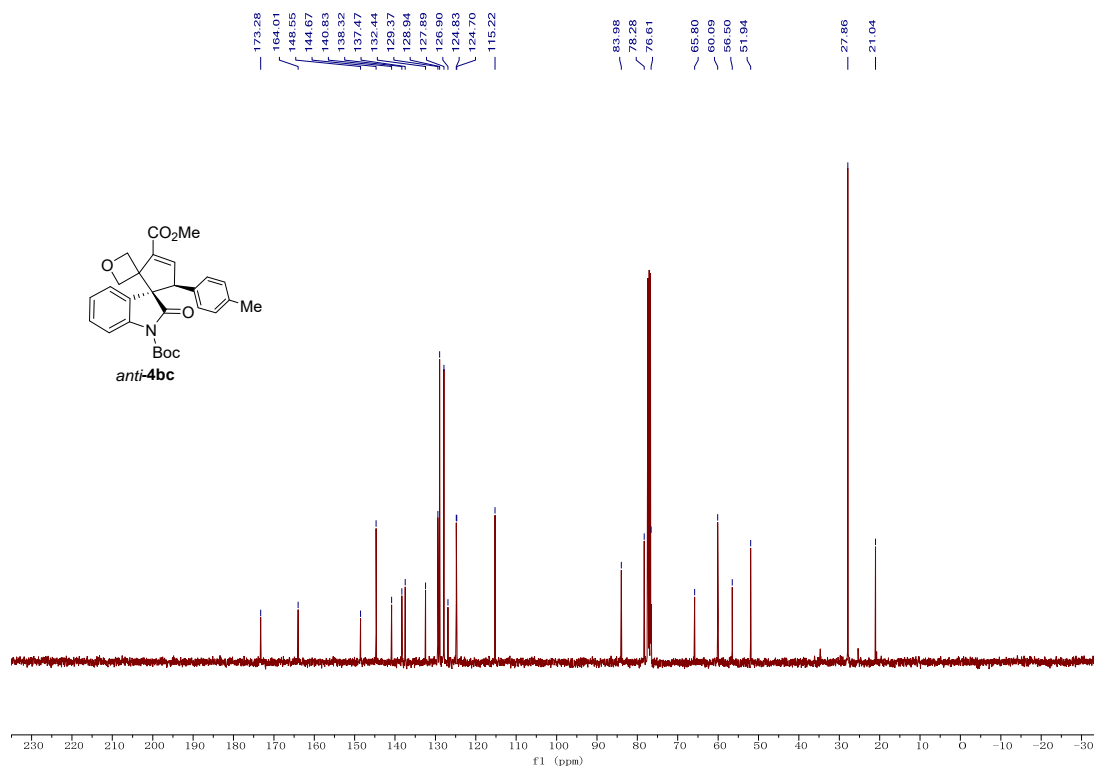

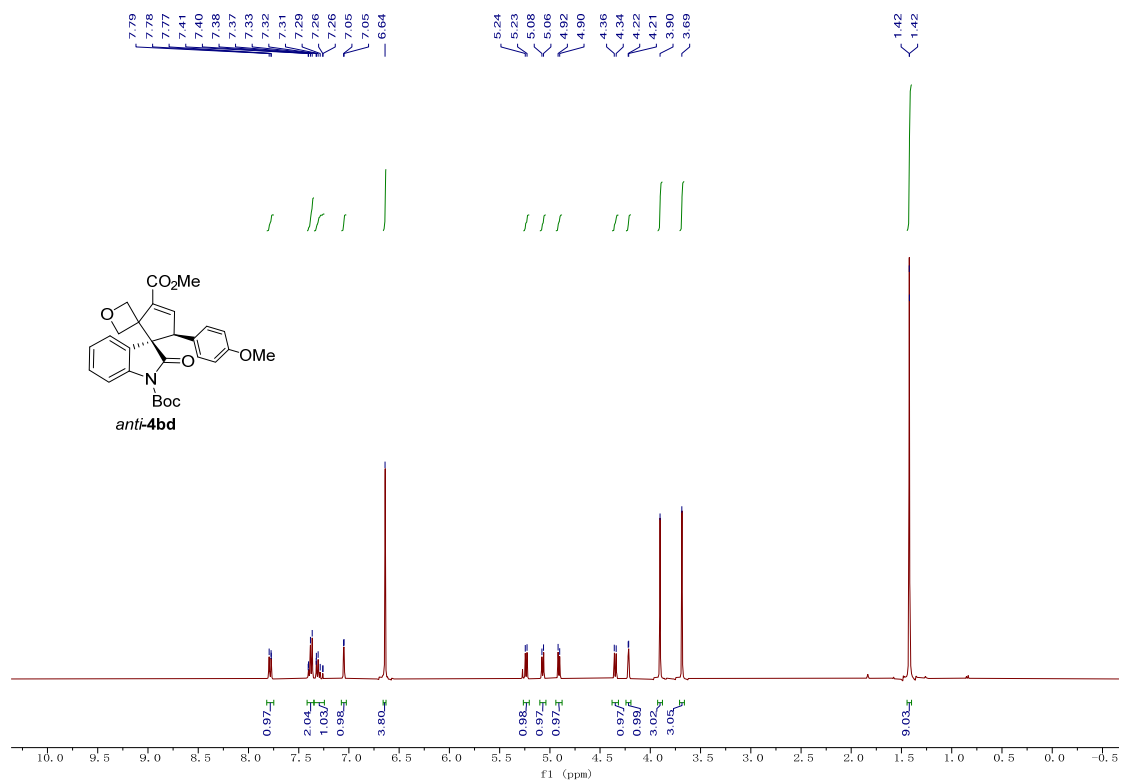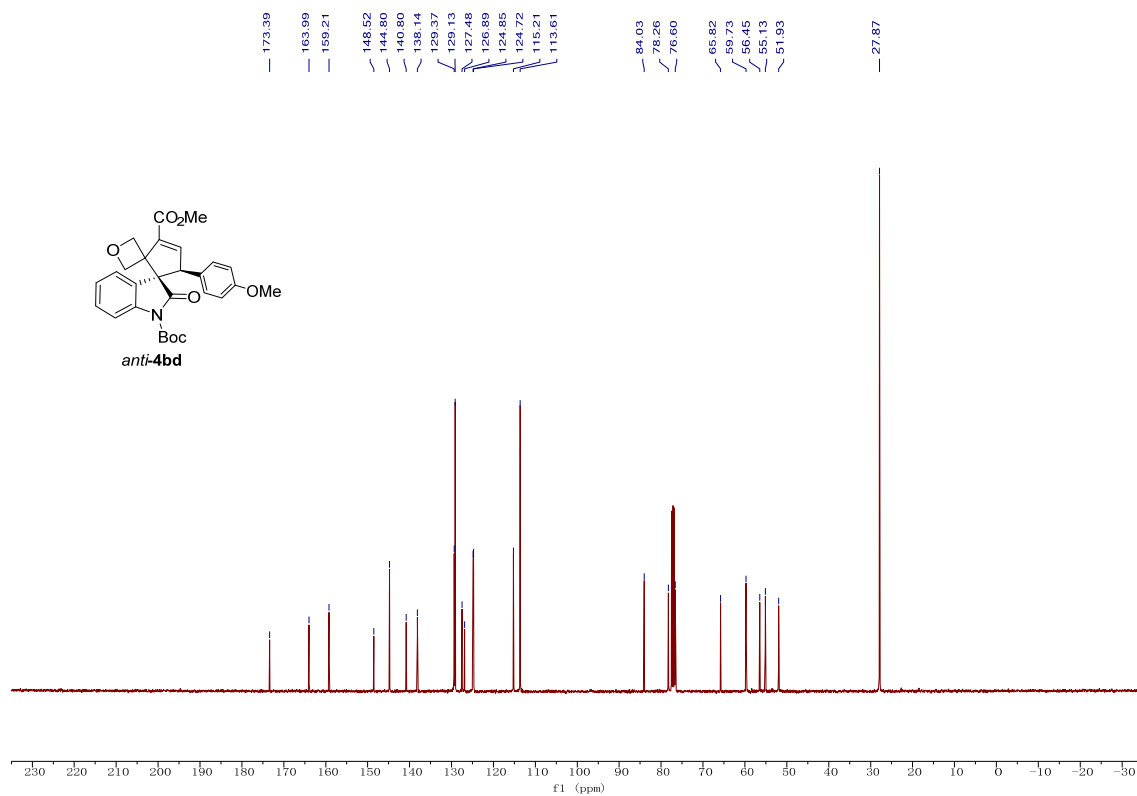

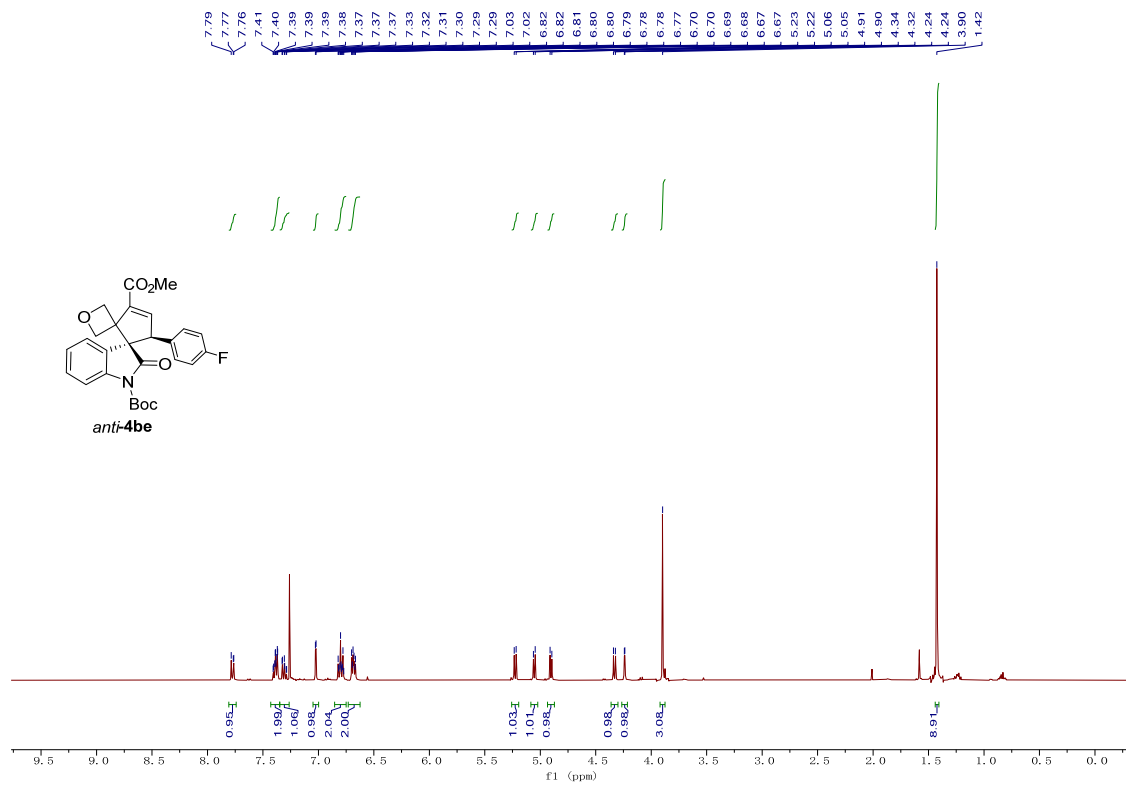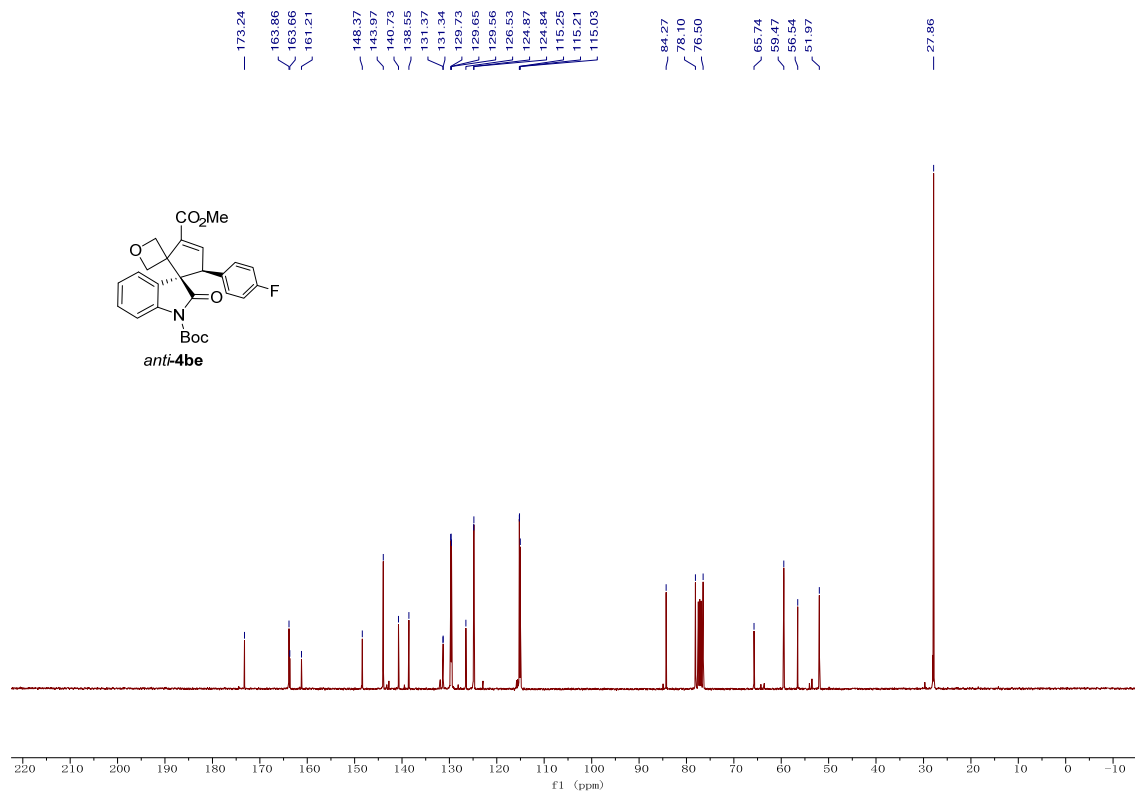

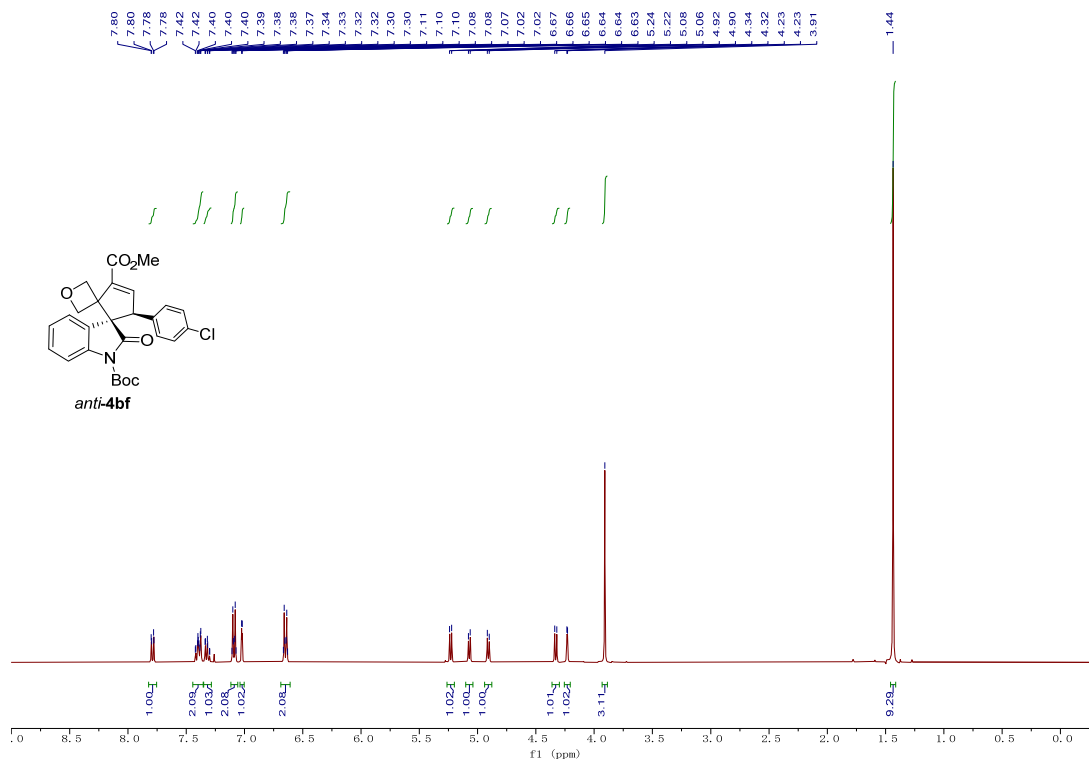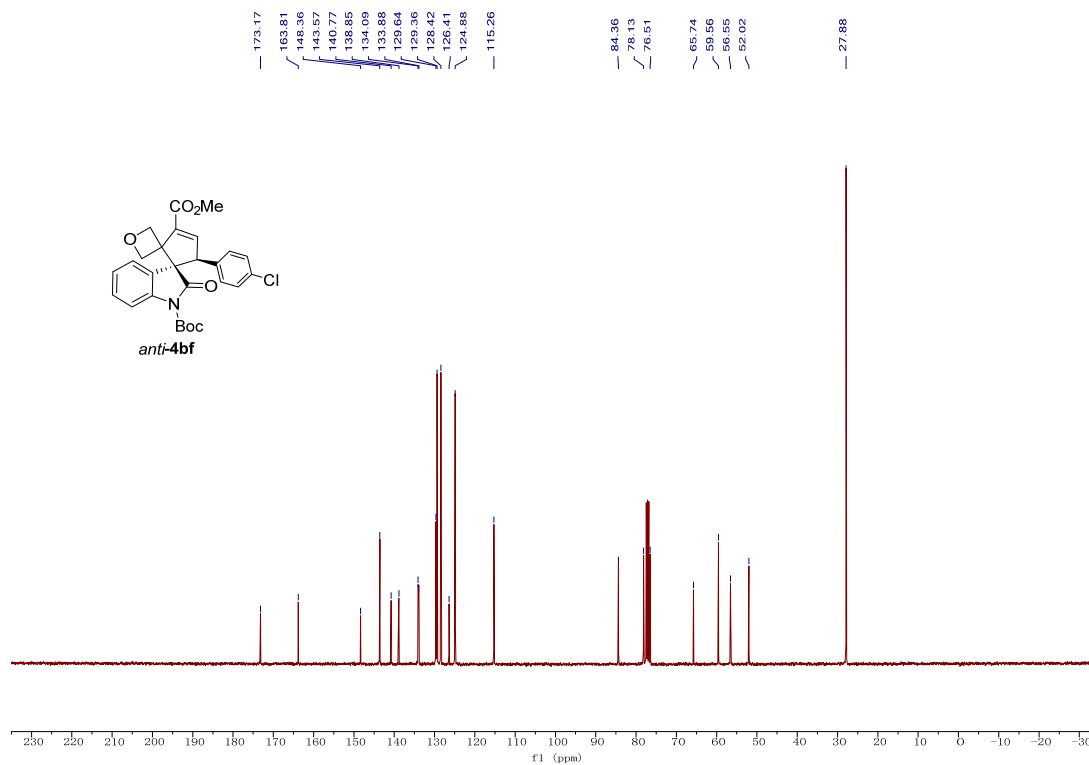



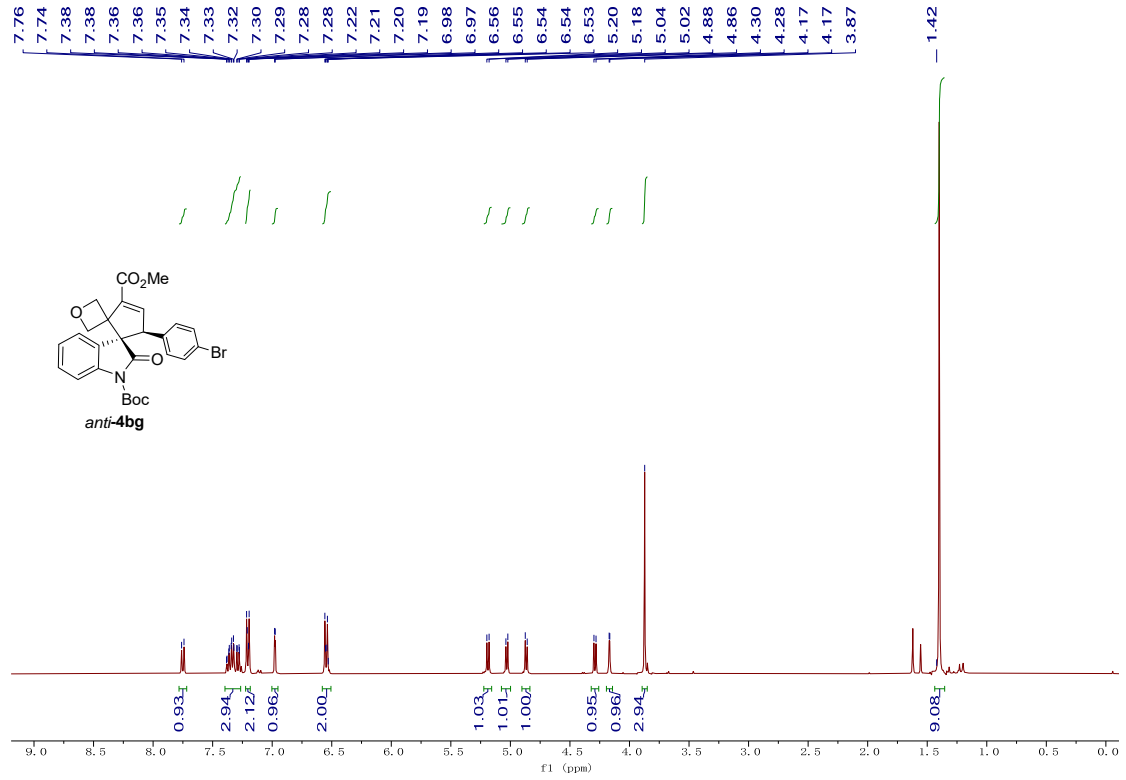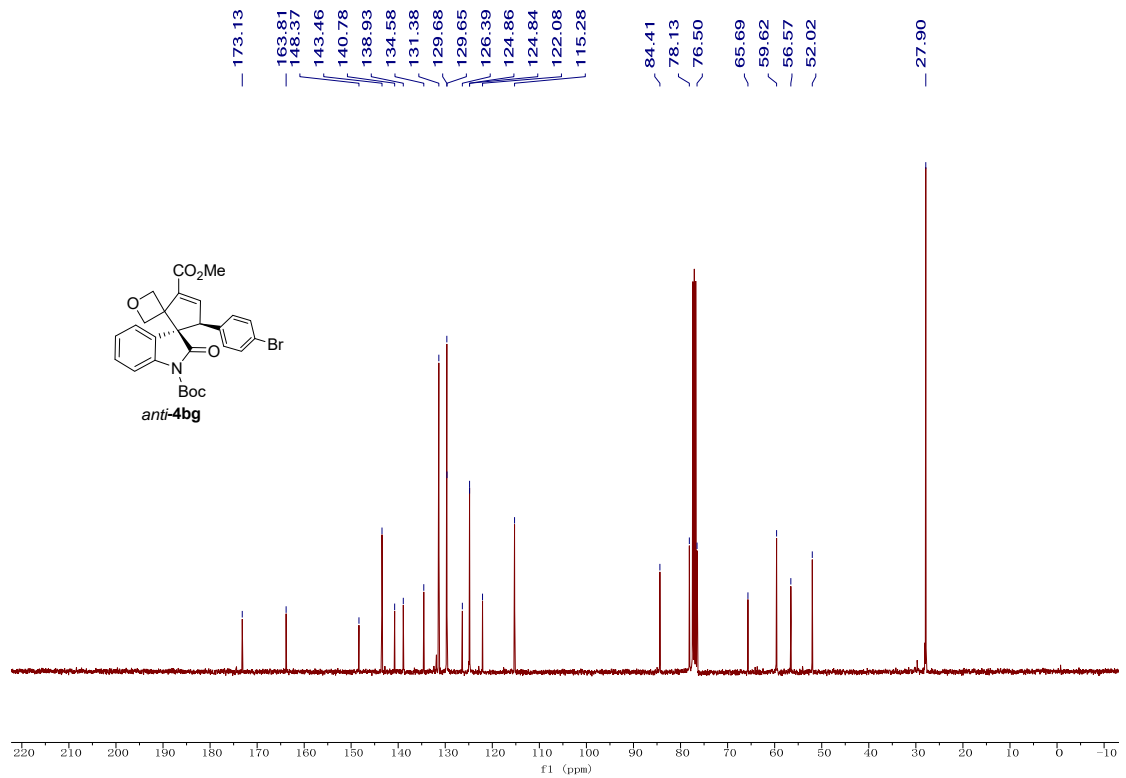

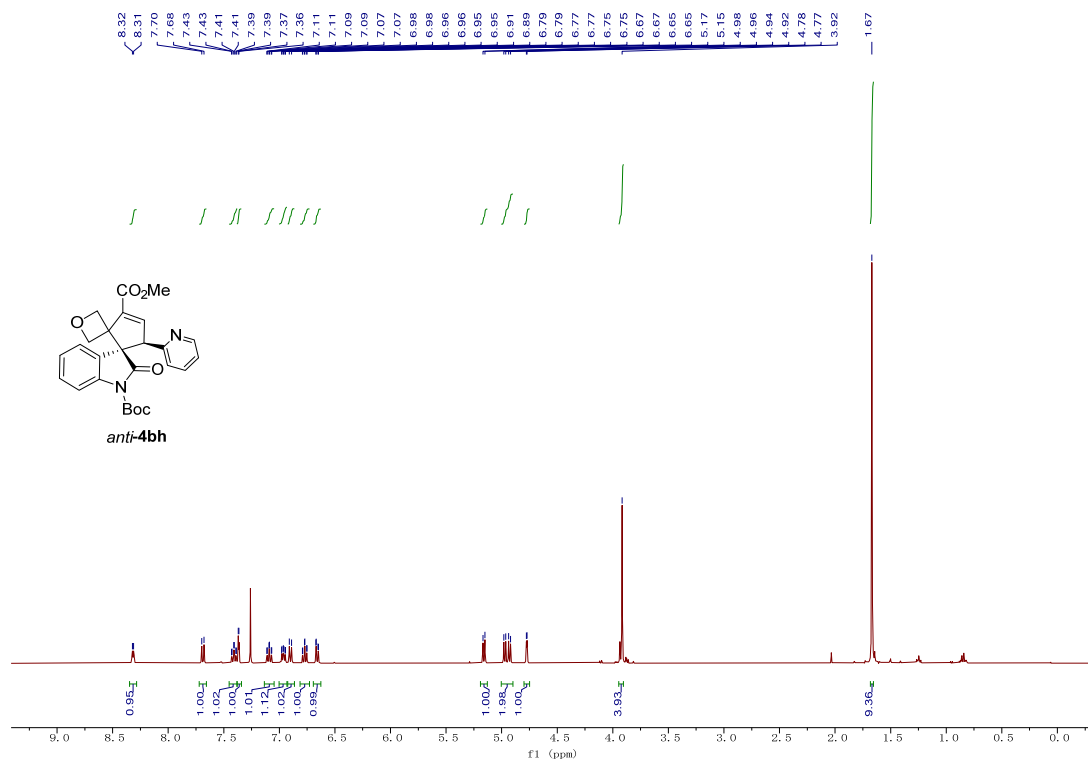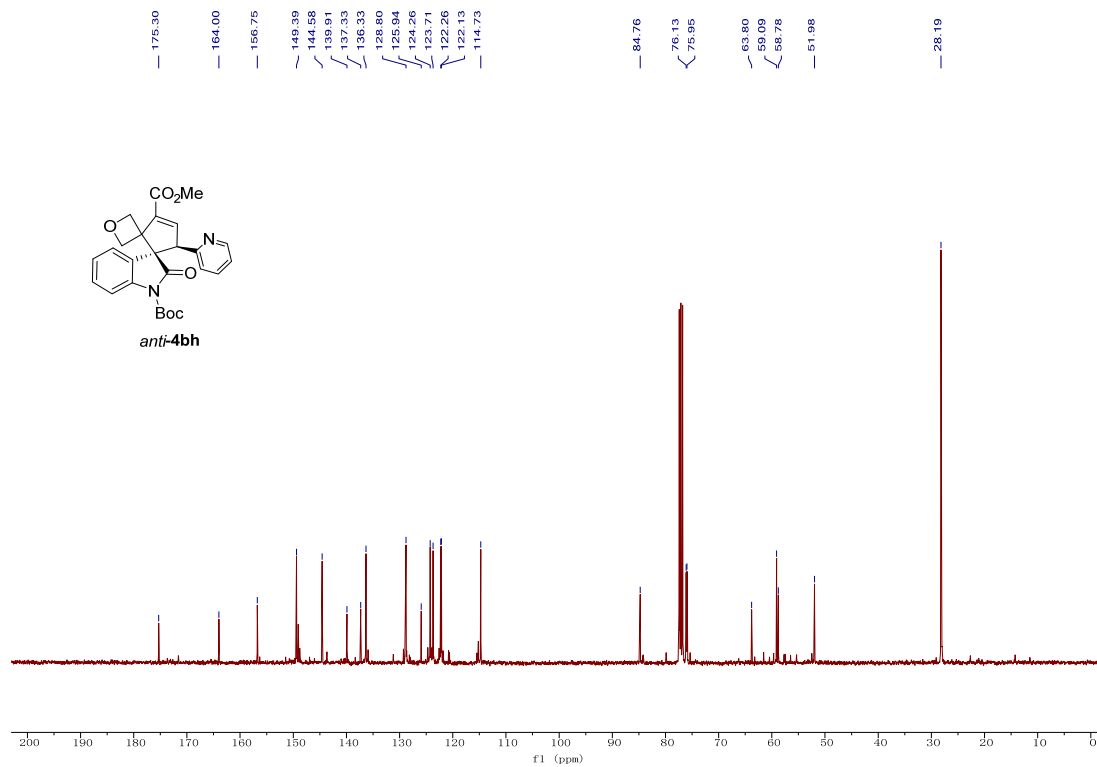

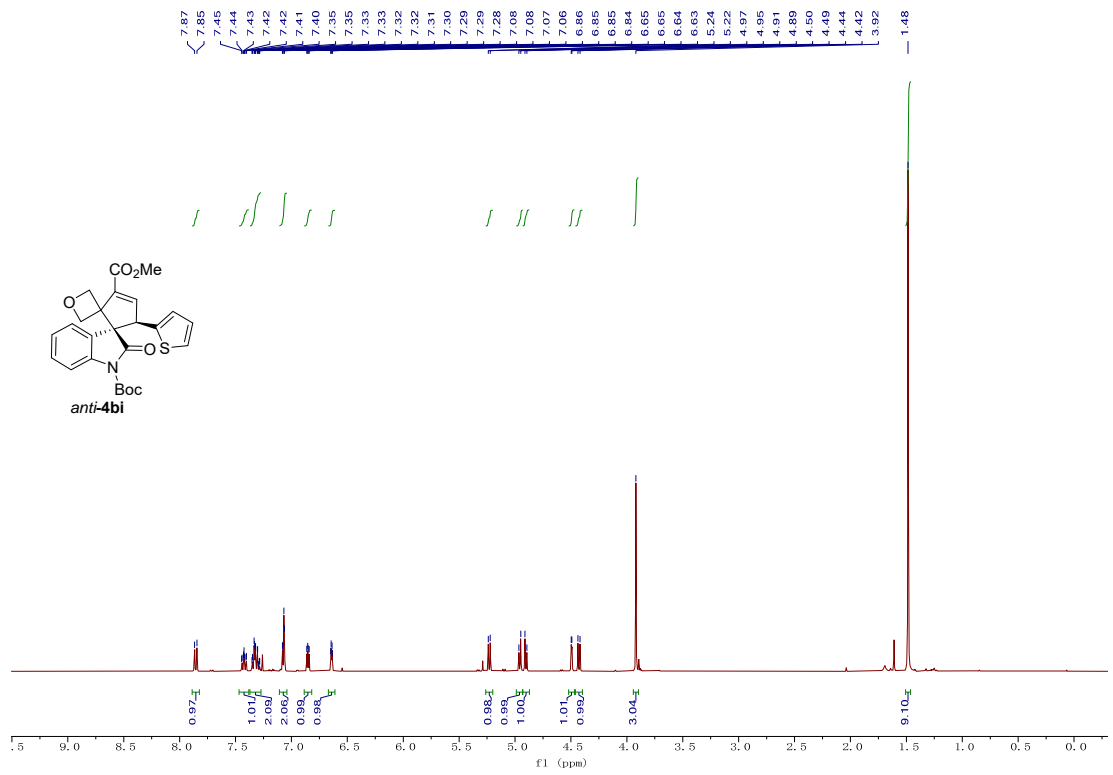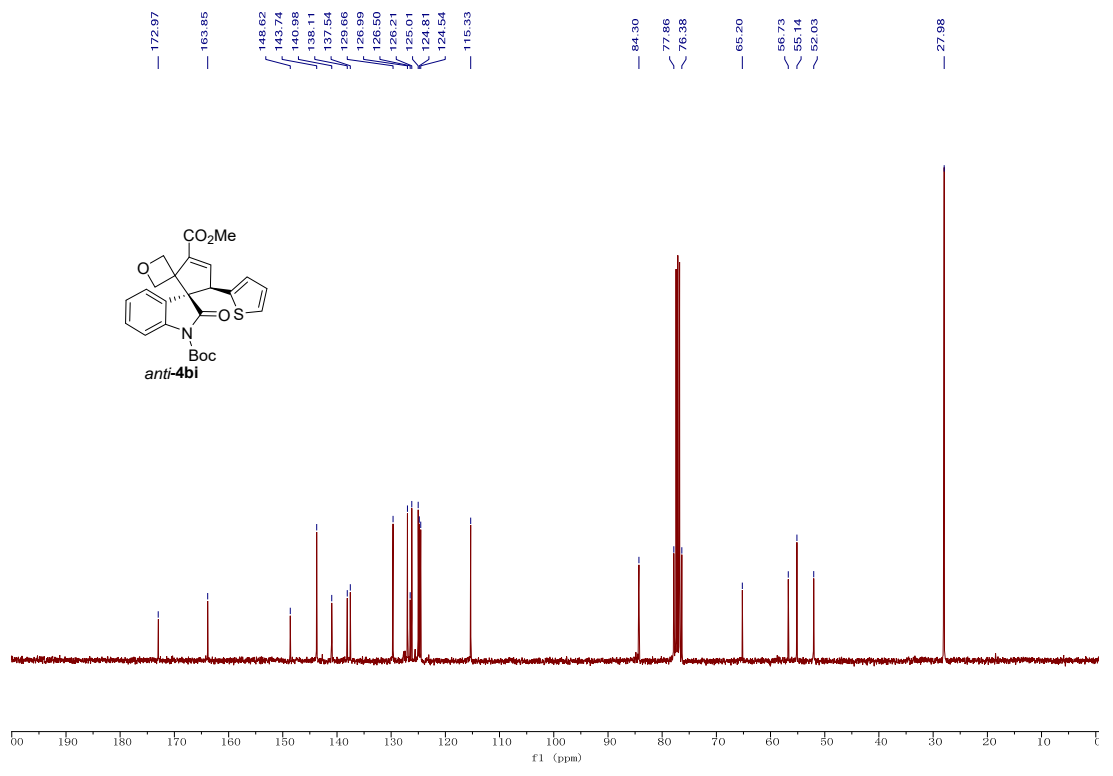

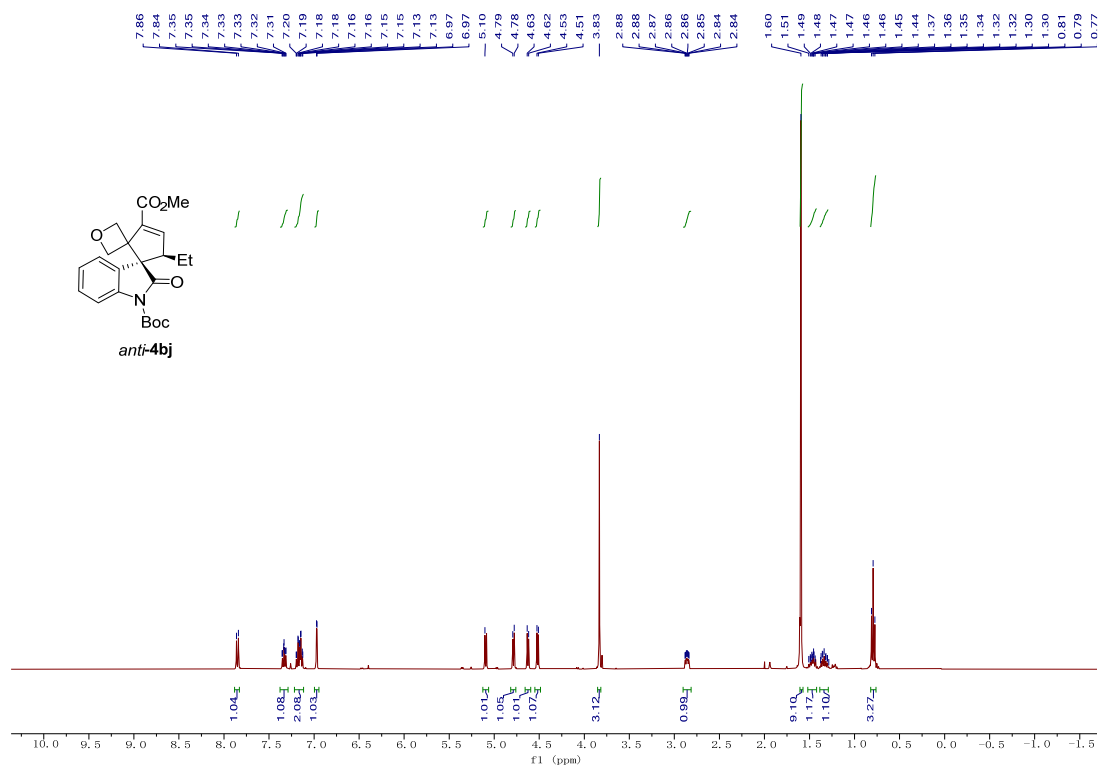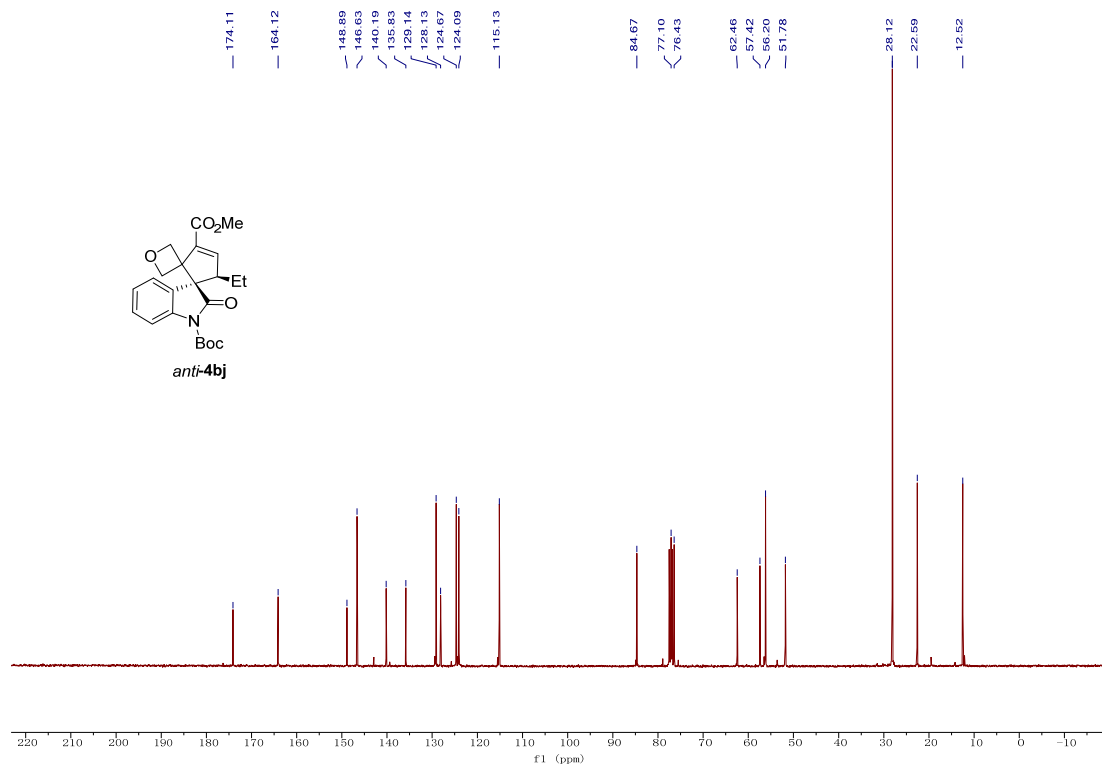

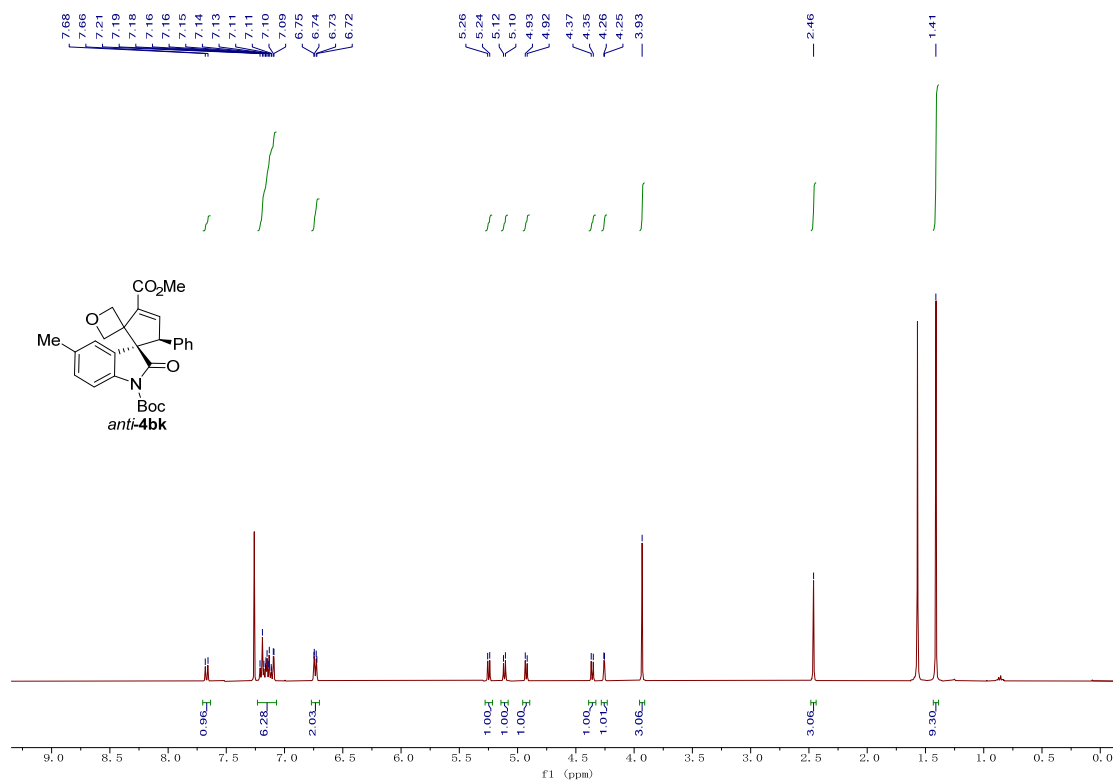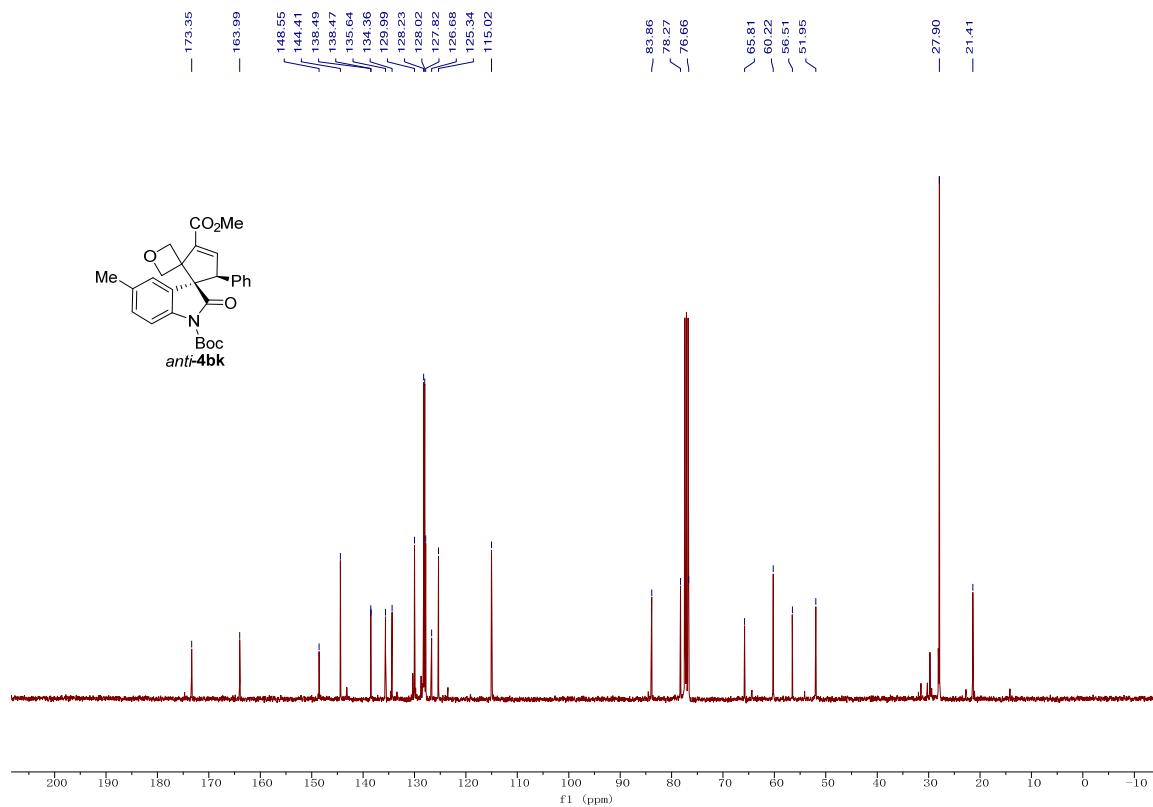

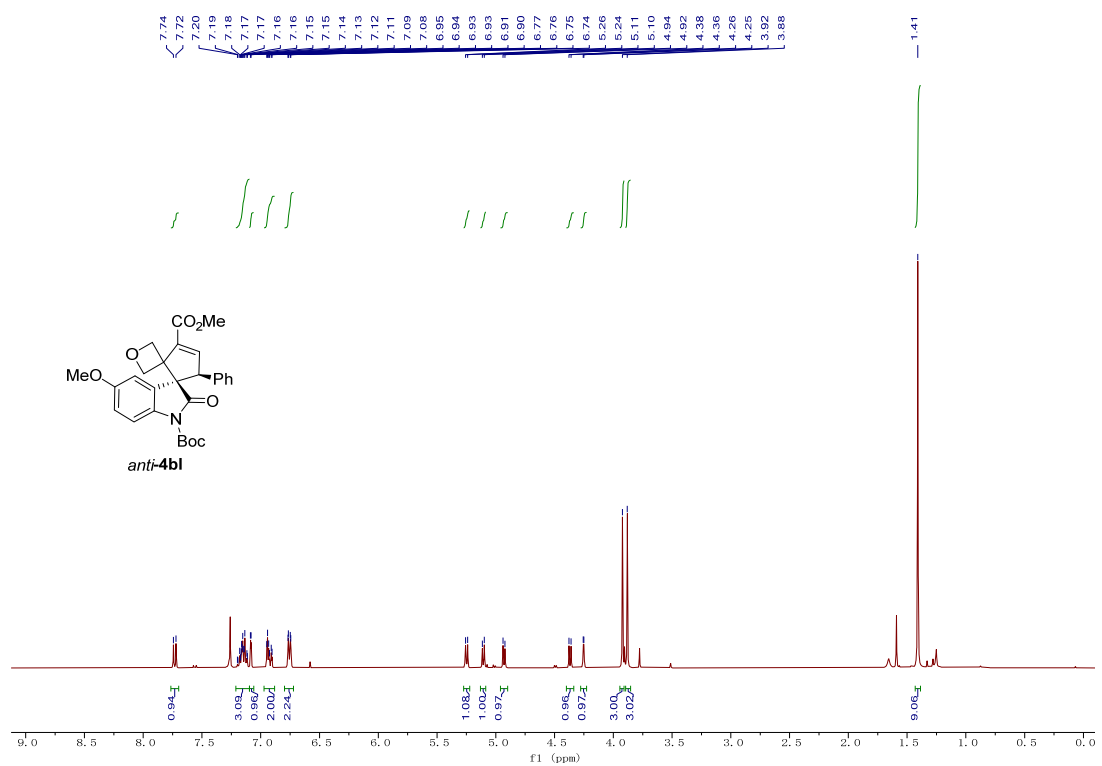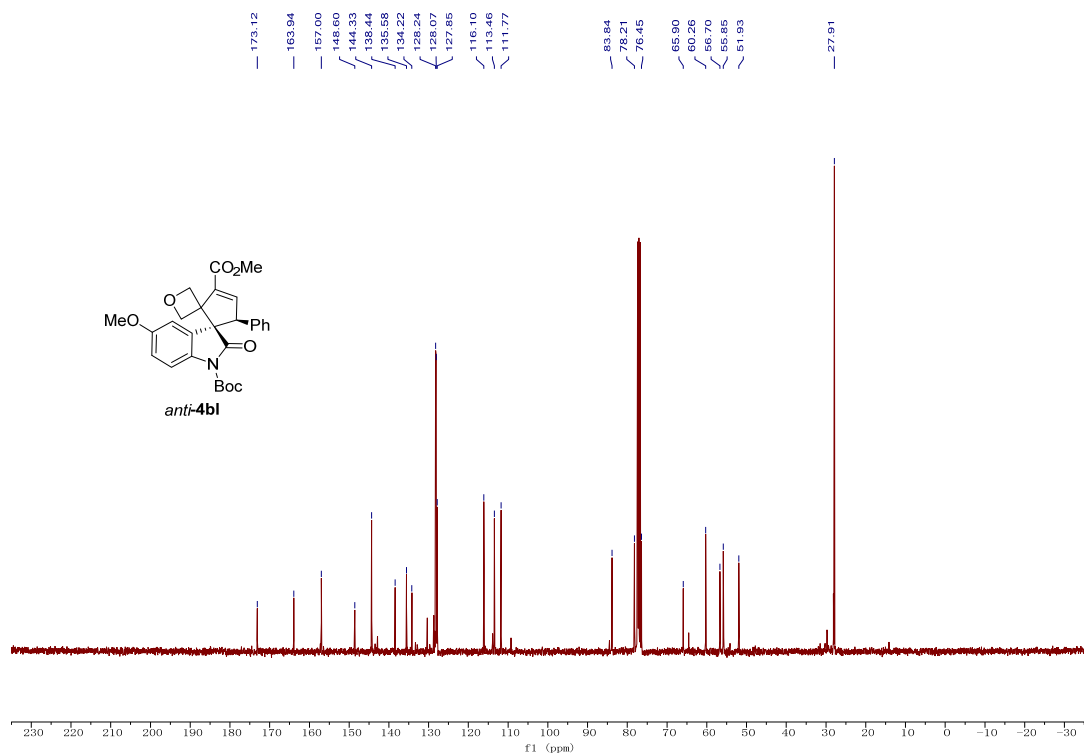

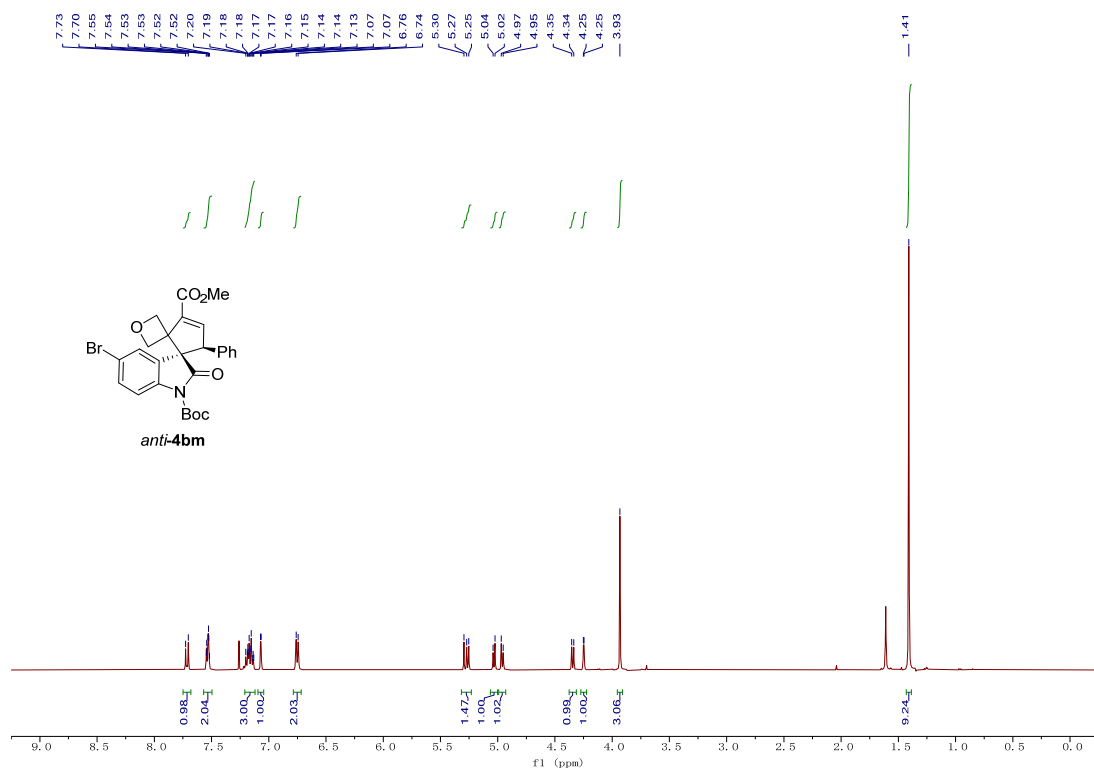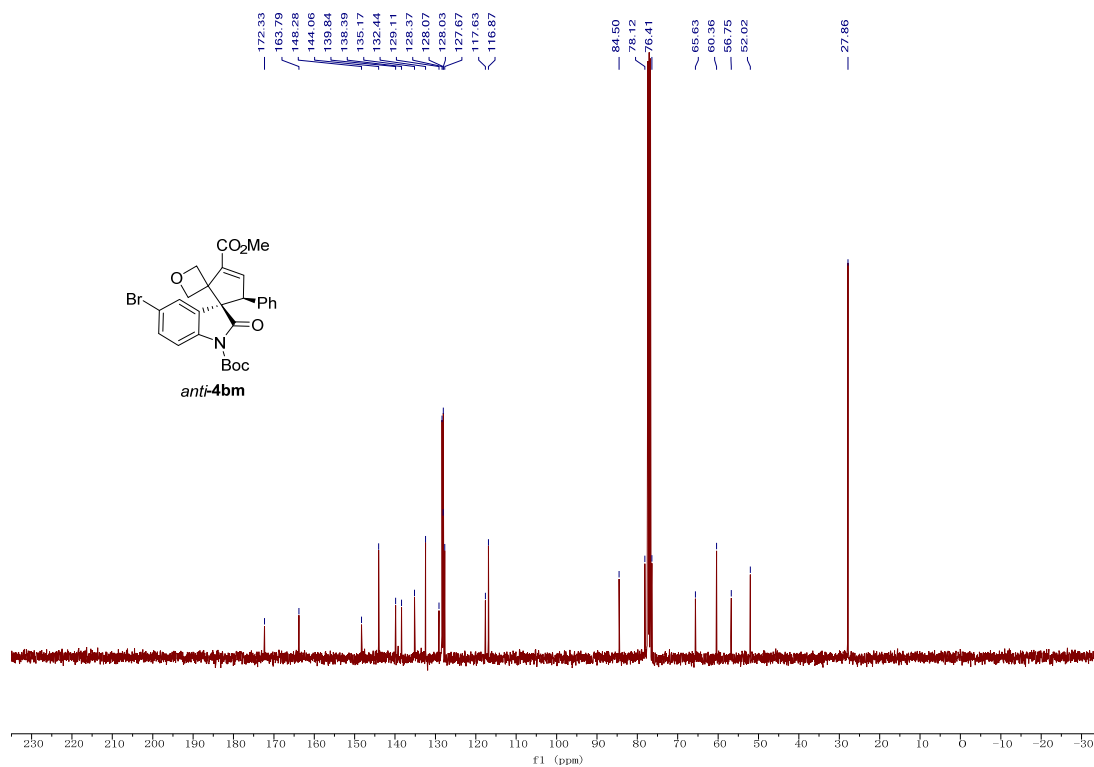

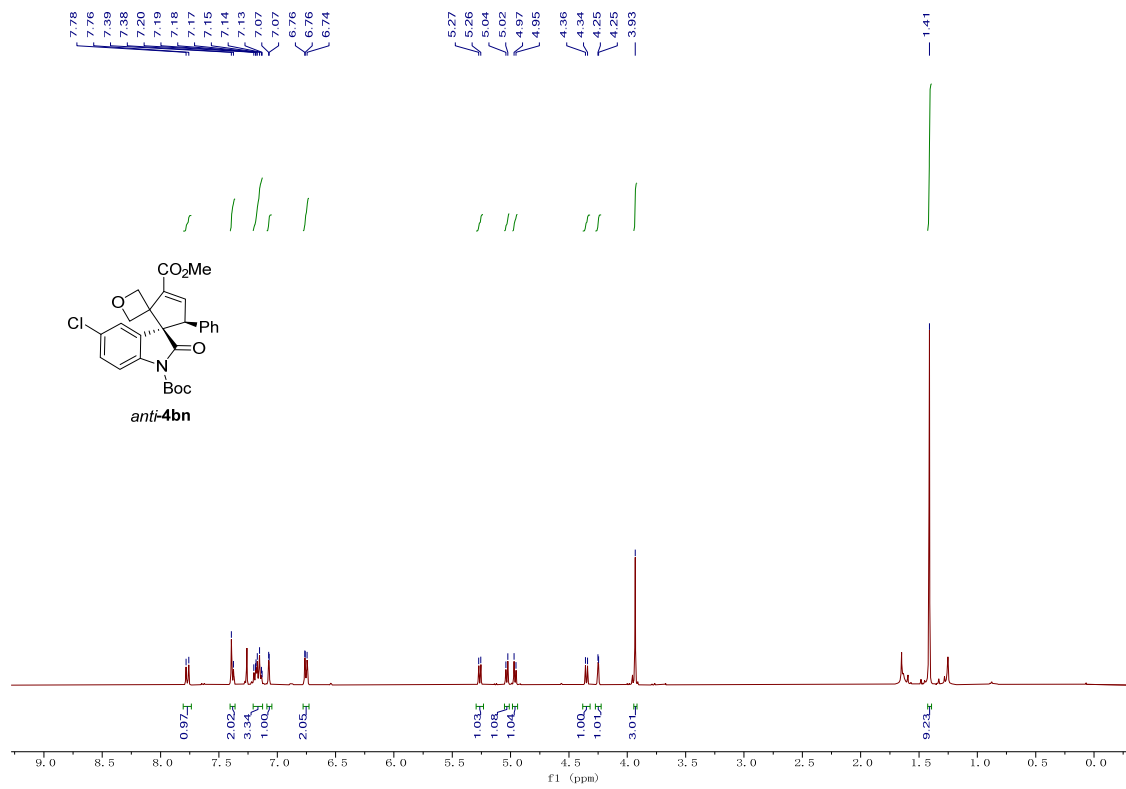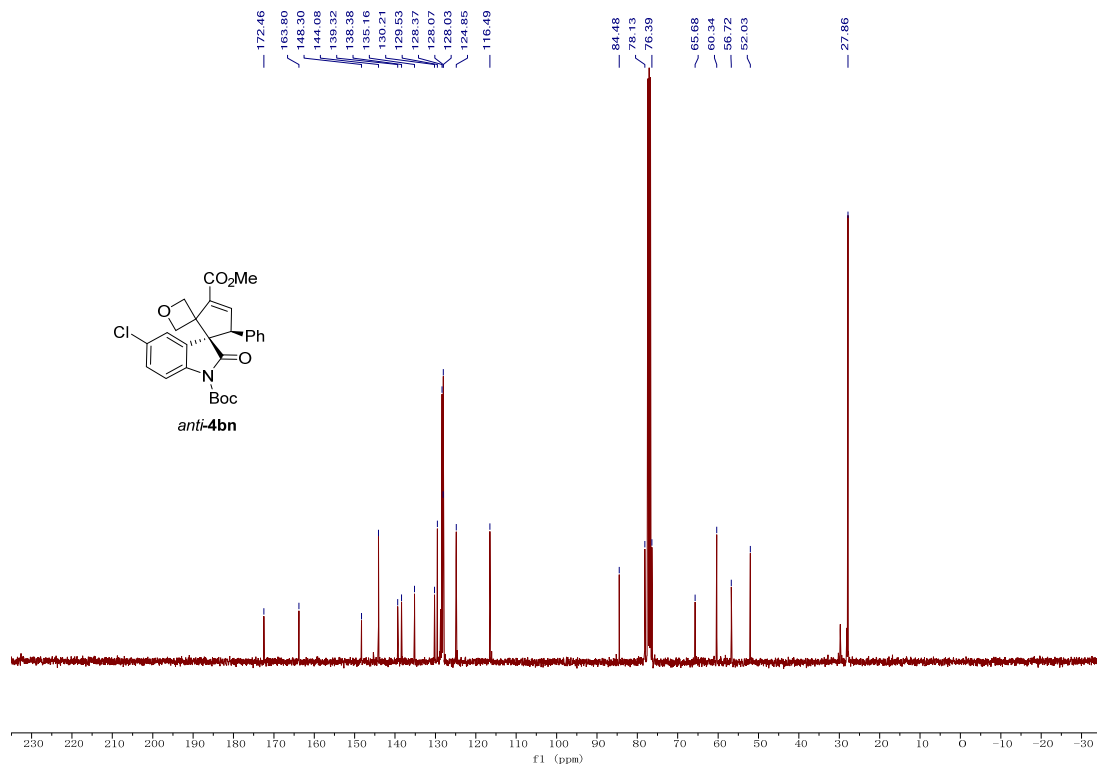



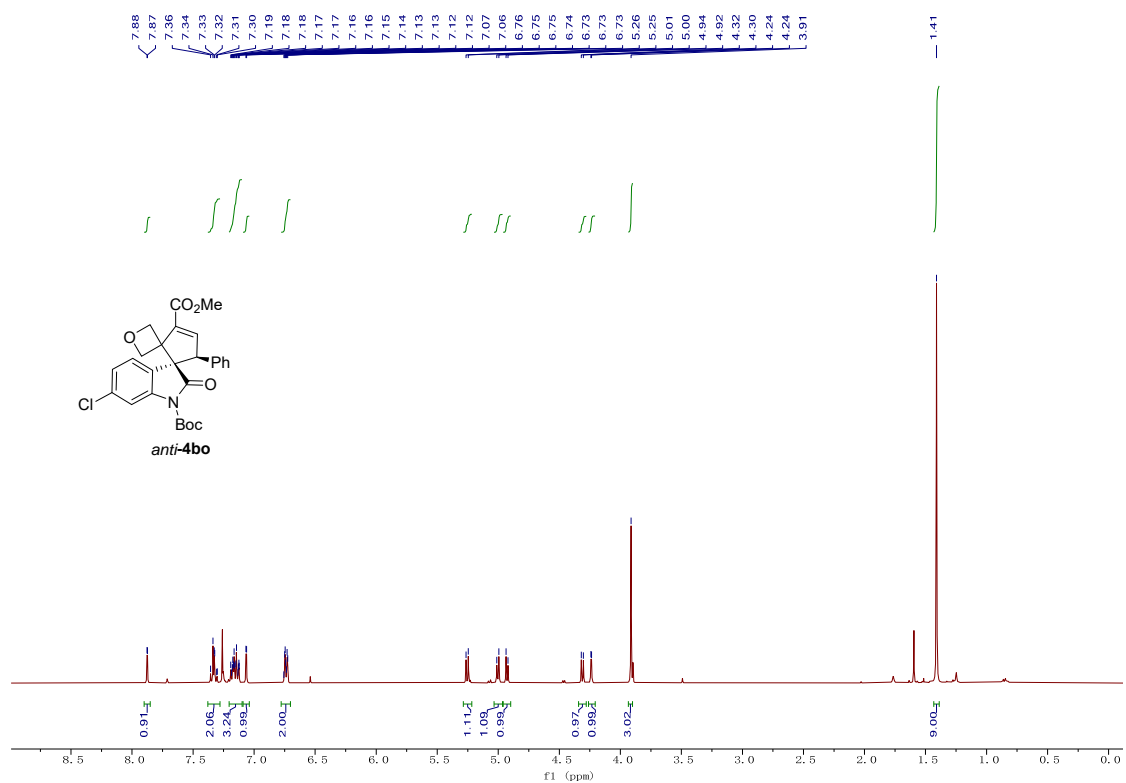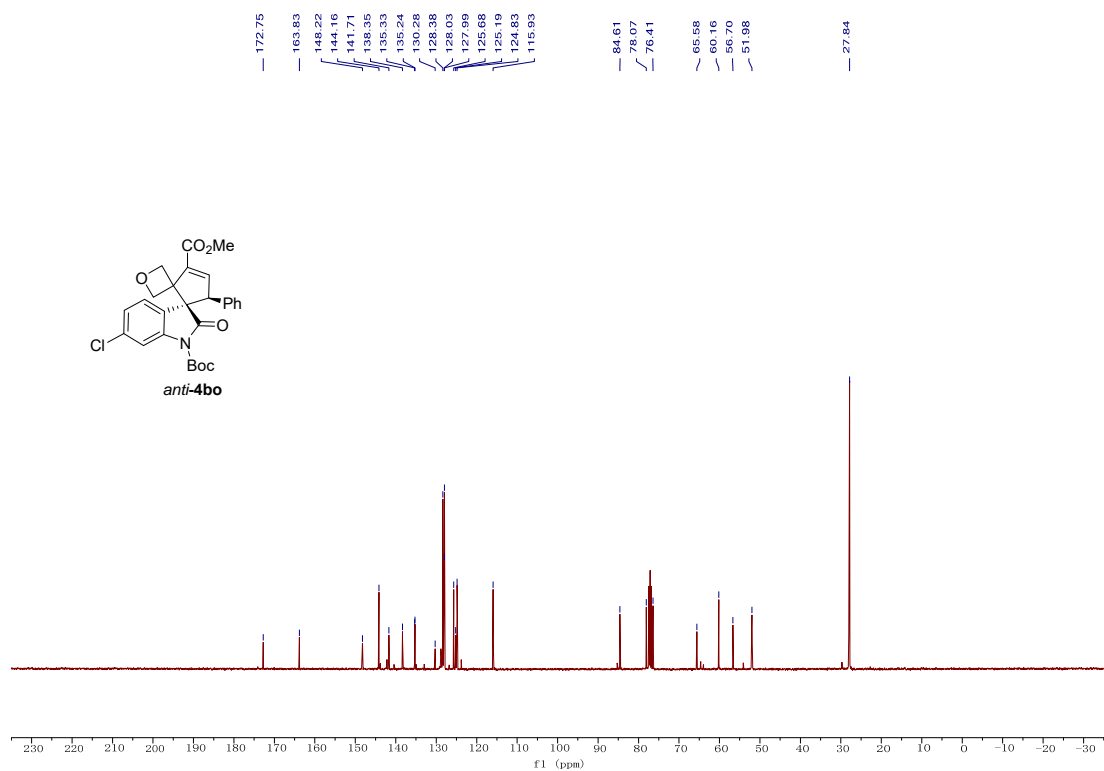

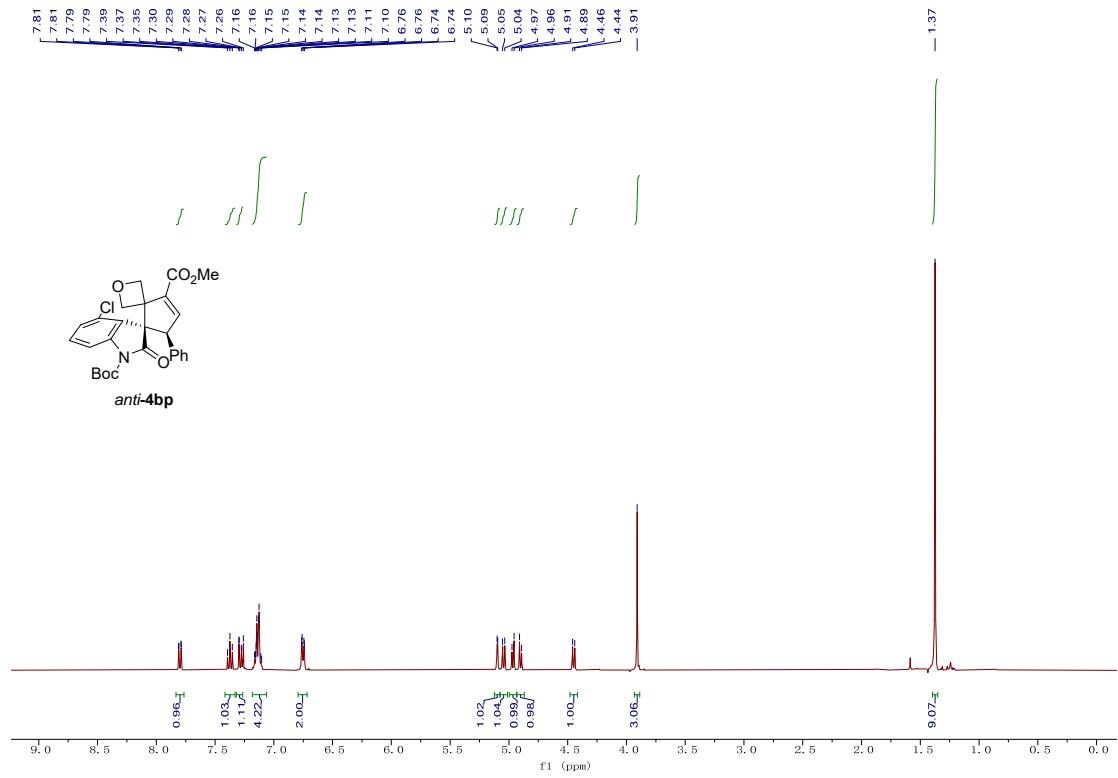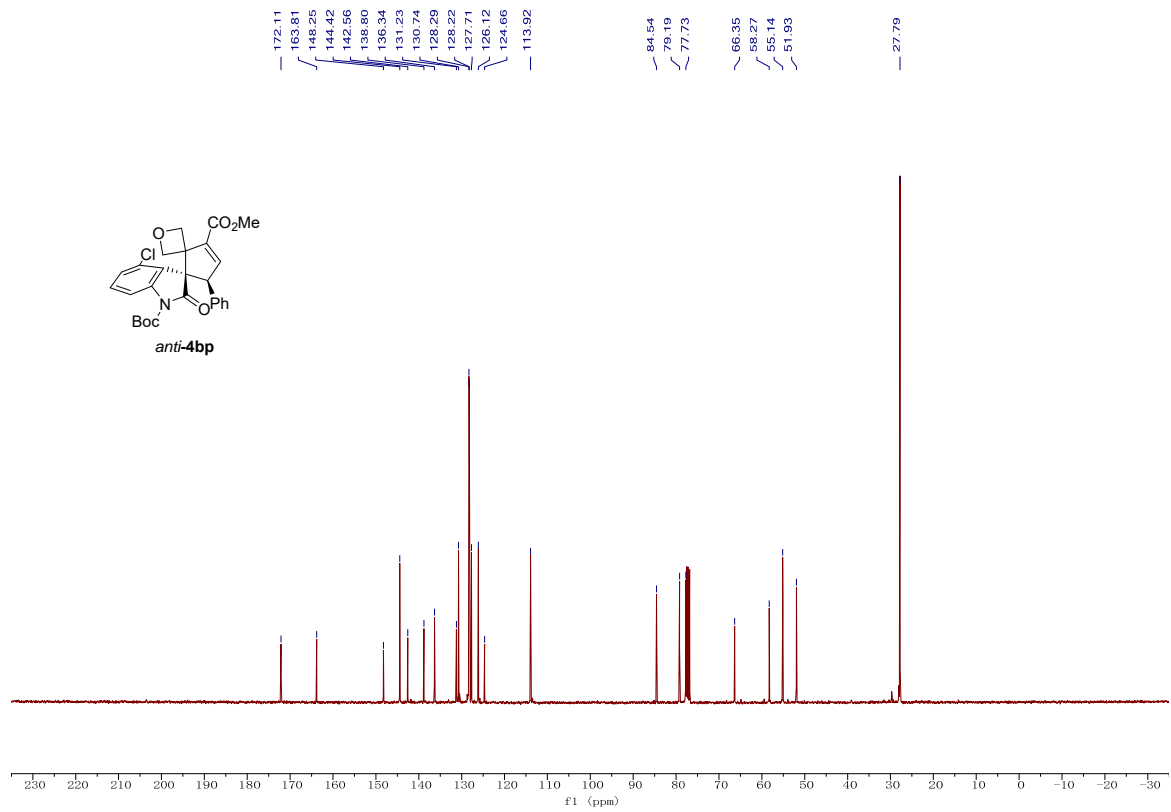

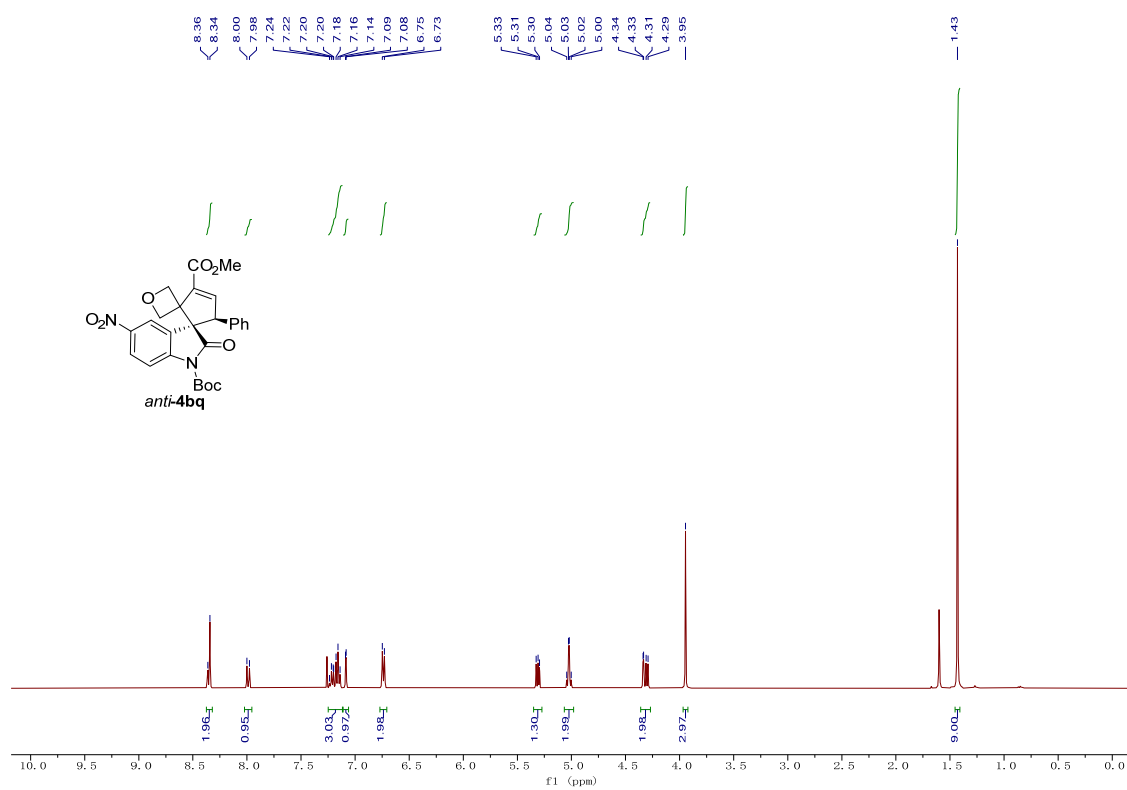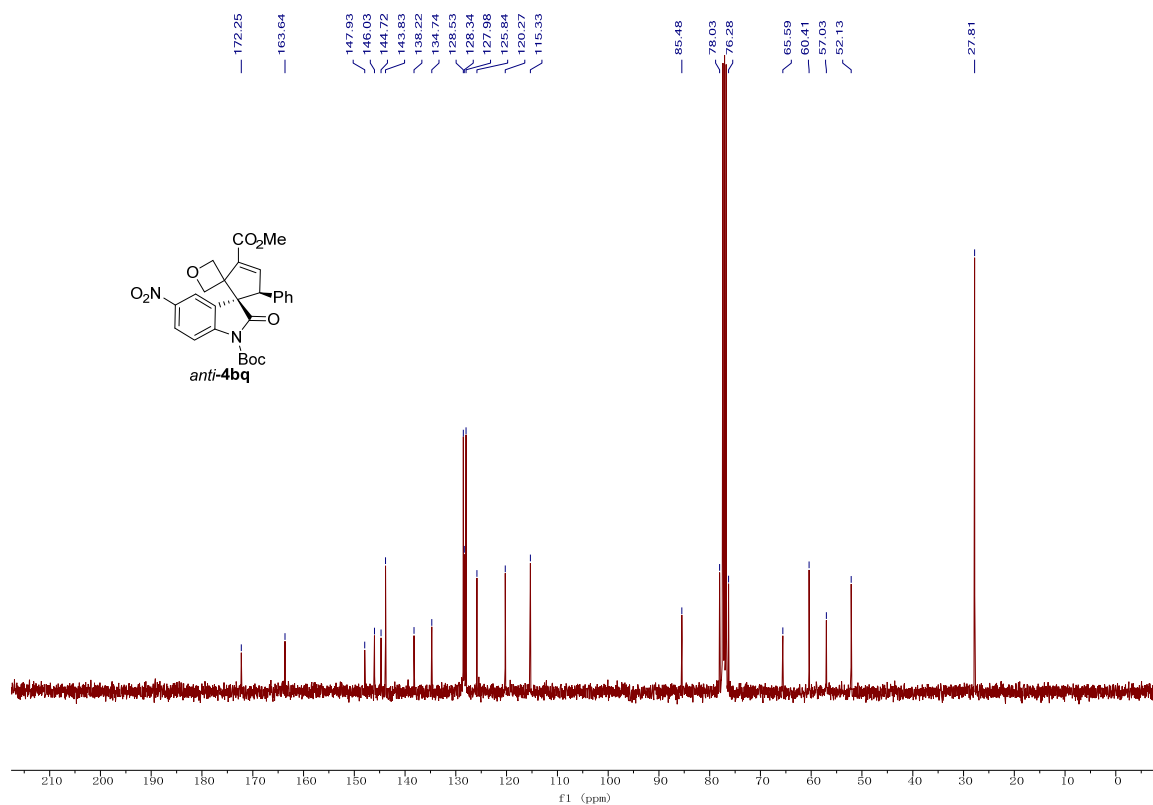

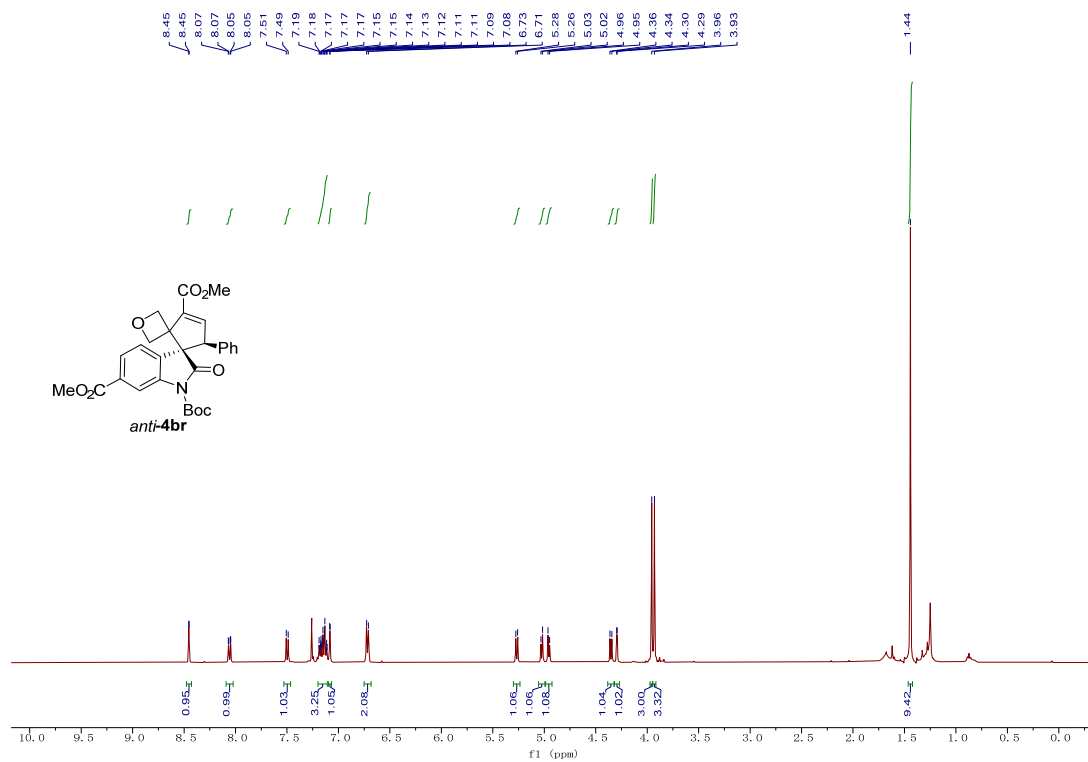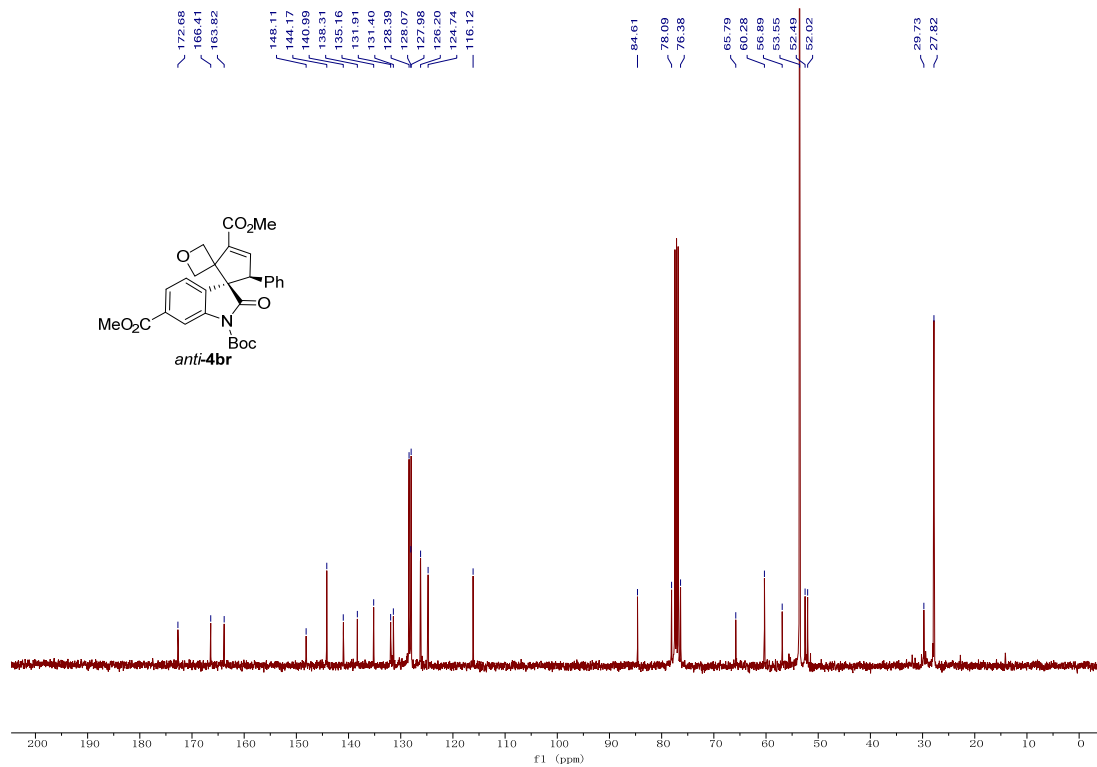

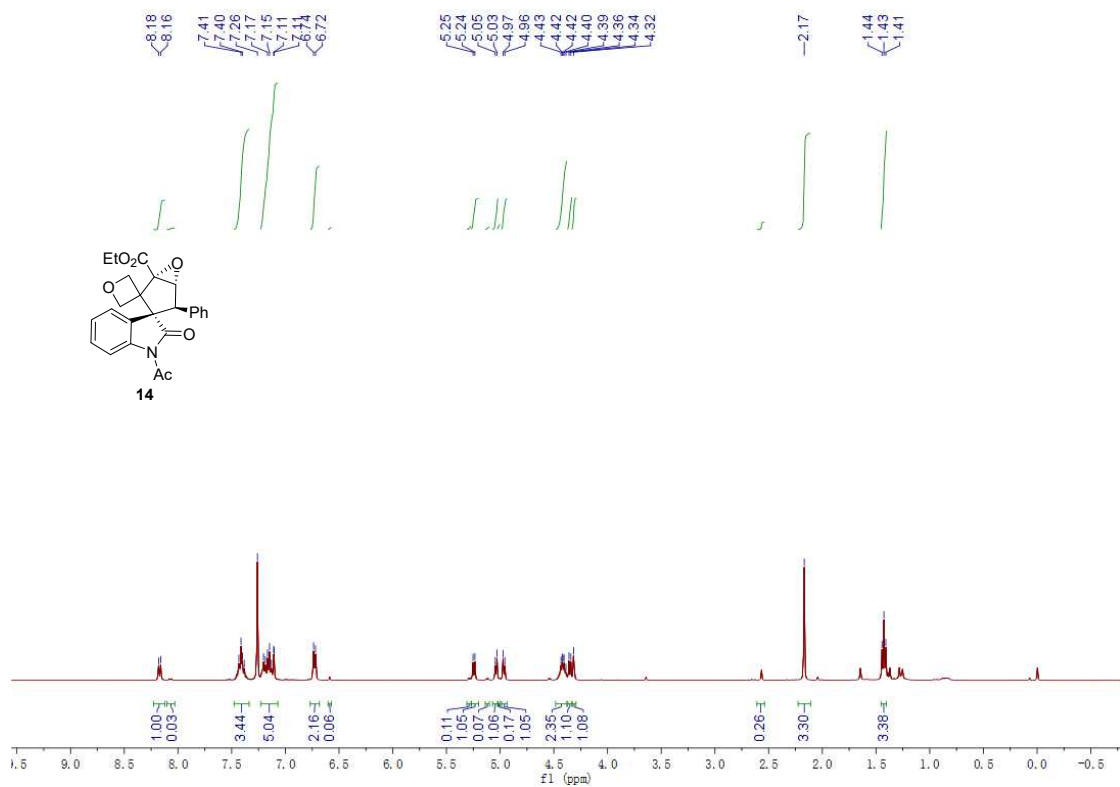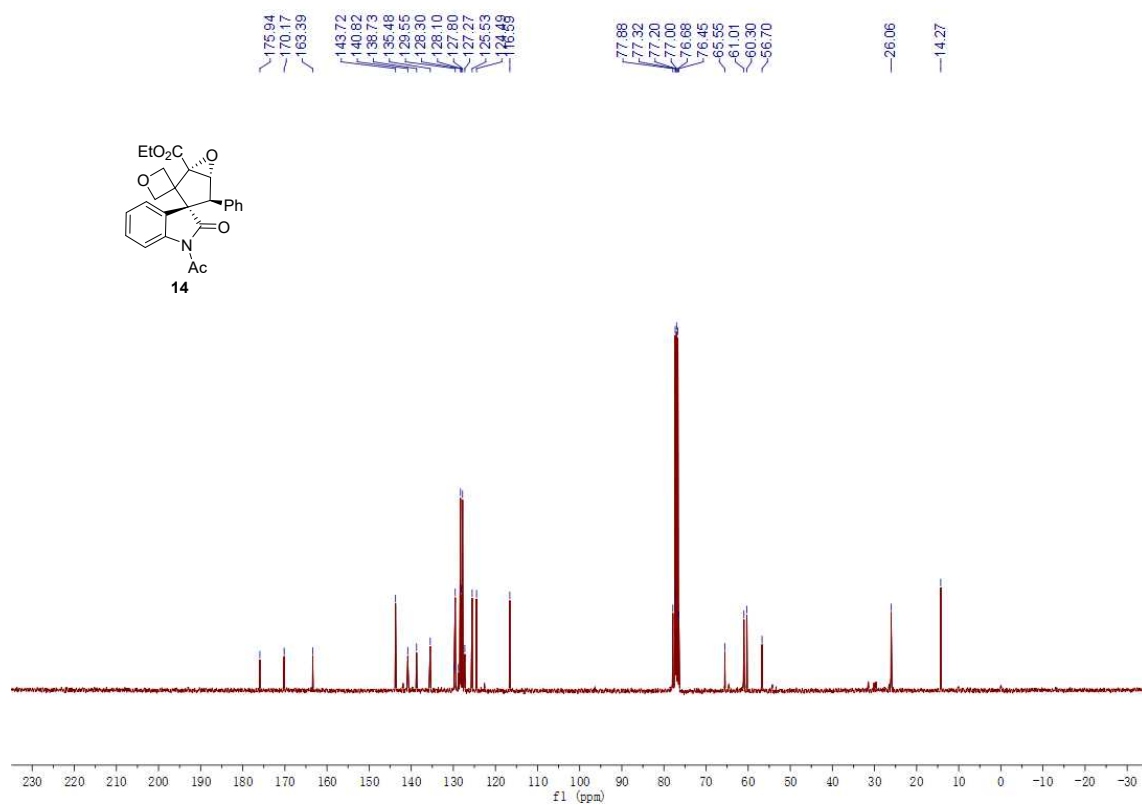

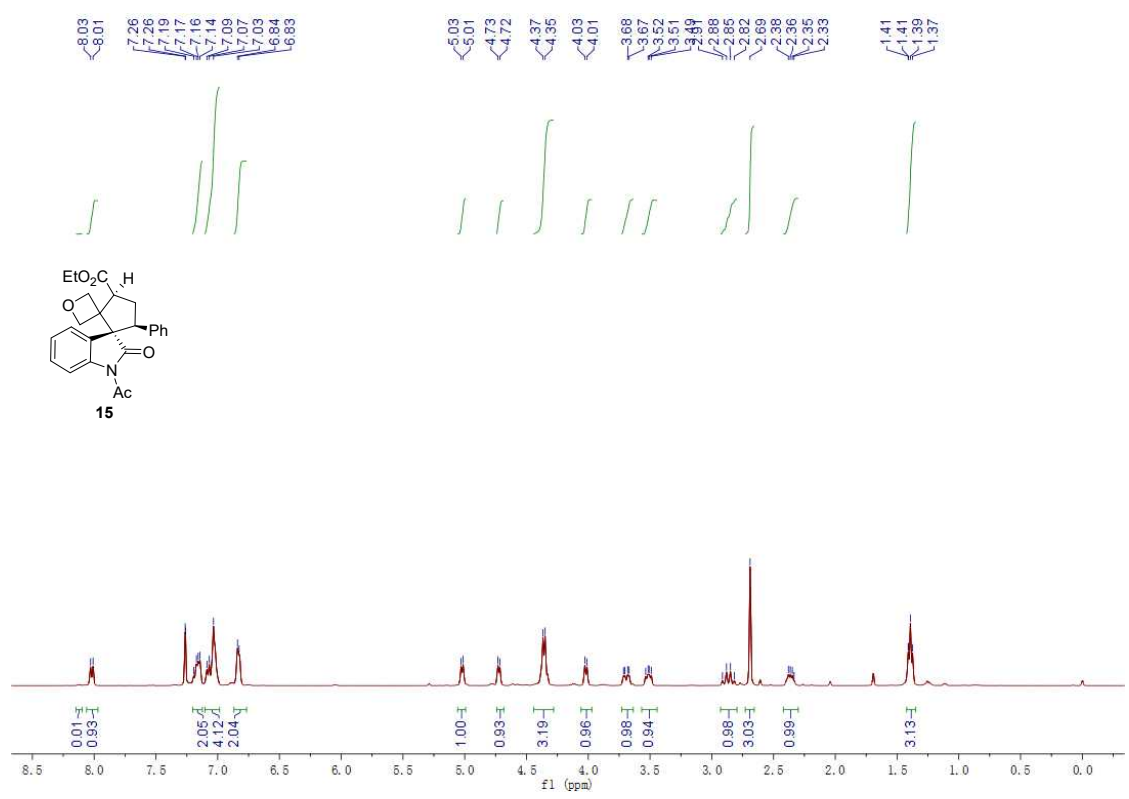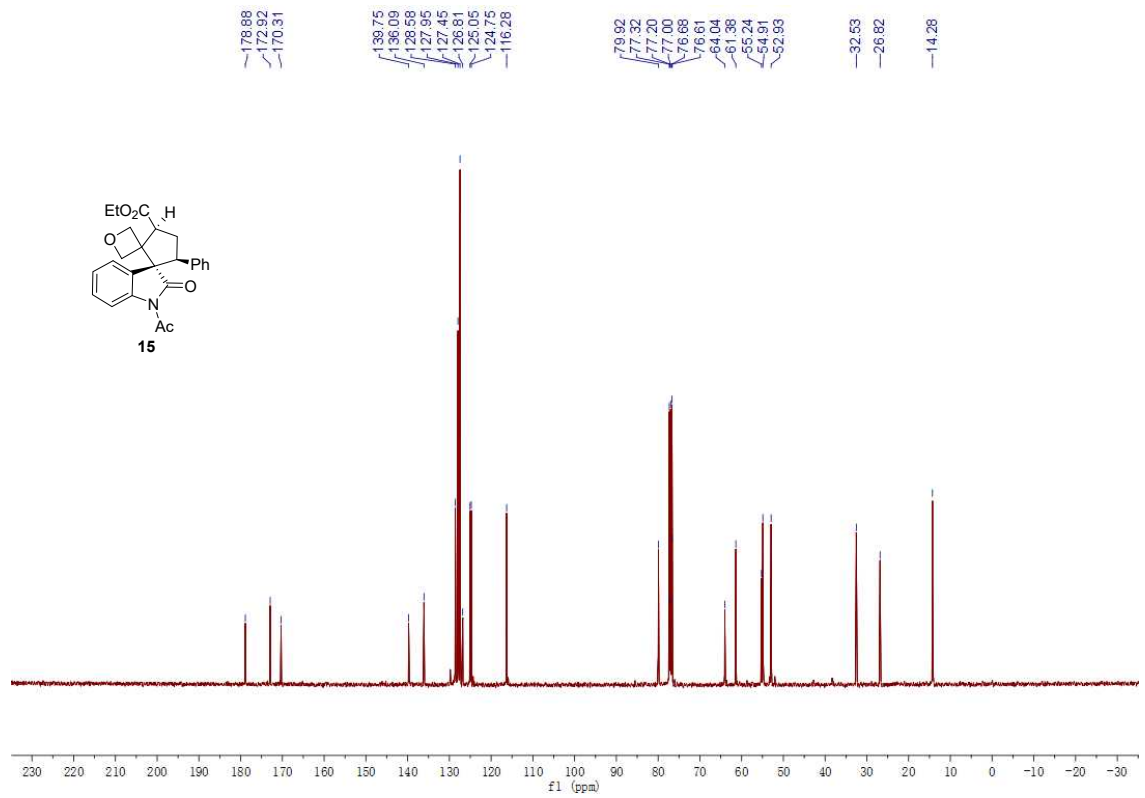

Supplement: d4cc03610g1.pdf [file d4cc03610g1.pdf]
